# Supplementary material for: Disentangling the gut microbiota of Aldabra giant tortoises of different ages and environments
Source: PeerJ. 2025 Jun 10;13:e19566. doi: 10.7717/peerj.19566 (PMC12164811; doi:10.7717/peerj.19566)
Supplement: Supplemental Information 1 [file peerj-13-19566-s001.xlsx]

## Sheet: Sheet1
Table S1. Metadata of Aldabra giant tortoises from which the samples were obtained
ID	Sample name	Sex	Age	Age Group	Environment Group	SamplingDate
1236680F1225689	4N_tarta	Not determined	2	Juveniles (2-25)	Curieuse (Nursery)	17.02.2020
1236683F1225692	26_tarta	Not determined	001-002	Juveniles (2-25)	Curieuse (Nursery)	15.05.2022
1236684F1225693	27_tarta	Not determined	001-002	Juveniles (2-25)	Curieuse (Nursery)	15.05.2022
1236677F1225686	1N_tarta	Not determined	001-002	Juveniles (2-25)	Curieuse (Nursery)	17.02.2020
1236678F1225687	2N_tarta	Not determined	002-003	Juveniles (2-25)	Curieuse (Nursery)	17.02.2020
1236679F1225688	3N_tarta	Not determined	002-003	Juveniles (2-25)	Curieuse (Nursery)	17.02.2020
1236670F1225679	4Na_tarta	Not determined	002-003	Juveniles (2-25)	Curieuse (Nursery)	17.02.2020
1236663F1225672	19N_tarta	Not determined	004-005	Juveniles (2-25)	Curieuse (Nursery)	15.02.2020
1236699F1225708	31C_tarta	Not determined	004-005	Juveniles (2-25)	Curieuse (Nursery)	17.02.2020
1236674F1225683	n8_tarta	Not determined	004-005	Juveniles (2-25)	Curieuse (Nursery)	14.02.2020
1236690F1225699	30F_tarta	Not determined	004-005	Juveniles (2-25)	Private Garden	15.05.2022
1236691F1225700	31F_tarta	Not determined	004-005	Juveniles (2-25)	Private Garden	15.05.2022
1236689F1225698	29F_tarta	Not determined	004-005	Juveniles (2-25)	Private Garden	15.05.2022
1236682F1225691	25F_tarta	Not determined	005 -	Juveniles (2-25)	Curieuse (Nursery)	15.05.2022
1236688F1225697	19F_tarta	F	005-006	Juveniles (2-25)	Botanical Garden	15.05.2022
1236692F1225701	7_tarta	F	015 -	Juveniles (2-25)	Parco Natura Viva	21.06.2021
1236695F1225704	11_tarta	F	015 -	Juveniles (2-25)	Parco Natura Viva	21.06.2021
1236695F1225704	11_tarta	F	015 -	Juveniles (2-25)	Parco Natura Viva	21.06.2021
1236700F1225709	1BG_tarta	F	030-040	Adults (26-70)	Botanical Garden	19.02.2020
1236702F1225711	3BG_tarta	F	030-040	Adults (26-70)	Botanical Garden	19.02.2020
1236703F1225712	4BG_tarta	M	030-040	Adults (26-70)	Botanical Garden	19.02.2020
1236681F1225690	24F_tarta	M	030-040	Adults (26-70)	Curieuse	15.05.2022
1236658F1225667	24C_tarta	F	030-040	Adults (26-70)	Curieuse	16.02.2020
1236657F1225666	7C_tarta	F	030-040	Adults (26-70)	Curieuse	14.02.2020
1236672F1225681	10BG_tarta	M	040-050	Adults (26-70)	Botanical Garden	19.02.2020
1236701F1225710	2BG_tarta	F	040-050	Adults (26-70)	Botanical Garden	19.02.2020
1236705F1225714	6BG_tarta	M	040-050	Adults (26-70)	Botanical Garden	19.02.2020
1236687F1225696	18F_tarta	F	040-050	Adults (26-70)	Botanical Garden	15.05.2022
1236696F1225705	20C_tarta	F	040-050	Adults (26-70)	Curieuse	16.02.2020
1236664F1225673	12GH_tarta (=20C)	F	040-050	Adults (26-70)	Curieuse	15.02.2020
1236706F1225715	7BG_tarta	F	050-060	Adults (26-70)	Botanical Garden	19.02.2020
1236669F1225678	17C_tarta	M	060-070	Adults (26-70)	Curieuse	15.02.2020
1236662F1225671	n2_tarta	M	070-080	Elderly (71-100)	Curieuse	14.02.2020
1236673F1225682	n6_tarta	M	070-080	Elderly (71-100)	Curieuse	14.02.2020
1236675F1225684	n9_tarta	M	070-080	Elderly (71-100)	Curieuse	15.02.2020
1236704F1225713	5BG_tarta	M	080-090	Elderly (71-100)	Botanical Garden	19.02.2020
1236685F1225694	16F_tarta	M	080-090	Elderly (71-100)	Botanical Garden	15.05.2022
1236686F1225695	17F_tarta	M	080-090	Elderly (71-100)	Botanical Garden	15.05.2022
1236668F1225677	22F_tarta	M	080-090	Elderly (71-100)	Curieuse	15.05.2022
1236666F1225675	27C_tarta	M	080-090	Elderly (71-100)	Curieuse	16.02.2020
1236708F1225717	15C_tarta	M	080-090	Elderly (71-100)	Curieuse	15.02.2020
1236659F1225668	28C_tarta	M	080-090	Elderly (71-100)	Curieuse	16.02.2020
1236697F1225706	21C_tarta	M	080-090	Elderly (71-100)	Curieuse	16.02.2020
1236661F1225670	9BG_tarta	M	090-100	Elderly (71-100)	Botanical Garden	18.02.2020
1236660F1225669	30C_tarta	M	090-100	Elderly (71-100)	Curieuse	17.02.2020
1236698F1225707	22C_tarta	M	090-100	Elderly (71-100)	Curieuse	16.02.2020
1236676F1225685	n10_tarta	M	090-100	Elderly (71-100)	Curieuse	15.02.2020
1236707F1225716	8BG_tarta	M	100 +	Centenarians (101+)	Botanical Garden	19.02.2020
1236665F1225674	23C_tarta	M	100 +	Centenarians (101+)	Curieuse	16.02.2020
1236667F1225676	29C_tarta	M	100 +	Centenarians (101+)	Curieuse	17.02.2020
1236693F1225702	8_tarta	F	100 +	Centenarians (101+)	Parco Natura Viva	21.06.2021
1236671F1225680	ROGER_tarta	M	100 +	Centenarians (101+)	Parco Natura Viva	21.06.2021
1236709F1225718	BULBO_tarta	M	100 +	Centenarians (101+)	Parco Natura Viva	21.06.2021
1236694F1225703	BULBO2_tarta (discarded, same tortoise as 1236709F1225718)	M	100 +	Centenarians (101+)	Parco Natura Viva	21.06.2021
1236709F1225719	14C_tarta (discarded, few sequences obtained)	M	090-100	Elderly (71-100)	Curieuse	15.02.2020
