# Supplementary material for: Disentangling the gut microbiota of Aldabra giant tortoises of different ages and environments
Source: PeerJ. 2025 Jun 10;13:e19566. doi: 10.7717/peerj.19566 (PMC12164811; doi:10.7717/peerj.19566)
Supplement: Supplemental Information 2 [file peerj-13-19566-s002.xlsx]

## Sheet: Sheet 1
Table S2. Relative abundances of OTUs in the gut microbiota of Aldabra giant tortoises
ID	Sample name	Sex	Age	AgeGroup4	EnvironmentGroup5	SamplingDate	Kingdom	Phylum	Class	Order	Family	Genus	Species	ASV	Abundance
1236707F1225716	8BG_tarta	M	100 +	Centenarians (101+)	Botanical Garden	19.02.2020	Bacteria	Bacillota_A	Clostridia	Clostridiales	Clostridiaceae	Sarcina	Sarcina	ASV_ASV1	21.6495
1236696F1225705	20C_tarta	F	040-050	Adults (26-70)	Curieuse	16.02.2020	Bacteria	Bacillota_A	Clostridia	Clostridiales	Clostridiaceae	Sarcina	Sarcina	ASV_ASV1	21.1856
1236689F1225698	29F_tarta	Not determined	004-005	Juveniles (2-25)	Private Garden	2022	Bacteria	Bacillota_A	Clostridia	Clostridiales	Clostridiaceae	Sarcina	Sarcina	ASV_ASV1	18.6072
1236662F1225671	n2_tarta	M	070-080	Elderly (71-100)	Curieuse	14.02.2020	Bacteria	Bacteroidota	Bacteroidia	Bacteroidales				ASV_ASV7	17.7758
1236671F1225680	ROGER_tarta	M	100 +	Centenarians (101+)	Parco Natura Viva	21.06.2021	Bacteria	Bacillota_A	Clostridia	Clostridiales	Clostridiaceae	Sarcina	Sarcina	ASV_ASV1	16.5608
1236690F1225699	30F_tarta	Not determined	004-005	Juveniles (2-25)	Private Garden	2022	Bacteria	Bacillota	Bacilli	Bacillales	Planococcaceae			ASV_ASV91	15.3414
1236679F1225688	3N_tarta	Not determined	002-003	Juveniles (2-25)	Curieuse (Nursery)	17.02.2020	Bacteria	Bacteroidota	Bacteroidia	Bacteroidales				ASV_ASV4	14.7869
1236702F1225711	3BG_tarta	F	030-040	Adults (26-70)	Botanical Garden	19.02.2020	Bacteria	Bacillota_A	Clostridia	Clostridiales	Clostridiaceae	Sarcina	Sarcina	ASV_ASV1	14.4045
1236704F1225713	5BG_tarta	M	080-090	Elderly (71-100)	Botanical Garden	19.02.2020	Bacteria	Bacillota_A	Clostridia	Clostridiales	Clostridiaceae	Sarcina	Sarcina	ASV_ASV1	13.9665
1236690F1225699	30F_tarta	Not determined	004-005	Juveniles (2-25)	Private Garden	2022	Bacteria	Bacillota	Bacilli	Bacillales	Planococcaceae	Solibacillus	Solibacillus	ASV_ASV26	13.4037
1236673F1225682	n6_tarta	M	070-080	Elderly (71-100)	Curieuse	14.02.2020	Bacteria	Bacillota_A	Clostridia	Clostridiales	Clostridiaceae	Sarcina	Sarcina	ASV_ASV1	12.6229
1236705F1225714	6BG_tarta	M	040-050	Adults (26-70)	Botanical Garden	19.02.2020	Bacteria	Bacillota_A	Clostridia	Clostridiales	Clostridiaceae	Sarcina	Sarcina	ASV_ASV1	12.541
1236669F1225678	17C_tarta	M	060-070	Adults (26-70)	Curieuse	15.02.2020	Bacteria	Bacillota_A	Clostridia	Clostridiales	Clostridiaceae	Sarcina	Sarcina	ASV_ASV1	12.4848
1236669F1225678	17C_tarta	M	060-070	Adults (26-70)	Curieuse	15.02.2020	Bacteria	Bacillota	Bacilli	Staphylococcales	Staphylococcaceae	Staphylococcus	Staphylococcus	ASV_ASV27	12.4307
1236693F1225702	8_tarta	F	100 +	Centenarians (101+)	Parco Natura Viva	21.06.2021	Bacteria	Bacillota_A	Clostridia	Clostridiales	Clostridiaceae	Sarcina	Sarcina	ASV_ASV1	12.0792
1236709F1225718	BULBO_tarta	M	100 +	Centenarians (101+)	Parco Natura Viva	21.06.2021	Bacteria	Bacillota_A	Clostridia	Clostridiales	Clostridiaceae	Sarcina	Sarcina	ASV_ASV1	12.0639
1236700F1225709	1BG_tarta	F	030-040	Adults (26-70)	Botanical Garden	19.02.2020	Bacteria	Bacteroidota	Bacteroidia	Bacteroidales	UBA932	Coprenecus	Coprenecus	ASV_ASV3	11.9592
1236701F1225710	2BG_tarta	F	040-050	Adults (26-70)	Botanical Garden	19.02.2020	Bacteria	Bacteroidota	Bacteroidia	Bacteroidales	UBA932	Coprenecus	Coprenecus	ASV_ASV3	11.7397
1236691F1225700	31F_tarta	Not determined	004-005	Juveniles (2-25)	Private Garden	2022	Bacteria	Bacillota_A	Clostridia	Clostridiales	Clostridiaceae	Sarcina	Sarcina	ASV_ASV1	11.5424
1236659F1225668	28C_tarta	M	080-090	Elderly (71-100)	Curieuse	16.02.2020	Bacteria	Bacillota_A	Clostridia	Clostridiales	Clostridiaceae	Sarcina	Sarcina	ASV_ASV1	11.4781
1236703F1225712	4BG_tarta	M	030-040	Adults (26-70)	Botanical Garden	19.02.2020	Bacteria	Bacillota_A	Clostridia	Clostridiales	Clostridiaceae	Sarcina	Sarcina	ASV_ASV1	11.4244
1236698F1225707	22C_tarta	M	090-100	Elderly (71-100)	Curieuse	16.02.2020	Bacteria	Bacillota_A	Clostridia	Clostridiales	Clostridiaceae	Sarcina	Sarcina	ASV_ASV1	11.087
1236675F1225684	n9_tarta	M	070-080	Elderly (71-100)	Curieuse	15.02.2020	Bacteria	Bacillota	Bacilli	Staphylococcales	Staphylococcaceae	Mammaliicoccus	Mammaliicoccus	ASV_ASV85	10.9142
1236700F1225709	1BG_tarta	F	030-040	Adults (26-70)	Botanical Garden	19.02.2020	Bacteria	Bacillota_A	Clostridia	Clostridiales	Clostridiaceae	Sarcina	Sarcina	ASV_ASV1	10.9106
1236677F1225686	1N_tarta	Not determined	001-002	Juveniles (2-25)	Curieuse (Nursery)	17.02.2020	Bacteria	Bacillota	Bacilli	Bacillales	DSM-18226	Bacillus_BD	Bacillus_BD	ASV_ASV164	10.7512
1236664F1225673	12GH_tarta (=20C)	F	040-050	Adults (26-70)	Curieuse	15.02.2020	Bacteria	Bacteroidota	Bacteroidia	Bacteroidales				ASV_ASV13	10.7039
1236690F1225699	30F_tarta	Not determined	004-005	Juveniles (2-25)	Private Garden	2022	Bacteria	Bacillota_A	Clostridia	Clostridiales	Clostridiaceae	Sarcina	Sarcina	ASV_ASV1	10.6909
1236695F1225704	11_tarta	F	015 -	Juveniles (2-25)	Parco Natura Viva	21.06.2021	Bacteria	Bacillota_A	Clostridia	Clostridiales	Clostridiaceae	Clostridium	Clostridium	ASV_ASV8	10.6701
1236705F1225714	6BG_tarta	M	040-050	Adults (26-70)	Botanical Garden	19.02.2020	Bacteria	Bacillota_A	Clostridia	Clostridiales	Clostridiaceae			ASV_ASV11	10.6692
1236698F1225707	22C_tarta	M	090-100	Elderly (71-100)	Curieuse	16.02.2020	Bacteria	Bacteroidota	Bacteroidia	Bacteroidales				ASV_ASV7	10.6491
1236688F1225697	19F_tarta	F	005-006	Juveniles (2-25)	Botanical Garden	2022	Bacteria	Bacillota_A	Clostridia	Clostridiales	Clostridiaceae	Sarcina	Sarcina	ASV_ASV1	10.5963
1236703F1225712	4BG_tarta	M	030-040	Adults (26-70)	Botanical Garden	19.02.2020	Bacteria	Bacteroidota	Bacteroidia	Bacteroidales	UBA932	Coprenecus	Coprenecus	ASV_ASV3	10.4942
1236695F1225704	11_tarta	F	015 -	Juveniles (2-25)	Parco Natura Viva	21.06.2021	Bacteria	Bacillota_A	Clostridia	Clostridiales	Clostridiaceae	Sarcina	Sarcina	ASV_ASV1	10.456
1236686F1225695	17F_tarta	M	080-090	Elderly (71-100)	Botanical Garden	2022	Bacteria	Bacteroidota	Bacteroidia	Bacteroidales	UBA932			ASV_ASV83	10.4183
1236687F1225696	18F_tarta	F	040-050	Adults (26-70)	Botanical Garden	2022	Bacteria	Bacillota_A	Clostridia	Clostridiales	Clostridiaceae	Sarcina	Sarcina	ASV_ASV1	10.4144
1236660F1225669	30C_tarta	M	090-100	Elderly (71-100)	Curieuse	17.02.2020	Bacteria	Bacteroidota	Bacteroidia	Bacteroidales				ASV_ASV7	10.1909
1236674F1225683	n8_tarta	Not determined	004-005	Juveniles (2-25)	Curieuse (Nursery)	14.02.2020	Bacteria	Bacteroidota	Bacteroidia	Bacteroidales				ASV_ASV12	10.1426
1236697F1225706	21C_tarta	M	080-090	Elderly (71-100)	Curieuse	16.02.2020	Bacteria	Bacteroidota	Bacteroidia	Bacteroidales				ASV_ASV7	10.1111
1236668F1225677	22F_tarta	M	080-090	Elderly (71-100)	Curieuse	2022	Bacteria	Bacillota_A	Clostridia	Clostridiales	Clostridiaceae	Sarcina	Sarcina	ASV_ASV1	10.0343
1236682F1225691	25F_tarta	Not determined	005 -	Juveniles (2-25)	Curieuse (Nursery)	2022	Bacteria	Bacillota	Bacilli	Bacillales	DSM-1321	Bacillus_AD	Bacillus_AD	ASV_ASV6	9.96449
1236676F1225685	n10_tarta	M	090-100	Elderly (71-100)	Curieuse	15.02.2020	Bacteria	Bacillota	Bacilli	Staphylococcales	Staphylococcaceae	Staphylococcus	Staphylococcus	ASV_ASV27	9.90199
1236695F1225704	11_tarta	F	015 -	Juveniles (2-25)	Parco Natura Viva	21.06.2021	Bacteria	Bacillota_A	Clostridia	Lachnospirales	Lachnospiraceae			ASV_ASV2	9.88059
1236692F1225701	7_tarta	F	015 -	Juveniles (2-25)	Parco Natura Viva	21.06.2021	Bacteria	Bacillota_A	Clostridia	Clostridiales	Clostridiaceae	Sarcina	Sarcina	ASV_ASV1	9.66822
1236692F1225701	7_tarta	F	015 -	Juveniles (2-25)	Parco Natura Viva	21.06.2021	Bacteria	Bacillota_A	Clostridia	Lachnospirales	Lachnospiraceae			ASV_ASV2	9.58435
1236706F1225715	7BG_tarta	F	050-060	Adults (26-70)	Botanical Garden	19.02.2020	Bacteria	Bacteroidota	Bacteroidia	Bacteroidales	UBA932	Coprenecus	Coprenecus	ASV_ASV3	9.17367
1236661F1225670	9BG_tarta	M	090-100	Elderly (71-100)	Botanical Garden	18.02.2020	Bacteria	Bacillota_A	Clostridia	Clostridiales	Clostridiaceae	Sarcina	Sarcina	ASV_ASV1	9.02984
1236665F1225674	23C_tarta	M	100 +	Centenarians (101+)	Curieuse	16.02.2020	Bacteria	Bacteroidota	Bacteroidia	Bacteroidales				ASV_ASV4	8.98265
1236701F1225710	2BG_tarta	F	040-050	Adults (26-70)	Botanical Garden	19.02.2020	Bacteria	Bacillota_A	Clostridia	Clostridiales	Clostridiaceae	Sarcina	Sarcina	ASV_ASV1	8.97248
1236676F1225685	n10_tarta	M	090-100	Elderly (71-100)	Curieuse	15.02.2020	Bacteria	Bacillota_A	Clostridia	Clostridiales	Clostridiaceae	Sarcina	Sarcina	ASV_ASV1	8.90927
1236678F1225687	2N_tarta	Not determined	002-003	Juveniles (2-25)	Curieuse (Nursery)	17.02.2020	Bacteria	Bacillota	Bacilli	Staphylococcales	Staphylococcaceae	Staphylococcus	Staphylococcus	ASV_ASV27	8.50122
1236678F1225687	2N_tarta	Not determined	002-003	Juveniles (2-25)	Curieuse (Nursery)	17.02.2020	Bacteria	Bacillota_A	Clostridia	Lachnospirales	Lachnospiraceae			ASV_ASV2	8.47137
1236683F1225692	26_tarta	Not determined	001-002	Juveniles (2-25)	Curieuse (Nursery)	2022	Bacteria	Bacteroidota	Bacteroidia	Bacteroidales				ASV_ASV4	8.38034
1236708F1225717	15C_tarta	M	080-090	Elderly (71-100)	Curieuse	15.02.2020	Bacteria	Bacillota_A	Clostridia	Oscillospirales	Ruminococcaceae	HUN007	HUN007	ASV_ASV16	8.31496
1236693F1225702	8_tarta	F	100 +	Centenarians (101+)	Parco Natura Viva	21.06.2021	Bacteria	Bacillota_A	Clostridia	Lachnospirales	Lachnospiraceae			ASV_ASV2	8.28127
1236678F1225687	2N_tarta	Not determined	002-003	Juveniles (2-25)	Curieuse (Nursery)	17.02.2020	Bacteria	Bacteroidota	Bacteroidia	Bacteroidales				ASV_ASV4	8.10327
1236701F1225710	2BG_tarta	F	040-050	Adults (26-70)	Botanical Garden	19.02.2020	Bacteria	Bacillota_A	Clostridia	Clostridiales	Clostridiaceae			ASV_ASV11	8.00515
1236697F1225706	21C_tarta	M	080-090	Elderly (71-100)	Curieuse	16.02.2020	Bacteria	Bacteroidota	Bacteroidia	Bacteroidales	UBA932	Coprenecus	Coprenecus	ASV_ASV3	7.91625
1236678F1225687	2N_tarta	Not determined	002-003	Juveniles (2-25)	Curieuse (Nursery)	17.02.2020	Bacteria	Bacillota_A	Clostridia	Lachnospirales	Lachnospiraceae			ASV_ASV31	7.8844
1236678F1225687	2N_tarta	Not determined	002-003	Juveniles (2-25)	Curieuse (Nursery)	17.02.2020	Bacteria	Bacillota_A	Clostridia	Lachnospirales	Lachnospiraceae			ASV_ASV17	7.87942
1236659F1225668	28C_tarta	M	080-090	Elderly (71-100)	Curieuse	16.02.2020	Bacteria	Bacteroidota	Bacteroidia	Bacteroidales				ASV_ASV7	7.81363
1236670F1225679	4Na_tarta	Not determined	002-003	Juveniles (2-25)	Curieuse (Nursery)	17.02.2020	Bacteria	Pseudomonadota	Gammaproteobacteria	Pseudomonadales	Moraxellaceae	Acinetobacter	Acinetobacter	ASV_ASV63	7.61551
1236671F1225680	ROGER_tarta	M	100 +	Centenarians (101+)	Parco Natura Viva	21.06.2021	Bacteria	Bacillota_A	Clostridia	Clostridiales	Clostridiaceae	Clostridium	Clostridium	ASV_ASV8	7.56773
1236709F1225718	BULBO_tarta	M	100 +	Centenarians (101+)	Parco Natura Viva	21.06.2021	Bacteria	Bacillota_A	Clostridia	Clostridiales	Clostridiaceae	Clostridium	Clostridium	ASV_ASV8	7.4775
1236680F1225689	4N_tarta	Not determined	2	Juveniles (2-25)	Curieuse (Nursery)	17.02.2020	Bacteria	Pseudomonadota	Gammaproteobacteria	Pseudomonadales	Moraxellaceae	Acinetobacter	Acinetobacter	ASV_ASV63	7.34767
1236674F1225683	n8_tarta	Not determined	004-005	Juveniles (2-25)	Curieuse (Nursery)	14.02.2020	Bacteria							ASV_ASV24	7.14197
1236667F1225676	29C_tarta	M	100 +	Centenarians (101+)	Curieuse	17.02.2020	Bacteria	Bacteroidota	Bacteroidia	Bacteroidales				ASV_ASV4	7.03992
1236662F1225671	n2_tarta	M	070-080	Elderly (71-100)	Curieuse	14.02.2020	Bacteria	Bacillota	Bacilli					ASV_ASV190	6.96385
1236684F1225693	27_tarta	Not determined	001-002	Juveniles (2-25)	Curieuse (Nursery)	2022	Bacteria	Bacillota	Bacilli	Bacillales	DSM-1321	Bacillus_AD	Bacillus_AD	ASV_ASV6	6.73332
1236699F1225708	31C_tarta	Not determined	004-005	Juveniles (2-25)	Curieuse (Nursery)	17.02.2020	Bacteria	Bacillota	Bacilli	Bacillales	DSM-1321	Bacillus_AD	Bacillus_AD	ASV_ASV6	6.62377
1236657F1225666	�	F	030-040	Adults (26-70)	Curieuse	14.02.2020	Bacteria	Bacteroidota	Bacteroidia	Bacteroidales				ASV_ASV12	6.57705
1236679F1225688	3N_tarta	Not determined	002-003	Juveniles (2-25)	Curieuse (Nursery)	17.02.2020								ASV_ASV47	6.5145
1236685F1225694	16F_tarta	M	080-090	Elderly (71-100)	Botanical Garden	2022	Bacteria	Bacillota_A	Clostridia	Clostridiales	Clostridiaceae	Sarcina	Sarcina	ASV_ASV1	6.47788
1236680F1225689	4N_tarta	Not determined	2	Juveniles (2-25)	Curieuse (Nursery)	17.02.2020	Bacteria	Pseudomonadota	Gammaproteobacteria	Enterobacterales_A	Alteromonadaceae	Rheinheimera	Rheinheimera	ASV_ASV115	6.46953
1236663F1225672	19N_tarta	Not determined	004-005	Juveniles (2-25)	Curieuse (Nursery)	15.02.2020	Bacteria							ASV_ASV24	6.44938
1236709F1225718	BULBO_tarta	M	100 +	Centenarians (101+)	Parco Natura Viva	21.06.2021	Bacteria	Bacillota_A	Clostridia	Clostridiales	Clostridiaceae	Clostridium	Clostridium	ASV_ASV9	6.39768
1236672F1225681	10BG_tarta	M	040-050	Adults (26-70)	Botanical Garden	19.02.2020	Bacteria	Bacillota_A	Clostridia	Clostridiales	Clostridiaceae	Sarcina	Sarcina	ASV_ASV1	6.34939
1236709F1225718	BULBO_tarta	M	100 +	Centenarians (101+)	Parco Natura Viva	21.06.2021	Bacteria	Bacillota_A	Clostridia	Lachnospirales	Lachnospiraceae			ASV_ASV2	6.19448
1236671F1225680	ROGER_tarta	M	100 +	Centenarians (101+)	Parco Natura Viva	21.06.2021	Bacteria	Bacillota_A	Clostridia	Clostridiales	Clostridiaceae	Clostridium	Clostridium	ASV_ASV9	6.16544
1236691F1225700	31F_tarta	Not determined	004-005	Juveniles (2-25)	Private Garden	2022	Bacteria	Bacillota	Bacilli	Bacillales	Planococcaceae	Solibacillus	Solibacillus	ASV_ASV26	6.11457
1236658F1225667	24C_tarta	F	030-040	Adults (26-70)	Curieuse	16.02.2020	Bacteria	Bacteroidota	Bacteroidia	Bacteroidales				ASV_ASV4	6.07567
1236691F1225700	31F_tarta	Not determined	004-005	Juveniles (2-25)	Private Garden	2022	Bacteria	Bacillota_A	Clostridia	Clostridiales	Clostridiaceae	Clostridium	Clostridium	ASV_ASV9	6.03566
1236665F1225674	23C_tarta	M	100 +	Centenarians (101+)	Curieuse	16.02.2020	Bacteria	Bacillota_A	Clostridia	Clostridiales	Clostridiaceae	Sarcina	Sarcina	ASV_ASV1	5.94729
1236702F1225711	3BG_tarta	F	030-040	Adults (26-70)	Botanical Garden	19.02.2020	Bacteria	Bacillota_A	Clostridia	Clostridiales	Clostridiaceae			ASV_ASV11	5.86311
1236696F1225705	20C_tarta	F	040-050	Adults (26-70)	Curieuse	16.02.2020	Bacteria	Bacteroidota	Bacteroidia	Bacteroidales	UBA932	Bact-08	Bact-08	ASV_ASV5	5.84969
1236677F1225686	1N_tarta	Not determined	001-002	Juveniles (2-25)	Curieuse (Nursery)	17.02.2020	Bacteria	Pseudomonadota	Gammaproteobacteria	Pseudomonadales	Moraxellaceae	Acinetobacter	Acinetobacter	ASV_ASV96	5.80297
1236660F1225669	30C_tarta	M	090-100	Elderly (71-100)	Curieuse	17.02.2020	Bacteria	Bacillota_A	Clostridia	Oscillospirales	Ruminococcaceae	HUN007	HUN007	ASV_ASV16	5.79609
1236671F1225680	ROGER_tarta	M	100 +	Centenarians (101+)	Parco Natura Viva	21.06.2021	Bacteria	Bacillota_A	Clostridia	Lachnospirales	Lachnospiraceae			ASV_ASV2	5.67497
1236686F1225695	17F_tarta	M	080-090	Elderly (71-100)	Botanical Garden	2022	Bacteria	Bacteroidota	Bacteroidia	Bacteroidales				ASV_ASV72	5.66317
1236663F1225672	19N_tarta	Not determined	004-005	Juveniles (2-25)	Curieuse (Nursery)	15.02.2020	Bacteria	Bacteroidota	Bacteroidia	Bacteroidales				ASV_ASV4	5.65829
1236708F1225717	15C_tarta	M	080-090	Elderly (71-100)	Curieuse	15.02.2020	Bacteria	Bacteroidota	Bacteroidia	Bacteroidales				ASV_ASV7	5.65128
1236667F1225676	29C_tarta	M	100 +	Centenarians (101+)	Curieuse	17.02.2020	Bacteria	Bacteroidota	Bacteroidia	Bacteroidales				ASV_ASV7	5.61168
1236707F1225716	8BG_tarta	M	100 +	Centenarians (101+)	Botanical Garden	19.02.2020	Bacteria	Bacillota_A	Clostridia	Clostridiales	Clostridiaceae			ASV_ASV11	5.61063
1236693F1225702	8_tarta	F	100 +	Centenarians (101+)	Parco Natura Viva	21.06.2021	Bacteria	Bacillota_A	Clostridia	Lachnospirales				ASV_ASV19	5.59658
1236693F1225702	8_tarta	F	100 +	Centenarians (101+)	Parco Natura Viva	21.06.2021	Bacteria	Bacillota_A	Clostridia	Clostridiales	Clostridiaceae	Clostridium	Clostridium	ASV_ASV9	5.54356
1236682F1225691	25F_tarta	Not determined	005 -	Juveniles (2-25)	Curieuse (Nursery)	2022	Bacteria	Bacillota	Bacilli	Bacillales	Planococcaceae	Solibacillus	Solibacillus	ASV_ASV26	5.5303
1236695F1225704	11_tarta	F	015 -	Juveniles (2-25)	Parco Natura Viva	21.06.2021	Bacteria	Bacillota_A	Clostridia	Clostridiales	Clostridiaceae	Clostridium	Clostridium	ASV_ASV9	5.48922
1236673F1225682	n6_tarta	M	070-080	Elderly (71-100)	Curieuse	14.02.2020	Bacteria	Bacteroidota	Bacteroidia	Bacteroidales	UBA932	Bact-08	Bact-08	ASV_ASV5	5.46992
1236672F1225681	10BG_tarta	M	040-050	Adults (26-70)	Botanical Garden	19.02.2020	Bacteria	Bacteroidota	Bacteroidia	Bacteroidales	UBA932	Coprenecus	Coprenecus	ASV_ASV3	5.43116
1236663F1225672	19N_tarta	Not determined	004-005	Juveniles (2-25)	Curieuse (Nursery)	15.02.2020								ASV_ASV51	5.34494
1236690F1225699	30F_tarta	Not determined	004-005	Juveniles (2-25)	Private Garden	2022	Bacteria	Bacillota	Bacilli	Bacillales	DSM-1321	Bacillus_AD	Bacillus_AD	ASV_ASV6	5.2519
1236687F1225696	18F_tarta	F	040-050	Adults (26-70)	Botanical Garden	2022	Bacteria	Bacillota_A	Clostridia	Clostridiales	Clostridiaceae	Clostridium	Clostridium	ASV_ASV9	5.22947
1236680F1225689	4N_tarta	Not determined	2	Juveniles (2-25)	Curieuse (Nursery)	17.02.2020	Bacteria	Bacillota	Bacilli	Bacillales	DSM-1321	Bacillus_AD	Bacillus_AD	ASV_ASV6	5.16726
1236692F1225701	7_tarta	F	015 -	Juveniles (2-25)	Parco Natura Viva	21.06.2021	Bacteria	Bacillota_A	Clostridia	Clostridiales	Clostridiaceae	Clostridium	Clostridium	ASV_ASV8	5.16622
1236670F1225679	4Na_tarta	Not determined	002-003	Juveniles (2-25)	Curieuse (Nursery)	17.02.2020	Bacteria	Bacillota	Bacilli	Bacillales	DSM-1321	Bacillus_AD	Bacillus_AD	ASV_ASV6	5.12625
1236683F1225692	26_tarta	Not determined	001-002	Juveniles (2-25)	Curieuse (Nursery)	2022	Bacteria	Bacillota_A	Clostridia	Lachnospirales	Lachnospiraceae			ASV_ASV2	5.10194
1236703F1225712	4BG_tarta	M	030-040	Adults (26-70)	Botanical Garden	19.02.2020	Bacteria	Bacillota_A	Clostridia	Clostridiales	Clostridiaceae			ASV_ASV11	5.10174
1236676F1225685	n10_tarta	M	090-100	Elderly (71-100)	Curieuse	15.02.2020	Bacteria	Bacteroidota	Bacteroidia	Bacteroidales				ASV_ASV4	5.03895
1236688F1225697	19F_tarta	F	005-006	Juveniles (2-25)	Botanical Garden	2022	Bacteria	Bacillota_A	Clostridia	Clostridiales	Clostridiaceae	Inconstantimicrobium	Inconstantimicrobium	ASV_ASV38	5.02123
1236672F1225681	10BG_tarta	M	040-050	Adults (26-70)	Botanical Garden	19.02.2020	Bacteria	Bacillota_A	Clostridia	Clostridiales	Clostridiaceae			ASV_ASV11	4.98798
1236684F1225693	27_tarta	Not determined	001-002	Juveniles (2-25)	Curieuse (Nursery)	2022	Bacteria	Bacillota_A	Clostridia	Lachnospirales	Lachnospiraceae			ASV_ASV25	4.93877
1236677F1225686	1N_tarta	Not determined	001-002	Juveniles (2-25)	Curieuse (Nursery)	17.02.2020	Bacteria	Bacteroidota	Bacteroidia	Bacteroidales				ASV_ASV4	4.84705
1236674F1225683	n8_tarta	Not determined	004-005	Juveniles (2-25)	Curieuse (Nursery)	14.02.2020	Bacteria	Bacillota_A	Clostridia	Clostridiales	Clostridiaceae	Sarcina	Sarcina	ASV_ASV1	4.79851
1236702F1225711	3BG_tarta	F	030-040	Adults (26-70)	Botanical Garden	19.02.2020	Bacteria	Bacteroidota	Bacteroidia	Bacteroidales	UBA932	Bact-08	Bact-08	ASV_ASV5	4.77618
1236700F1225709	1BG_tarta	F	030-040	Adults (26-70)	Botanical Garden	19.02.2020	Bacteria	Bacillota_A	Clostridia	Clostridiales	Clostridiaceae			ASV_ASV11	4.76513
1236709F1225718	BULBO_tarta	M	100 +	Centenarians (101+)	Parco Natura Viva	21.06.2021	Bacteria	Bacillota_A	Clostridia	Clostridiales	Clostridiaceae	Clostridium	Clostridium	ASV_ASV49	4.74311
1236675F1225684	n9_tarta	M	070-080	Elderly (71-100)	Curieuse	15.02.2020	Bacteria	Bacillota_A	Clostridia	Clostridiales	Clostridiaceae	Sarcina	Sarcina	ASV_ASV1	4.71307
1236689F1225698	29F_tarta	Not determined	004-005	Juveniles (2-25)	Private Garden	2022	Bacteria	Bacillota_A	Clostridia	Clostridiales	Clostridiaceae	Sarcina	Sarcina	ASV_ASV141	4.69688
1236680F1225689	4N_tarta	Not determined	2	Juveniles (2-25)	Curieuse (Nursery)	17.02.2020	Bacteria	Bacillota	Bacilli	Bacillales	Planococcaceae	Solibacillus	Solibacillus	ASV_ASV26	4.68339
1236660F1225669	30C_tarta	M	090-100	Elderly (71-100)	Curieuse	17.02.2020	Bacteria	Bacillota	Bacilli	Bacillales	DSM-1321	Bacillus_AD	Bacillus_AD	ASV_ASV6	4.63687
1236670F1225679	4Na_tarta	Not determined	002-003	Juveniles (2-25)	Curieuse (Nursery)	17.02.2020	Bacteria	Bacillota	Bacilli	Bacillales	Planococcaceae	Solibacillus	Solibacillus	ASV_ASV26	4.63378
1236697F1225706	21C_tarta	M	080-090	Elderly (71-100)	Curieuse	16.02.2020	Bacteria	Bacillota_A	Clostridia	Clostridiales	Clostridiaceae	Sarcina	Sarcina	ASV_ASV1	4.62546
1236684F1225693	27_tarta	Not determined	001-002	Juveniles (2-25)	Curieuse (Nursery)	2022	Bacteria	Bacillota_A	Clostridia	Lachnospirales	Lachnospiraceae			ASV_ASV2	4.60385
1236662F1225671	n2_tarta	M	070-080	Elderly (71-100)	Curieuse	14.02.2020	Bacteria	Bacteroidota	Bacteroidia	Bacteroidales	UBA932	Bact-08	Bact-08	ASV_ASV5	4.48311
1236706F1225715	7BG_tarta	F	050-060	Adults (26-70)	Botanical Garden	19.02.2020	Bacteria	Bacillota_A	Clostridia	Clostridiales	Clostridiaceae			ASV_ASV11	4.45858
1236681F1225690	24F_tarta	M	030-040	Adults (26-70)	Curieuse	2022	Bacteria	Spirochaetota	Spirochaetia	Treponematales	Treponemataceae	Treponema_C	Treponema_C	ASV_ASV15	4.45551
1236679F1225688	3N_tarta	Not determined	002-003	Juveniles (2-25)	Curieuse (Nursery)	17.02.2020	Bacteria	Bacillota_A	Clostridia	Clostridiales	Clostridiaceae	Sarcina	Sarcina	ASV_ASV1	4.41959
1236705F1225714	6BG_tarta	M	040-050	Adults (26-70)	Botanical Garden	19.02.2020	Bacteria	Bacteroidota	Bacteroidia	Bacteroidales	UBA932	Coprenecus	Coprenecus	ASV_ASV3	4.41391
1236706F1225715	7BG_tarta	F	050-060	Adults (26-70)	Botanical Garden	19.02.2020	Bacteria	Bacillota_A	Clostridia	Clostridiales	Clostridiaceae	Sarcina	Sarcina	ASV_ASV1	4.37057
1236683F1225692	26_tarta	Not determined	001-002	Juveniles (2-25)	Curieuse (Nursery)	2022	Bacteria	Bacillota	Bacilli	Bacillales	DSM-1321	Bacillus_AD	Bacillus_AD	ASV_ASV6	4.36956
1236682F1225691	25F_tarta	Not determined	005 -	Juveniles (2-25)	Curieuse (Nursery)	2022	Bacteria	Bacteroidota	Bacteroidia	Bacteroidales				ASV_ASV12	4.31818
1236681F1225690	24F_tarta	M	030-040	Adults (26-70)	Curieuse	2022	Bacteria	Bacteroidota	Bacteroidia	Bacteroidales				ASV_ASV12	4.31541
1236698F1225707	22C_tarta	M	090-100	Elderly (71-100)	Curieuse	16.02.2020	Bacteria	Bacillota_A	Clostridia	Clostridiales	Clostridiaceae	Clostridium	Clostridium	ASV_ASV86	4.3051
1236682F1225691	25F_tarta	Not determined	005 -	Juveniles (2-25)	Curieuse (Nursery)	2022	Bacteria	Bacillota_A	Clostridia	Clostridiales	Clostridiaceae			ASV_ASV11	4.29924
1236683F1225692	26_tarta	Not determined	001-002	Juveniles (2-25)	Curieuse (Nursery)	2022	Bacteria							ASV_ASV24	4.29038
1236663F1225672	19N_tarta	Not determined	004-005	Juveniles (2-25)	Curieuse (Nursery)	15.02.2020	Bacteria	Bacteroidota	Bacteroidia	Bacteroidales				ASV_ASV12	4.28674
1236678F1225687	2N_tarta	Not determined	002-003	Juveniles (2-25)	Curieuse (Nursery)	17.02.2020	Bacteria	Bacillota_A	Clostridia	Clostridiales	Clostridiaceae	Sarcina	Sarcina	ASV_ASV1	4.27299
1236692F1225701	7_tarta	F	015 -	Juveniles (2-25)	Parco Natura Viva	21.06.2021	Bacteria	Bacillota_A	Clostridia	Clostridiales	Clostridiaceae	Clostridium	Clostridium	ASV_ASV9	4.26046
1236659F1225668	28C_tarta	M	080-090	Elderly (71-100)	Curieuse	16.02.2020	Bacteria	Bacteroidota	Bacteroidia	Bacteroidales	UBA932	Bact-08	Bact-08	ASV_ASV5	4.25541
1236667F1225676	29C_tarta	M	100 +	Centenarians (101+)	Curieuse	17.02.2020	Bacteria	Bacillota_A	Clostridia	Oscillospirales	Ruminococcaceae	HUN007	HUN007	ASV_ASV16	4.233
1236666F1225675	27C_tarta	M	080-090	Elderly (71-100)	Curieuse	16.02.2020	Bacteria	Bacillota	Bacilli	Bacillales	DSM-1321	Bacillus_AD	Bacillus_AD	ASV_ASV6	4.20895
1236687F1225696	18F_tarta	F	040-050	Adults (26-70)	Botanical Garden	2022	Bacteria	Bacillota_A	Clostridia	Clostridiales	Clostridiaceae	Clostridium	Clostridium	ASV_ASV8	4.20869
1236704F1225713	5BG_tarta	M	080-090	Elderly (71-100)	Botanical Garden	19.02.2020	Bacteria	Bacteroidota	Bacteroidia	Bacteroidales				ASV_ASV4	4.18635
1236677F1225686	1N_tarta	Not determined	001-002	Juveniles (2-25)	Curieuse (Nursery)	17.02.2020	Bacteria	Bacteroidota	Bacteroidia	Flavobacteriales	Flavobacteriaceae	Flavobacterium	Flavobacterium	ASV_ASV384	4.18354
1236677F1225686	1N_tarta	Not determined	001-002	Juveniles (2-25)	Curieuse (Nursery)	17.02.2020	Bacteria	Pseudomonadota	Gammaproteobacteria	Burkholderiales	Burkholderiaceae_B	Comamonas	Comamonas	ASV_ASV313	4.17791
1236661F1225670	9BG_tarta	M	090-100	Elderly (71-100)	Botanical Garden	18.02.2020	Bacteria	Bacteroidota	Bacteroidia	Bacteroidales				ASV_ASV181	4.17391
1236678F1225687	2N_tarta	Not determined	002-003	Juveniles (2-25)	Curieuse (Nursery)	17.02.2020	Bacteria	Bacillota_A	Clostridia	Lachnospirales	Lachnospiraceae			ASV_ASV14	4.16853
1236658F1225667	24C_tarta	F	030-040	Adults (26-70)	Curieuse	16.02.2020	Bacteria	Bacteroidota	Bacteroidia	Bacteroidales	UBA932	Coprenecus	Coprenecus	ASV_ASV3	4.15939
1236687F1225696	18F_tarta	F	040-050	Adults (26-70)	Botanical Garden	2022	Bacteria	Bacillota_A	Clostridia	Lachnospirales	Lachnospiraceae			ASV_ASV2	4.15603
1236701F1225710	2BG_tarta	F	040-050	Adults (26-70)	Botanical Garden	19.02.2020	Bacteria	Spirochaetota	Spirochaetia	Treponematales	Treponemataceae	Treponema_C	Treponema_C	ASV_ASV15	4.13285
1236702F1225711	3BG_tarta	F	030-040	Adults (26-70)	Botanical Garden	19.02.2020	Bacteria	Bacteroidota	Bacteroidia	Bacteroidales				ASV_ASV12	4.13035
1236691F1225700	31F_tarta	Not determined	004-005	Juveniles (2-25)	Private Garden	2022	Bacteria	Bacillota_A	Clostridia	Lachnospirales	Lachnospiraceae			ASV_ASV2	4.12899
1236666F1225675	27C_tarta	M	080-090	Elderly (71-100)	Curieuse	16.02.2020	Bacteria	Bacillota_A	Clostridia	Oscillospirales	Ruminococcaceae	HUN007	HUN007	ASV_ASV43	4.0673
1236681F1225690	24F_tarta	M	030-040	Adults (26-70)	Curieuse	2022	Bacteria	Bacillota_A	Clostridia	Clostridiales	Clostridiaceae	Sarcina	Sarcina	ASV_ASV1	4.06274
1236697F1225706	21C_tarta	M	080-090	Elderly (71-100)	Curieuse	16.02.2020	Bacteria							ASV_ASV73	4.03771
1236699F1225708	31C_tarta	Not determined	004-005	Juveniles (2-25)	Curieuse (Nursery)	17.02.2020	Bacteria	Bacillota_A	Clostridia	Lachnospirales	Lachnospiraceae			ASV_ASV14	4.01042
1236660F1225669	30C_tarta	M	090-100	Elderly (71-100)	Curieuse	17.02.2020	Bacteria	Bacillota_A	Clostridia	Clostridiales	Clostridiaceae	Sarcina	Sarcina	ASV_ASV1	3.99907
1236699F1225708	31C_tarta	Not determined	004-005	Juveniles (2-25)	Curieuse (Nursery)	17.02.2020								ASV_ASV51	3.98897
1236693F1225702	8_tarta	F	100 +	Centenarians (101+)	Parco Natura Viva	21.06.2021	Bacteria	Bacillota_A	Clostridia	Clostridiales	Clostridiaceae	Clostridium	Clostridium	ASV_ASV8	3.98728
1236708F1225717	15C_tarta	M	080-090	Elderly (71-100)	Curieuse	15.02.2020	Bacteria	Bacillota_A	Clostridia	Clostridiales	Clostridiaceae	Sarcina	Sarcina	ASV_ASV1	3.96917
1236672F1225681	10BG_tarta	M	040-050	Adults (26-70)	Botanical Garden	19.02.2020	Bacteria	Bacteroidota	Bacteroidia	Bacteroidales	UBA932	Bact-08	Bact-08	ASV_ASV5	3.95968
1236662F1225671	n2_tarta	M	070-080	Elderly (71-100)	Curieuse	14.02.2020	Bacteria	Bacillota_A	Clostridia	Clostridiales	Clostridiaceae	Clostridium	Clostridium	ASV_ASV308	3.89044
1236682F1225691	25F_tarta	Not determined	005 -	Juveniles (2-25)	Curieuse (Nursery)	2022	Bacteria	Bacillota	Bacilli	Bacillales	DSM-1321	Bacillus_AD	Bacillus_AD	ASV_ASV29	3.88968
1236675F1225684	n9_tarta	M	070-080	Elderly (71-100)	Curieuse	15.02.2020	Bacteria	Bacteroidota	Bacteroidia	Bacteroidales	UBA932	Bact-08	Bact-08	ASV_ASV5	3.8742
1236699F1225708	31C_tarta	Not determined	004-005	Juveniles (2-25)	Curieuse (Nursery)	17.02.2020	Bacteria	Bacillota	Bacilli	Bacillales	DSM-1321	Bacillus_AD	Bacillus_AD	ASV_ASV29	3.8511
1236670F1225679	4Na_tarta	Not determined	002-003	Juveniles (2-25)	Curieuse (Nursery)	17.02.2020	Bacteria	Pseudomonadota	Gammaproteobacteria	Enterobacterales_A	Alteromonadaceae	Rheinheimera	Rheinheimera	ASV_ASV115	3.82566
1236684F1225693	27_tarta	Not determined	001-002	Juveniles (2-25)	Curieuse (Nursery)	2022	Bacteria	Bacillota_A	Clostridia	Lachnospirales	Lachnospiraceae			ASV_ASV93	3.82404
1236699F1225708	31C_tarta	Not determined	004-005	Juveniles (2-25)	Curieuse (Nursery)	17.02.2020	Bacteria	Bacteroidota	Bacteroidia	Bacteroidales				ASV_ASV12	3.82047
1236698F1225707	22C_tarta	M	090-100	Elderly (71-100)	Curieuse	16.02.2020	Bacteria	Bacteroidota	Bacteroidia	Bacteroidales	UBA932	Coprenecus	Coprenecus	ASV_ASV3	3.81376
1236709F1225718	BULBO_tarta	M	100 +	Centenarians (101+)	Parco Natura Viva	21.06.2021	Bacteria	Bacillota_A	Clostridia	Lachnospirales				ASV_ASV19	3.80842
1236698F1225707	22C_tarta	M	090-100	Elderly (71-100)	Curieuse	16.02.2020	Bacteria	Bacillota_A	Clostridia	Clostridiales	Clostridiaceae	Clostridium	Clostridium	ASV_ASV68	3.80039
1236679F1225688	3N_tarta	Not determined	002-003	Juveniles (2-25)	Curieuse (Nursery)	17.02.2020	Bacteria	Bacillota_A	Clostridia	Lachnospirales	Lachnospiraceae			ASV_ASV2	3.78385
1236691F1225700	31F_tarta	Not determined	004-005	Juveniles (2-25)	Private Garden	2022	Bacteria	Bacillota_A	Clostridia	Clostridiales	Clostridiaceae	Clostridium	Clostridium	ASV_ASV8	3.76642
1236690F1225699	30F_tarta	Not determined	004-005	Juveniles (2-25)	Private Garden	2022	Bacteria	Bacillota	Bacilli	Bacillales	DSM-1321	Bacillus_AD	Bacillus_AD	ASV_ASV35	3.75518
1236702F1225711	3BG_tarta	F	030-040	Adults (26-70)	Botanical Garden	19.02.2020	Bacteria	Bacteroidota	Bacteroidia	Bacteroidales	Bacteroidaceae	43-108	43-108	ASV_ASV53	3.72301
1236689F1225698	29F_tarta	Not determined	004-005	Juveniles (2-25)	Private Garden	2022	Bacteria	Campylobacterota	Campylobacteria	Campylobacterales	Campylobacteraceae	Campylobacter	Campylobacter	ASV_ASV149	3.7204
1236698F1225707	22C_tarta	M	090-100	Elderly (71-100)	Curieuse	16.02.2020	Bacteria	Bacillota_A	Clostridia	Clostridiales	Clostridiaceae	Clostridium	Clostridium	ASV_ASV36	3.71348
1236665F1225674	23C_tarta	M	100 +	Centenarians (101+)	Curieuse	16.02.2020	Bacteria	Bacteroidota	Bacteroidia	Bacteroidales	UBA932	Coprenecus	Coprenecus	ASV_ASV3	3.70641
1236692F1225701	7_tarta	F	015 -	Juveniles (2-25)	Parco Natura Viva	21.06.2021	Bacteria	Bacteroidota	Bacteroidia	Bacteroidales				ASV_ASV4	3.69352
1236681F1225690	24F_tarta	M	030-040	Adults (26-70)	Curieuse	2022	Bacteria	Bacillota_A	Clostridia	Clostridiales	Clostridiaceae	Clostridium	Clostridium	ASV_ASV20	3.67748
1236671F1225680	ROGER_tarta	M	100 +	Centenarians (101+)	Parco Natura Viva	21.06.2021	Bacteria	Bacillota	Bacilli	Bacillales	DSM-1321	Bacillus_AD	Bacillus_AD	ASV_ASV6	3.65384
1236699F1225708	31C_tarta	Not determined	004-005	Juveniles (2-25)	Curieuse (Nursery)	17.02.2020	Bacteria	Bacillota_A	Clostridia	Clostridiales	Clostridiaceae	Sarcina	Sarcina	ASV_ASV1	3.61826
1236686F1225695	17F_tarta	M	080-090	Elderly (71-100)	Botanical Garden	2022	Bacteria	Bacillota_A	Clostridia	Clostridiales	Clostridiaceae	Clostridium	Clostridium	ASV_ASV9	3.61178
1236692F1225701	7_tarta	F	015 -	Juveniles (2-25)	Parco Natura Viva	21.06.2021	Bacteria	Bacillota_A	Clostridia	Lachnospirales				ASV_ASV19	3.5761
1236690F1225699	30F_tarta	Not determined	004-005	Juveniles (2-25)	Private Garden	2022	Bacteria	Bacillota_A	Clostridia	Clostridiales	Clostridiaceae	Clostridium	Clostridium	ASV_ASV9	3.55472
1236677F1225686	1N_tarta	Not determined	001-002	Juveniles (2-25)	Curieuse (Nursery)	17.02.2020								ASV_ASV47	3.53689
1236667F1225676	29C_tarta	M	100 +	Centenarians (101+)	Curieuse	17.02.2020	Bacteria	Bacteroidota	Bacteroidia	Bacteroidales	UBA932	Coprenecus	Coprenecus	ASV_ASV3	3.52858
1236670F1225679	4Na_tarta	Not determined	002-003	Juveniles (2-25)	Curieuse (Nursery)	17.02.2020	Bacteria	Pseudomonadota	Gammaproteobacteria	Burkholderiales	Burkholderiaceae_B	Comamonas	Comamonas	ASV_ASV161	3.51674
1236687F1225696	18F_tarta	F	040-050	Adults (26-70)	Botanical Garden	2022	Bacteria	Bacteroidota	Bacteroidia	Bacteroidales				ASV_ASV12	3.50387
1236674F1225683	n8_tarta	Not determined	004-005	Juveniles (2-25)	Curieuse (Nursery)	14.02.2020								ASV_ASV52	3.50072
1236688F1225697	19F_tarta	F	005-006	Juveniles (2-25)	Botanical Garden	2022								ASV_ASV112	3.50009
1236687F1225696	18F_tarta	F	040-050	Adults (26-70)	Botanical Garden	2022	RS_GCF_001729965.1~NZ_JRWK01000030.1 Archaea	Methanobacteriota	Methanobacteria	Methanobacteriales	Methanobacteriaceae	Methanosphaera	Methanosphaera sp001729965 [location=1..1480] [ssu_len=1480] [contig_len=1498]	ASV_ASV41	3.47551
1236686F1225695	17F_tarta	M	080-090	Elderly (71-100)	Botanical Garden	2022	Bacteria	Bacteroidota	Bacteroidia	Bacteroidales	WCHB1-69	UBA5429	UBA5429	ASV_ASV23	3.43019
1236686F1225695	17F_tarta	M	080-090	Elderly (71-100)	Botanical Garden	2022	Bacteria	Bacillota_A	Clostridia	Clostridiales	Clostridiaceae	Clostridium	Clostridium	ASV_ASV8	3.41673
1236688F1225697	19F_tarta	F	005-006	Juveniles (2-25)	Botanical Garden	2022	Bacteria	Bacillota_A	Clostridia	Oscillospirales	Ethanoligenenaceae	Ruminiclostridium_D	Ruminiclostridium_D	ASV_ASV273	3.38564
1236677F1225686	1N_tarta	Not determined	001-002	Juveniles (2-25)	Curieuse (Nursery)	17.02.2020	Bacteria	Bacillota	Bacilli	Bacillales				ASV_ASV456	3.35695
1236667F1225676	29C_tarta	M	100 +	Centenarians (101+)	Curieuse	17.02.2020	Bacteria	Bacillota_A	Clostridia	Clostridiales	Clostridiaceae	Sarcina	Sarcina	ASV_ASV1	3.33685
1236692F1225701	7_tarta	F	015 -	Juveniles (2-25)	Parco Natura Viva	21.06.2021								ASV_ASV34	3.30437
1236658F1225667	24C_tarta	F	030-040	Adults (26-70)	Curieuse	16.02.2020	Bacteria	Bacillota_A	Clostridia	Clostridiales	Clostridiaceae	Sarcina	Sarcina	ASV_ASV1	3.29975
1236657F1225666	�	F	030-040	Adults (26-70)	Curieuse	14.02.2020	Bacteria	Bacillota_A	Clostridia	Clostridiales	Clostridiaceae	Sarcina	Sarcina	ASV_ASV1	3.27146
1236663F1225672	19N_tarta	Not determined	004-005	Juveniles (2-25)	Curieuse (Nursery)	15.02.2020	Bacteria	Bacillota_A	Clostridia	Clostridiales	Clostridiaceae	Sarcina	Sarcina	ASV_ASV1	3.26964
1236686F1225695	17F_tarta	M	080-090	Elderly (71-100)	Botanical Garden	2022	Bacteria	Bacillota_A	Clostridia	Clostridiales	Clostridiaceae	Sarcina	Sarcina	ASV_ASV1	3.25868
1236693F1225702	8_tarta	F	100 +	Centenarians (101+)	Parco Natura Viva	21.06.2021	Bacteria	Pseudomonadota	Gammaproteobacteria	Pseudomonadales	Moraxellaceae	Acinetobacter	Acinetobacter	ASV_ASV96	3.25268
1236686F1225695	17F_tarta	M	080-090	Elderly (71-100)	Botanical Garden	2022	Bacteria	Bacteroidota	Bacteroidia	Bacteroidales	UBA932			ASV_ASV56	3.22841
1236695F1225704	11_tarta	F	015 -	Juveniles (2-25)	Parco Natura Viva	21.06.2021	Bacteria	Bacillota_A	Clostridia	Lachnospirales				ASV_ASV19	3.21694
1236671F1225680	ROGER_tarta	M	100 +	Centenarians (101+)	Parco Natura Viva	21.06.2021	Bacteria	Bacillota_A	Clostridia	Clostridiales	Clostridiaceae	Clostridium	Clostridium	ASV_ASV49	3.193
1236695F1225704	11_tarta	F	015 -	Juveniles (2-25)	Parco Natura Viva	21.06.2021	Bacteria	Bacillota_A	Clostridia	Clostridiales	Clostridiaceae	Clostridium	Clostridium	ASV_ASV32	3.17569
1236697F1225706	21C_tarta	M	080-090	Elderly (71-100)	Curieuse	16.02.2020	Bacteria	Bacteroidota	Bacteroidia	Bacteroidales				ASV_ASV4	3.1714
1236682F1225691	25F_tarta	Not determined	005 -	Juveniles (2-25)	Curieuse (Nursery)	2022	Bacteria	Bacillota_A	Clostridia	Clostridiales	Clostridiaceae	Sarcina	Sarcina	ASV_ASV1	3.16998
1236691F1225700	31F_tarta	Not determined	004-005	Juveniles (2-25)	Private Garden	2022	Bacteria	Bacillota	Bacilli	Bacillales	Planococcaceae			ASV_ASV91	3.15006
1236708F1225717	15C_tarta	M	080-090	Elderly (71-100)	Curieuse	15.02.2020	Bacteria	Bacteroidota	Bacteroidia	Bacteroidales				ASV_ASV4	3.13592
1236676F1225685	n10_tarta	M	090-100	Elderly (71-100)	Curieuse	15.02.2020	Bacteria	Bacillota_A	Clostridia	Oscillospirales	Ruminococcaceae	HUN007	HUN007	ASV_ASV16	3.12893
1236690F1225699	30F_tarta	Not determined	004-005	Juveniles (2-25)	Private Garden	2022	Bacteria	Bacillota_A	Clostridia	Lachnospirales	Lachnospiraceae			ASV_ASV2	3.12709
1236679F1225688	3N_tarta	Not determined	002-003	Juveniles (2-25)	Curieuse (Nursery)	17.02.2020	Bacteria	Bacillota_A	Clostridia	Lachnospirales	Lachnospiraceae			ASV_ASV17	3.12512
1236661F1225670	9BG_tarta	M	090-100	Elderly (71-100)	Botanical Garden	18.02.2020	Bacteria	Bacteroidota	Bacteroidia	Bacteroidales	UBA932	Bact-08	Bact-08	ASV_ASV5	3.11338
1236666F1225675	27C_tarta	M	080-090	Elderly (71-100)	Curieuse	16.02.2020	Bacteria	Spirochaetota	Spirochaetia	Treponematales	Treponemataceae	Treponema_C	Treponema_C	ASV_ASV15	3.08928
1236690F1225699	30F_tarta	Not determined	004-005	Juveniles (2-25)	Private Garden	2022	Bacteria	Bacillota	Bacilli	Bacillales	Planococcaceae	Lysinibacillus	Lysinibacillus	ASV_ASV269	3.07363
1236661F1225670	9BG_tarta	M	090-100	Elderly (71-100)	Botanical Garden	18.02.2020	Bacteria	Bacteroidota	Bacteroidia	Bacteroidales				ASV_ASV72	3.06564
1236684F1225693	27_tarta	Not determined	001-002	Juveniles (2-25)	Curieuse (Nursery)	2022	Bacteria	Bacillota_A	Clostridia	Lachnospirales	Lachnospiraceae			ASV_ASV17	3.04924
1236666F1225675	27C_tarta	M	080-090	Elderly (71-100)	Curieuse	16.02.2020	Bacteria	Bacillota_A	Clostridia	Clostridiales	Clostridiaceae	Sarcina	Sarcina	ASV_ASV1	3.04465
1236683F1225692	26_tarta	Not determined	001-002	Juveniles (2-25)	Curieuse (Nursery)	2022	Bacteria	Bacillota_A	Clostridia	Lachnospirales	Lachnospiraceae			ASV_ASV17	2.99881
1236693F1225702	8_tarta	F	100 +	Centenarians (101+)	Parco Natura Viva	21.06.2021	Bacteria	Bacillota_A	Clostridia	Peptostreptococcales	Peptostreptococcaceae	Terrisporobacter	Terrisporobacter	ASV_ASV10	2.99519
1236665F1225674	23C_tarta	M	100 +	Centenarians (101+)	Curieuse	16.02.2020	Bacteria	Bacillota_A	Clostridia	Clostridiales	Clostridiaceae	Clostridium	Clostridium	ASV_ASV20	2.98668
1236664F1225673	12GH_tarta (=20C)	F	040-050	Adults (26-70)	Curieuse	15.02.2020	Bacteria	Bacteroidota	Bacteroidia	Bacteroidales	WCHB1-69	UBA5429	UBA5429	ASV_ASV21	2.9837
1236676F1225685	n10_tarta	M	090-100	Elderly (71-100)	Curieuse	15.02.2020	Bacteria	Bacteroidota	Bacteroidia	Bacteroidales	UBA932	Coprenecus	Coprenecus	ASV_ASV3	2.97814
1236661F1225670	9BG_tarta	M	090-100	Elderly (71-100)	Botanical Garden	18.02.2020	Bacteria	Bacteroidota	Bacteroidia	Bacteroidales				ASV_ASV12	2.97698
1236709F1225718	BULBO_tarta	M	100 +	Centenarians (101+)	Parco Natura Viva	21.06.2021	Bacteria	Bacillota_A	Clostridia	Clostridiales	Clostridiaceae	Clostridium	Clostridium	ASV_ASV32	2.97242
1236692F1225701	7_tarta	F	015 -	Juveniles (2-25)	Parco Natura Viva	21.06.2021	Bacteria	Bacteroidota	Bacteroidia	Bacteroidales	UBA932	Bact-08	Bact-08	ASV_ASV5	2.95548
1236692F1225701	7_tarta	F	015 -	Juveniles (2-25)	Parco Natura Viva	21.06.2021	Bacteria	Bacillota_A	Clostridia	Lachnospirales	Lachnospiraceae			ASV_ASV45	2.94542
1236657F1225666	�	F	030-040	Adults (26-70)	Curieuse	14.02.2020	Bacteria	Bacteroidota	Bacteroidia	Bacteroidales	UBA932	Coprenecus	Coprenecus	ASV_ASV3	2.92226
1236683F1225692	26_tarta	Not determined	001-002	Juveniles (2-25)	Curieuse (Nursery)	2022	Bacteria	Bacillota_A	Clostridia	Lachnospirales	Lachnospiraceae			ASV_ASV25	2.91221
1236695F1225704	11_tarta	F	015 -	Juveniles (2-25)	Parco Natura Viva	21.06.2021	Bacteria	Bacteroidota	Bacteroidia	Bacteroidales	WCHB1-69	UBA5429	UBA5429	ASV_ASV18	2.91056
1236673F1225682	n6_tarta	M	070-080	Elderly (71-100)	Curieuse	14.02.2020	Bacteria	Bacillota_A	Clostridia	Peptostreptococcales	Peptostreptococcaceae	Terrisporobacter	Terrisporobacter	ASV_ASV10	2.90893
1236668F1225677	22F_tarta	M	080-090	Elderly (71-100)	Curieuse	2022	Bacteria	Bacteroidota	Bacteroidia	Bacteroidales	WCHB1-69	UBA5429	UBA5429	ASV_ASV23	2.8913
1236698F1225707	22C_tarta	M	090-100	Elderly (71-100)	Curieuse	16.02.2020	Bacteria	Bacillota_A	Clostridia	Clostridiales	Clostridiaceae	Clostridium	Clostridium	ASV_ASV44	2.89124
1236677F1225686	1N_tarta	Not determined	001-002	Juveniles (2-25)	Curieuse (Nursery)	17.02.2020	Bacteria	Bacillota	Bacilli	Bacillales	DSM-18226	Bacillus_BD	Bacillus_BD	ASV_ASV504	2.89024
1236676F1225685	n10_tarta	M	090-100	Elderly (71-100)	Curieuse	15.02.2020	Bacteria	Bacteroidota	Bacteroidia	Bacteroidales				ASV_ASV7	2.89017
1236662F1225671	n2_tarta	M	070-080	Elderly (71-100)	Curieuse	14.02.2020	Bacteria	Spirochaetota	GWE2-31-10	GWE2-31-10	GWE2-31-10	RGIG8597	RGIG8597	ASV_ASV114	2.87867
1236679F1225688	3N_tarta	Not determined	002-003	Juveniles (2-25)	Curieuse (Nursery)	17.02.2020								ASV_ASV82	2.86469
1236687F1225696	18F_tarta	F	040-050	Adults (26-70)	Botanical Garden	2022	Bacteria	Bacillota_A	Clostridia	Lachnospirales	Lachnospiraceae			ASV_ASV31	2.8436
1236692F1225701	7_tarta	F	015 -	Juveniles (2-25)	Parco Natura Viva	21.06.2021	Bacteria	Bacillota_A	Clostridia	Clostridiales	Clostridiaceae	Clostridium	Clostridium	ASV_ASV32	2.82465
1236664F1225673	12GH_tarta (=20C)	F	040-050	Adults (26-70)	Curieuse	15.02.2020	Bacteria	Bacteroidota	Bacteroidia	Bacteroidales	WCHB1-69	UBA5429	UBA5429	ASV_ASV18	2.82204
1236684F1225693	27_tarta	Not determined	001-002	Juveniles (2-25)	Curieuse (Nursery)	2022	Bacteria	Bacillota_A	Clostridia	Lachnospirales	Lachnospiraceae			ASV_ASV110	2.8143
1236686F1225695	17F_tarta	M	080-090	Elderly (71-100)	Botanical Garden	2022	Bacteria	Bacteroidota	Bacteroidia	Bacteroidales	Bacteroidaceae			ASV_ASV60	2.81141
1236680F1225689	4N_tarta	Not determined	2	Juveniles (2-25)	Curieuse (Nursery)	17.02.2020	Bacteria	Pseudomonadota	Gammaproteobacteria	Pseudomonadales	Moraxellaceae	Acinetobacter	Acinetobacter	ASV_ASV143	2.80765
1236677F1225686	1N_tarta	Not determined	001-002	Juveniles (2-25)	Curieuse (Nursery)	17.02.2020	Bacteria	Bacillota	Bacilli					ASV_ASV79	2.80027
1236666F1225675	27C_tarta	M	080-090	Elderly (71-100)	Curieuse	16.02.2020	Bacteria	Bacillota	Bacilli	Bacillales	DSM-1321	Bacillus_AD	Bacillus_AD	ASV_ASV29	2.79627
1236696F1225705	20C_tarta	F	040-050	Adults (26-70)	Curieuse	16.02.2020								ASV_ASV34	2.7932
1236693F1225702	8_tarta	F	100 +	Centenarians (101+)	Parco Natura Viva	21.06.2021	Bacteria	Bacillota_A	Clostridia	Lachnospirales	Lachnospiraceae			ASV_ASV45	2.79072
1236666F1225675	27C_tarta	M	080-090	Elderly (71-100)	Curieuse	16.02.2020	Bacteria	Bacillota	Bacilli	Bacillales	DSM-1321	Bacillus_AD	Bacillus_AD	ASV_ASV35	2.78074
1236672F1225681	10BG_tarta	M	040-050	Adults (26-70)	Botanical Garden	19.02.2020	Bacteria	Bacteroidota	Bacteroidia	Bacteroidales	UBA932			ASV_ASV56	2.76048
1236680F1225689	4N_tarta	Not determined	2	Juveniles (2-25)	Curieuse (Nursery)	17.02.2020	Bacteria	Bacteroidota	Bacteroidia	Bacteroidales				ASV_ASV4	2.75986
1236704F1225713	5BG_tarta	M	080-090	Elderly (71-100)	Botanical Garden	19.02.2020	Bacteria	Spirochaetota	Spirochaetia					ASV_ASV59	2.73065
1236659F1225668	28C_tarta	M	080-090	Elderly (71-100)	Curieuse	16.02.2020	Bacteria	Bacillota_A	Clostridia	Oscillospirales	Ruminococcaceae	HUN007	HUN007	ASV_ASV16	2.72712
1236662F1225671	n2_tarta	M	070-080	Elderly (71-100)	Curieuse	14.02.2020	Bacteria	Bacillota_A	Clostridia	Clostridiales	Clostridiaceae	Sarcina	Sarcina	ASV_ASV1	2.72204
1236662F1225671	n2_tarta	M	070-080	Elderly (71-100)	Curieuse	14.02.2020	Bacteria	Bacteroidota	Bacteroidia	Bacteroidales	UBA932	Coprenecus	Coprenecus	ASV_ASV3	2.71781
1236696F1225705	20C_tarta	F	040-050	Adults (26-70)	Curieuse	16.02.2020	Bacteria	Bacteroidota	Bacteroidia	Bacteroidales				ASV_ASV7	2.71504
1236701F1225710	2BG_tarta	F	040-050	Adults (26-70)	Botanical Garden	19.02.2020	Bacteria	Bacteroidota	Bacteroidia	Bacteroidales				ASV_ASV4	2.71031
1236691F1225700	31F_tarta	Not determined	004-005	Juveniles (2-25)	Private Garden	2022	Bacteria	Bacillota_A	Clostridia	Lachnospirales				ASV_ASV19	2.70645
1236671F1225680	ROGER_tarta	M	100 +	Centenarians (101+)	Parco Natura Viva	21.06.2021	Bacteria	Bacillota_A	Clostridia	Clostridiales	Clostridiaceae	Clostridium	Clostridium	ASV_ASV32	2.70582
1236687F1225696	18F_tarta	F	040-050	Adults (26-70)	Botanical Garden	2022	Bacteria	Bacillota_A	Clostridia	Clostridiales	Clostridiaceae	Clostridium	Clostridium	ASV_ASV64	2.68967
1236709F1225718	BULBO_tarta	M	100 +	Centenarians (101+)	Parco Natura Viva	21.06.2021	Bacteria	Bacillota_A	Clostridia	Clostridiales	Clostridiaceae	Clostridium	Clostridium	ASV_ASV42	2.68795
1236671F1225680	ROGER_tarta	M	100 +	Centenarians (101+)	Parco Natura Viva	21.06.2021	Bacteria	Bacillota_A	Clostridia	Lachnospirales				ASV_ASV19	2.68607
1236704F1225713	5BG_tarta	M	080-090	Elderly (71-100)	Botanical Garden	19.02.2020	Bacteria	Bacteroidota	Bacteroidia	Bacteroidales				ASV_ASV239	2.6728
1236685F1225694	16F_tarta	M	080-090	Elderly (71-100)	Botanical Garden	2022	Bacteria	Bacillota_A	Clostridia	Clostridiales	Clostridiaceae	Clostridium	Clostridium	ASV_ASV9	2.67067
1236662F1225671	n2_tarta	M	070-080	Elderly (71-100)	Curieuse	14.02.2020	Bacteria	Bacteroidota	Bacteroidia	Bacteroidales	Bacteroidaceae			ASV_ASV60	2.66701
1236697F1225706	21C_tarta	M	080-090	Elderly (71-100)	Curieuse	16.02.2020	Bacteria	Bacillota_A	Clostridia	Oscillospirales	Ruminococcaceae	HUN007	HUN007	ASV_ASV16	2.6663
1236680F1225689	4N_tarta	Not determined	2	Juveniles (2-25)	Curieuse (Nursery)	17.02.2020	Bacteria	Pseudomonadota	Gammaproteobacteria	Burkholderiales	Burkholderiaceae_B	Comamonas	Comamonas	ASV_ASV161	2.66428
1236705F1225714	6BG_tarta	M	040-050	Adults (26-70)	Botanical Garden	19.02.2020	Bacteria	Bacteroidota	Bacteroidia	Bacteroidales	UBA932	Bact-08	Bact-08	ASV_ASV5	2.65376
1236695F1225704	11_tarta	F	015 -	Juveniles (2-25)	Parco Natura Viva	21.06.2021	Bacteria	Bacteroidota	Bacteroidia	Bacteroidales	WCHB1-69	UBA5429	UBA5429	ASV_ASV21	2.64347
1236691F1225700	31F_tarta	Not determined	004-005	Juveniles (2-25)	Private Garden	2022	Bacteria	Bacillota_A	Clostridia	Clostridiales	Clostridiaceae	Inconstantimicrobium	Inconstantimicrobium	ASV_ASV38	2.64247
1236689F1225698	29F_tarta	Not determined	004-005	Juveniles (2-25)	Private Garden	2022	Bacteria	Bacillota_B	Desulfotomaculia	Desulfotomaculales				ASV_ASV97	2.63314
1236665F1225674	23C_tarta	M	100 +	Centenarians (101+)	Curieuse	16.02.2020	Bacteria	Bacteroidota	Bacteroidia	Bacteroidales				ASV_ASV13	2.63204
1236699F1225708	31C_tarta	Not determined	004-005	Juveniles (2-25)	Curieuse (Nursery)	17.02.2020	Bacteria	Bacteroidota	Bacteroidia	Bacteroidales	UBA932	Coprenecus	Coprenecus	ASV_ASV3	2.63174
1236684F1225693	27_tarta	Not determined	001-002	Juveniles (2-25)	Curieuse (Nursery)	2022	Bacteria	Bacteroidota	Bacteroidia	Bacteroidales				ASV_ASV12	2.62934
1236699F1225708	31C_tarta	Not determined	004-005	Juveniles (2-25)	Curieuse (Nursery)	17.02.2020	Bacteria	Bacillota_A	Clostridia	Lachnospirales	Lachnospiraceae			ASV_ASV17	2.62868
1236703F1225712	4BG_tarta	M	030-040	Adults (26-70)	Botanical Garden	19.02.2020	Bacteria	Spirochaetota	Spirochaetia	Treponematales	Treponemataceae	Treponema_C	Treponema_C	ASV_ASV15	2.62597
1236700F1225709	1BG_tarta	F	030-040	Adults (26-70)	Botanical Garden	19.02.2020	Bacteria	Bacteroidota	Bacteroidia	Bacteroidales	UBA932	Bact-08	Bact-08	ASV_ASV5	2.6251
1236693F1225702	8_tarta	F	100 +	Centenarians (101+)	Parco Natura Viva	21.06.2021	Bacteria	Bacillota_A	Clostridia	Clostridiales	Clostridiaceae	Clostridium	Clostridium	ASV_ASV42	2.62032
1236685F1225694	16F_tarta	M	080-090	Elderly (71-100)	Botanical Garden	2022	Bacteria	Bacillota_A	Clostridia	Lachnospirales	Lachnospiraceae			ASV_ASV2	2.59529
1236679F1225688	3N_tarta	Not determined	002-003	Juveniles (2-25)	Curieuse (Nursery)	17.02.2020	Bacteria	Verrucomicrobiota	Verrucomicrobiae	Verrucomicrobiales				ASV_ASV80	2.59278
1236670F1225679	4Na_tarta	Not determined	002-003	Juveniles (2-25)	Curieuse (Nursery)	17.02.2020	Bacteria	Pseudomonadota	Gammaproteobacteria	Pseudomonadales	Moraxellaceae	Acinetobacter	Acinetobacter	ASV_ASV143	2.58327
1236673F1225682	n6_tarta	M	070-080	Elderly (71-100)	Curieuse	14.02.2020	Bacteria	Bacteroidota	Bacteroidia	Bacteroidales	WCHB1-69	UBA5429	UBA5429	ASV_ASV18	2.58122
1236678F1225687	2N_tarta	Not determined	002-003	Juveniles (2-25)	Curieuse (Nursery)	17.02.2020	Bacteria	Bacteroidota	Bacteroidia	Bacteroidales	Bacteroidaceae	Bacteroides_H	Bacteroides_H	ASV_ASV30	2.57673
1236660F1225669	30C_tarta	M	090-100	Elderly (71-100)	Curieuse	17.02.2020	Bacteria	Bacillota_A	Clostridia	Peptostreptococcales	Peptostreptococcaceae	Terrisporobacter	Terrisporobacter	ASV_ASV10	2.57449
1236668F1225677	22F_tarta	M	080-090	Elderly (71-100)	Curieuse	2022	Bacteria	Bacillota_A	Clostridia	Lachnospirales	Lachnospiraceae			ASV_ASV48	2.57448
1236684F1225693	27_tarta	Not determined	001-002	Juveniles (2-25)	Curieuse (Nursery)	2022	Bacteria	Bacillota_A	Clostridia	Clostridiales	Clostridiaceae	Sarcina	Sarcina	ASV_ASV1	2.57436
1236673F1225682	n6_tarta	M	070-080	Elderly (71-100)	Curieuse	14.02.2020	Bacteria	Bacteroidota	Bacteroidia	Bacteroidales	WCHB1-69	UBA5429	UBA5429	ASV_ASV21	2.57313
1236703F1225712	4BG_tarta	M	030-040	Adults (26-70)	Botanical Garden	19.02.2020	Bacteria	Bacillota_A	Clostridia	Lachnospirales	Lachnospiraceae			ASV_ASV163	2.57267
1236685F1225694	16F_tarta	M	080-090	Elderly (71-100)	Botanical Garden	2022	Bacteria	Bacteroidota	Bacteroidia	Bacteroidales	UBA932	Coprenecus	Coprenecus	ASV_ASV3	2.56721
1236679F1225688	3N_tarta	Not determined	002-003	Juveniles (2-25)	Curieuse (Nursery)	17.02.2020	Bacteria	Bacteroidota	Bacteroidia	Bacteroidales	Bacteroidaceae	Bacteroides_H	Bacteroides_H	ASV_ASV30	2.55448
1236707F1225716	8BG_tarta	M	100 +	Centenarians (101+)	Botanical Garden	19.02.2020	Bacteria	Bacteroidota	Bacteroidia	Bacteroidales	UBA932	Bact-08	Bact-08	ASV_ASV5	2.53767
1236692F1225701	7_tarta	F	015 -	Juveniles (2-25)	Parco Natura Viva	21.06.2021	Bacteria	Bacillota_A	Clostridia	Lachnospirales	Lachnospiraceae	Fimousia	Fimousia	ASV_ASV189	2.52944
1236657F1225666	�	F	030-040	Adults (26-70)	Curieuse	14.02.2020	Bacteria	Bacteroidota	Bacteroidia	Bacteroidales	UBA932	Bact-08	Bact-08	ASV_ASV5	2.52842
1236680F1225689	4N_tarta	Not determined	2	Juveniles (2-25)	Curieuse (Nursery)	17.02.2020	Bacteria	Bacillota_A	Clostridia	Clostridiales	Clostridiaceae	Sarcina	Sarcina	ASV_ASV1	2.52091
1236688F1225697	19F_tarta	F	005-006	Juveniles (2-25)	Botanical Garden	2022	Bacteria	Bacteroidota	Bacteroidia	Bacteroidales	Bacteroidaceae	Prevotella	Prevotella	ASV_ASV200	2.518
1236699F1225708	31C_tarta	Not determined	004-005	Juveniles (2-25)	Curieuse (Nursery)	17.02.2020	Bacteria	Bacillota_A	Clostridia	Lachnospirales	Lachnospiraceae			ASV_ASV2	2.51532
1236702F1225711	3BG_tarta	F	030-040	Adults (26-70)	Botanical Garden	19.02.2020	Bacteria	Bacteroidota	Bacteroidia	Bacteroidales	UBA932	Coprenecus	Coprenecus	ASV_ASV3	2.50522
1236680F1225689	4N_tarta	Not determined	2	Juveniles (2-25)	Curieuse (Nursery)	17.02.2020	Bacteria	Bacillota_A	Clostridia	Lachnospirales	Lachnospiraceae			ASV_ASV17	2.49701
1236660F1225669	30C_tarta	M	090-100	Elderly (71-100)	Curieuse	17.02.2020	Bacteria	Bacillota	Bacilli	Bacillales	DSM-1321	Bacillus_AD	Bacillus_AD	ASV_ASV29	2.49069
1236662F1225671	n2_tarta	M	070-080	Elderly (71-100)	Curieuse	14.02.2020	Bacteria	Bacillota_A	Clostridia	Clostridiales	Clostridiaceae	Clostridium	Clostridium	ASV_ASV282	2.48074
1236682F1225691	25F_tarta	Not determined	005 -	Juveniles (2-25)	Curieuse (Nursery)	2022	Bacteria	Bacillota_A	Clostridia	Clostridiales	Clostridiaceae	Clostridium	Clostridium	ASV_ASV81	2.47869
1236671F1225680	ROGER_tarta	M	100 +	Centenarians (101+)	Parco Natura Viva	21.06.2021	Bacteria	Bacillota_A	Clostridia	Clostridiales	Clostridiaceae	Clostridium	Clostridium	ASV_ASV42	2.4721
1236681F1225690	24F_tarta	M	030-040	Adults (26-70)	Curieuse	2022	Bacteria	Bacillota_A	Clostridia	Lachnospirales	Lachnospiraceae			ASV_ASV2	2.46666
1236664F1225673	12GH_tarta (=20C)	F	040-050	Adults (26-70)	Curieuse	15.02.2020	Bacteria	Bacillota_A	Clostridia	Clostridiales	Clostridiaceae	Sarcina	Sarcina	ASV_ASV1	2.45023
1236670F1225679	4Na_tarta	Not determined	002-003	Juveniles (2-25)	Curieuse (Nursery)	17.02.2020	Bacteria	Pseudomonadota	Gammaproteobacteria	Pseudomonadales	Moraxellaceae	Acinetobacter	Acinetobacter	ASV_ASV210	2.44001
1236689F1225698	29F_tarta	Not determined	004-005	Juveniles (2-25)	Private Garden	2022	Bacteria	Bacillota_A	Clostridia	Clostridiales	Clostridiaceae	Clostridium	Clostridium	ASV_ASV44	2.4399
1236679F1225688	3N_tarta	Not determined	002-003	Juveniles (2-25)	Curieuse (Nursery)	17.02.2020	Bacteria							ASV_ASV24	2.43193
1236707F1225716	8BG_tarta	M	100 +	Centenarians (101+)	Botanical Garden	19.02.2020	Bacteria	Bacteroidota	Bacteroidia	Bacteroidales	UBA932	Coprenecus	Coprenecus	ASV_ASV3	2.43061
1236705F1225714	6BG_tarta	M	040-050	Adults (26-70)	Botanical Garden	19.02.2020	RS_GCF_001729965.1~NZ_JRWK01000030.1 Archaea	Methanobacteriota	Methanobacteria	Methanobacteriales	Methanobacteriaceae	Methanosphaera	Methanosphaera sp001729965 [location=1..1480] [ssu_len=1480] [contig_len=1498]	ASV_ASV41	2.41682
1236684F1225693	27_tarta	Not determined	001-002	Juveniles (2-25)	Curieuse (Nursery)	2022	Bacteria	Bacillota_A	Clostridia	Lachnospirales	Lachnospiraceae			ASV_ASV28	2.4144
1236693F1225702	8_tarta	F	100 +	Centenarians (101+)	Parco Natura Viva	21.06.2021	Bacteria	Bacillota	Bacilli	Bacillales	DSM-1321	Bacillus_AD	Bacillus_AD	ASV_ASV6	2.40448
1236689F1225698	29F_tarta	Not determined	004-005	Juveniles (2-25)	Private Garden	2022	Bacteria	Bacillota_A	Clostridia	Lachnospirales	Lachnospiraceae			ASV_ASV2	2.40126
1236709F1225718	BULBO_tarta	M	100 +	Centenarians (101+)	Parco Natura Viva	21.06.2021	Bacteria	Bacillota	Bacilli	Bacillales	DSM-1321	Bacillus_AD	Bacillus_AD	ASV_ASV6	2.38607
1236703F1225712	4BG_tarta	M	030-040	Adults (26-70)	Botanical Garden	19.02.2020	Bacteria	Bacteroidota	Bacteroidia	Bacteroidales				ASV_ASV46	2.38372
1236679F1225688	3N_tarta	Not determined	002-003	Juveniles (2-25)	Curieuse (Nursery)	17.02.2020	Bacteria	Bacillota_A	Clostridia	Lachnospirales	Lachnospiraceae			ASV_ASV14	2.38214
1236669F1225678	17C_tarta	M	060-070	Adults (26-70)	Curieuse	15.02.2020	Bacteria	Bacteroidota	Bacteroidia	Bacteroidales				ASV_ASV4	2.37587
1236663F1225672	19N_tarta	Not determined	004-005	Juveniles (2-25)	Curieuse (Nursery)	15.02.2020	Bacteria	Bacteroidota	Bacteroidia	Bacteroidales				ASV_ASV13	2.37325
1236687F1225696	18F_tarta	F	040-050	Adults (26-70)	Botanical Garden	2022	Bacteria	Bacteroidota	Bacteroidia	Bacteroidales	UBA932	Bact-08	Bact-08	ASV_ASV5	2.36157
1236680F1225689	4N_tarta	Not determined	2	Juveniles (2-25)	Curieuse (Nursery)	17.02.2020	Bacteria	Pseudomonadota	Gammaproteobacteria	Pseudomonadales	Moraxellaceae	Acinetobacter	Acinetobacter	ASV_ASV96	2.35962
1236690F1225699	30F_tarta	Not determined	004-005	Juveniles (2-25)	Private Garden	2022	Bacteria	Bacillota	Bacilli	Bacillales	Planococcaceae	Lysinibacillus	Lysinibacillus	ASV_ASV464	2.352
1236690F1225699	30F_tarta	Not determined	004-005	Juveniles (2-25)	Private Garden	2022	Bacteria	Bacillota_A	Clostridia	Clostridiales	Clostridiaceae	Clostridium	Clostridium	ASV_ASV8	2.352
1236700F1225709	1BG_tarta	F	030-040	Adults (26-70)	Botanical Garden	19.02.2020	Bacteria	Bacteroidota	Bacteroidia	Bacteroidales	Bacteroidaceae	43-108	43-108	ASV_ASV53	2.3469
1236676F1225685	n10_tarta	M	090-100	Elderly (71-100)	Curieuse	15.02.2020	Bacteria	Bacillota_A	Clostridia	Peptostreptococcales	Peptostreptococcaceae	Terrisporobacter	Terrisporobacter	ASV_ASV10	2.33727
1236666F1225675	27C_tarta	M	080-090	Elderly (71-100)	Curieuse	16.02.2020	Bacteria	Bacteroidota	Bacteroidia	Bacteroidales	WCHB1-69	UBA5429	UBA5429	ASV_ASV23	2.33443
1236667F1225676	29C_tarta	M	100 +	Centenarians (101+)	Curieuse	17.02.2020	Bacteria	Spirochaetota	Spirochaetia	Treponematales	Treponemataceae	Treponema_C	Treponema_C	ASV_ASV15	2.33084
1236703F1225712	4BG_tarta	M	030-040	Adults (26-70)	Botanical Garden	19.02.2020	Bacteria	Bacillota_A	Clostridia	Lachnospirales	Lachnospiraceae			ASV_ASV131	2.32558
1236663F1225672	19N_tarta	Not determined	004-005	Juveniles (2-25)	Curieuse (Nursery)	15.02.2020	Bacteria	Bacteroidota	Bacteroidia	Bacteroidales	Bacteroidaceae	Bacteroides_H	Bacteroides_H	ASV_ASV30	2.31931
1236681F1225690	24F_tarta	M	030-040	Adults (26-70)	Curieuse	2022	Bacteria	Bacillota_A	Clostridia	Lachnospirales	Lachnospiraceae			ASV_ASV14	2.31907
1236693F1225702	8_tarta	F	100 +	Centenarians (101+)	Parco Natura Viva	21.06.2021	Bacteria	Bacillota_A	Clostridia	Lachnospirales	Cellulosilyticaceae	Cellulosilyticum	Cellulosilyticum	ASV_ASV76	2.31361
1236671F1225680	ROGER_tarta	M	100 +	Centenarians (101+)	Parco Natura Viva	21.06.2021	Bacteria	Bacillota_A	Clostridia	Lachnospirales	Lachnospiraceae	Fimousia	Fimousia	ASV_ASV189	2.30422
1236659F1225668	28C_tarta	M	080-090	Elderly (71-100)	Curieuse	16.02.2020	Bacteria	Bacillota_A	Clostridia	Lachnospirales	Lachnospiraceae	Velocimicrobium	Velocimicrobium	ASV_ASV40	2.29988
1236697F1225706	21C_tarta	M	080-090	Elderly (71-100)	Curieuse	16.02.2020	Bacteria	Bacillota_A	Clostridia	Clostridiales	Clostridiaceae	Clostridium	Clostridium	ASV_ASV86	2.29896
1236689F1225698	29F_tarta	Not determined	004-005	Juveniles (2-25)	Private Garden	2022	Bacteria	Bacillota_A	Clostridia	Lachnospirales				ASV_ASV19	2.29047
1236680F1225689	4N_tarta	Not determined	2	Juveniles (2-25)	Curieuse (Nursery)	17.02.2020	Bacteria	Bacillota_A	Clostridia	Peptostreptococcales	Peptostreptococcaceae	Terrisporobacter	Terrisporobacter	ASV_ASV10	2.28793
1236708F1225717	15C_tarta	M	080-090	Elderly (71-100)	Curieuse	15.02.2020	Bacteria	Bacillota_A	Clostridia	Peptostreptococcales	Peptostreptococcaceae	Terrisporobacter	Terrisporobacter	ASV_ASV10	2.27925
1236695F1225704	11_tarta	F	015 -	Juveniles (2-25)	Parco Natura Viva	21.06.2021	Bacteria	Bacillota_A	Clostridia	Lachnospirales	Lachnospiraceae			ASV_ASV45	2.27817
1236687F1225696	18F_tarta	F	040-050	Adults (26-70)	Botanical Garden	2022	Bacteria	Bacillota_A	Clostridia	Clostridiales	Clostridiaceae	Inconstantimicrobium	Inconstantimicrobium	ASV_ASV38	2.2765
1236670F1225679	4Na_tarta	Not determined	002-003	Juveniles (2-25)	Curieuse (Nursery)	17.02.2020	Bacteria	Bacteroidota	Bacteroidia	Bacteroidales				ASV_ASV4	2.27436
1236658F1225667	24C_tarta	F	030-040	Adults (26-70)	Curieuse	16.02.2020	Bacteria	Bacteroidota	Bacteroidia	Bacteroidales	Bacteroidaceae	Bacteroides_H	Bacteroides_H	ASV_ASV30	2.26998
1236697F1225706	21C_tarta	M	080-090	Elderly (71-100)	Curieuse	16.02.2020	Bacteria	Bacteroidota	Bacteroidia	Bacteroidales	UBA932	Bact-08	Bact-08	ASV_ASV5	2.26834
1236705F1225714	6BG_tarta	M	040-050	Adults (26-70)	Botanical Garden	19.02.2020	Bacteria	Bacteroidota	Bacteroidia	Bacteroidales	WCHB1-69	UBA5429	UBA5429	ASV_ASV132	2.2645
1236688F1225697	19F_tarta	F	005-006	Juveniles (2-25)	Botanical Garden	2022	Bacteria	Bacillota_A	Clostridia	Lachnospirales	Lachnospiraceae			ASV_ASV2	2.25586
1236663F1225672	19N_tarta	Not determined	004-005	Juveniles (2-25)	Curieuse (Nursery)	15.02.2020								ASV_ASV52	2.2551
1236691F1225700	31F_tarta	Not determined	004-005	Juveniles (2-25)	Private Garden	2022	Bacteria	Bacillota	Bacilli	Bacillales	DSM-1321	Bacillus_AD	Bacillus_AD	ASV_ASV6	2.25218
1236686F1225695	17F_tarta	M	080-090	Elderly (71-100)	Botanical Garden	2022	Bacteria	Bacillota_A	Clostridia	Clostridiales	Caloramatoraceae			ASV_ASV234	2.2498
1236699F1225708	31C_tarta	Not determined	004-005	Juveniles (2-25)	Curieuse (Nursery)	17.02.2020	Bacteria							ASV_ASV24	2.24877
1236688F1225697	19F_tarta	F	005-006	Juveniles (2-25)	Botanical Garden	2022	Bacteria	Bacillota_A	Clostridia	Clostridiales	Clostridiaceae	Clostridium	Clostridium	ASV_ASV92	2.2374
1236704F1225713	5BG_tarta	M	080-090	Elderly (71-100)	Botanical Garden	19.02.2020	Bacteria	Bacillota_A	Clostridia	Lachnospirales	Lachnospiraceae			ASV_ASV14	2.23658
1236699F1225708	31C_tarta	Not determined	004-005	Juveniles (2-25)	Curieuse (Nursery)	17.02.2020	Bacteria	Spirochaetota	GWE2-31-10	GWE2-31-10	GWE2-31-10	RGIG8597	RGIG8597	ASV_ASV114	2.23652
1236706F1225715	7BG_tarta	F	050-060	Adults (26-70)	Botanical Garden	19.02.2020	Bacteria	Bacteroidota	Bacteroidia	Bacteroidales	Bacteroidaceae	43-108	43-108	ASV_ASV53	2.23055
1236685F1225694	16F_tarta	M	080-090	Elderly (71-100)	Botanical Garden	2022	Bacteria	Bacillota_A	Clostridia	TANB77	CAG-508			ASV_ASV87	2.23024
1236688F1225697	19F_tarta	F	005-006	Juveniles (2-25)	Botanical Garden	2022	Bacteria	Bacillota_A	Clostridia	Clostridiales	Clostridiaceae	Clostridium	Clostridium	ASV_ASV64	2.23002
1236680F1225689	4N_tarta	Not determined	2	Juveniles (2-25)	Curieuse (Nursery)	17.02.2020	Bacteria	Bacillota	Bacilli	Staphylococcales	Staphylococcaceae	Staphylococcus	Staphylococcus	ASV_ASV407	2.22222
1236708F1225717	15C_tarta	M	080-090	Elderly (71-100)	Curieuse	15.02.2020	Bacteria	Bacteroidota	Bacteroidia	Bacteroidales	UBA932	Coprenecus	Coprenecus	ASV_ASV3	2.2207
1236685F1225694	16F_tarta	M	080-090	Elderly (71-100)	Botanical Garden	2022	Bacteria	Bacteroidota	Bacteroidia	Bacteroidales	UBA932	Bact-08	Bact-08	ASV_ASV5	2.20807
1236688F1225697	19F_tarta	F	005-006	Juveniles (2-25)	Botanical Garden	2022	Bacteria	Bacillota_A	Clostridia	Clostridiales	Clostridiaceae	Clostridium	Clostridium	ASV_ASV9	2.20786
1236674F1225683	n8_tarta	Not determined	004-005	Juveniles (2-25)	Curieuse (Nursery)	14.02.2020	Bacteria	Bacteroidota	Bacteroidia	Bacteroidales				ASV_ASV13	2.20293
1236703F1225712	4BG_tarta	M	030-040	Adults (26-70)	Botanical Garden	19.02.2020	Bacteria	Bacteroidota	Bacteroidia	Bacteroidales	UBA932	Bact-08	Bact-08	ASV_ASV5	2.19477
1236680F1225689	4N_tarta	Not determined	2	Juveniles (2-25)	Curieuse (Nursery)	17.02.2020	Bacteria	Pseudomonadota	Gammaproteobacteria	Pseudomonadales	Moraxellaceae	Acinetobacter	Acinetobacter	ASV_ASV210	2.19235
1236686F1225695	17F_tarta	M	080-090	Elderly (71-100)	Botanical Garden	2022	Bacteria	Bacillota_A	Clostridia	Clostridiales	Clostridiaceae	Clostridium	Clostridium	ASV_ASV74	2.18927
1236668F1225677	22F_tarta	M	080-090	Elderly (71-100)	Curieuse	2022	Bacteria	Bacteroidota	Bacteroidia	Bacteroidales				ASV_ASV4	2.18844
1236683F1225692	26_tarta	Not determined	001-002	Juveniles (2-25)	Curieuse (Nursery)	2022	Bacteria	Bacillota_A	Clostridia	Clostridiales	Clostridiaceae	Sarcina	Sarcina	ASV_ASV1	2.1823
1236674F1225683	n8_tarta	Not determined	004-005	Juveniles (2-25)	Curieuse (Nursery)	14.02.2020	Bacteria	Bacteroidota	Bacteroidia	Bacteroidales	UBA932	Coprenecus	Coprenecus	ASV_ASV3	2.17814
1236708F1225717	15C_tarta	M	080-090	Elderly (71-100)	Curieuse	15.02.2020	Bacteria	Bacteroidota	Bacteroidia	Bacteroidales				ASV_ASV13	2.16997
1236682F1225691	25F_tarta	Not determined	005 -	Juveniles (2-25)	Curieuse (Nursery)	2022	Bacteria	Bacillota_A	Clostridia	Clostridiales	Clostridiaceae	Clostridium	Clostridium	ASV_ASV55	2.16856
1236682F1225691	25F_tarta	Not determined	005 -	Juveniles (2-25)	Curieuse (Nursery)	2022	Bacteria	Bacillota	Bacilli					ASV_ASV79	2.16146
1236680F1225689	4N_tarta	Not determined	2	Juveniles (2-25)	Curieuse (Nursery)	17.02.2020	Bacteria	Bacillota	Bacilli	Bacillales	Planococcaceae	Solibacillus	Solibacillus	ASV_ASV195	2.15651
1236691F1225700	31F_tarta	Not determined	004-005	Juveniles (2-25)	Private Garden	2022	Bacteria	Bacillota	Bacilli	Bacillales	DSM-1321	Bacillus_AD	Bacillus_AD	ASV_ASV35	2.15194
1236704F1225713	5BG_tarta	M	080-090	Elderly (71-100)	Botanical Garden	19.02.2020	Bacteria	Bacteroidota	Bacteroidia	Bacteroidales	UBA932	Bact-08	Bact-08	ASV_ASV22	2.13294
1236692F1225701	7_tarta	F	015 -	Juveniles (2-25)	Parco Natura Viva	21.06.2021	Bacteria	Bacillota_A	Clostridia	Clostridiales	Clostridiaceae	Clostridium	Clostridium	ASV_ASV49	2.12687
1236709F1225718	BULBO_tarta	M	100 +	Centenarians (101+)	Parco Natura Viva	21.06.2021	Bacteria	Bacillota_A	Clostridia	Peptostreptococcales	Peptostreptococcaceae	Terrisporobacter	Terrisporobacter	ASV_ASV10	2.12482
1236675F1225684	n9_tarta	M	070-080	Elderly (71-100)	Curieuse	15.02.2020	Bacteria	Bacteroidota	Bacteroidia	Bacteroidales	WCHB1-69	UBA5429	UBA5429	ASV_ASV18	2.12236
1236675F1225684	n9_tarta	M	070-080	Elderly (71-100)	Curieuse	15.02.2020	Bacteria	Bacteroidota	Bacteroidia	Bacteroidales	WCHB1-69	UBA5429	UBA5429	ASV_ASV21	2.1194
1236659F1225668	28C_tarta	M	080-090	Elderly (71-100)	Curieuse	16.02.2020	Bacteria	Bacteroidota	Bacteroidia	Bacteroidales	UBA932	Coprenecus	Coprenecus	ASV_ASV3	2.11495
1236705F1225714	6BG_tarta	M	040-050	Adults (26-70)	Botanical Garden	19.02.2020	Bacteria	Bacteroidota	Bacteroidia	Bacteroidales	UBA932	Bact-08	Bact-08	ASV_ASV22	2.11218
1236659F1225668	28C_tarta	M	080-090	Elderly (71-100)	Curieuse	16.02.2020	Bacteria	Bacteroidota	Bacteroidia	Bacteroidales	ZOR0009	Acetobacteroides	Acetobacteroides	ASV_ASV90	2.1107
1236660F1225669	30C_tarta	M	090-100	Elderly (71-100)	Curieuse	17.02.2020	Bacteria	Bacteroidota	Bacteroidia	Bacteroidales	UBA932	Coprenecus	Coprenecus	ASV_ASV3	2.10428
1236666F1225675	27C_tarta	M	080-090	Elderly (71-100)	Curieuse	16.02.2020	Bacteria	Bacillota_A	Clostridia	Clostridiales	Clostridiaceae	Clostridium	Clostridium	ASV_ASV36	2.09963
1236662F1225671	n2_tarta	M	070-080	Elderly (71-100)	Curieuse	14.02.2020	Bacteria	Bacillota_A	Clostridia	Oscillospirales	Ruminococcaceae	HUN007	HUN007	ASV_ASV16	2.09127
1236658F1225667	24C_tarta	F	030-040	Adults (26-70)	Curieuse	16.02.2020	Bacteria	Spirochaetota	Spirochaetia	Treponematales	Treponemataceae	Treponema_C	Treponema_C	ASV_ASV15	2.08641
1236685F1225694	16F_tarta	M	080-090	Elderly (71-100)	Botanical Garden	2022	Bacteria	Spirochaetota	Spirochaetia	Treponematales	Treponemataceae	Treponema_C	Treponema_C	ASV_ASV15	2.08392
1236657F1225666	�	F	030-040	Adults (26-70)	Curieuse	14.02.2020	Bacteria	Bacteroidota	Bacteroidia	Bacteroidales	UBA932	Bact-08	Bact-08	ASV_ASV22	2.07682
1236683F1225692	26_tarta	Not determined	001-002	Juveniles (2-25)	Curieuse (Nursery)	2022	Bacteria	Bacillota_A	Clostridia	Lachnospirales	Lachnospiraceae			ASV_ASV14	2.07591
1236686F1225695	17F_tarta	M	080-090	Elderly (71-100)	Botanical Garden	2022	Bacteria	Bacillota_A	Clostridia	Clostridiales	Clostridiaceae	Inconstantimicrobium	Inconstantimicrobium	ASV_ASV38	2.05811
1236688F1225697	19F_tarta	F	005-006	Juveniles (2-25)	Botanical Garden	2022	Bacteria	Bacillota_A	Clostridia	Oscillospirales	Acutalibacteraceae	UMGS1532	UMGS1532	ASV_ASV317	2.05649
1236683F1225692	26_tarta	Not determined	001-002	Juveniles (2-25)	Curieuse (Nursery)	2022	Bacteria	Bacillota_A	Clostridia					ASV_ASV206	2.05364
1236670F1225679	4Na_tarta	Not determined	002-003	Juveniles (2-25)	Curieuse (Nursery)	17.02.2020	Bacteria	Bacillota	Bacilli	Bacillales	Planococcaceae	Solibacillus	Solibacillus	ASV_ASV195	2.04826
1236690F1225699	30F_tarta	Not determined	004-005	Juveniles (2-25)	Private Garden	2022	Bacteria	Bacillota_A	Clostridia	Lachnospirales				ASV_ASV19	2.04463
1236706F1225715	7BG_tarta	F	050-060	Adults (26-70)	Botanical Garden	19.02.2020	RS_GCF_001729965.1~NZ_JRWK01000030.1 Archaea	Methanobacteriota	Methanobacteria	Methanobacteriales	Methanobacteriaceae	Methanosphaera	Methanosphaera sp001729965 [location=1..1480] [ssu_len=1480] [contig_len=1498]	ASV_ASV41	2.04195
1236664F1225673	12GH_tarta (=20C)	F	040-050	Adults (26-70)	Curieuse	15.02.2020	Bacteria	Actinomycetota	Actinomycetia	Actinomycetales	Brevibacteriaceae	Brevibacterium	Brevibacterium	ASV_ASV162	2.04148
1236698F1225707	22C_tarta	M	090-100	Elderly (71-100)	Curieuse	16.02.2020	Bacteria	Bacillota_A	Clostridia	Oscillospirales	Ruminococcaceae	HUN007	HUN007	ASV_ASV16	2.03891
1236706F1225715	7BG_tarta	F	050-060	Adults (26-70)	Botanical Garden	19.02.2020	Bacteria	Bacteroidota	Bacteroidia	Bacteroidales	UBA932	Bact-08	Bact-08	ASV_ASV5	2.03692
1236661F1225670	9BG_tarta	M	090-100	Elderly (71-100)	Botanical Garden	18.02.2020	Bacteria	Spirochaetota	Spirochaetia	Treponematales	UBA12059	SZUA-370	SZUA-370	ASV_ASV95	2.0324
1236669F1225678	17C_tarta	M	060-070	Adults (26-70)	Curieuse	15.02.2020	Bacteria	Actinomycetota	Actinomycetia	Actinomycetales	Brevibacteriaceae	Brevibacterium	Brevibacterium	ASV_ASV162	2.02989
1236682F1225691	25F_tarta	Not determined	005 -	Juveniles (2-25)	Curieuse (Nursery)	2022	Bacteria	Bacillota_A	Clostridia	Lachnospirales	Lachnospiraceae			ASV_ASV25	2.02652
1236700F1225709	1BG_tarta	F	030-040	Adults (26-70)	Botanical Garden	19.02.2020	Bacteria	Spirochaetota	Spirochaetia	Treponematales	Treponemataceae	Treponema_C	Treponema_C	ASV_ASV15	2.01876
1236677F1225686	1N_tarta	Not determined	001-002	Juveniles (2-25)	Curieuse (Nursery)	17.02.2020								ASV_ASV51	2.01867
1236689F1225698	29F_tarta	Not determined	004-005	Juveniles (2-25)	Private Garden	2022	Bacteria	Bacillota_A	Clostridia	Lachnospirales	Lachnospiraceae			ASV_ASV28	2.01737
1236693F1225702	8_tarta	F	100 +	Centenarians (101+)	Parco Natura Viva	21.06.2021	Bacteria	Bacteroidota	Bacteroidia	Bacteroidales				ASV_ASV4	2.01446
1236669F1225678	17C_tarta	M	060-070	Adults (26-70)	Curieuse	15.02.2020	Bacteria	Bacillota_A	Clostridia	Clostridiales	Clostridiaceae	Clostridium	Clostridium	ASV_ASV20	2.00827
1236668F1225677	22F_tarta	M	080-090	Elderly (71-100)	Curieuse	2022	Bacteria	Bacillota_A	Clostridia	Clostridiales	Clostridiaceae	Clostridium	Clostridium	ASV_ASV20	2.0074
1236669F1225678	17C_tarta	M	060-070	Adults (26-70)	Curieuse	15.02.2020	Bacteria	Bacillota_A	Clostridia	Lachnospirales	Lachnospiraceae			ASV_ASV2	2.00557
1236674F1225683	n8_tarta	Not determined	004-005	Juveniles (2-25)	Curieuse (Nursery)	14.02.2020								ASV_ASV51	2.00455
1236705F1225714	6BG_tarta	M	040-050	Adults (26-70)	Botanical Garden	19.02.2020	Bacteria	Bacillota_A	Clostridia	Clostridiales	Clostridiaceae	Clostridium	Clostridium	ASV_ASV55	2.00386
1236683F1225692	26_tarta	Not determined	001-002	Juveniles (2-25)	Curieuse (Nursery)	2022	Bacteria	Bacillota_A	Clostridia	Lachnospirales	Lachnospiraceae			ASV_ASV28	1.99673
1236686F1225695	17F_tarta	M	080-090	Elderly (71-100)	Botanical Garden	2022	Bacteria	Bacillota_A	Clostridia	Peptostreptococcales	Peptostreptococcaceae			ASV_ASV98	1.99085
1236706F1225715	7BG_tarta	F	050-060	Adults (26-70)	Botanical Garden	19.02.2020	Bacteria	Bacillota_A	Clostridia	Lachnospirales	Lachnospiraceae			ASV_ASV88	1.98662
1236700F1225709	1BG_tarta	F	030-040	Adults (26-70)	Botanical Garden	19.02.2020	Bacteria	Verrucomicrobiota	Verrucomicrobiae	Opitutales	UBA953	Spyradosoma	Spyradosoma	ASV_ASV219	1.98309
1236678F1225687	2N_tarta	Not determined	002-003	Juveniles (2-25)	Curieuse (Nursery)	17.02.2020	Bacteria	Bacillota_A	Clostridia	Lachnospirales	Lachnospiraceae			ASV_ASV120	1.97483
1236664F1225673	12GH_tarta (=20C)	F	040-050	Adults (26-70)	Curieuse	15.02.2020	Bacteria	Bacillota	Bacilli	ML615J-28	CAG-313	UMGS75	UMGS75	ASV_ASV213	1.96989
1236668F1225677	22F_tarta	M	080-090	Elderly (71-100)	Curieuse	2022	Bacteria	Bacillota_A	Clostridia	Peptostreptococcales	Peptostreptococcaceae	Terrisporobacter	Terrisporobacter	ASV_ASV10	1.96747
1236684F1225693	27_tarta	Not determined	001-002	Juveniles (2-25)	Curieuse (Nursery)	2022	Bacteria	Bacillota_A	Clostridia	Lachnospirales	Lachnospiraceae			ASV_ASV69	1.96451
1236681F1225690	24F_tarta	M	030-040	Adults (26-70)	Curieuse	2022	Bacteria	Bacillota_A	Clostridia	Oscillospirales	Butyricicoccaceae	Butyricicoccus_A	Butyricicoccus_A	ASV_ASV147	1.96383
1236670F1225679	4Na_tarta	Not determined	002-003	Juveniles (2-25)	Curieuse (Nursery)	17.02.2020	Bacteria	Bacillota_A	Clostridia	Clostridiales	Clostridiaceae	Sarcina	Sarcina	ASV_ASV1	1.96096
1236706F1225715	7BG_tarta	F	050-060	Adults (26-70)	Botanical Garden	19.02.2020	Bacteria	Fibrobacterota	Fibrobacteria	Fibrobacterales	Fibrobacteraceae	CAIRAY01	CAIRAY01	ASV_ASV142	1.95896
1236700F1225709	1BG_tarta	F	030-040	Adults (26-70)	Botanical Garden	19.02.2020	Bacteria	Bacteroidota	Bacteroidia	Bacteroidales				ASV_ASV4	1.95099
1236696F1225705	20C_tarta	F	040-050	Adults (26-70)	Curieuse	16.02.2020	Bacteria	Bacillota_A	Clostridia	Lachnospirales	Lachnospiraceae			ASV_ASV2	1.94578
1236670F1225679	4Na_tarta	Not determined	002-003	Juveniles (2-25)	Curieuse (Nursery)	17.02.2020	Bacteria	Pseudomonadota	Gammaproteobacteria	Xanthomonadales	Xanthomonadaceae	Stenotrophomonas	Stenotrophomonas	ASV_ASV263	1.94529
1236659F1225668	28C_tarta	M	080-090	Elderly (71-100)	Curieuse	16.02.2020	Bacteria	Bacteroidota	Bacteroidia	Bacteroidales	UBA932			ASV_ASV37	1.94278
1236670F1225679	4Na_tarta	Not determined	002-003	Juveniles (2-25)	Curieuse (Nursery)	17.02.2020	Bacteria	Bacillota_A	Clostridia	Peptostreptococcales	Peptostreptococcaceae	Terrisporobacter	Terrisporobacter	ASV_ASV10	1.92962
1236663F1225672	19N_tarta	Not determined	004-005	Juveniles (2-25)	Curieuse (Nursery)	15.02.2020	Bacteria	Bacteroidota	Bacteroidia	Bacteroidales	UBA932	Coprenecus	Coprenecus	ASV_ASV3	1.92634
1236698F1225707	22C_tarta	M	090-100	Elderly (71-100)	Curieuse	16.02.2020	Bacteria	Bacteroidota	Bacteroidia	Bacteroidales	Bacteroidaceae			ASV_ASV60	1.91858
1236688F1225697	19F_tarta	F	005-006	Juveniles (2-25)	Botanical Garden	2022	Bacteria	Bacillota_A	Clostridia	Clostridiales	Clostridiaceae	Clostridium	Clostridium	ASV_ASV245	1.90881
1236695F1225704	11_tarta	F	015 -	Juveniles (2-25)	Parco Natura Viva	21.06.2021	Bacteria	Bacillota_A	Clostridia	Clostridiales	Clostridiaceae	Clostridium	Clostridium	ASV_ASV49	1.90699
1236664F1225673	12GH_tarta (=20C)	F	040-050	Adults (26-70)	Curieuse	15.02.2020	Bacteria	Bacillota	Bacilli	Staphylococcales	Staphylococcaceae	Staphylococcus	Staphylococcus	ASV_ASV27	1.90522
1236695F1225704	11_tarta	F	015 -	Juveniles (2-25)	Parco Natura Viva	21.06.2021	Bacteria	Bacillota_A	Clostridia	Clostridiales	Clostridiaceae	Clostridium	Clostridium	ASV_ASV42	1.90306
1236681F1225690	24F_tarta	M	030-040	Adults (26-70)	Curieuse	2022	Bacteria	Bacillota_A	Clostridia	Lachnospirales	Lachnospiraceae			ASV_ASV25	1.89628
1236663F1225672	19N_tarta	Not determined	004-005	Juveniles (2-25)	Curieuse (Nursery)	15.02.2020	Bacteria	Spirochaetota	GWE2-31-10	GWE2-31-10	GWE2-31-10	RGIG8597	RGIG8597	ASV_ASV114	1.89038
1236709F1225718	BULBO_tarta	M	100 +	Centenarians (101+)	Parco Natura Viva	21.06.2021	Bacteria	Bacillota_A	Clostridia	Clostridiales	Clostridiaceae	Clostridium	Clostridium	ASV_ASV78	1.88679
1236678F1225687	2N_tarta	Not determined	002-003	Juveniles (2-25)	Curieuse (Nursery)	17.02.2020								ASV_ASV82	1.87534
1236660F1225669	30C_tarta	M	090-100	Elderly (71-100)	Curieuse	17.02.2020	Bacteria	Bacteroidota	Bacteroidia	Bacteroidales				ASV_ASV4	1.87151
1236680F1225689	4N_tarta	Not determined	2	Juveniles (2-25)	Curieuse (Nursery)	17.02.2020	Bacteria	Bacillota_A	Clostridia	Lachnospirales	Lachnospiraceae			ASV_ASV2	1.8638
1236696F1225705	20C_tarta	F	040-050	Adults (26-70)	Curieuse	16.02.2020	Bacteria	Bacillota_A	Clostridia	Peptostreptococcales	Peptostreptococcaceae	Terrisporobacter	Terrisporobacter	ASV_ASV10	1.86351
1236667F1225676	29C_tarta	M	100 +	Centenarians (101+)	Curieuse	17.02.2020	Bacteria	Bacteroidota	Bacteroidia	Bacteroidales				ASV_ASV13	1.86338
1236674F1225683	n8_tarta	Not determined	004-005	Juveniles (2-25)	Curieuse (Nursery)	14.02.2020	Bacteria	Bacteroidota	Bacteroidia	Bacteroidales				ASV_ASV4	1.85162
1236708F1225717	15C_tarta	M	080-090	Elderly (71-100)	Curieuse	15.02.2020	Bacteria	Bacteroidota	Bacteroidia	Bacteroidales	UBA932	Bact-08	Bact-08	ASV_ASV5	1.84018
1236696F1225705	20C_tarta	F	040-050	Adults (26-70)	Curieuse	16.02.2020	Bacteria	Bacteroidota	Bacteroidia	Bacteroidales	WCHB1-69	UBA5429	UBA5429	ASV_ASV23	1.82648
1236673F1225682	n6_tarta	M	070-080	Elderly (71-100)	Curieuse	14.02.2020	Bacteria	Bacteroidota	Bacteroidia	Bacteroidales				ASV_ASV7	1.82466
1236670F1225679	4Na_tarta	Not determined	002-003	Juveniles (2-25)	Curieuse (Nursery)	17.02.2020	Bacteria	Pseudomonadota	Gammaproteobacteria	Pseudomonadales	Moraxellaceae	Acinetobacter	Acinetobacter	ASV_ASV96	1.82441
1236682F1225691	25F_tarta	Not determined	005 -	Juveniles (2-25)	Curieuse (Nursery)	2022	Bacteria	Bacillota	Bacilli	Bacillales	DSM-1321	Bacillus_AD	Bacillus_AD	ASV_ASV84	1.81818
1236709F1225718	BULBO_tarta	M	100 +	Centenarians (101+)	Parco Natura Viva	21.06.2021	Bacteria	Bacillota_A	Clostridia	Lachnospirales	Cellulosilyticaceae	Cellulosilyticum	Cellulosilyticum	ASV_ASV76	1.81713
1236678F1225687	2N_tarta	Not determined	002-003	Juveniles (2-25)	Curieuse (Nursery)	17.02.2020	Bacteria	Bacillota_A	Clostridia	Lachnospirales	Lachnospiraceae			ASV_ASV291	1.81565
1236681F1225690	24F_tarta	M	030-040	Adults (26-70)	Curieuse	2022	Bacteria	Bacillota	Bacilli	Bacillales	DSM-1321	Bacillus_AD	Bacillus_AD	ASV_ASV6	1.81122
1236662F1225671	n2_tarta	M	070-080	Elderly (71-100)	Curieuse	14.02.2020	Bacteria	Bacillota_A	Clostridia	Clostridiales	Clostridiaceae	Clostridium_AA	Clostridium_AA	ASV_ASV61	1.80764
1236678F1225687	2N_tarta	Not determined	002-003	Juveniles (2-25)	Curieuse (Nursery)	17.02.2020								ASV_ASV47	1.8057
1236661F1225670	9BG_tarta	M	090-100	Elderly (71-100)	Botanical Garden	18.02.2020	Bacteria	Fibrobacterota	Chitinivibrionia	Chitinivibrionales	Chitinispirillaceae	JAAYPC01	JAAYPC01	ASV_ASV39	1.80392
1236692F1225701	7_tarta	F	015 -	Juveniles (2-25)	Parco Natura Viva	21.06.2021	Bacteria	Bacillota_A	Clostridia	Clostridiales	Clostridiaceae	Clostridium	Clostridium	ASV_ASV42	1.79141
1236704F1225713	5BG_tarta	M	080-090	Elderly (71-100)	Botanical Garden	19.02.2020	Bacteria	Bacillota_A	Clostridia	Peptostreptococcales	Peptostreptococcaceae	Terrisporobacter	Terrisporobacter	ASV_ASV10	1.7883
1236698F1225707	22C_tarta	M	090-100	Elderly (71-100)	Curieuse	16.02.2020	Bacteria	Bacteroidota	Bacteroidia	Bacteroidales	UBA932	Bact-08	Bact-08	ASV_ASV5	1.78822
1236658F1225667	24C_tarta	F	030-040	Adults (26-70)	Curieuse	16.02.2020								ASV_ASV34	1.78643
1236668F1225677	22F_tarta	M	080-090	Elderly (71-100)	Curieuse	2022	Bacteria	Bacteroidota	Bacteroidia	Bacteroidales				ASV_ASV13	1.78643
1236693F1225702	8_tarta	F	100 +	Centenarians (101+)	Parco Natura Viva	21.06.2021	Bacteria	Bacillota_A	Clostridia	Clostridiales	Clostridiaceae	Clostridium	Clostridium	ASV_ASV32	1.78348
1236663F1225672	19N_tarta	Not determined	004-005	Juveniles (2-25)	Curieuse (Nursery)	15.02.2020								ASV_ASV126	1.7825
1236667F1225676	29C_tarta	M	100 +	Centenarians (101+)	Curieuse	17.02.2020	Bacteria	Bacteroidota	Bacteroidia	Bacteroidales	ZOR0009	Acetobacteroides	Acetobacteroides	ASV_ASV90	1.77721
1236673F1225682	n6_tarta	M	070-080	Elderly (71-100)	Curieuse	14.02.2020	Bacteria	Bacillota_A	Clostridia	Lachnospirales	Lachnospiraceae	Velocimicrobium	Velocimicrobium	ASV_ASV40	1.77611
1236684F1225693	27_tarta	Not determined	001-002	Juveniles (2-25)	Curieuse (Nursery)	2022	Bacteria	Bacillota_A	Clostridia	Clostridiales	Clostridiaceae	Clostridium	Clostridium	ASV_ASV81	1.77456
1236676F1225685	n10_tarta	M	090-100	Elderly (71-100)	Curieuse	15.02.2020	Bacteria	Pseudomonadota	Gammaproteobacteria	Enterobacterales	Enterobacteriaceae	Escherichia	Escherichia	ASV_ASV171	1.7718
1236704F1225713	5BG_tarta	M	080-090	Elderly (71-100)	Botanical Garden	19.02.2020	Bacteria	Bacillota_A	Clostridia	Lachnospirales	Lachnospiraceae			ASV_ASV2	1.76661
1236678F1225687	2N_tarta	Not determined	002-003	Juveniles (2-25)	Curieuse (Nursery)	17.02.2020	Bacteria	Bacillota_A	Clostridia	Lachnospirales	Lachnospiraceae			ASV_ASV371	1.76591
1236677F1225686	1N_tarta	Not determined	001-002	Juveniles (2-25)	Curieuse (Nursery)	17.02.2020	Bacteria	Bacillota_A	Clostridia	Clostridiales	Clostridiaceae	Sarcina	Sarcina	ASV_ASV1	1.76001
1236685F1225694	16F_tarta	M	080-090	Elderly (71-100)	Botanical Garden	2022	Bacteria	Bacillota_A	Clostridia	Clostridiales	Clostridiaceae	Clostridium	Clostridium	ASV_ASV8	1.75877
1236681F1225690	24F_tarta	M	030-040	Adults (26-70)	Curieuse	2022	Bacteria	Bacillota_A	Clostridia	Peptostreptococcales	Peptostreptococcaceae	Terrisporobacter	Terrisporobacter	ASV_ASV10	1.75619
1236700F1225709	1BG_tarta	F	030-040	Adults (26-70)	Botanical Garden	19.02.2020	Bacteria	Bacteroidota	Bacteroidia	Bacteroidales				ASV_ASV46	1.75126
1236670F1225679	4Na_tarta	Not determined	002-003	Juveniles (2-25)	Curieuse (Nursery)	17.02.2020	Bacteria	Pseudomonadota	Gammaproteobacteria	Pseudomonadales	Pseudomonadaceae	Pseudomonas_H	Pseudomonas_H	ASV_ASV305	1.74158
1236659F1225668	28C_tarta	M	080-090	Elderly (71-100)	Curieuse	16.02.2020	Bacteria	Spirochaetota	Spirochaetia	Treponematales	Treponemataceae	Treponema_C	Treponema_C	ASV_ASV15	1.74085
1236706F1225715	7BG_tarta	F	050-060	Adults (26-70)	Botanical Garden	19.02.2020	Bacteria	Bacteroidota	Bacteroidia	Bacteroidales	Bacteroidaceae			ASV_ASV400	1.74018
1236699F1225708	31C_tarta	Not determined	004-005	Juveniles (2-25)	Curieuse (Nursery)	17.02.2020	Bacteria	Bacillota	Bacilli					ASV_ASV79	1.73713
1236707F1225716	8BG_tarta	M	100 +	Centenarians (101+)	Botanical Garden	19.02.2020	Bacteria	Bacillota_A	Clostridia	Oscillospirales	Butyricicoccaceae	Butyricicoccus_A	Butyricicoccus_A	ASV_ASV225	1.73672
1236657F1225666	�	F	030-040	Adults (26-70)	Curieuse	14.02.2020	Bacteria	Bacillota_A	Clostridia	Clostridiales	Clostridiaceae	Clostridium_AA	Clostridium_AA	ASV_ASV61	1.7355
1236685F1225694	16F_tarta	M	080-090	Elderly (71-100)	Botanical Garden	2022	Bacteria	Bacillota_A	Clostridia	Clostridiales	Clostridiaceae	Clostridium	Clostridium	ASV_ASV64	1.73512
1236667F1225676	29C_tarta	M	100 +	Centenarians (101+)	Curieuse	17.02.2020	Bacteria	Bacteroidota	Bacteroidia	Bacteroidales	UBA932			ASV_ASV37	1.73413
1236678F1225687	2N_tarta	Not determined	002-003	Juveniles (2-25)	Curieuse (Nursery)	17.02.2020	Bacteria	Bacillota_A	Clostridia	Lachnospirales	Lachnospiraceae			ASV_ASV25	1.73108
1236665F1225674	23C_tarta	M	100 +	Centenarians (101+)	Curieuse	16.02.2020	Bacteria	Bacteroidota	Bacteroidia	Bacteroidales	UBA932	Bact-08	Bact-08	ASV_ASV5	1.7263
1236666F1225675	27C_tarta	M	080-090	Elderly (71-100)	Curieuse	16.02.2020	Bacteria	Bacteroidota	Bacteroidia	Bacteroidales				ASV_ASV7	1.72511
1236657F1225666	�	F	030-040	Adults (26-70)	Curieuse	14.02.2020	Bacteria	Bacillota_A	Clostridia	Oscillospirales	Ruminococcaceae	HUN007	HUN007	ASV_ASV16	1.72237
1236692F1225701	7_tarta	F	015 -	Juveniles (2-25)	Parco Natura Viva	21.06.2021	Bacteria	Bacillota_A	Clostridia	Lachnospirales	Cellulosilyticaceae	Cellulosilyticum	Cellulosilyticum	ASV_ASV76	1.7176
1236687F1225696	18F_tarta	F	040-050	Adults (26-70)	Botanical Garden	2022	Bacteria	Fibrobacterota	Chitinivibrionia	Chitinivibrionales	Chitinispirillaceae	JAAYPC01	JAAYPC01	ASV_ASV39	1.7175
1236691F1225700	31F_tarta	Not determined	004-005	Juveniles (2-25)	Private Garden	2022	Bacteria	Pseudomonadota	Alphaproteobacteria	Rhizobiales	Rhizobiaceae			ASV_ASV355	1.71686
1236699F1225708	31C_tarta	Not determined	004-005	Juveniles (2-25)	Curieuse (Nursery)	17.02.2020	Bacteria	Bacillota	Bacilli	Bacillales	DSM-1321	Bacillus_AD	Bacillus_AD	ASV_ASV84	1.71569
1236699F1225708	31C_tarta	Not determined	004-005	Juveniles (2-25)	Curieuse (Nursery)	17.02.2020	Bacteria	Bacillota	Bacilli	Bacillales	DSM-1321	Bacillus_AD	Bacillus_AD	ASV_ASV71	1.71262
1236683F1225692	26_tarta	Not determined	001-002	Juveniles (2-25)	Curieuse (Nursery)	2022	Bacteria	Bacillota_A	Clostridia	Lachnospirales	Lachnospiraceae			ASV_ASV93	1.71219
1236677F1225686	1N_tarta	Not determined	001-002	Juveniles (2-25)	Curieuse (Nursery)	17.02.2020	Bacteria	Bacteroidota	Bacteroidia	Bacteroidales	Bacteroidaceae	Bacteroides_H	Bacteroides_H	ASV_ASV30	1.7094
1236706F1225715	7BG_tarta	F	050-060	Adults (26-70)	Botanical Garden	19.02.2020	Bacteria	Bacillota_A	Clostridia	Clostridiales	Clostridiaceae	Clostridium	Clostridium	ASV_ASV55	1.70749
1236688F1225697	19F_tarta	F	005-006	Juveniles (2-25)	Botanical Garden	2022	Bacteria	Bacillota_A	Clostridia	Clostridiales	Clostridiaceae	Clostridium	Clostridium	ASV_ASV259	1.70574
1236696F1225705	20C_tarta	F	040-050	Adults (26-70)	Curieuse	16.02.2020	Bacteria	Bacillota_A	Clostridia	Clostridiales	Clostridiaceae	Clostridium	Clostridium	ASV_ASV86	1.70307
1236670F1225679	4Na_tarta	Not determined	002-003	Juveniles (2-25)	Curieuse (Nursery)	17.02.2020	Bacteria	Bacillota	Bacilli	Bacillales	DSM-1321	Bacillus_AD	Bacillus_AD	ASV_ASV29	1.69905
1236661F1225670	9BG_tarta	M	090-100	Elderly (71-100)	Botanical Garden	18.02.2020	Bacteria	Bacillota_A	Clostridia	Clostridiales	Clostridiaceae			ASV_ASV11	1.69821
1236677F1225686	1N_tarta	Not determined	001-002	Juveniles (2-25)	Curieuse (Nursery)	17.02.2020	Bacteria	Bacillota	Bacilli	Bacillales	Planococcaceae	Solibacillus	Solibacillus	ASV_ASV195	1.69816
1236691F1225700	31F_tarta	Not determined	004-005	Juveniles (2-25)	Private Garden	2022	Bacteria	Bacillota_A	Clostridia	Clostridiales	Clostridiaceae	Clostridium	Clostridium	ASV_ASV44	1.69766
1236682F1225691	25F_tarta	Not determined	005 -	Juveniles (2-25)	Curieuse (Nursery)	2022	Bacteria	Bacillota_A	Clostridia	Clostridiales	Clostridiaceae	Clostridium	Clostridium	ASV_ASV168	1.69744
1236664F1225673	12GH_tarta (=20C)	F	040-050	Adults (26-70)	Curieuse	15.02.2020	Bacteria	Bacteroidota	Bacteroidia	Bacteroidales	Bacteroidaceae	Bacteroides_H	Bacteroides_H	ASV_ASV30	1.69738
1236684F1225693	27_tarta	Not determined	001-002	Juveniles (2-25)	Curieuse (Nursery)	2022	Bacteria	Bacillota_A	Clostridia	Clostridiales	Clostridiaceae	Clostridium	Clostridium	ASV_ASV78	1.69458
1236657F1225666	�	F	030-040	Adults (26-70)	Curieuse	14.02.2020	Bacteria	Bacteroidota	Bacteroidia	Bacteroidales				ASV_ASV13	1.69349
1236709F1225718	BULBO_tarta	M	100 +	Centenarians (101+)	Parco Natura Viva	21.06.2021	Bacteria	Bacillota_A	Clostridia	Lachnospirales	Lachnospiraceae			ASV_ASV45	1.6894
1236665F1225674	23C_tarta	M	100 +	Centenarians (101+)	Curieuse	16.02.2020	Bacteria	Bacillota_A	Clostridia	Lachnospirales	Lachnospiraceae			ASV_ASV2	1.67588
1236677F1225686	1N_tarta	Not determined	001-002	Juveniles (2-25)	Curieuse (Nursery)	17.02.2020	Bacteria	Bacillota	Bacilli	Bacillales				ASV_ASV741	1.67566
1236706F1225715	7BG_tarta	F	050-060	Adults (26-70)	Botanical Garden	19.02.2020	Bacteria	Bacteroidota	Bacteroidia	Bacteroidales				ASV_ASV72	1.67228
1236704F1225713	5BG_tarta	M	080-090	Elderly (71-100)	Botanical Garden	19.02.2020	Bacteria	Bacteroidota	Bacteroidia	Bacteroidales				ASV_ASV12	1.66779
1236669F1225678	17C_tarta	M	060-070	Adults (26-70)	Curieuse	15.02.2020	Bacteria	Bacteroidota	Bacteroidia	Bacteroidales	UBA932	Bact-08	Bact-08	ASV_ASV5	1.6677
1236709F1225718	BULBO_tarta	M	100 +	Centenarians (101+)	Parco Natura Viva	21.06.2021	Bacteria	Bacillota_A	Clostridia	Clostridiales	Clostridiaceae			ASV_ASV129	1.66618
1236684F1225693	27_tarta	Not determined	001-002	Juveniles (2-25)	Curieuse (Nursery)	2022	Bacteria	Bacillota	Bacilli	Bacillales	DSM-1321	Bacillus_AD	Bacillus_AD	ASV_ASV35	1.66458
1236679F1225688	3N_tarta	Not determined	002-003	Juveniles (2-25)	Curieuse (Nursery)	17.02.2020	Bacteria	Pseudomonadota	Gammaproteobacteria	Burkholderiales				ASV_ASV128	1.66213
1236701F1225710	2BG_tarta	F	040-050	Adults (26-70)	Botanical Garden	19.02.2020	Bacteria	Fibrobacterota	Chitinivibrionia	Chitinivibrionales	Chitinispirillaceae	JAAYPC01	JAAYPC01	ASV_ASV39	1.66212
1236686F1225695	17F_tarta	M	080-090	Elderly (71-100)	Botanical Garden	2022	Bacteria	Bacteroidota	Bacteroidia	Bacteroidales				ASV_ASV4	1.66129
1236674F1225683	n8_tarta	Not determined	004-005	Juveniles (2-25)	Curieuse (Nursery)	14.02.2020	Bacteria	Bacillota	Bacilli	Bacillales	DSM-1321	Bacillus_AD	Bacillus_AD	ASV_ASV6	1.65737
1236658F1225667	24C_tarta	F	030-040	Adults (26-70)	Curieuse	16.02.2020	Bacteria	Bacteroidota	Bacteroidia	Bacteroidales				ASV_ASV13	1.65659
1236683F1225692	26_tarta	Not determined	001-002	Juveniles (2-25)	Curieuse (Nursery)	2022	Bacteria	Bacteroidota	Bacteroidia	Bacteroidales	UBA932	Bact-08	Bact-08	ASV_ASV5	1.65529
1236679F1225688	3N_tarta	Not determined	002-003	Juveniles (2-25)	Curieuse (Nursery)	17.02.2020	Bacteria	Bacillota_A	Clostridia	Christensenellales	UBA1242			ASV_ASV198	1.65448
1236675F1225684	n9_tarta	M	070-080	Elderly (71-100)	Curieuse	15.02.2020	Bacteria	Bacillota_A	Clostridia	Oscillospirales				ASV_ASV179	1.65106
1236688F1225697	19F_tarta	F	005-006	Juveniles (2-25)	Botanical Garden	2022	Bacteria	Bacillota_A	Clostridia	Clostridiales	Clostridiaceae	Inconstantimicrobium	Inconstantimicrobium	ASV_ASV232	1.65036
1236682F1225691	25F_tarta	Not determined	005 -	Juveniles (2-25)	Curieuse (Nursery)	2022	Bacteria	Bacillota	Bacilli	Bacillales	Planococcaceae			ASV_ASV91	1.64536
1236664F1225673	12GH_tarta (=20C)	F	040-050	Adults (26-70)	Curieuse	15.02.2020	Bacteria	Bacillota_A	Clostridia	TANB77	CAG-508	Scatovivens	Scatovivens	ASV_ASV270	1.63965
1236684F1225693	27_tarta	Not determined	001-002	Juveniles (2-25)	Curieuse (Nursery)	2022	Bacteria	Bacillota_A	Clostridia	Lachnospirales	Cellulosilyticaceae	Cellulosilyticum	Cellulosilyticum	ASV_ASV134	1.63959
1236684F1225693	27_tarta	Not determined	001-002	Juveniles (2-25)	Curieuse (Nursery)	2022	Bacteria	Bacillota_A	Clostridia	Lachnospirales	Lachnospiraceae			ASV_ASV57	1.63459
1236661F1225670	9BG_tarta	M	090-100	Elderly (71-100)	Botanical Garden	18.02.2020	Bacteria	Spirochaetota	Spirochaetia	Treponematales	Treponemataceae	Treponema_C	Treponema_C	ASV_ASV15	1.63342
1236692F1225701	7_tarta	F	015 -	Juveniles (2-25)	Parco Natura Viva	21.06.2021	Bacteria	Bacillota_A	Clostridia	Peptostreptococcales	Peptostreptococcaceae	Terrisporobacter	Terrisporobacter	ASV_ASV10	1.62032
1236707F1225716	8BG_tarta	M	100 +	Centenarians (101+)	Botanical Garden	19.02.2020	Bacteria	Bacillota_A	Clostridia	Oscillospirales	Oscillospiraceae	UBA1774	UBA1774	ASV_ASV62	1.61776
1236657F1225666	�	F	030-040	Adults (26-70)	Curieuse	14.02.2020	Bacteria	Bacillota_A	Clostridia	Clostridiales	Clostridiaceae	Clostridium_AA	Clostridium_AA	ASV_ASV99	1.61735
1236666F1225675	27C_tarta	M	080-090	Elderly (71-100)	Curieuse	16.02.2020	Bacteria	Bacteroidota	Bacteroidia	Bacteroidales	UBA932	Coprenecus	Coprenecus	ASV_ASV3	1.6145
1236665F1225674	23C_tarta	M	100 +	Centenarians (101+)	Curieuse	16.02.2020	Bacteria	Bacillota_A	Clostridia	Clostridiales	Clostridiaceae	Clostridium	Clostridium	ASV_ASV9	1.60634
1236682F1225691	25F_tarta	Not determined	005 -	Juveniles (2-25)	Curieuse (Nursery)	2022	Bacteria	Bacillota_A	Clostridia	Lachnospirales	Lachnospiraceae			ASV_ASV2	1.59564
1236696F1225705	20C_tarta	F	040-050	Adults (26-70)	Curieuse	16.02.2020	Bacteria	Bacillota_A	Clostridia	Lachnospirales	Lachnospiraceae			ASV_ASV14	1.592
1236703F1225712	4BG_tarta	M	030-040	Adults (26-70)	Botanical Garden	19.02.2020	Bacteria	Bacteroidota	Bacteroidia	Bacteroidales	WCHB1-69	UBA5429	UBA5429	ASV_ASV18	1.58915
1236697F1225706	21C_tarta	M	080-090	Elderly (71-100)	Curieuse	16.02.2020	Bacteria	Spirochaetota	Spirochaetia	Treponematales	Treponemataceae	Treponema_C	Treponema_C	ASV_ASV15	1.5857
1236680F1225689	4N_tarta	Not determined	2	Juveniles (2-25)	Curieuse (Nursery)	17.02.2020	Bacteria	Pseudomonadota	Gammaproteobacteria	Xanthomonadales	Xanthomonadaceae	Stenotrophomonas	Stenotrophomonas	ASV_ASV263	1.57706
1236703F1225712	4BG_tarta	M	030-040	Adults (26-70)	Botanical Garden	19.02.2020	Bacteria	Bacteroidota	Bacteroidia	Bacteroidales	WCHB1-69	UBA5429	UBA5429	ASV_ASV21	1.57703
1236659F1225668	28C_tarta	M	080-090	Elderly (71-100)	Curieuse	16.02.2020	Bacteria	Bacteroidota	Bacteroidia	Bacteroidales	UBA932			ASV_ASV65	1.57505
1236662F1225671	n2_tarta	M	070-080	Elderly (71-100)	Curieuse	14.02.2020	Bacteria							ASV_ASV73	1.5748
1236695F1225704	11_tarta	F	015 -	Juveniles (2-25)	Parco Natura Viva	21.06.2021	Bacteria	Bacillota	Bacilli	Bacillales	DSM-1321	Bacillus_AD	Bacillus_AD	ASV_ASV6	1.57312
1236673F1225682	n6_tarta	M	070-080	Elderly (71-100)	Curieuse	14.02.2020	Bacteria	Actinomycetota	Actinomycetia	Actinomycetales	Brevibacteriaceae	Brevibacterium	Brevibacterium	ASV_ASV162	1.56977
1236664F1225673	12GH_tarta (=20C)	F	040-050	Adults (26-70)	Curieuse	15.02.2020	Bacteria	Bacillota_A	Clostridia	Oscillospirales	Butyricicoccaceae	Butyricicoccus_A	Butyricicoccus_A	ASV_ASV147	1.56806
1236688F1225697	19F_tarta	F	005-006	Juveniles (2-25)	Botanical Garden	2022	Bacteria	Bacillota_A	Clostridia	Clostridiales	Clostridiaceae			ASV_ASV258	1.56175
1236691F1225700	31F_tarta	Not determined	004-005	Juveniles (2-25)	Private Garden	2022	Bacteria	Bacillota_A	Clostridia	Clostridiales	Clostridiaceae	Clostridium	Clostridium	ASV_ASV42	1.55903
1236678F1225687	2N_tarta	Not determined	002-003	Juveniles (2-25)	Curieuse (Nursery)	17.02.2020	Bacteria	Bacillota_A	Clostridia	Lachnospirales	Lachnospiraceae			ASV_ASV246	1.55698
1236707F1225716	8BG_tarta	M	100 +	Centenarians (101+)	Botanical Garden	19.02.2020	Bacteria	Bacillota_A	Clostridia	Clostridiales	Clostridiaceae	Clostridium	Clostridium	ASV_ASV8	1.55432
1236657F1225666	�	F	030-040	Adults (26-70)	Curieuse	14.02.2020	Bacteria	Bacillota_A	Clostridia	Lachnospirales	Lachnospiraceae			ASV_ASV14	1.54646
1236664F1225673	12GH_tarta (=20C)	F	040-050	Adults (26-70)	Curieuse	15.02.2020	Bacteria	Bacillota	Bacilli	Lactobacillales	Streptococcaceae	Streptococcus	Streptococcus	ASV_ASV334	1.54265
1236682F1225691	25F_tarta	Not determined	005 -	Juveniles (2-25)	Curieuse (Nursery)	2022	Bacteria	Bacillota_A	Clostridia	Lachnospirales	Lachnospiraceae			ASV_ASV14	1.54119
1236698F1225707	22C_tarta	M	090-100	Elderly (71-100)	Curieuse	16.02.2020	Bacteria	Bacillota_A	Clostridia	Peptostreptococcales	Peptostreptococcaceae	Terrisporobacter	Terrisporobacter	ASV_ASV10	1.53754
1236683F1225692	26_tarta	Not determined	001-002	Juveniles (2-25)	Curieuse (Nursery)	2022	Bacteria	Bacillota_A	Clostridia	Lachnospirales	Lachnospiraceae			ASV_ASV69	1.53652
1236693F1225702	8_tarta	F	100 +	Centenarians (101+)	Parco Natura Viva	21.06.2021	Bacteria	Bacillota_A	Clostridia	Peptostreptococcales	Peptostreptococcaceae			ASV_ASV160	1.53357
1236673F1225682	n6_tarta	M	070-080	Elderly (71-100)	Curieuse	14.02.2020	Bacteria	Bacteroidota	Bacteroidia	Bacteroidales				ASV_ASV13	1.53336
1236689F1225698	29F_tarta	Not determined	004-005	Juveniles (2-25)	Private Garden	2022	Bacteria	Bacteroidota	Bacteroidia	Bacteroidales	UBA932	Bact-08	Bact-08	ASV_ASV5	1.53299
1236672F1225681	10BG_tarta	M	040-050	Adults (26-70)	Botanical Garden	19.02.2020	Bacteria	Spirochaetota	Spirochaetia	Treponematales	Treponemataceae	Treponema_C	Treponema_C	ASV_ASV15	1.53231
1236664F1225673	12GH_tarta (=20C)	F	040-050	Adults (26-70)	Curieuse	15.02.2020	Bacteria	Bacillota_A	Clostridia	Lachnospirales	Lachnospiraceae	Coprococcus_A	Coprococcus_A	ASV_ASV386	1.5288
1236689F1225698	29F_tarta	Not determined	004-005	Juveniles (2-25)	Private Garden	2022	Bacteria	Bacillota_A	Clostridia	Lachnospirales	Cellulosilyticaceae	Cellulosilyticum	Cellulosilyticum	ASV_ASV75	1.52526
1236680F1225689	4N_tarta	Not determined	2	Juveniles (2-25)	Curieuse (Nursery)	17.02.2020	Bacteria	Pseudomonadota	Gammaproteobacteria	Enterobacterales_A	Alteromonadaceae	Rheinheimera	Rheinheimera	ASV_ASV399	1.5233
1236674F1225683	n8_tarta	Not determined	004-005	Juveniles (2-25)	Curieuse (Nursery)	14.02.2020	Bacteria	Bacillota_A	Clostridia	Clostridiales	Clostridiaceae	Clostridium	Clostridium	ASV_ASV55	1.52098
1236671F1225680	ROGER_tarta	M	100 +	Centenarians (101+)	Parco Natura Viva	21.06.2021	Bacteria	Bacillota_A	Clostridia	Peptostreptococcales	Peptostreptococcaceae	Terrisporobacter	Terrisporobacter	ASV_ASV10	1.52079
1236708F1225717	15C_tarta	M	080-090	Elderly (71-100)	Curieuse	15.02.2020	Bacteria	Bacillota_A	Clostridia	Lachnospirales	Lachnospiraceae			ASV_ASV17	1.5182
1236700F1225709	1BG_tarta	F	030-040	Adults (26-70)	Botanical Garden	19.02.2020	Bacteria	Bacteroidota	Bacteroidia	Bacteroidales	WCHB1-69	UBA5429	UBA5429	ASV_ASV21	1.51585
1236693F1225702	8_tarta	F	100 +	Centenarians (101+)	Parco Natura Viva	21.06.2021	Bacteria	Bacillota_A	Clostridia	Clostridiales	Clostridiaceae	Clostridium	Clostridium	ASV_ASV49	1.51464
1236681F1225690	24F_tarta	M	030-040	Adults (26-70)	Curieuse	2022	Bacteria	Bacteroidota	Bacteroidia	Bacteroidales				ASV_ASV4	1.51102
1236674F1225683	n8_tarta	Not determined	004-005	Juveniles (2-25)	Curieuse (Nursery)	14.02.2020	Bacteria	Bacillota_A	Clostridia	Lachnospirales	Lachnospiraceae			ASV_ASV2	1.50858
1236668F1225677	22F_tarta	M	080-090	Elderly (71-100)	Curieuse	2022	Bacteria	Bacteroidota	Bacteroidia	Bacteroidales	UBA932	Bact-08	Bact-08	ASV_ASV5	1.50688
1236688F1225697	19F_tarta	F	005-006	Juveniles (2-25)	Botanical Garden	2022	Bacteria	Bacillota_A	Clostridia	Lachnospirales	Lachnospiraceae			ASV_ASV332	1.50637
1236707F1225716	8BG_tarta	M	100 +	Centenarians (101+)	Botanical Garden	19.02.2020	Bacteria	Bacteroidota	Bacteroidia	Bacteroidales				ASV_ASV72	1.50278
1236703F1225712	4BG_tarta	M	030-040	Adults (26-70)	Botanical Garden	19.02.2020	Bacteria	Bacteroidota	Bacteroidia	Bacteroidales				ASV_ASV4	1.50194
1236703F1225712	4BG_tarta	M	030-040	Adults (26-70)	Botanical Garden	19.02.2020	Bacteria	Bacteroidota	Bacteroidia	Bacteroidales	UBA932			ASV_ASV89	1.50194
1236669F1225678	17C_tarta	M	060-070	Adults (26-70)	Curieuse	15.02.2020	Bacteria	Bacillota_A	Clostridia	Peptostreptococcales	Peptostreptococcaceae	Terrisporobacter	Terrisporobacter	ASV_ASV10	1.50012
1236703F1225712	4BG_tarta	M	030-040	Adults (26-70)	Botanical Garden	19.02.2020	Bacteria	Bacillota_A	Clostridia	Lachnospirales	Lachnospiraceae			ASV_ASV170	1.49952
1236680F1225689	4N_tarta	Not determined	2	Juveniles (2-25)	Curieuse (Nursery)	17.02.2020	Bacteria	Bacillota_A	Clostridia	Lachnospirales	Lachnospiraceae			ASV_ASV14	1.4994
1236676F1225685	n10_tarta	M	090-100	Elderly (71-100)	Curieuse	15.02.2020	Bacteria	Bacillota_A	Clostridia	Clostridiales	Clostridiaceae	Clostridium	Clostridium	ASV_ASV20	1.49535
1236707F1225716	8BG_tarta	M	100 +	Centenarians (101+)	Botanical Garden	19.02.2020	Bacteria	Bacteroidota	Bacteroidia	Bacteroidales	Bacteroidaceae			ASV_ASV60	1.49485
1236661F1225670	9BG_tarta	M	090-100	Elderly (71-100)	Botanical Garden	18.02.2020	Bacteria	Bacillota_A	Clostridia	Lachnospirales	Lachnospiraceae			ASV_ASV2	1.49361
1236681F1225690	24F_tarta	M	030-040	Adults (26-70)	Curieuse	2022	Bacteria	Bacillota_A	Clostridia	Clostridiales	Clostridiaceae	Clostridium	Clostridium	ASV_ASV8	1.49351
1236691F1225700	31F_tarta	Not determined	004-005	Juveniles (2-25)	Private Garden	2022	Bacteria	Actinomycetota	Actinomycetia	Actinomycetales	Microbacteriaceae	WSTA01	WSTA01	ASV_ASV385	1.49292
1236663F1225672	19N_tarta	Not determined	004-005	Juveniles (2-25)	Curieuse (Nursery)	15.02.2020	Bacteria	Bacteroidota	Bacteroidia	Bacteroidales				ASV_ASV46	1.4897
1236680F1225689	4N_tarta	Not determined	2	Juveniles (2-25)	Curieuse (Nursery)	17.02.2020	Bacteria	Bacillota	Bacilli	Bacillales	DSM-1321	Bacillus_AD	Bacillus_AD	ASV_ASV29	1.48746
1236678F1225687	2N_tarta	Not determined	002-003	Juveniles (2-25)	Curieuse (Nursery)	17.02.2020	Bacteria	Bacillota	Bacilli	Bacillales	DSM-1321	Bacillus_AD	Bacillus_AD	ASV_ASV6	1.48734
1236660F1225669	30C_tarta	M	090-100	Elderly (71-100)	Curieuse	17.02.2020	Bacteria	Bacteroidota	Bacteroidia	Bacteroidales	UBA932	Bact-08	Bact-08	ASV_ASV5	1.4851
1236677F1225686	1N_tarta	Not determined	001-002	Juveniles (2-25)	Curieuse (Nursery)	17.02.2020	Bacteria	Bacteroidota	Bacteroidia	Flavobacteriales	Flavobacteriaceae	Flavobacterium	Flavobacterium	ASV_ASV542	1.48448
1236663F1225672	19N_tarta	Not determined	004-005	Juveniles (2-25)	Curieuse (Nursery)	15.02.2020	Bacteria	Bacillota_A	Clostridia	Clostridiales	Clostridiaceae	Clostridium	Clostridium	ASV_ASV55	1.482
1236704F1225713	5BG_tarta	M	080-090	Elderly (71-100)	Botanical Garden	19.02.2020	Bacteria	Bacillota_A	Clostridia	Clostridiales	Clostridiaceae	Clostridium	Clostridium	ASV_ASV105	1.46775
1236677F1225686	1N_tarta	Not determined	001-002	Juveniles (2-25)	Curieuse (Nursery)	17.02.2020	Bacteria	Bacillota	Bacilli	Bacillales				ASV_ASV665	1.46761
1236675F1225684	n9_tarta	M	070-080	Elderly (71-100)	Curieuse	15.02.2020	Bacteria	Bacillota_A	Clostridia	Peptostreptococcales	Peptostreptococcaceae	Terrisporobacter	Terrisporobacter	ASV_ASV10	1.46728
1236669F1225678	17C_tarta	M	060-070	Adults (26-70)	Curieuse	15.02.2020	Bacteria	Bacteroidota	Bacteroidia	Bacteroidales	UBA932	Bact-08	Bact-08	ASV_ASV22	1.46228
1236657F1225666	�	F	030-040	Adults (26-70)	Curieuse	14.02.2020	Bacteria	Fibrobacterota	Chitinivibrionia	Chitinivibrionales	Chitinispirillaceae	JAAYPC01	JAAYPC01	ASV_ASV39	1.45982
1236676F1225685	n10_tarta	M	090-100	Elderly (71-100)	Curieuse	15.02.2020	Bacteria	Bacteroidota	Kapabacteria	Kapabacteriales				ASV_ASV33	1.45765
1236663F1225672	19N_tarta	Not determined	004-005	Juveniles (2-25)	Curieuse (Nursery)	15.02.2020	Bacteria	Bacillota_A	Clostridia	Oscillospirales	Ruminococcaceae	Anaerofilum	Anaerofilum	ASV_ASV109	1.45117
1236693F1225702	8_tarta	F	100 +	Centenarians (101+)	Parco Natura Viva	21.06.2021	Bacteria	Pseudomonadota	Gammaproteobacteria	Pseudomonadales	Moraxellaceae	Acinetobacter	Acinetobacter	ASV_ASV143	1.45026
1236685F1225694	16F_tarta	M	080-090	Elderly (71-100)	Botanical Garden	2022	RS_GCF_001729965.1~NZ_JRWK01000030.1 Archaea	Methanobacteriota	Methanobacteria	Methanobacteriales	Methanobacteriaceae	Methanosphaera	Methanosphaera sp001729965 [location=1..1480] [ssu_len=1480] [contig_len=1498]	ASV_ASV41	1.4484
1236674F1225683	n8_tarta	Not determined	004-005	Juveniles (2-25)	Curieuse (Nursery)	14.02.2020	Bacteria	Bacillota_A	Clostridia	TANB77	CAG-508	Scatovivens	Scatovivens	ASV_ASV266	1.44658
1236695F1225704	11_tarta	F	015 -	Juveniles (2-25)	Parco Natura Viva	21.06.2021	Bacteria	Bacillota_A	Clostridia	Clostridiales	Clostridiaceae			ASV_ASV129	1.44153
1236699F1225708	31C_tarta	Not determined	004-005	Juveniles (2-25)	Curieuse (Nursery)	17.02.2020	Bacteria	Bacteroidota	Bacteroidia	Bacteroidales				ASV_ASV4	1.43995
1236676F1225685	n10_tarta	M	090-100	Elderly (71-100)	Curieuse	15.02.2020	Bacteria							ASV_ASV152	1.4388
1236675F1225684	n9_tarta	M	070-080	Elderly (71-100)	Curieuse	15.02.2020	Bacteria	Bacteroidota	Bacteroidia	Bacteroidales	UBA932	Bact-08	Bact-08	ASV_ASV22	1.43763
1236699F1225708	31C_tarta	Not determined	004-005	Juveniles (2-25)	Curieuse (Nursery)	17.02.2020	Bacteria	Bacillota_A	Clostridia	TANB77	CAG-508	Scatovivens	Scatovivens	ASV_ASV266	1.43689
1236659F1225668	28C_tarta	M	080-090	Elderly (71-100)	Curieuse	16.02.2020	Bacteria	Bacteroidota	Kapabacteria	Kapabacteriales				ASV_ASV33	1.43477
1236684F1225693	27_tarta	Not determined	001-002	Juveniles (2-25)	Curieuse (Nursery)	2022	Bacteria	Bacillota_A	Clostridia	Lachnospirales	Lachnospiraceae			ASV_ASV150	1.43464
1236681F1225690	24F_tarta	M	030-040	Adults (26-70)	Curieuse	2022	Bacteria	Bacteroidota	Bacteroidia	Bacteroidales	WCHB1-69	UBA5429	UBA5429	ASV_ASV18	1.42846
1236670F1225679	4Na_tarta	Not determined	002-003	Juveniles (2-25)	Curieuse (Nursery)	17.02.2020	Bacteria	Bacillota_A	Clostridia	Lachnospirales	Lachnospiraceae			ASV_ASV17	1.42595
1236660F1225669	30C_tarta	M	090-100	Elderly (71-100)	Curieuse	17.02.2020	Bacteria	Bacillota_A	Clostridia	Lachnospirales	Lachnospiraceae			ASV_ASV14	1.42458
1236708F1225717	15C_tarta	M	080-090	Elderly (71-100)	Curieuse	15.02.2020	Bacteria	Bacillota_A	Clostridia	Lachnospirales	Lachnospiraceae			ASV_ASV2	1.42453
1236700F1225709	1BG_tarta	F	030-040	Adults (26-70)	Botanical Garden	19.02.2020	Bacteria	Fibrobacterota	Chitinivibrionia	Chitinivibrionales	Chitinispirillaceae	JAAYPC01	JAAYPC01	ASV_ASV39	1.42312
1236677F1225686	1N_tarta	Not determined	001-002	Juveniles (2-25)	Curieuse (Nursery)	17.02.2020	Bacteria	Pseudomonadota	Gammaproteobacteria	Burkholderiales				ASV_ASV128	1.42263
1236692F1225701	7_tarta	F	015 -	Juveniles (2-25)	Parco Natura Viva	21.06.2021	Bacteria	Bacteroidota	Bacteroidia	Bacteroidales	WCHB1-69	UBA5429	UBA5429	ASV_ASV18	1.42239
1236666F1225675	27C_tarta	M	080-090	Elderly (71-100)	Curieuse	16.02.2020	Bacteria	Bacteroidota	Bacteroidia	Bacteroidales				ASV_ASV13	1.42045
1236658F1225667	24C_tarta	F	030-040	Adults (26-70)	Curieuse	16.02.2020	Bacteria	Bacteroidota	Bacteroidia	Bacteroidales	UBA932	Bact-08	Bact-08	ASV_ASV5	1.4193
1236681F1225690	24F_tarta	M	030-040	Adults (26-70)	Curieuse	2022	Bacteria	Bacteroidota	Bacteroidia	Bacteroidales	UBA932	Coprenecus	Coprenecus	ASV_ASV3	1.41846
1236677F1225686	1N_tarta	Not determined	001-002	Juveniles (2-25)	Curieuse (Nursery)	17.02.2020	Bacteria	Pseudomonadota	Gammaproteobacteria	Pseudomonadales	Pseudomonadaceae	Halopseudomonas	Halopseudomonas	ASV_ASV831	1.41138
1236679F1225688	3N_tarta	Not determined	002-003	Juveniles (2-25)	Curieuse (Nursery)	17.02.2020	Bacteria	Bacillota	Bacilli	Bacillales	DSM-1321	Bacillus_AD	Bacillus_AD	ASV_ASV6	1.40937
1236686F1225695	17F_tarta	M	080-090	Elderly (71-100)	Botanical Garden	2022	Bacteria	Bacillota_A	Clostridia	Clostridiales	Clostridiaceae	Clostridium	Clostridium	ASV_ASV64	1.40907
1236681F1225690	24F_tarta	M	030-040	Adults (26-70)	Curieuse	2022	Bacteria	Bacteroidota	Bacteroidia	Bacteroidales	Bacteroidaceae	Bacteroides_H	Bacteroides_H	ASV_ASV30	1.40845
1236658F1225667	24C_tarta	F	030-040	Adults (26-70)	Curieuse	16.02.2020	Bacteria	Bacillota_A	Clostridia	Clostridiales	Clostridiaceae	Clostridium	Clostridium	ASV_ASV20	1.40587
1236684F1225693	27_tarta	Not determined	001-002	Juveniles (2-25)	Curieuse (Nursery)	2022	Bacteria	Bacteroidota	Bacteroidia	Bacteroidales	Bacteroidaceae	Bacteroides_H	Bacteroides_H	ASV_ASV30	1.40465
1236666F1225675	27C_tarta	M	080-090	Elderly (71-100)	Curieuse	16.02.2020	Bacteria	Bacillota	Bacilli	Bacillales	DSM-1321	Bacillus_AD	Bacillus_AD	ASV_ASV71	1.40298
1236686F1225695	17F_tarta	M	080-090	Elderly (71-100)	Botanical Garden	2022								ASV_ASV51	1.40234
1236695F1225704	11_tarta	F	015 -	Juveniles (2-25)	Parco Natura Viva	21.06.2021	Bacteria	Bacillota_A	Clostridia	Clostridiales	Clostridiaceae	Clostridium	Clostridium	ASV_ASV103	1.40225
1236658F1225667	24C_tarta	F	030-040	Adults (26-70)	Curieuse	16.02.2020	Bacteria	Bacillota_A	Clostridia	Lachnospirales	Lachnospiraceae			ASV_ASV2	1.40139
1236700F1225709	1BG_tarta	F	030-040	Adults (26-70)	Botanical Garden	19.02.2020	Bacteria	Bacteroidota	Bacteroidia	Bacteroidales	WCHB1-69	UBA5429	UBA5429	ASV_ASV18	1.39815
1236704F1225713	5BG_tarta	M	080-090	Elderly (71-100)	Botanical Garden	19.02.2020	Bacteria	Bacteroidota	Bacteroidia	Bacteroidales				ASV_ASV272	1.39786
1236666F1225675	27C_tarta	M	080-090	Elderly (71-100)	Curieuse	16.02.2020	Bacteria	Bacillota	Bacilli	Bacillales	DSM-1321	Bacillus_AD	Bacillus_AD	ASV_ASV84	1.39522
1236709F1225718	BULBO_tarta	M	100 +	Centenarians (101+)	Parco Natura Viva	21.06.2021	Bacteria	Bacillota_A	Clostridia	Clostridiales	Clostridiaceae	Clostridium	Clostridium	ASV_ASV74	1.39332
1236668F1225677	22F_tarta	M	080-090	Elderly (71-100)	Curieuse	2022	Bacteria	Bacillota_A	Clostridia	Lachnospirales	Lachnospiraceae			ASV_ASV2	1.3924
1236690F1225699	30F_tarta	Not determined	004-005	Juveniles (2-25)	Private Garden	2022	Bacteria	Bacillota_A	Clostridia	Clostridiales	Clostridiaceae	Clostridium	Clostridium	ASV_ASV44	1.38982
1236684F1225693	27_tarta	Not determined	001-002	Juveniles (2-25)	Curieuse (Nursery)	2022	Bacteria	Bacteroidota	Bacteroidia	Bacteroidales	UBA932			ASV_ASV83	1.38965
1236705F1225714	6BG_tarta	M	040-050	Adults (26-70)	Botanical Garden	19.02.2020	Bacteria	Bacillota_A	Clostridia	Lachnospirales	Lachnospiraceae			ASV_ASV2	1.38781
1236675F1225684	n9_tarta	M	070-080	Elderly (71-100)	Curieuse	15.02.2020	Bacteria	Riflebacteria	Ozemobacteria	Ozemobacterales	Ozemobacteraceae	Rifleibacterium	Rifleibacterium	ASV_ASV102	1.38724
1236677F1225686	1N_tarta	Not determined	001-002	Juveniles (2-25)	Curieuse (Nursery)	17.02.2020	Bacteria	Bacteroidota	Bacteroidia	Flavobacteriales	Flavobacteriaceae	Flavobacterium	Flavobacterium	ASV_ASV838	1.38327
1236660F1225669	30C_tarta	M	090-100	Elderly (71-100)	Curieuse	17.02.2020	Bacteria	Bacillota_A	Clostridia	Lachnospirales	Lachnospiraceae			ASV_ASV17	1.38268
1236657F1225666	�	F	030-040	Adults (26-70)	Curieuse	14.02.2020	Bacteria	Bacillota_A	Clostridia	Clostridiales	Clostridiaceae	Clostridium	Clostridium	ASV_ASV20	1.38105
1236674F1225683	n8_tarta	Not determined	004-005	Juveniles (2-25)	Curieuse (Nursery)	14.02.2020	Bacteria	Bacteroidota	Bacteroidia	Bacteroidales	UBA932			ASV_ASV65	1.37632
1236689F1225698	29F_tarta	Not determined	004-005	Juveniles (2-25)	Private Garden	2022	Bacteria	Bacillota_A	Clostridia	Lachnospirales	Lachnospiraceae	Velocimicrobium	Velocimicrobium	ASV_ASV116	1.36552
1236657F1225666	�	F	030-040	Adults (26-70)	Curieuse	14.02.2020								ASV_ASV34	1.3653
1236665F1225674	23C_tarta	M	100 +	Centenarians (101+)	Curieuse	16.02.2020	Bacteria	Bacillota_A	Clostridia	Oscillospirales	Ruminococcaceae	HUN007	HUN007	ASV_ASV16	1.3647
1236709F1225718	BULBO_tarta	M	100 +	Centenarians (101+)	Parco Natura Viva	21.06.2021	Bacteria	Bacillota_A	Clostridia	Lachnospirales	Cellulosilyticaceae	Cellulosilyticum	Cellulosilyticum	ASV_ASV75	1.3643
1236683F1225692	26_tarta	Not determined	001-002	Juveniles (2-25)	Curieuse (Nursery)	2022	Bacteria	Bacillota_A	Clostridia	Lachnospirales	Lachnospiraceae			ASV_ASV48	1.36332
1236662F1225671	n2_tarta	M	070-080	Elderly (71-100)	Curieuse	14.02.2020	Bacteria	Bacillota_A	Clostridia	Clostridiales	Clostridiaceae	Clostridium_AA	Clostridium_AA	ASV_ASV99	1.36314
1236691F1225700	31F_tarta	Not determined	004-005	Juveniles (2-25)	Private Garden	2022	Bacteria	Bacillota	Bacilli	Bacillales	Planococcaceae	Lysinibacillus	Lysinibacillus	ASV_ASV269	1.36282
1236675F1225684	n9_tarta	M	070-080	Elderly (71-100)	Curieuse	15.02.2020	Bacteria	Bacteroidota	Bacteroidia	Bacteroidales	UBA932			ASV_ASV65	1.36056
1236668F1225677	22F_tarta	M	080-090	Elderly (71-100)	Curieuse	2022	Bacteria	Bacillota	Bacilli	Bacillales	DSM-1321	Bacillus_AD	Bacillus_AD	ASV_ASV6	1.36045
1236657F1225666	�	F	030-040	Adults (26-70)	Curieuse	14.02.2020	Bacteria	Bacillota_A	Clostridia	Lachnospirales	Lachnospiraceae			ASV_ASV188	1.35742
1236658F1225667	24C_tarta	F	030-040	Adults (26-70)	Curieuse	16.02.2020	Bacteria							ASV_ASV73	1.35662
1236673F1225682	n6_tarta	M	070-080	Elderly (71-100)	Curieuse	14.02.2020	Bacteria	Bacteroidota	Kapabacteria	Kapabacteriales				ASV_ASV33	1.35534
1236692F1225701	7_tarta	F	015 -	Juveniles (2-25)	Parco Natura Viva	21.06.2021	Bacteria	Bacteroidota	Bacteroidia	Bacteroidales	WCHB1-69	UBA5429	UBA5429	ASV_ASV21	1.3553
1236664F1225673	12GH_tarta (=20C)	F	040-050	Adults (26-70)	Curieuse	15.02.2020	Bacteria	Bacillota_A	Clostridia	TANB77	CAG-508	Scatovivens	Scatovivens	ASV_ASV274	1.35098
1236701F1225710	2BG_tarta	F	040-050	Adults (26-70)	Botanical Garden	19.02.2020	Bacteria	Bacillota_A	Clostridia	Lachnospirales	Lachnospiraceae			ASV_ASV48	1.35066
1236706F1225715	7BG_tarta	F	050-060	Adults (26-70)	Botanical Garden	19.02.2020	Bacteria	Spirochaetota	Spirochaetia					ASV_ASV59	1.3504
1236698F1225707	22C_tarta	M	090-100	Elderly (71-100)	Curieuse	16.02.2020	Bacteria	Bacillota	Bacilli	Lactobacillales	Streptococcaceae	Streptococcus	Streptococcus	ASV_ASV242	1.34702
1236693F1225702	8_tarta	F	100 +	Centenarians (101+)	Parco Natura Viva	21.06.2021	Bacteria	Bacillota_A	Clostridia	Lachnospirales	Cellulosilyticaceae	Cellulosilyticum	Cellulosilyticum	ASV_ASV75	1.34424
1236706F1225715	7BG_tarta	F	050-060	Adults (26-70)	Botanical Garden	19.02.2020	Bacteria	Bacillota_A	Clostridia	Peptostreptococcales	Peptostreptococcaceae	Terrisporobacter	Terrisporobacter	ASV_ASV10	1.34286
1236706F1225715	7BG_tarta	F	050-060	Adults (26-70)	Botanical Garden	19.02.2020	Bacteria	Bacteroidota	Bacteroidia	Bacteroidales				ASV_ASV4	1.34286
1236659F1225668	28C_tarta	M	080-090	Elderly (71-100)	Curieuse	16.02.2020	Bacteria	Fibrobacterota	Fibrobacteria	Fibrobacterales	Fibrobacteraceae			ASV_ASV138	1.33911
1236689F1225698	29F_tarta	Not determined	004-005	Juveniles (2-25)	Private Garden	2022	Bacteria	Bacillota_A	Clostridia	Clostridiales	Clostridiaceae	Clostridium	Clostridium	ASV_ASV105	1.33718
1236661F1225670	9BG_tarta	M	090-100	Elderly (71-100)	Botanical Garden	18.02.2020	RS_GCF_001729965.1~NZ_JRWK01000030.1 Archaea	Methanobacteriota	Methanobacteria	Methanobacteriales	Methanobacteriaceae	Methanosphaera	Methanosphaera sp001729965 [location=1..1480] [ssu_len=1480] [contig_len=1498]	ASV_ASV41	1.33674
1236690F1225699	30F_tarta	Not determined	004-005	Juveniles (2-25)	Private Garden	2022	Bacteria	Bacillota_A	Clostridia	Clostridiales	Clostridiaceae	Inconstantimicrobium	Inconstantimicrobium	ASV_ASV38	1.33636
1236707F1225716	8BG_tarta	M	100 +	Centenarians (101+)	Botanical Garden	19.02.2020	Bacteria	Bacillota_A	Clostridia	Lachnospirales	Lachnospiraceae			ASV_ASV2	1.33228
1236657F1225666	�	F	030-040	Adults (26-70)	Curieuse	14.02.2020	Bacteria	Bacteroidota	Bacteroidia	Bacteroidales				ASV_ASV7	1.32854
1236677F1225686	1N_tarta	Not determined	001-002	Juveniles (2-25)	Curieuse (Nursery)	17.02.2020								ASV_ASV82	1.32704
1236671F1225680	ROGER_tarta	M	100 +	Centenarians (101+)	Parco Natura Viva	21.06.2021								ASV_ASV34	1.32657
1236668F1225677	22F_tarta	M	080-090	Elderly (71-100)	Curieuse	2022	Bacteria	Bacillota_A	Clostridia	Lachnospirales	Lachnospiraceae			ASV_ASV25	1.32584
1236664F1225673	12GH_tarta (=20C)	F	040-050	Adults (26-70)	Curieuse	15.02.2020	Bacteria	Bacteroidota	Bacteroidia	Bacteroidales	UBA932	Bact-08	Bact-08	ASV_ASV22	1.32326
1236660F1225669	30C_tarta	M	090-100	Elderly (71-100)	Curieuse	17.02.2020	Bacteria	Bacillota_A	Clostridia	Lachnospirales	Lachnospiraceae	Velocimicrobium	Velocimicrobium	ASV_ASV40	1.32216
1236659F1225668	28C_tarta	M	080-090	Elderly (71-100)	Curieuse	16.02.2020	Bacteria	Bacillota	Bacilli	Bacillales	DSM-1321	Bacillus_AD	Bacillus_AD	ASV_ASV6	1.32211
1236687F1225696	18F_tarta	F	040-050	Adults (26-70)	Botanical Garden	2022	Bacteria	Bacteroidota	Bacteroidia	Bacteroidales	UBA932	Coprenecus	Coprenecus	ASV_ASV3	1.31648
1236670F1225679	4Na_tarta	Not determined	002-003	Juveniles (2-25)	Curieuse (Nursery)	17.02.2020	Bacteria	Bacteroidota	Bacteroidia	NS11-12g	UBA8524	SB11	SB11	ASV_ASV392	1.31626
1236682F1225691	25F_tarta	Not determined	005 -	Juveniles (2-25)	Curieuse (Nursery)	2022	Bacteria	Bacteroidota	Bacteroidia	Bacteroidales	UBA932	Bact-08	Bact-08	ASV_ASV5	1.31392
1236662F1225671	n2_tarta	M	070-080	Elderly (71-100)	Curieuse	14.02.2020	Bacteria	Pseudomonadota	Gammaproteobacteria	Enterobacterales_A	Succinivibrionaceae	Succinivibrio	Succinivibrio	ASV_ASV173	1.31234
1236683F1225692	26_tarta	Not determined	001-002	Juveniles (2-25)	Curieuse (Nursery)	2022	Bacteria	Bacteroidota	Bacteroidia	Bacteroidales	UBA932			ASV_ASV56	1.31136
1236688F1225697	19F_tarta	F	005-006	Juveniles (2-25)	Botanical Garden	2022	Bacteria	Bacillota_A	Clostridia	Peptostreptococcales	Peptostreptococcaceae	Terrisporobacter	Terrisporobacter	ASV_ASV10	1.31069
1236706F1225715	7BG_tarta	F	050-060	Adults (26-70)	Botanical Garden	19.02.2020	Bacteria	Spirochaetota	Spirochaetia	Treponematales	Treponemataceae	Treponema_C	Treponema_C	ASV_ASV15	1.31016
1236690F1225699	30F_tarta	Not determined	004-005	Juveniles (2-25)	Private Garden	2022	Bacteria	Bacillota	Bacilli	Bacillales	DSM-1321	Bacillus_AD	Bacillus_AD	ASV_ASV71	1.30964
1236660F1225669	30C_tarta	M	090-100	Elderly (71-100)	Curieuse	17.02.2020	Bacteria	Bacillota	Bacilli	Bacillales	DSM-1321	Bacillus_AD	Bacillus_AD	ASV_ASV35	1.30819
1236664F1225673	12GH_tarta (=20C)	F	040-050	Adults (26-70)	Curieuse	15.02.2020	Bacteria	Bacteroidota	Bacteroidia	Bacteroidales				ASV_ASV46	1.3071
1236668F1225677	22F_tarta	M	080-090	Elderly (71-100)	Curieuse	2022	Bacteria	Bacillota_A	Clostridia	Oscillospirales	Ruminococcaceae	HUN007	HUN007	ASV_ASV16	1.30454
1236685F1225694	16F_tarta	M	080-090	Elderly (71-100)	Botanical Garden	2022	Bacteria	Bacteroidota	Bacteroidia	Bacteroidales	Bacteroidaceae	43-108	43-108	ASV_ASV53	1.30356
1236669F1225678	17C_tarta	M	060-070	Adults (26-70)	Curieuse	15.02.2020	Bacteria	Bacteroidota	Bacteroidia	Bacteroidales	UBA932	Coprenecus	Coprenecus	ASV_ASV3	1.30281
1236691F1225700	31F_tarta	Not determined	004-005	Juveniles (2-25)	Private Garden	2022	Bacteria	Pseudomonadota	Gammaproteobacteria	Pseudomonadales	Pseudomonadaceae	Pseudomonas_H	Pseudomonas_H	ASV_ASV450	1.30097
1236676F1225685	n10_tarta	M	090-100	Elderly (71-100)	Curieuse	15.02.2020	Bacteria	Bacillota_A	Clostridia	Lachnospirales	Lachnospiraceae	Velocimicrobium	Velocimicrobium	ASV_ASV40	1.30058
1236671F1225680	ROGER_tarta	M	100 +	Centenarians (101+)	Parco Natura Viva	21.06.2021	Bacteria	Bacillota_A	Clostridia	Lachnospirales	Lachnospiraceae			ASV_ASV45	1.30024
1236689F1225698	29F_tarta	Not determined	004-005	Juveniles (2-25)	Private Garden	2022	Bacteria	Bacteroidota	Bacteroidia	Bacteroidales	WCHB1-69	UBA5429	UBA5429	ASV_ASV487	1.29853
1236684F1225693	27_tarta	Not determined	001-002	Juveniles (2-25)	Curieuse (Nursery)	2022	Bacteria	Bacillota_A	Clostridia	Lachnospirales	Lachnospiraceae			ASV_ASV108	1.29468
1236699F1225708	31C_tarta	Not determined	004-005	Juveniles (2-25)	Curieuse (Nursery)	17.02.2020	Bacteria	Pseudomonadota	Gammaproteobacteria	Enterobacterales_A	Succinivibrionaceae	Succinivibrio	Succinivibrio	ASV_ASV173	1.29289
1236695F1225704	11_tarta	F	015 -	Juveniles (2-25)	Parco Natura Viva	21.06.2021	Bacteria	Bacillota_A	Clostridia	Clostridiales	Clostridiaceae	Clostridium	Clostridium	ASV_ASV36	1.29227
1236688F1225697	19F_tarta	F	005-006	Juveniles (2-25)	Botanical Garden	2022	Bacteria	Bacillota_A	Clostridia	Clostridiales	Clostridiaceae	Clostridium	Clostridium	ASV_ASV8	1.29223
1236709F1225718	BULBO_tarta	M	100 +	Centenarians (101+)	Parco Natura Viva	21.06.2021	Bacteria	Bacteroidota	Bacteroidia	Bacteroidales	WCHB1-69	UBA5429	UBA5429	ASV_ASV21	1.28882
1236692F1225701	7_tarta	F	015 -	Juveniles (2-25)	Parco Natura Viva	21.06.2021	Bacteria	Bacillota_A	Clostridia	Lachnospirales	Lachnospiraceae			ASV_ASV28	1.2882
1236666F1225675	27C_tarta	M	080-090	Elderly (71-100)	Curieuse	16.02.2020	Bacteria	Bacillota_A	Clostridia	Peptostreptococcales	Peptostreptococcaceae	Terrisporobacter	Terrisporobacter	ASV_ASV10	1.28267
1236707F1225716	8BG_tarta	M	100 +	Centenarians (101+)	Botanical Garden	19.02.2020	Bacteria	Bacteroidota	Bacteroidia	Bacteroidales	WCHB1-69	UBA5429	UBA5429	ASV_ASV132	1.28073
1236697F1225706	21C_tarta	M	080-090	Elderly (71-100)	Curieuse	16.02.2020	Bacteria	Bacteroidota	Bacteroidia	Bacteroidales	Bacteroidaceae			ASV_ASV60	1.27958
1236664F1225673	12GH_tarta (=20C)	F	040-050	Adults (26-70)	Curieuse	15.02.2020	Bacteria	Chloroflexota	Anaerolineae	Anaerolineales	Anaerolineaceae	Flexilinea	Flexilinea	ASV_ASV180	1.27939
1236659F1225668	28C_tarta	M	080-090	Elderly (71-100)	Curieuse	16.02.2020	Bacteria	Bacillota_A	Clostridia	Peptostreptococcales	Peptostreptococcaceae	Terrisporobacter	Terrisporobacter	ASV_ASV10	1.27535
1236706F1225715	7BG_tarta	F	050-060	Adults (26-70)	Botanical Garden	19.02.2020	Bacteria	Bacteroidota	Bacteroidia	Bacteroidales	UBA932	Bact-08	Bact-08	ASV_ASV54	1.26993
1236705F1225714	6BG_tarta	M	040-050	Adults (26-70)	Botanical Garden	19.02.2020	Bacteria	Bacillota_A	Clostridia	Lachnospirales	Lachnospiraceae			ASV_ASV88	1.26934
1236670F1225679	4Na_tarta	Not determined	002-003	Juveniles (2-25)	Curieuse (Nursery)	17.02.2020	Bacteria	Bacteroidota	Bacteroidia	Chitinophagales	Chitinophagaceae	Edaphocola	Edaphocola	ASV_ASV393	1.26925
1236699F1225708	31C_tarta	Not determined	004-005	Juveniles (2-25)	Curieuse (Nursery)	17.02.2020	Bacteria	Bacillota_A	Clostridia	Peptostreptococcales	Peptostreptococcaceae	Terrisporobacter	Terrisporobacter	ASV_ASV10	1.26838
1236692F1225701	7_tarta	F	015 -	Juveniles (2-25)	Parco Natura Viva	21.06.2021	Bacteria	Bacillota_A	Clostridia	Oscillospirales	Ruminococcaceae	Ruminococcus_F	Ruminococcus_F	ASV_ASV416	1.26807
1236695F1225704	11_tarta	F	015 -	Juveniles (2-25)	Parco Natura Viva	21.06.2021	Bacteria	Bacillota_A	Clostridia	Peptostreptococcales	Peptostreptococcaceae	Terrisporobacter	Terrisporobacter	ASV_ASV10	1.26478
1236684F1225693	27_tarta	Not determined	001-002	Juveniles (2-25)	Curieuse (Nursery)	2022	Bacteria	Bacillota_A	Clostridia	Lachnospirales	Lachnospiraceae			ASV_ASV14	1.26468
1236697F1225706	21C_tarta	M	080-090	Elderly (71-100)	Curieuse	16.02.2020	Bacteria	Bacillota	Bacilli	Lactobacillales	Streptococcaceae	Streptococcus	Streptococcus	ASV_ASV242	1.26427
1236705F1225714	6BG_tarta	M	040-050	Adults (26-70)	Botanical Garden	19.02.2020	Bacteria	Bacillota_A	Clostridia	Clostridiales	Clostridiaceae			ASV_ASV140	1.26257
1236661F1225670	9BG_tarta	M	090-100	Elderly (71-100)	Botanical Garden	18.02.2020	Bacteria	Bacillota_A	Clostridia	Peptostreptococcales	Peptostreptococcaceae	Terrisporobacter	Terrisporobacter	ASV_ASV10	1.26172
1236670F1225679	4Na_tarta	Not determined	002-003	Juveniles (2-25)	Curieuse (Nursery)	17.02.2020	Bacteria	Bacillota	Bacilli	Staphylococcales	Staphylococcaceae	Staphylococcus	Staphylococcus	ASV_ASV381	1.2603
1236698F1225707	22C_tarta	M	090-100	Elderly (71-100)	Curieuse	16.02.2020	Bacteria							ASV_ASV73	1.25677
1236688F1225697	19F_tarta	F	005-006	Juveniles (2-25)	Botanical Garden	2022	RS_GCF_001729965.1~NZ_JRWK01000030.1 Archaea	Methanobacteriota	Methanobacteria	Methanobacteriales	Methanobacteriaceae	Methanosphaera	Methanosphaera sp001729965 [location=1..1480] [ssu_len=1480] [contig_len=1498]	ASV_ASV41	1.25531
1236709F1225718	BULBO_tarta	M	100 +	Centenarians (101+)	Parco Natura Viva	21.06.2021	Bacteria	Bacteroidota	Bacteroidia	Bacteroidales	WCHB1-69	UBA5429	UBA5429	ASV_ASV18	1.25399
1236698F1225707	22C_tarta	M	090-100	Elderly (71-100)	Curieuse	16.02.2020	Bacteria	Bacillota_A	Clostridia	Clostridiales	Clostridiaceae	Inconstantimicrobium	Inconstantimicrobium	ASV_ASV184	1.25343
1236672F1225681	10BG_tarta	M	040-050	Adults (26-70)	Botanical Garden	19.02.2020	Bacteria							ASV_ASV152	1.25134
1236692F1225701	7_tarta	F	015 -	Juveniles (2-25)	Parco Natura Viva	21.06.2021	Bacteria	Bacillota	Bacilli	Bacillales	DSM-1321	Bacillus_AD	Bacillus_AD	ASV_ASV6	1.2513
1236673F1225682	n6_tarta	M	070-080	Elderly (71-100)	Curieuse	14.02.2020	Bacteria	Bacteroidota	Bacteroidia	Bacteroidales	UBA932			ASV_ASV37	1.25015
1236665F1225674	23C_tarta	M	100 +	Centenarians (101+)	Curieuse	16.02.2020	Bacteria	Bacteroidota	Bacteroidia	Bacteroidales	UBA932	Bact-08	Bact-08	ASV_ASV22	1.24822
1236674F1225683	n8_tarta	Not determined	004-005	Juveniles (2-25)	Curieuse (Nursery)	14.02.2020	Bacteria	Bacteroidota	Bacteroidia	Bacteroidales				ASV_ASV46	1.24819
1236709F1225718	BULBO_tarta	M	100 +	Centenarians (101+)	Parco Natura Viva	21.06.2021	Bacteria	Bacillota_A	Clostridia	Lachnospirales	Lachnospiraceae			ASV_ASV28	1.24819
1236664F1225673	12GH_tarta (=20C)	F	040-050	Adults (26-70)	Curieuse	15.02.2020								ASV_ASV52	1.24013
1236660F1225669	30C_tarta	M	090-100	Elderly (71-100)	Curieuse	17.02.2020	Bacteria	Bacteroidota	Bacteroidia	Bacteroidales				ASV_ASV13	1.23836
1236693F1225702	8_tarta	F	100 +	Centenarians (101+)	Parco Natura Viva	21.06.2021	Bacteria	Bacillota_A	Clostridia	Lachnospirales	Lachnospiraceae			ASV_ASV28	1.23821
1236669F1225678	17C_tarta	M	060-070	Adults (26-70)	Curieuse	15.02.2020	Bacteria	Bacillota_A	Clostridia	Oscillospirales	Ruminococcaceae	HUN007	HUN007	ASV_ASV16	1.23794
1236671F1225680	ROGER_tarta	M	100 +	Centenarians (101+)	Parco Natura Viva	21.06.2021	Bacteria	Bacillota	Bacilli	Bacillales	DSM-1321	Bacillus_AD	Bacillus_AD	ASV_ASV35	1.2377
1236669F1225678	17C_tarta	M	060-070	Adults (26-70)	Curieuse	15.02.2020	Bacteria	Bacteroidota	Bacteroidia	Bacteroidales				ASV_ASV13	1.23524
1236660F1225669	30C_tarta	M	090-100	Elderly (71-100)	Curieuse	17.02.2020	Bacteria	Bacillota	Bacilli	Bacillales	DSM-1321	Bacillus_AD	Bacillus_AD	ASV_ASV71	1.23371
1236698F1225707	22C_tarta	M	090-100	Elderly (71-100)	Curieuse	16.02.2020	Bacteria	Bacillota_A	Clostridia	Clostridiales	Clostridiaceae	Clostridium	Clostridium	ASV_ASV9	1.22669
1236696F1225705	20C_tarta	F	040-050	Adults (26-70)	Curieuse	16.02.2020	Bacteria	Bacteroidota	Bacteroidia	Bacteroidales				ASV_ASV4	1.22588
1236699F1225708	31C_tarta	Not determined	004-005	Juveniles (2-25)	Curieuse (Nursery)	17.02.2020	Bacteria	Bacillota_A	Clostridia	Lachnospirales	Lachnospiraceae			ASV_ASV120	1.22549
1236683F1225692	26_tarta	Not determined	001-002	Juveniles (2-25)	Curieuse (Nursery)	2022	Bacteria	Bacteroidota	Bacteroidia	Bacteroidales				ASV_ASV12	1.22476
1236686F1225695	17F_tarta	M	080-090	Elderly (71-100)	Botanical Garden	2022	Bacteria	Bacillota_A	Clostridia	Christensenellales	CAG-314	JAEWZT01	JAEWZT01	ASV_ASV606	1.22074
1236672F1225681	10BG_tarta	M	040-050	Adults (26-70)	Botanical Garden	19.02.2020	Bacteria	Bacillota_A	Clostridia	Peptostreptococcales	Anaerovoracaceae			ASV_ASV70	1.21948
1236682F1225691	25F_tarta	Not determined	005 -	Juveniles (2-25)	Curieuse (Nursery)	2022	Bacteria	Bacteroidota	Bacteroidia	Bacteroidales	Bacteroidaceae	Bacteroides_H	Bacteroides_H	ASV_ASV30	1.21922
1236673F1225682	n6_tarta	M	070-080	Elderly (71-100)	Curieuse	14.02.2020	Bacteria	Bacillota_A	Clostridia	Oscillospirales	Acutalibacteraceae			ASV_ASV159	1.21779
1236702F1225711	3BG_tarta	F	030-040	Adults (26-70)	Botanical Garden	19.02.2020	Bacteria	Bacillota_A	Clostridia	Peptostreptococcales	Peptostreptococcaceae	Terrisporobacter	Terrisporobacter	ASV_ASV10	1.21357
1236691F1225700	31F_tarta	Not determined	004-005	Juveniles (2-25)	Private Garden	2022	Bacteria	Bacillota_A	Clostridia	Clostridiales	Clostridiaceae	Clostridium	Clostridium	ASV_ASV32	1.21353
1236705F1225714	6BG_tarta	M	040-050	Adults (26-70)	Botanical Garden	19.02.2020	Bacteria	Bacteroidota	Bacteroidia	Bacteroidales	WCHB1-69	UBA5429	UBA5429	ASV_ASV21	1.21179
1236696F1225705	20C_tarta	F	040-050	Adults (26-70)	Curieuse	16.02.2020	Bacteria	Bacteroidota	Bacteroidia	Bacteroidales	UBA932	Bact-08	Bact-08	ASV_ASV22	1.20943
1236667F1225676	29C_tarta	M	100 +	Centenarians (101+)	Curieuse	17.02.2020	Bacteria	Bacillota_A	Clostridia	Peptostreptococcales	Peptostreptococcaceae	Terrisporobacter	Terrisporobacter	ASV_ASV10	1.2042
1236677F1225686	1N_tarta	Not determined	001-002	Juveniles (2-25)	Curieuse (Nursery)	17.02.2020	Bacteria							ASV_ASV24	1.20333
1236690F1225699	30F_tarta	Not determined	004-005	Juveniles (2-25)	Private Garden	2022	Bacteria	Bacillota_A	Clostridia	Clostridiales	Clostridiaceae	Clostridium	Clostridium	ASV_ASV42	1.20273
1236690F1225699	30F_tarta	Not determined	004-005	Juveniles (2-25)	Private Garden	2022	Bacteria	Bacillota_A	Clostridia	Clostridiales	Clostridiaceae	Clostridium	Clostridium	ASV_ASV74	1.20273
1236670F1225679	4Na_tarta	Not determined	002-003	Juveniles (2-25)	Curieuse (Nursery)	17.02.2020	Bacteria	Bacillota	Bacilli	Bacillales	DSM-1321	Bacillus_AD	Bacillus_AD	ASV_ASV312	1.19986
1236705F1225714	6BG_tarta	M	040-050	Adults (26-70)	Botanical Garden	19.02.2020	Bacteria	Bacteroidota	Bacteroidia	Bacteroidales	WCHB1-69	UBA5429	UBA5429	ASV_ASV18	1.19825
1236682F1225691	25F_tarta	Not determined	005 -	Juveniles (2-25)	Curieuse (Nursery)	2022	RS_GCF_001729965.1~NZ_JRWK01000030.1 Archaea	Methanobacteriota	Methanobacteria	Methanobacteriales	Methanobacteriaceae	Methanosphaera	Methanosphaera sp001729965 [location=1..1480] [ssu_len=1480] [contig_len=1498]	ASV_ASV41	1.19792
1236704F1225713	5BG_tarta	M	080-090	Elderly (71-100)	Botanical Garden	19.02.2020	Bacteria	Bacteroidota	Bacteroidia	Bacteroidales	UBA932	Bact-08	Bact-08	ASV_ASV5	1.19782
1236682F1225691	25F_tarta	Not determined	005 -	Juveniles (2-25)	Curieuse (Nursery)	2022	Bacteria							ASV_ASV24	1.19555
1236697F1225706	21C_tarta	M	080-090	Elderly (71-100)	Curieuse	16.02.2020	Bacteria	Bacteroidota	Bacteroidia	Bacteroidales	WCHB1-69	UBA5429	UBA5429	ASV_ASV23	1.1908
1236684F1225693	27_tarta	Not determined	001-002	Juveniles (2-25)	Curieuse (Nursery)	2022	Bacteria	Bacillota_A	Clostridia	Peptostreptococcales	Peptostreptococcaceae	Terrisporobacter	Terrisporobacter	ASV_ASV10	1.1897
1236680F1225689	4N_tarta	Not determined	2	Juveniles (2-25)	Curieuse (Nursery)	17.02.2020	Bacteria	Bacillota_A	Clostridia	Lachnospirales	Lachnospiraceae			ASV_ASV25	1.18877
1236666F1225675	27C_tarta	M	080-090	Elderly (71-100)	Curieuse	16.02.2020	Bacteria	Fibrobacterota	Chitinivibrionia	Chitinivibrionales	Chitinispirillaceae	JAAYPC01	JAAYPC01	ASV_ASV39	1.18759
1236674F1225683	n8_tarta	Not determined	004-005	Juveniles (2-25)	Curieuse (Nursery)	14.02.2020	Bacteria							ASV_ASV226	1.1862
1236688F1225697	19F_tarta	F	005-006	Juveniles (2-25)	Botanical Garden	2022	Bacteria	Bacillota_A	Clostridia	Clostridiales	Clostridiaceae	Clostridium	Clostridium	ASV_ASV113	1.18516
1236702F1225711	3BG_tarta	F	030-040	Adults (26-70)	Botanical Garden	19.02.2020	Bacteria	Bacillota_A	Clostridia	Peptostreptococcales	Anaerovoracaceae			ASV_ASV70	1.18191
1236662F1225671	n2_tarta	M	070-080	Elderly (71-100)	Curieuse	14.02.2020	Bacteria	Bacillota_A	Clostridia	Oscillospirales	Oscillospiraceae	UBA1774	UBA1774	ASV_ASV62	1.1811
1236704F1225713	5BG_tarta	M	080-090	Elderly (71-100)	Botanical Garden	19.02.2020	Bacteria	Bacillota_A	Clostridia	Lachnospirales	Lachnospiraceae			ASV_ASV17	1.18095
1236677F1225686	1N_tarta	Not determined	001-002	Juveniles (2-25)	Curieuse (Nursery)	17.02.2020	Bacteria	Bacteroidota	Bacteroidia	Bacteroidales	UBA932			ASV_ASV37	1.18084
1236695F1225704	11_tarta	F	015 -	Juveniles (2-25)	Parco Natura Viva	21.06.2021	Bacteria	Bacteroidota	Bacteroidia	Bacteroidales				ASV_ASV4	1.18033
1236676F1225685	n10_tarta	M	090-100	Elderly (71-100)	Curieuse	15.02.2020	Bacteria	Bacteroidota	Bacteroidia	Bacteroidales				ASV_ASV13	1.17492
1236695F1225704	11_tarta	F	015 -	Juveniles (2-25)	Parco Natura Viva	21.06.2021	Bacteria	Bacillota_A	Clostridia	Clostridiales	Clostridiaceae	Clostridium	Clostridium	ASV_ASV113	1.16855
1236696F1225705	20C_tarta	F	040-050	Adults (26-70)	Curieuse	16.02.2020	Bacteria	Bacillota_A	Clostridia	Clostridiales	Clostridiaceae	Clostridium_AA	Clostridium_AA	ASV_ASV61	1.16418
1236704F1225713	5BG_tarta	M	080-090	Elderly (71-100)	Botanical Garden	19.02.2020	Bacteria	Bacteroidota	Bacteroidia	Bacteroidales	Prolixibacteraceae			ASV_ASV525	1.16408
1236690F1225699	30F_tarta	Not determined	004-005	Juveniles (2-25)	Private Garden	2022	Bacteria	Bacillota	Bacilli	Bacillales	DSM-1321	Bacillus_AD	Bacillus_AD	ASV_ASV290	1.16264
1236668F1225677	22F_tarta	M	080-090	Elderly (71-100)	Curieuse	2022	Bacteria	Bacteroidota	Bacteroidia	Bacteroidales	UBA932			ASV_ASV37	1.16078
1236659F1225668	28C_tarta	M	080-090	Elderly (71-100)	Curieuse	16.02.2020	Bacteria	Bacteroidota	Bacteroidia	Bacteroidales	UBA932	Bact-08	Bact-08	ASV_ASV22	1.16057
1236684F1225693	27_tarta	Not determined	001-002	Juveniles (2-25)	Curieuse (Nursery)	2022	Bacteria	Bacteroidota	Bacteroidia	Bacteroidales	UBA932			ASV_ASV56	1.15971
1236688F1225697	19F_tarta	F	005-006	Juveniles (2-25)	Botanical Garden	2022	Bacteria	Bacillota_A	Clostridia	Lachnospirales	Lachnospiraceae	Lachnospira	Lachnospira	ASV_ASV241	1.15931
1236663F1225672	19N_tarta	Not determined	004-005	Juveniles (2-25)	Curieuse (Nursery)	15.02.2020	Bacteria							ASV_ASV226	1.15837
1236683F1225692	26_tarta	Not determined	001-002	Juveniles (2-25)	Curieuse (Nursery)	2022	Bacteria	Bacillota	Bacilli	Bacillales	DSM-1321	Bacillus_AD	Bacillus_AD	ASV_ASV29	1.15796
1236706F1225715	7BG_tarta	F	050-060	Adults (26-70)	Botanical Garden	19.02.2020	Bacteria	Bacillota_A	Clostridia	Peptostreptococcales	Anaerovoracaceae			ASV_ASV70	1.15677
1236672F1225681	10BG_tarta	M	040-050	Adults (26-70)	Botanical Garden	19.02.2020	Bacteria	Bacillota_A	Clostridia	Clostridiales	Clostridiaceae	Clostridium	Clostridium	ASV_ASV222	1.15575
1236687F1225696	18F_tarta	F	040-050	Adults (26-70)	Botanical Garden	2022	Bacteria	Spirochaetota	Spirochaetia	Treponematales	Treponemataceae	Treponema_C	Treponema_C	ASV_ASV15	1.15445
1236668F1225677	22F_tarta	M	080-090	Elderly (71-100)	Curieuse	2022	Bacteria	Bacteroidota	Bacteroidia	Bacteroidales	UBA932			ASV_ASV89	1.15279
1236688F1225697	19F_tarta	F	005-006	Juveniles (2-25)	Botanical Garden	2022	Bacteria	Bacillota_A	Clostridia	Clostridiales	Clostridiaceae	Inconstantimicrobium	Inconstantimicrobium	ASV_ASV184	1.15193
1236706F1225715	7BG_tarta	F	050-060	Adults (26-70)	Botanical Garden	19.02.2020	Bacteria	Bacillota_A	Clostridia	Lachnospirales	Lachnospiraceae	Velocimicrobium	Velocimicrobium	ASV_ASV40	1.15174
1236662F1225671	n2_tarta	M	070-080	Elderly (71-100)	Curieuse	14.02.2020	Bacteria	Bacteroidota	Bacteroidia	Bacteroidales	UBA932			ASV_ASV65	1.15147
1236696F1225705	20C_tarta	F	040-050	Adults (26-70)	Curieuse	16.02.2020	Bacteria	Bacillota_A	Clostridia	Peptostreptococcales	Peptostreptococcaceae			ASV_ASV727	1.14772
1236704F1225713	5BG_tarta	M	080-090	Elderly (71-100)	Botanical Garden	19.02.2020	Bacteria	Bacillota_A	Clostridia	Lachnospirales				ASV_ASV19	1.1448
1236662F1225671	n2_tarta	M	070-080	Elderly (71-100)	Curieuse	14.02.2020	Bacteria	Bacillota_A	Clostridia	TANB77	CAG-465	CAG-465	CAG-465	ASV_ASV483	1.143
1236699F1225708	31C_tarta	Not determined	004-005	Juveniles (2-25)	Curieuse (Nursery)	17.02.2020	Bacteria	Pseudomonadota	Gammaproteobacteria	Enterobacterales_A	Succinivibrionaceae	Ruminobacter	Ruminobacter	ASV_ASV203	1.14277
1236704F1225713	5BG_tarta	M	080-090	Elderly (71-100)	Botanical Garden	19.02.2020	Bacteria	Bacteroidota	Bacteroidia	Bacteroidales	UBA932	Coprenecus	Coprenecus	ASV_ASV3	1.14239
1236666F1225675	27C_tarta	M	080-090	Elderly (71-100)	Curieuse	16.02.2020	Bacteria	Bacillota_A	Clostridia	Oscillospirales	Ruminococcaceae	Anaerofilum	Anaerofilum	ASV_ASV109	1.14102
1236676F1225685	n10_tarta	M	090-100	Elderly (71-100)	Curieuse	15.02.2020	Bacteria	Bacillota_A	Clostridia	Peptostreptococcales	Peptostreptococcaceae			ASV_ASV58	1.13722
1236672F1225681	10BG_tarta	M	040-050	Adults (26-70)	Botanical Garden	19.02.2020	Bacteria	Bacteroidota	Bacteroidia	Bacteroidales	WCHB1-69	UBA5429	UBA5429	ASV_ASV21	1.13547
1236685F1225694	16F_tarta	M	080-090	Elderly (71-100)	Botanical Garden	2022	Bacteria	Bacillota_A	Clostridia	TANB77	CAG-508	Scatovivens	Scatovivens	ASV_ASV139	1.13211
1236696F1225705	20C_tarta	F	040-050	Adults (26-70)	Curieuse	16.02.2020	Bacteria	Bacillota_A	Clostridia	Clostridiales	Clostridiaceae	Clostridium_AA	Clostridium_AA	ASV_ASV99	1.13127
1236704F1225713	5BG_tarta	M	080-090	Elderly (71-100)	Botanical Garden	19.02.2020	Bacteria	Fibrobacterota	Fibrobacteria	Fibrobacterales	Fibrobacteraceae	CAIRAY01	CAIRAY01	ASV_ASV142	1.13034
1236671F1225680	ROGER_tarta	M	100 +	Centenarians (101+)	Parco Natura Viva	21.06.2021	Bacteria	Bacillota_A	Clostridia	Lachnospirales	Cellulosilyticaceae	Cellulosilyticum	Cellulosilyticum	ASV_ASV76	1.12907
1236670F1225679	4Na_tarta	Not determined	002-003	Juveniles (2-25)	Curieuse (Nursery)	17.02.2020	Bacteria	Bacillota_A	Clostridia	Lachnospirales	Lachnospiraceae			ASV_ASV2	1.12822
1236665F1225674	23C_tarta	M	100 +	Centenarians (101+)	Curieuse	16.02.2020	Bacteria	Spirochaetota	Spirochaetia					ASV_ASV59	1.12653
1236701F1225710	2BG_tarta	F	040-050	Adults (26-70)	Botanical Garden	19.02.2020	Bacteria	Bacillota_A	Clostridia	Clostridiales	Clostridiaceae	Clostridium	Clostridium	ASV_ASV8	1.12605
1236661F1225670	9BG_tarta	M	090-100	Elderly (71-100)	Botanical Garden	18.02.2020	Bacteria	Bacteroidota	Bacteroidia	Bacteroidales				ASV_ASV130	1.12191
1236702F1225711	3BG_tarta	F	030-040	Adults (26-70)	Botanical Garden	19.02.2020	Bacteria	Bacteroidota	Bacteroidia	Bacteroidales	WCHB1-69	UBA5429	UBA5429	ASV_ASV18	1.1207
1236679F1225688	3N_tarta	Not determined	002-003	Juveniles (2-25)	Curieuse (Nursery)	17.02.2020	Bacteria	Bacillota_A	Clostridia	Christensenellales	UBA1242	UBA7584	UBA7584	ASV_ASV311	1.1183
1236702F1225711	3BG_tarta	F	030-040	Adults (26-70)	Botanical Garden	19.02.2020	Bacteria	Bacteroidota	Bacteroidia	Bacteroidales	WCHB1-69	UBA5429	UBA5429	ASV_ASV21	1.11648
1236670F1225679	4Na_tarta	Not determined	002-003	Juveniles (2-25)	Curieuse (Nursery)	17.02.2020	Bacteria	Pseudomonadota	Gammaproteobacteria	Pseudomonadales	Moraxellaceae	Acinetobacter	Acinetobacter	ASV_ASV418	1.11479
1236662F1225671	n2_tarta	M	070-080	Elderly (71-100)	Curieuse	14.02.2020	Bacteria	Spirochaetota	Spirochaetia	Treponematales	Treponemataceae			ASV_ASV166	1.11337
1236695F1225704	11_tarta	F	015 -	Juveniles (2-25)	Parco Natura Viva	21.06.2021	Bacteria	Bacteroidota	Bacteroidia	Bacteroidales	WCHB1-69	UBA5429	UBA5429	ASV_ASV125	1.11159
1236664F1225673	12GH_tarta (=20C)	F	040-050	Adults (26-70)	Curieuse	15.02.2020	Bacteria	Bacillota_A	Clostridia	Clostridiales	Clostridiaceae	Clostridium	Clostridium	ASV_ASV20	1.1108
1236690F1225699	30F_tarta	Not determined	004-005	Juveniles (2-25)	Private Garden	2022	Bacteria	Bacteroidota	Bacteroidia	Bacteroidales	UBA932	Bact-08	Bact-08	ASV_ASV5	1.10918
1236691F1225700	31F_tarta	Not determined	004-005	Juveniles (2-25)	Private Garden	2022	Bacteria	Bacillota_A	Clostridia	Clostridiales	Clostridiaceae	Clostridium	Clostridium	ASV_ASV74	1.10689
1236681F1225690	24F_tarta	M	030-040	Adults (26-70)	Curieuse	2022	Bacteria	Bacillota_A	Clostridia	Clostridiales	Clostridiaceae	Clostridium	Clostridium	ASV_ASV9	1.10575
1236695F1225704	11_tarta	F	015 -	Juveniles (2-25)	Parco Natura Viva	21.06.2021	Bacteria	Bacteroidota	Bacteroidia	Bacteroidales	UBA932	Bact-08	Bact-08	ASV_ASV5	1.1057
1236658F1225667	24C_tarta	F	030-040	Adults (26-70)	Curieuse	16.02.2020	Bacteria	Bacteroidota	Bacteroidia	Bacteroidales	UBA932	Bact-08	Bact-08	ASV_ASV22	1.10141
1236674F1225683	n8_tarta	Not determined	004-005	Juveniles (2-25)	Curieuse (Nursery)	14.02.2020	Bacteria	Bacillota_A	Clostridia	Lachnospirales	Lachnospiraceae			ASV_ASV17	1.0994
1236678F1225687	2N_tarta	Not determined	002-003	Juveniles (2-25)	Curieuse (Nursery)	17.02.2020	Bacteria	Bacillota_A	Clostridia	Peptostreptococcales	Peptostreptococcaceae			ASV_ASV58	1.09934
1236672F1225681	10BG_tarta	M	040-050	Adults (26-70)	Botanical Garden	19.02.2020	RS_GCF_001729965.1~NZ_JRWK01000030.1 Archaea	Methanobacteriota	Methanobacteria	Methanobacteriales	Methanobacteriaceae	Methanosphaera	Methanosphaera sp001729965 [location=1..1480] [ssu_len=1480] [contig_len=1498]	ASV_ASV41	1.09782
1236688F1225697	19F_tarta	F	005-006	Juveniles (2-25)	Botanical Garden	2022	Bacteria	Bacillota_A	Clostridia	Clostridiales	Clostridiaceae	Clostridium	Clostridium	ASV_ASV103	1.09655
1236688F1225697	19F_tarta	F	005-006	Juveniles (2-25)	Botanical Garden	2022	Bacteria	Nitrospinota	UBA7883	UBA7883	JADGCD01	JADGCD01	JADGCD01	ASV_ASV698	1.09655
1236674F1225683	n8_tarta	Not determined	004-005	Juveniles (2-25)	Curieuse (Nursery)	14.02.2020	Bacteria	Bacillota_A	Clostridia	Lachnospirales	Lachnospiraceae			ASV_ASV48	1.09527
1236663F1225672	19N_tarta	Not determined	004-005	Juveniles (2-25)	Curieuse (Nursery)	15.02.2020	Bacteria	Bacteroidota	Bacteroidia	Bacteroidales	Bacteroidaceae			ASV_ASV60	1.09416
1236660F1225669	30C_tarta	M	090-100	Elderly (71-100)	Curieuse	17.02.2020	Bacteria	Bacillota_A	Clostridia	Clostridiales	Clostridiaceae	Clostridium	Clostridium	ASV_ASV20	1.09404
1236676F1225685	n10_tarta	M	090-100	Elderly (71-100)	Curieuse	15.02.2020	Bacteria							ASV_ASV73	1.09324
1236680F1225689	4N_tarta	Not determined	2	Juveniles (2-25)	Curieuse (Nursery)	17.02.2020	Bacteria	Pseudomonadota	Gammaproteobacteria	Pseudomonadales	Pseudomonadaceae	Pseudomonas_H	Pseudomonas_H	ASV_ASV305	1.09319
1236671F1225680	ROGER_tarta	M	100 +	Centenarians (101+)	Parco Natura Viva	21.06.2021	Bacteria	Bacillota_A	Clostridia	Lachnospirales	Cellulosilyticaceae	Cellulosilyticum	Cellulosilyticum	ASV_ASV75	1.09286
1236689F1225698	29F_tarta	Not determined	004-005	Juveniles (2-25)	Private Garden	2022	Bacteria	Bacillota_A	Clostridia	Clostridiales	Clostridiaceae	Clostridium	Clostridium	ASV_ASV111	1.08726
1236676F1225685	n10_tarta	M	090-100	Elderly (71-100)	Curieuse	15.02.2020	Bacteria	Bacillota_A	Clostridia	Oscillospirales	Oscillospiraceae	UBA1774	UBA1774	ASV_ASV62	1.08696
1236669F1225678	17C_tarta	M	060-070	Adults (26-70)	Curieuse	15.02.2020	Bacteria	Bacteroidota	Bacteroidia	Bacteroidales	WCHB1-69	UBA5429	UBA5429	ASV_ASV23	1.08387
1236658F1225667	24C_tarta	F	030-040	Adults (26-70)	Curieuse	16.02.2020	Bacteria	Bacillota_A	Clostridia	Lachnospirales	Lachnospiraceae			ASV_ASV153	1.0835
1236681F1225690	24F_tarta	M	030-040	Adults (26-70)	Curieuse	2022	Bacteria	Bacteroidota	Bacteroidia	Bacteroidales				ASV_ASV13	1.08323
1236703F1225712	4BG_tarta	M	030-040	Adults (26-70)	Botanical Garden	19.02.2020	Bacteria	Bacillota_A	Clostridia	Oscillospirales	Oscillospiraceae	UBA1774	UBA1774	ASV_ASV62	1.08285
1236701F1225710	2BG_tarta	F	040-050	Adults (26-70)	Botanical Garden	19.02.2020	Bacteria	Bacteroidota	Bacteroidia	Bacteroidales	WCHB1-69	UBA5429	UBA5429	ASV_ASV18	1.08113
1236668F1225677	22F_tarta	M	080-090	Elderly (71-100)	Curieuse	2022	Bacteria	Spirochaetota	Spirochaetia					ASV_ASV59	1.08091
1236685F1225694	16F_tarta	M	080-090	Elderly (71-100)	Botanical Garden	2022	Bacteria	Bacteroidota	Bacteroidia	Bacteroidales				ASV_ASV12	1.08039
1236682F1225691	25F_tarta	Not determined	005 -	Juveniles (2-25)	Curieuse (Nursery)	2022	Bacteria	Bacillota	Bacilli	Bacillales	DSM-1321	Bacillus_AD	Bacillus_AD	ASV_ASV71	1.07955
1236683F1225692	26_tarta	Not determined	001-002	Juveniles (2-25)	Curieuse (Nursery)	2022	Bacteria	Bacteroidota	Bacteroidia	Bacteroidales	UBA932			ASV_ASV89	1.07878
1236658F1225667	24C_tarta	F	030-040	Adults (26-70)	Curieuse	16.02.2020								ASV_ASV126	1.07455
1236665F1225674	23C_tarta	M	100 +	Centenarians (101+)	Curieuse	16.02.2020	Bacteria	Bacteroidota	Bacteroidia	Bacteroidales				ASV_ASV77	1.07437
1236693F1225702	8_tarta	F	100 +	Centenarians (101+)	Parco Natura Viva	21.06.2021	Bacteria	Bacillota_A	Clostridia	Clostridiales	Clostridiaceae	Clostridium	Clostridium	ASV_ASV137	1.0716
1236683F1225692	26_tarta	Not determined	001-002	Juveniles (2-25)	Curieuse (Nursery)	2022	Bacteria	Bacillota_A	Clostridia	Lachnospirales	Lachnospiraceae			ASV_ASV110	1.06888
1236661F1225670	9BG_tarta	M	090-100	Elderly (71-100)	Botanical Garden	18.02.2020	Bacteria	Bacteroidota	Bacteroidia	Bacteroidales	WCHB1-69	UBA5429	UBA5429	ASV_ASV132	1.06735
1236675F1225684	n9_tarta	M	070-080	Elderly (71-100)	Curieuse	15.02.2020	Bacteria	Bacteroidota	Bacteroidia	Bacteroidales	UBA932	Bact-08	Bact-08	ASV_ASV169	1.06711
1236692F1225701	7_tarta	F	015 -	Juveniles (2-25)	Parco Natura Viva	21.06.2021	Bacteria	Bacillota_A	Clostridia	Clostridiales	Clostridiaceae	Clostridium	Clostridium	ASV_ASV111	1.06679
1236684F1225693	27_tarta	Not determined	001-002	Juveniles (2-25)	Curieuse (Nursery)	2022	Bacteria	Bacillota_A	Clostridia	Lachnospirales	Lachnospiraceae	Velocimicrobium	Velocimicrobium	ASV_ASV167	1.06473
1236680F1225689	4N_tarta	Not determined	2	Juveniles (2-25)	Curieuse (Nursery)	17.02.2020	Bacteria	Bacillota	Bacilli	Staphylococcales	Staphylococcaceae	Staphylococcus	Staphylococcus	ASV_ASV381	1.06332
1236686F1225695	17F_tarta	M	080-090	Elderly (71-100)	Botanical Garden	2022	Bacteria	Fibrobacterota	Chitinivibrionia	Chitinivibrionales	Chitinispirillaceae	JAAYPC01	JAAYPC01	ASV_ASV39	1.06268
1236685F1225694	16F_tarta	M	080-090	Elderly (71-100)	Botanical Garden	2022	Bacteria	Bacillota_A	Clostridia	Clostridiales	Clostridiaceae	Clostridium	Clostridium	ASV_ASV92	1.06265
1236674F1225683	n8_tarta	Not determined	004-005	Juveniles (2-25)	Curieuse (Nursery)	14.02.2020	Bacteria	Bacillota_A	Clostridia	Clostridiales	Clostridiaceae	Clostridium	Clostridium	ASV_ASV81	1.0622
1236687F1225696	18F_tarta	F	040-050	Adults (26-70)	Botanical Garden	2022	Bacteria	Bacteroidota	Kapabacteria	Kapabacteriales				ASV_ASV33	1.06129
1236684F1225693	27_tarta	Not determined	001-002	Juveniles (2-25)	Curieuse (Nursery)	2022	Bacteria	Bacillota_A	Clostridia	Clostridiales	Clostridiaceae	Clostridium	Clostridium	ASV_ASV20	1.05974
1236704F1225713	5BG_tarta	M	080-090	Elderly (71-100)	Botanical Garden	19.02.2020	Bacteria	Bacillota_A	Clostridia	Lachnospirales	Lachnospiraceae	Velocimicrobium	Velocimicrobium	ASV_ASV40	1.05804
1236690F1225699	30F_tarta	Not determined	004-005	Juveniles (2-25)	Private Garden	2022	Bacteria	Bacillota_A	Clostridia	Clostridiales	Clostridiaceae	Clostridium	Clostridium	ASV_ASV32	1.05573
1236676F1225685	n10_tarta	M	090-100	Elderly (71-100)	Curieuse	15.02.2020	Bacteria	Bacteroidota	Bacteroidia	Bacteroidales	UBA932	Bact-08	Bact-08	ASV_ASV5	1.05554
1236701F1225710	2BG_tarta	F	040-050	Adults (26-70)	Botanical Garden	19.02.2020	Bacteria	Bacteroidota	Bacteroidia	Bacteroidales	WCHB1-69	UBA5429	UBA5429	ASV_ASV21	1.05418
1236663F1225672	19N_tarta	Not determined	004-005	Juveniles (2-25)	Curieuse (Nursery)	15.02.2020	Bacteria	Bacillota_A	Clostridia	Lachnospirales	Lachnospiraceae			ASV_ASV17	1.05306
1236709F1225718	BULBO_tarta	M	100 +	Centenarians (101+)	Parco Natura Viva	21.06.2021	Bacteria	Bacillota_A	Clostridia	Clostridiales	Clostridiaceae	Clostridium	Clostridium	ASV_ASV137	1.0508
1236685F1225694	16F_tarta	M	080-090	Elderly (71-100)	Botanical Garden	2022	Bacteria	Bacillota_A	Clostridia	Oscillospirales	Ruminococcaceae	Ruminococcus_D	Ruminococcus_D	ASV_ASV146	1.04935
1236682F1225691	25F_tarta	Not determined	005 -	Juveniles (2-25)	Curieuse (Nursery)	2022	Bacteria	Bacillota	Bacilli	Bacillales	DSM-1321	Bacillus_AD	Bacillus_AD	ASV_ASV35	1.04877
1236658F1225667	24C_tarta	F	030-040	Adults (26-70)	Curieuse	16.02.2020	Bacteria	Bacillota_A	Clostridia	Oscillospirales	Acutalibacteraceae			ASV_ASV136	1.04768
1236686F1225695	17F_tarta	M	080-090	Elderly (71-100)	Botanical Garden	2022	Bacteria	Bacteroidota	Bacteroidia	Bacteroidales				ASV_ASV722	1.04587
1236679F1225688	3N_tarta	Not determined	002-003	Juveniles (2-25)	Curieuse (Nursery)	17.02.2020	Bacteria	Bacillota_A	Clostridia	Peptostreptococcales	Filifactoraceae	Proteocatella	Proteocatella	ASV_ASV296	1.04554
1236696F1225705	20C_tarta	F	040-050	Adults (26-70)	Curieuse	16.02.2020	Bacteria	Bacillota_A	Clostridia	Clostridiales	Clostridiaceae	Clostridium	Clostridium	ASV_ASV20	1.04488
1236702F1225711	3BG_tarta	F	030-040	Adults (26-70)	Botanical Garden	19.02.2020	Bacteria	Bacteroidota	Bacteroidia	Bacteroidales	UBA932			ASV_ASV271	1.04472
1236686F1225695	17F_tarta	M	080-090	Elderly (71-100)	Botanical Garden	2022	Bacteria	Bacillota_A	Clostridia	Clostridiales	Clostridiaceae	Clostridium	Clostridium	ASV_ASV92	1.04251
1236669F1225678	17C_tarta	M	060-070	Adults (26-70)	Curieuse	15.02.2020	Bacteria	Bacteroidota	Kapabacteria	Kapabacteriales				ASV_ASV33	1.04062
1236672F1225681	10BG_tarta	M	040-050	Adults (26-70)	Botanical Garden	19.02.2020	Bacteria	Bacteroidota	Bacteroidia	Bacteroidales	WCHB1-69	UBA5429	UBA5429	ASV_ASV18	1.03989
1236685F1225694	16F_tarta	M	080-090	Elderly (71-100)	Botanical Garden	2022	Bacteria							ASV_ASV24	1.03753
1236657F1225666	�	F	030-040	Adults (26-70)	Curieuse	14.02.2020	Bacteria	Bacillota_A	Clostridia	Lachnospirales	Lachnospiraceae			ASV_ASV17	1.03447
1236672F1225681	10BG_tarta	M	040-050	Adults (26-70)	Botanical Garden	19.02.2020	Bacteria	Fibrobacterota	Chitinivibrionia	Chitinivibrionales	Chitinispirillaceae	JAAYPC01	JAAYPC01	ASV_ASV39	1.03409
1236660F1225669	30C_tarta	M	090-100	Elderly (71-100)	Curieuse	17.02.2020	Bacteria							ASV_ASV73	1.03352
1236709F1225718	BULBO_tarta	M	100 +	Centenarians (101+)	Parco Natura Viva	21.06.2021	Bacteria	Bacillota_A	Clostridia	Lachnospirales	Lachnospiraceae			ASV_ASV66	1.03338
1236665F1225674	23C_tarta	M	100 +	Centenarians (101+)	Curieuse	16.02.2020	Bacteria	Bacillota_A	Clostridia	Peptostreptococcales	Peptostreptococcaceae	Terrisporobacter	Terrisporobacter	ASV_ASV10	1.03265
1236691F1225700	31F_tarta	Not determined	004-005	Juveniles (2-25)	Private Garden	2022	Bacteria	Bacillota_A	Clostridia	Clostridiales	Clostridiaceae	Clostridium	Clostridium	ASV_ASV68	1.03225
1236670F1225679	4Na_tarta	Not determined	002-003	Juveniles (2-25)	Curieuse (Nursery)	17.02.2020	Bacteria	Pseudomonadota	Gammaproteobacteria	Enterobacterales_A	Alteromonadaceae	Rheinheimera	Rheinheimera	ASV_ASV399	1.03197
1236667F1225676	29C_tarta	M	100 +	Centenarians (101+)	Curieuse	17.02.2020	Bacteria	Bacteroidota	Bacteroidia	Bacteroidales	UBA932	Bact-08	Bact-08	ASV_ASV22	1.03186
1236657F1225666	�	F	030-040	Adults (26-70)	Curieuse	14.02.2020	Bacteria	Bacillota_A	Clostridia	Peptostreptococcales	Peptostreptococcaceae	Terrisporobacter	Terrisporobacter	ASV_ASV10	1.03185
1236676F1225685	n10_tarta	M	090-100	Elderly (71-100)	Curieuse	15.02.2020	Bacteria	Bacteroidota	Bacteroidia	Bacteroidales	WCHB1-69	UBA5429	UBA5429	ASV_ASV23	1.03041
1236685F1225694	16F_tarta	M	080-090	Elderly (71-100)	Botanical Garden	2022	Bacteria	Bacillota_A	Clostridia	Lachnospirales	Lachnospiraceae			ASV_ASV31	1.03014
1236685F1225694	16F_tarta	M	080-090	Elderly (71-100)	Botanical Garden	2022	Bacteria	Bacillota_A	Clostridia	Clostridiales	Clostridiaceae	Inconstantimicrobium	Inconstantimicrobium	ASV_ASV38	1.03014
1236667F1225676	29C_tarta	M	100 +	Centenarians (101+)	Curieuse	17.02.2020	Bacteria	Bacillota_A	Clostridia	Oscillospirales	Ruminococcaceae	HUN007	HUN007	ASV_ASV43	1.02971
1236678F1225687	2N_tarta	Not determined	002-003	Juveniles (2-25)	Curieuse (Nursery)	17.02.2020	Bacteria	Bacillota_A	Clostridia	Peptostreptococcales	Peptostreptococcaceae	Terrisporobacter	Terrisporobacter	ASV_ASV10	1.0297
1236698F1225707	22C_tarta	M	090-100	Elderly (71-100)	Curieuse	16.02.2020	Bacteria	Bacillota_A	Clostridia	Clostridiales	Clostridiaceae	Clostridium	Clostridium	ASV_ASV137	1.02948
1236674F1225683	n8_tarta	Not determined	004-005	Juveniles (2-25)	Curieuse (Nursery)	14.02.2020	Bacteria	Bacillota_A	Clostridia	Lachnospirales	Lachnospiraceae			ASV_ASV14	1.02914
1236690F1225699	30F_tarta	Not determined	004-005	Juveniles (2-25)	Private Garden	2022	Bacteria	Bacillota_A	Clostridia	Clostridiales	Clostridiaceae	Clostridium	Clostridium	ASV_ASV20	1.029
1236697F1225706	21C_tarta	M	080-090	Elderly (71-100)	Curieuse	16.02.2020	Bacteria	Bacillota_A	Clostridia	Oscillospirales	Ruminococcaceae	HUN007	HUN007	ASV_ASV43	1.02856
1236665F1225674	23C_tarta	M	100 +	Centenarians (101+)	Curieuse	16.02.2020	Bacteria	Bacillota_A	Clostridia	Clostridiales	Clostridiaceae	Clostridium	Clostridium	ASV_ASV175	1.02743
1236704F1225713	5BG_tarta	M	080-090	Elderly (71-100)	Botanical Garden	19.02.2020	Bacteria	Bacillota_A	Clostridia	Clostridiales	Clostridiaceae			ASV_ASV11	1.0267
1236693F1225702	8_tarta	F	100 +	Centenarians (101+)	Parco Natura Viva	21.06.2021								ASV_ASV34	1.02617
1236674F1225683	n8_tarta	Not determined	004-005	Juveniles (2-25)	Curieuse (Nursery)	14.02.2020	Bacteria	Bacillota_A	Clostridia	Peptostreptococcales	Peptostreptococcaceae	Terrisporobacter	Terrisporobacter	ASV_ASV10	1.02501
1236683F1225692	26_tarta	Not determined	001-002	Juveniles (2-25)	Curieuse (Nursery)	2022	Bacteria	Bacillota_A	Clostridia	Lachnospirales	Lachnospiraceae			ASV_ASV31	1.02435
1236676F1225685	n10_tarta	M	090-100	Elderly (71-100)	Curieuse	15.02.2020	Bacteria	Bacteroidota	Bacteroidia	Bacteroidales	Bacteroidaceae	Bacteroides_H	Bacteroides_H	ASV_ASV30	1.02413
1236691F1225700	31F_tarta	Not determined	004-005	Juveniles (2-25)	Private Garden	2022	Bacteria	Bacillota_A	Clostridia	Lachnospirales	Cellulosilyticaceae	Cellulosilyticum	Cellulosilyticum	ASV_ASV50	1.02372
1236707F1225716	8BG_tarta	M	100 +	Centenarians (101+)	Botanical Garden	19.02.2020	Bacteria	Bacillota_A	Clostridia	Lachnospirales	Lachnospiraceae			ASV_ASV48	1.023
1236689F1225698	29F_tarta	Not determined	004-005	Juveniles (2-25)	Private Garden	2022	Bacteria	Bacillota_A	Clostridia	Clostridiales	Clostridiaceae	Sarcina	Sarcina	ASV_ASV194	1.02285
1236689F1225698	29F_tarta	Not determined	004-005	Juveniles (2-25)	Private Garden	2022	Bacteria	Bacillota_A	Clostridia	Peptostreptococcales	Peptostreptococcaceae	Romboutsia_D	Romboutsia_D	ASV_ASV507	1.02285
1236689F1225698	29F_tarta	Not determined	004-005	Juveniles (2-25)	Private Garden	2022	Bacteria	Bacillota_A	Clostridia	Clostridiales	Clostridiaceae	Clostridium	Clostridium	ASV_ASV9	1.02285
1236701F1225710	2BG_tarta	F	040-050	Adults (26-70)	Botanical Garden	19.02.2020	Bacteria	Bacteroidota	Bacteroidia	Bacteroidales	UBA932	Bact-08	Bact-08	ASV_ASV5	1.02123
1236684F1225693	27_tarta	Not determined	001-002	Juveniles (2-25)	Curieuse (Nursery)	2022	Bacteria	Bacillota_A	Clostridia	Lachnospirales	Lachnospiraceae			ASV_ASV326	1.01975
1236661F1225670	9BG_tarta	M	090-100	Elderly (71-100)	Botanical Garden	18.02.2020	Bacteria	Bacillota_A	Clostridia	Lachnospirales	Lachnospiraceae			ASV_ASV31	1.01961
1236659F1225668	28C_tarta	M	080-090	Elderly (71-100)	Curieuse	16.02.2020	Bacteria	Bacillota_A	Clostridia	Oscillospirales	Oscillospiraceae	UBA1774	UBA1774	ASV_ASV62	1.01815
1236677F1225686	1N_tarta	Not determined	001-002	Juveniles (2-25)	Curieuse (Nursery)	17.02.2020	Bacteria	Pseudomonadota	Gammaproteobacteria	Pseudomonadales	Moraxellaceae	Acinetobacter	Acinetobacter	ASV_ASV143	1.01777
1236664F1225673	12GH_tarta (=20C)	F	040-050	Adults (26-70)	Curieuse	15.02.2020	Bacteria	Planctomycetota	Planctomycetia	Pirellulales	Lacipirellulaceae			ASV_ASV348	1.01612
1236662F1225671	n2_tarta	M	070-080	Elderly (71-100)	Curieuse	14.02.2020	Bacteria	Bacillota_A	Clostridia	Peptostreptococcales	Peptostreptococcaceae	Terrisporobacter	Terrisporobacter	ASV_ASV10	1.016
1236705F1225714	6BG_tarta	M	040-050	Adults (26-70)	Botanical Garden	19.02.2020								ASV_ASV34	1.01547
1236665F1225674	23C_tarta	M	100 +	Centenarians (101+)	Curieuse	16.02.2020	Bacteria	Bacillota_A	Clostridia	Oscillospirales	Acutalibacteraceae			ASV_ASV136	1.01526
1236660F1225669	30C_tarta	M	090-100	Elderly (71-100)	Curieuse	17.02.2020	Bacteria	Bacillota	Bacilli	Bacillales	DSM-1321	Bacillus_AD	Bacillus_AD	ASV_ASV84	1.0149
1236684F1225693	27_tarta	Not determined	001-002	Juveniles (2-25)	Curieuse (Nursery)	2022	Bacteria	Bacillota_A	Clostridia	Clostridiales	Clostridiaceae	Clostridium	Clostridium	ASV_ASV356	1.01475
1236658F1225667	24C_tarta	F	030-040	Adults (26-70)	Curieuse	16.02.2020	Bacteria	Spirochaetota	Spirochaetia					ASV_ASV59	1.01186
1236670F1225679	4Na_tarta	Not determined	002-003	Juveniles (2-25)	Curieuse (Nursery)	17.02.2020	Bacteria	Bacillota	Bacilli	Bacillales	DSM-1321	Bacillus_AD	Bacillus_AD	ASV_ASV165	1.01182
1236658F1225667	24C_tarta	F	030-040	Adults (26-70)	Curieuse	16.02.2020	Bacteria	Bacillota_A	Clostridia	Clostridiales	Clostridiaceae	Clostridium	Clostridium	ASV_ASV36	1.00739
1236666F1225675	27C_tarta	M	080-090	Elderly (71-100)	Curieuse	16.02.2020	Bacteria	Bacillota	Bacilli					ASV_ASV79	1.00712
1236663F1225672	19N_tarta	Not determined	004-005	Juveniles (2-25)	Curieuse (Nursery)	15.02.2020	Bacteria	Verrucomicrobiota	Verrucomicrobiae	Verrucomicrobiales				ASV_ASV80	1.00683
1236686F1225695	17F_tarta	M	080-090	Elderly (71-100)	Botanical Garden	2022	Bacteria	Bacillota_A	Clostridia	Clostridiales	Caloramatoraceae			ASV_ASV739	1.00552
1236681F1225690	24F_tarta	M	030-040	Adults (26-70)	Curieuse	2022	Bacteria	Bacillota_A	Clostridia	Clostridiales	Clostridiaceae			ASV_ASV101	1.00318
1236708F1225717	15C_tarta	M	080-090	Elderly (71-100)	Curieuse	15.02.2020	Bacteria	Bacillota_A	Clostridia	Clostridiales	Clostridiaceae	Clostridium	Clostridium	ASV_ASV20	1.00302
1236686F1225695	17F_tarta	M	080-090	Elderly (71-100)	Botanical Garden	2022	Bacteria	Bacillota_A	Clostridia	Clostridiales	Clostridiaceae	Clostridium	Clostridium	ASV_ASV245	1.00215
1236666F1225675	27C_tarta	M	080-090	Elderly (71-100)	Curieuse	16.02.2020	Bacteria	Bacteroidota	Bacteroidia	Bacteroidales	WCHB1-69	UBA5429	UBA5429	ASV_ASV21	0.99936
1236686F1225695	17F_tarta	M	080-090	Elderly (71-100)	Botanical Garden	2022	Bacteria	Bacillota_A	Clostridia	Tissierellales	Sedimentibacteraceae	UBA1535	UBA1535	ASV_ASV555	0.998789
1236697F1225706	21C_tarta	M	080-090	Elderly (71-100)	Curieuse	16.02.2020	Bacteria	Bacillota_A	Clostridia	Lachnospirales	Lachnospiraceae			ASV_ASV118	0.997949
1236671F1225680	ROGER_tarta	M	100 +	Centenarians (101+)	Parco Natura Viva	21.06.2021	Bacteria	Bacillota_A	Clostridia	Clostridiales	Clostridiaceae	Clostridium	Clostridium	ASV_ASV103	0.9974
1236671F1225680	ROGER_tarta	M	100 +	Centenarians (101+)	Parco Natura Viva	21.06.2021	Bacteria	Bacillota_A	Clostridia	Clostridiales	Clostridiaceae	Inconstantimicrobium	Inconstantimicrobium	ASV_ASV38	0.9974
1236671F1225680	ROGER_tarta	M	100 +	Centenarians (101+)	Parco Natura Viva	21.06.2021	Bacteria	Bacillota_A	Clostridia	Clostridiales	Clostridiaceae	Clostridium	Clostridium	ASV_ASV74	0.9974
1236669F1225678	17C_tarta	M	060-070	Adults (26-70)	Curieuse	15.02.2020	Bacteria	Bacillota_A	Clostridia	Lachnospirales	Lachnospiraceae			ASV_ASV25	0.997378
1236708F1225717	15C_tarta	M	080-090	Elderly (71-100)	Curieuse	15.02.2020	Bacteria	Bacillota_A	Clostridia	Lachnospirales	Lachnospiraceae			ASV_ASV14	0.995219
1236691F1225700	31F_tarta	Not determined	004-005	Juveniles (2-25)	Private Garden	2022	Bacteria	Bacillota_A	Clostridia	Clostridiales	Clostridiaceae	Sarcina	Sarcina	ASV_ASV223	0.993858
1236690F1225699	30F_tarta	Not determined	004-005	Juveniles (2-25)	Private Garden	2022	Bacteria	Bacteroidota	Bacteroidia	Bacteroidales	Bacteroidaceae			ASV_ASV60	0.988908
1236660F1225669	30C_tarta	M	090-100	Elderly (71-100)	Curieuse	17.02.2020	Bacteria	Bacillota_A	Clostridia	Clostridiales	Clostridiaceae	Clostridium	Clostridium	ASV_ASV36	0.986965
1236663F1225672	19N_tarta	Not determined	004-005	Juveniles (2-25)	Curieuse (Nursery)	15.02.2020	Bacteria	Bacillota_A	Clostridia	Oscillospirales	Ruminococcaceae	Faecalibacterium	Faecalibacterium	ASV_ASV405	0.986284
1236706F1225715	7BG_tarta	F	050-060	Adults (26-70)	Botanical Garden	19.02.2020	Bacteria	Pseudomonadota	Gammaproteobacteria	Burkholderiales				ASV_ASV128	0.985767
1236697F1225706	21C_tarta	M	080-090	Elderly (71-100)	Curieuse	16.02.2020	Bacteria	Bacillota_A	Clostridia	Clostridiales	Clostridiaceae	Clostridium	Clostridium	ASV_ASV44	0.985704
1236670F1225679	4Na_tarta	Not determined	002-003	Juveniles (2-25)	Curieuse (Nursery)	17.02.2020	Bacteria	Bacillota	Bacilli	Bacillales	DSM-1321	Bacillus_AD	Bacillus_AD	ASV_ASV71	0.984957
1236670F1225679	4Na_tarta	Not determined	002-003	Juveniles (2-25)	Curieuse (Nursery)	17.02.2020	Bacteria	Bacillota	Bacilli					ASV_ASV79	0.984957
1236675F1225684	n9_tarta	M	070-080	Elderly (71-100)	Curieuse	15.02.2020	Bacteria	Bacillota	Bacilli	Erysipelotrichales	Erysipelotrichaceae	Breznakia	Breznakia	ASV_ASV174	0.984112
1236670F1225679	4Na_tarta	Not determined	002-003	Juveniles (2-25)	Curieuse (Nursery)	17.02.2020	Bacteria	Bacteroidota	Bacteroidia	Flavobacteriales	Flavobacteriaceae	Flavobacterium	Flavobacterium	ASV_ASV437	0.982718
1236657F1225666	�	F	030-040	Adults (26-70)	Curieuse	14.02.2020	Bacteria	Bacteroidota	Bacteroidia	Bacteroidales	ZOR0009	Acetobacteroides	Acetobacteroides	ASV_ASV90	0.981962
1236703F1225712	4BG_tarta	M	030-040	Adults (26-70)	Botanical Garden	19.02.2020	Bacteria	Bacteroidota	Bacteroidia	Bacteroidales				ASV_ASV77	0.981105
1236691F1225700	31F_tarta	Not determined	004-005	Juveniles (2-25)	Private Garden	2022	Bacteria	Bacillota_A	Clostridia	Peptostreptococcales	Peptostreptococcaceae	Terrisporobacter	Terrisporobacter	ASV_ASV10	0.981061
1236678F1225687	2N_tarta	Not determined	002-003	Juveniles (2-25)	Curieuse (Nursery)	17.02.2020	Bacteria	Bacillota_A	Clostridia	Clostridiales	Clostridiaceae	Clostridium	Clostridium	ASV_ASV44	0.979953
1236675F1225684	n9_tarta	M	070-080	Elderly (71-100)	Curieuse	15.02.2020	Bacteria	Bacteroidota	Bacteroidia	Bacteroidales	Bacteroidaceae	Bacteroides_H	Bacteroides_H	ASV_ASV30	0.978184
1236668F1225677	22F_tarta	M	080-090	Elderly (71-100)	Curieuse	2022	Bacteria	Bacteroidota	Bacteroidia	Bacteroidales	UBA932	Coprenecus	Coprenecus	ASV_ASV3	0.977077
1236672F1225681	10BG_tarta	M	040-050	Adults (26-70)	Botanical Garden	19.02.2020	Bacteria	Bacteroidota	Bacteroidia	Bacteroidales				ASV_ASV46	0.976161
1236705F1225714	6BG_tarta	M	040-050	Adults (26-70)	Botanical Garden	19.02.2020	Bacteria	Bacteroidota	Bacteroidia	Bacteroidales				ASV_ASV12	0.97485
1236662F1225671	n2_tarta	M	070-080	Elderly (71-100)	Curieuse	14.02.2020	Bacteria	Bacteroidota	Bacteroidia	Bacteroidales	Bacteroidaceae			ASV_ASV224	0.973669
1236685F1225694	16F_tarta	M	080-090	Elderly (71-100)	Botanical Garden	2022	Bacteria	Bacteroidota	Bacteroidia	Bacteroidales	UBA932			ASV_ASV56	0.972495
1236661F1225670	9BG_tarta	M	090-100	Elderly (71-100)	Botanical Garden	18.02.2020	Bacteria	Bacteroidota	Bacteroidia	Bacteroidales	WCHB1-69	UBA5429	UBA5429	ASV_ASV23	0.971867
1236668F1225677	22F_tarta	M	080-090	Elderly (71-100)	Curieuse	2022	Bacteria	Bacteroidota	Bacteroidia	Bacteroidales	WCHB1-69	UBA5429	UBA5429	ASV_ASV125	0.971753
1236689F1225698	29F_tarta	Not determined	004-005	Juveniles (2-25)	Private Garden	2022	Bacteria	Bacillota_A	Clostridia	Clostridiales	Clostridiaceae	Clostridium	Clostridium	ASV_ASV74	0.971324
1236666F1225675	27C_tarta	M	080-090	Elderly (71-100)	Curieuse	16.02.2020	Bacteria	Bacillota_A	Clostridia	Clostridiales	Clostridiaceae			ASV_ASV148	0.970252
1236709F1225718	BULBO_tarta	M	100 +	Centenarians (101+)	Parco Natura Viva	21.06.2021	Bacteria	Bacillota_A	Clostridia	Peptostreptococcales	Peptostreptococcaceae			ASV_ASV160	0.969521
1236667F1225676	29C_tarta	M	100 +	Centenarians (101+)	Curieuse	17.02.2020	Bacteria	Bacillota_A	Clostridia	Lachnospirales	Lachnospiraceae			ASV_ASV25	0.969389
1236682F1225691	25F_tarta	Not determined	005 -	Juveniles (2-25)	Curieuse (Nursery)	2022	Bacteria	Bacteroidota	Bacteroidia	Bacteroidales	UBA932	Bact-08	Bact-08	ASV_ASV54	0.968277
1236680F1225689	4N_tarta	Not determined	2	Juveniles (2-25)	Curieuse (Nursery)	17.02.2020	Bacteria	Pseudomonadota	Gammaproteobacteria	Pseudomonadales	Moraxellaceae	Acinetobacter	Acinetobacter	ASV_ASV418	0.967742
1236674F1225683	n8_tarta	Not determined	004-005	Juveniles (2-25)	Curieuse (Nursery)	14.02.2020	Bacteria	Bacillota_A	Clostridia					ASV_ASV338	0.967142
1236657F1225666	�	F	030-040	Adults (26-70)	Curieuse	14.02.2020	Bacteria	Bacillota_A	Clostridia	Lachnospirales	Lachnospiraceae			ASV_ASV2	0.966209
1236708F1225717	15C_tarta	M	080-090	Elderly (71-100)	Curieuse	15.02.2020	Bacteria	Bacillota_A	Clostridia	Clostridiales	Clostridiaceae	Clostridium	Clostridium	ASV_ASV36	0.963996
1236673F1225682	n6_tarta	M	070-080	Elderly (71-100)	Curieuse	14.02.2020	Bacteria	Bacillota_A	Clostridia	Lachnospirales	Lachnospiraceae			ASV_ASV14	0.9629
1236696F1225705	20C_tarta	F	040-050	Adults (26-70)	Curieuse	16.02.2020	Bacteria	Bacillota_A	Clostridia	Oscillospirales				ASV_ASV179	0.962606
1236702F1225711	3BG_tarta	F	030-040	Adults (26-70)	Botanical Garden	19.02.2020	Bacteria	Bacillota_A	Clostridia	TANB77	CAG-508	Scatovivens	Scatovivens	ASV_ASV220	0.962411
1236680F1225689	4N_tarta	Not determined	2	Juveniles (2-25)	Curieuse (Nursery)	17.02.2020	Bacteria	Bacillota	Bacilli	Bacillales	DSM-1321	Bacillus_AD	Bacillus_AD	ASV_ASV165	0.961768
1236693F1225702	8_tarta	F	100 +	Centenarians (101+)	Parco Natura Viva	21.06.2021	Bacteria	Bacillota_A	Clostridia	Lachnospirales	Lachnospiraceae			ASV_ASV66	0.958007
1236709F1225718	BULBO_tarta	M	100 +	Centenarians (101+)	Parco Natura Viva	21.06.2021	Bacteria	Bacillota_A	Clostridia	Clostridiales	Clostridiaceae	Clostridium	Clostridium	ASV_ASV103	0.95791
1236707F1225716	8BG_tarta	M	100 +	Centenarians (101+)	Botanical Garden	19.02.2020	RS_GCF_001729965.1~NZ_JRWK01000030.1 Archaea	Methanobacteriota	Methanobacteria	Methanobacteriales	Methanobacteriaceae	Methanosphaera	Methanosphaera sp001729965 [location=1..1480] [ssu_len=1480] [contig_len=1498]	ASV_ASV41	0.955591
1236706F1225715	7BG_tarta	F	050-060	Adults (26-70)	Botanical Garden	19.02.2020	Bacteria	Bacillota_G	UBA4882	UBA8346	UBA8346	Hydrogenispora	Hydrogenispora	ASV_ASV201	0.953075
1236672F1225681	10BG_tarta	M	040-050	Adults (26-70)	Botanical Garden	19.02.2020	Bacteria	Bacillota_A	Clostridia	Lachnospirales	Lachnospiraceae			ASV_ASV170	0.952988
1236666F1225675	27C_tarta	M	080-090	Elderly (71-100)	Curieuse	16.02.2020	Bacteria	Bacteroidota	Bacteroidia	Bacteroidales	WCHB1-69	UBA5429	UBA5429	ASV_ASV18	0.952788
1236698F1225707	22C_tarta	M	090-100	Elderly (71-100)	Curieuse	16.02.2020	Bacteria	Bacillota_A	Clostridia	Clostridiales	Clostridiaceae	Clostridium	Clostridium	ASV_ASV32	0.952604
1236662F1225671	n2_tarta	M	070-080	Elderly (71-100)	Curieuse	14.02.2020	Bacteria	Bacillota_A	Clostridia	Oscillospirales	Ruminococcaceae	Anaerofilum	Anaerofilum	ASV_ASV109	0.952502
1236661F1225670	9BG_tarta	M	090-100	Elderly (71-100)	Botanical Garden	18.02.2020	Bacteria	Bacteroidota	Bacteroidia	Bacteroidales	WCHB1-69	UBA5429	UBA5429	ASV_ASV18	0.951407
1236693F1225702	8_tarta	F	100 +	Centenarians (101+)	Parco Natura Viva	21.06.2021	Bacteria	Bacillota_A	Clostridia	Clostridiales	Clostridiaceae	Clostridium	Clostridium	ASV_ASV105	0.950434
1236678F1225687	2N_tarta	Not determined	002-003	Juveniles (2-25)	Curieuse (Nursery)	17.02.2020	Bacteria	Bacillota_A	Clostridia	Lachnospirales	Lachnospiraceae	Velocimicrobium	Velocimicrobium	ASV_ASV309	0.950107
1236661F1225670	9BG_tarta	M	090-100	Elderly (71-100)	Botanical Garden	18.02.2020	Bacteria	Bacteroidota	Bacteroidia	Bacteroidales	ZOR0009	Acetobacteroides	Acetobacteroides	ASV_ASV90	0.947997
1236663F1225672	19N_tarta	Not determined	004-005	Juveniles (2-25)	Curieuse (Nursery)	15.02.2020	Bacteria	Bacillota_A	Clostridia	Lachnospirales	Lachnospiraceae			ASV_ASV2	0.947758
1236707F1225716	8BG_tarta	M	100 +	Centenarians (101+)	Botanical Garden	19.02.2020	Bacteria	Bacillota_B	Desulfotomaculia	Desulfotomaculales				ASV_ASV97	0.947661
1236709F1225718	BULBO_tarta	M	100 +	Centenarians (101+)	Parco Natura Viva	21.06.2021	Bacteria	Bacillota_A	Clostridia	Clostridiales	Clostridiaceae	Inconstantimicrobium	Inconstantimicrobium	ASV_ASV38	0.946299
1236692F1225701	7_tarta	F	015 -	Juveniles (2-25)	Parco Natura Viva	21.06.2021	Bacteria	Bacillota_A	Clostridia	Lachnospirales	Cellulosilyticaceae	Cellulosilyticum	Cellulosilyticum	ASV_ASV75	0.946023
1236689F1225698	29F_tarta	Not determined	004-005	Juveniles (2-25)	Private Garden	2022	Bacteria	Bacillota_A	Clostridia	Lachnospirales	Lachnospiraceae			ASV_ASV151	0.945559
1236660F1225669	30C_tarta	M	090-100	Elderly (71-100)	Curieuse	17.02.2020	Bacteria	Bacillota_A	Clostridia	Lachnospirales	Lachnospiraceae			ASV_ASV2	0.945065
1236662F1225671	n2_tarta	M	070-080	Elderly (71-100)	Curieuse	14.02.2020	Bacteria	Bacteroidota	Bacteroidia	Bacteroidales				ASV_ASV4	0.944035
1236707F1225716	8BG_tarta	M	100 +	Centenarians (101+)	Botanical Garden	19.02.2020	Bacteria	Bacillota_A	Clostridia	Lachnospirales	Lachnospiraceae			ASV_ASV31	0.943695
1236681F1225690	24F_tarta	M	030-040	Adults (26-70)	Curieuse	2022	Bacteria	Bacillota	Bacilli	Bacillales	DSM-1321	Bacillus_AD	Bacillus_AD	ASV_ASV29	0.943137
1236687F1225696	18F_tarta	F	040-050	Adults (26-70)	Botanical Garden	2022	Bacteria	Bacillota_A	Clostridia	Lachnospirales	Lachnospiraceae			ASV_ASV66	0.939766
1236692F1225701	7_tarta	F	015 -	Juveniles (2-25)	Parco Natura Viva	21.06.2021	Bacteria	Bacillota_A	Clostridia	Lachnospirales	Lachnospiraceae	Velocimicrobium	Velocimicrobium	ASV_ASV116	0.939314
1236693F1225702	8_tarta	F	100 +	Centenarians (101+)	Parco Natura Viva	21.06.2021	Bacteria	Bacillota_A	Clostridia	Lachnospirales	Lachnospiraceae			ASV_ASV14	0.939074
1236680F1225689	4N_tarta	Not determined	2	Juveniles (2-25)	Curieuse (Nursery)	17.02.2020	Bacteria	Bacillota_A	Clostridia	Peptostreptococcales	Peptostreptococcaceae			ASV_ASV58	0.937873
1236663F1225672	19N_tarta	Not determined	004-005	Juveniles (2-25)	Curieuse (Nursery)	15.02.2020	Bacteria	Bacillota_A	Clostridia	Lachnospirales	Lachnospiraceae			ASV_ASV48	0.937484
1236657F1225666	�	F	030-040	Adults (26-70)	Curieuse	14.02.2020	Bacteria	Bacteroidota	Bacteroidia	Bacteroidales	UBA932	Bact-08	Bact-08	ASV_ASV54	0.937328
1236668F1225677	22F_tarta	M	080-090	Elderly (71-100)	Curieuse	2022	Bacteria	Spirochaetota	Spirochaetia	Treponematales	Treponemataceae	Treponema_C	Treponema_C	ASV_ASV15	0.937142
1236675F1225684	n9_tarta	M	070-080	Elderly (71-100)	Curieuse	15.02.2020	Bacteria	Bacillota	Bacilli	ML615J-28	CAG-313	UMGS75	UMGS75	ASV_ASV331	0.936685
1236683F1225692	26_tarta	Not determined	001-002	Juveniles (2-25)	Curieuse (Nursery)	2022	Bacteria	Bacillota_A	Clostridia	Clostridiales	Clostridiaceae	Clostridium	Clostridium	ASV_ASV78	0.935273
1236671F1225680	ROGER_tarta	M	100 +	Centenarians (101+)	Parco Natura Viva	21.06.2021	Bacteria	Bacillota_A	Clostridia	Clostridiales	Clostridiaceae			ASV_ASV129	0.934856
1236701F1225710	2BG_tarta	F	040-050	Adults (26-70)	Botanical Garden	19.02.2020	Bacteria	Bacillota_A	Clostridia	Oscillospirales	Oscillospiraceae	UBA1774	UBA1774	ASV_ASV62	0.934384
1236691F1225700	31F_tarta	Not determined	004-005	Juveniles (2-25)	Private Garden	2022	Bacteria	Bacillota_A	Clostridia	Lachnospirales	Cellulosilyticaceae	Cellulosilyticum	Cellulosilyticum	ASV_ASV76	0.934141
1236661F1225670	9BG_tarta	M	090-100	Elderly (71-100)	Botanical Garden	18.02.2020	Bacteria	Bacteroidota	Bacteroidia	Bacteroidales	Bacteroidaceae	43-108	43-108	ASV_ASV53	0.930946
1236683F1225692	26_tarta	Not determined	001-002	Juveniles (2-25)	Curieuse (Nursery)	2022	Bacteria	Bacteroidota	Bacteroidia	Bacteroidales	UBA932			ASV_ASV83	0.930325
1236671F1225680	ROGER_tarta	M	100 +	Centenarians (101+)	Parco Natura Viva	21.06.2021	Bacteria	Bacillota_A	Clostridia	Clostridiales	Clostridiaceae	Clostridium	Clostridium	ASV_ASV78	0.928273
1236677F1225686	1N_tarta	Not determined	001-002	Juveniles (2-25)	Curieuse (Nursery)	17.02.2020	Bacteria	Bacteroidota	Bacteroidia	Bacteroidales	UBA932	Coprenecus	Coprenecus	ASV_ASV3	0.9278
1236689F1225698	29F_tarta	Not determined	004-005	Juveniles (2-25)	Private Garden	2022	Bacteria	Bacillota_A	Clostridia	Lachnospirales	Lachnospiraceae			ASV_ASV69	0.927524
1236695F1225704	11_tarta	F	015 -	Juveniles (2-25)	Parco Natura Viva	21.06.2021	Bacteria	Bacillota_A	Clostridia	Clostridiales	Clostridiaceae	Clostridium	Clostridium	ASV_ASV300	0.926981
1236672F1225681	10BG_tarta	M	040-050	Adults (26-70)	Botanical Garden	19.02.2020	Bacteria	Spirochaetota	Spirochaetia	Treponematales	UBA12059	SZUA-370	SZUA-370	ASV_ASV197	0.926918
1236688F1225697	19F_tarta	F	005-006	Juveniles (2-25)	Botanical Garden	2022	Bacteria	Bacillota_A	Clostridia	Lachnospirales	Lachnospiraceae			ASV_ASV31	0.926712
1236704F1225713	5BG_tarta	M	080-090	Elderly (71-100)	Botanical Garden	19.02.2020	Bacteria	Bacteroidota	Bacteroidia	Bacteroidales				ASV_ASV181	0.92548
1236671F1225680	ROGER_tarta	M	100 +	Centenarians (101+)	Parco Natura Viva	21.06.2021	Bacteria	Bacillota_A	Clostridia	Lachnospirales	Lachnospiraceae			ASV_ASV28	0.924981
1236687F1225696	18F_tarta	F	040-050	Adults (26-70)	Botanical Garden	2022	Bacteria	Bacillota_A	Clostridia	Clostridiales	Caloramatoraceae			ASV_ASV234	0.923563
1236691F1225700	31F_tarta	Not determined	004-005	Juveniles (2-25)	Private Garden	2022	Bacteria	Bacillota	Bacilli	Bacillales	DSM-1321	Bacillus_AD	Bacillus_AD	ASV_ASV71	0.923477
1236677F1225686	1N_tarta	Not determined	001-002	Juveniles (2-25)	Curieuse (Nursery)	17.02.2020	Bacteria	Bacillota_A	Clostridia	Christensenellales	UBA1242			ASV_ASV198	0.922177
1236660F1225669	30C_tarta	M	090-100	Elderly (71-100)	Curieuse	17.02.2020	Bacteria	Bacillota	Bacilli	Bacillales	DSM-1321	Pradoshia	Pradoshia	ASV_ASV144	0.921788
1236682F1225691	25F_tarta	Not determined	005 -	Juveniles (2-25)	Curieuse (Nursery)	2022	Bacteria	Bacillota_A	Clostridia	Peptostreptococcales	Peptostreptococcaceae	Terrisporobacter	Terrisporobacter	ASV_ASV10	0.920928
1236706F1225715	7BG_tarta	F	050-060	Adults (26-70)	Botanical Garden	19.02.2020	Bacteria	Bacillota_A	Clostridia	Oscillospirales	Ruminococcaceae	Ruminococcus_D	Ruminococcus_D	ASV_ASV146	0.920384
1236700F1225709	1BG_tarta	F	030-040	Adults (26-70)	Botanical Garden	19.02.2020	Bacteria	Bacillota_A	Clostridia	Oscillospirales	Oscillospiraceae	UBA1774	UBA1774	ASV_ASV62	0.920213
1236693F1225702	8_tarta	F	100 +	Centenarians (101+)	Parco Natura Viva	21.06.2021	Bacteria	Bacillota_A	Clostridia	Lachnospirales	Lachnospiraceae	Velocimicrobium	Velocimicrobium	ASV_ASV116	0.920141
1236667F1225676	29C_tarta	M	100 +	Centenarians (101+)	Curieuse	17.02.2020	Bacteria	Bacillota	Bacilli	ML615J-28	CAG-313	UMGS75	UMGS75	ASV_ASV117	0.919842
1236687F1225696	18F_tarta	F	040-050	Adults (26-70)	Botanical Garden	2022	Bacteria	Bacillota_A	Clostridia	TANB77	CAG-508			ASV_ASV368	0.919512
1236699F1225708	31C_tarta	Not determined	004-005	Juveniles (2-25)	Curieuse (Nursery)	17.02.2020	Bacteria	Bacillota	Bacilli	Bacillales	DSM-1321	Bacillus_AD	Bacillus_AD	ASV_ASV35	0.919118
1236669F1225678	17C_tarta	M	060-070	Adults (26-70)	Curieuse	15.02.2020	Bacteria	Bacillota_A	Clostridia	Clostridiales	Clostridiaceae	Clostridium	Clostridium	ASV_ASV36	0.918993
1236675F1225684	n9_tarta	M	070-080	Elderly (71-100)	Curieuse	15.02.2020	Bacteria	Bacillota_A	Clostridia	Peptostreptococcales	Peptostreptococcaceae			ASV_ASV268	0.9189
1236704F1225713	5BG_tarta	M	080-090	Elderly (71-100)	Botanical Garden	19.02.2020	Bacteria	Verrucomicrobiota	Verrucomicrobiae	Opitutales	UBA953	Spyradosoma	Spyradosoma	ASV_ASV219	0.918249
1236705F1225714	6BG_tarta	M	040-050	Adults (26-70)	Botanical Garden	19.02.2020	Bacteria	Bacteroidota	Bacteroidia	Bacteroidales				ASV_ASV46	0.917307
1236661F1225670	9BG_tarta	M	090-100	Elderly (71-100)	Botanical Garden	18.02.2020	Bacteria	Bacteroidota	Bacteroidia	Bacteroidales	UBA932	Coprenecus	Coprenecus	ASV_ASV3	0.917306
1236677F1225686	1N_tarta	Not determined	001-002	Juveniles (2-25)	Curieuse (Nursery)	17.02.2020	Bacteria	Bacteroidota	Kapabacteria	Kapabacteriales				ASV_ASV33	0.916554
1236701F1225710	2BG_tarta	F	040-050	Adults (26-70)	Botanical Garden	19.02.2020	Bacteria	Bacillota_A	Clostridia	Lachnospirales	Lachnospiraceae			ASV_ASV88	0.916415
1236707F1225716	8BG_tarta	M	100 +	Centenarians (101+)	Botanical Garden	19.02.2020	Bacteria	Bacillota_A	Clostridia	Clostridiales	Clostridiaceae	Clostridium	Clostridium	ASV_ASV222	0.91594
1236688F1225697	19F_tarta	F	005-006	Juveniles (2-25)	Botanical Garden	2022	Bacteria	Bacillota_A	Clostridia	Clostridiales	Clostridiaceae	Clostridium	Clostridium	ASV_ASV836	0.915636
1236679F1225688	3N_tarta	Not determined	002-003	Juveniles (2-25)	Curieuse (Nursery)	17.02.2020	Bacteria	Bacillota_A	Clostridia	Lachnospirales	Lachnospiraceae			ASV_ASV31	0.915323
1236686F1225695	17F_tarta	M	080-090	Elderly (71-100)	Botanical Garden	2022	Bacteria	Bacteroidota	Bacteroidia	Bacteroidales	Bacteroidaceae			ASV_ASV224	0.914716
1236663F1225672	19N_tarta	Not determined	004-005	Juveniles (2-25)	Curieuse (Nursery)	15.02.2020	Bacteria	Bacillota_A	Clostridia	Lachnospirales	Lachnospiraceae			ASV_ASV14	0.914368
1236663F1225672	19N_tarta	Not determined	004-005	Juveniles (2-25)	Curieuse (Nursery)	15.02.2020	Bacteria	Bacillota_A	Clostridia	Christensenellales	CAG-138			ASV_ASV318	0.914368
1236706F1225715	7BG_tarta	F	050-060	Adults (26-70)	Botanical Garden	19.02.2020	Bacteria	Bacillota_A	Clostridia	Lachnospirales	Lachnospiraceae			ASV_ASV2	0.91284
1236698F1225707	22C_tarta	M	090-100	Elderly (71-100)	Curieuse	16.02.2020	Bacteria	Bacillota_A	Clostridia	Clostridiales	Clostridiaceae	Clostridium	Clostridium	ASV_ASV20	0.912494
1236683F1225692	26_tarta	Not determined	001-002	Juveniles (2-25)	Curieuse (Nursery)	2022	Bacteria	Bacteroidota	Bacteroidia	Bacteroidales	WCHB1-69	UBA5429	UBA5429	ASV_ASV125	0.91053
1236673F1225682	n6_tarta	M	070-080	Elderly (71-100)	Curieuse	14.02.2020	Bacteria	Bacillota	Bacilli	RF39	UBA660	CAJOJR01	CAJOJR01	ASV_ASV684	0.910305
1236684F1225693	27_tarta	Not determined	001-002	Juveniles (2-25)	Curieuse (Nursery)	2022								ASV_ASV359	0.909773
1236702F1225711	3BG_tarta	F	030-040	Adults (26-70)	Botanical Garden	19.02.2020	Bacteria	Bacteroidota	Bacteroidia	Bacteroidales				ASV_ASV4	0.909647
1236688F1225697	19F_tarta	F	005-006	Juveniles (2-25)	Botanical Garden	2022	Bacteria	Bacillota_A	Clostridia	Clostridiales	Clostridiaceae	Inconstantimicrobium	Inconstantimicrobium	ASV_ASV633	0.908252
1236683F1225692	26_tarta	Not determined	001-002	Juveniles (2-25)	Curieuse (Nursery)	2022	Bacteria	Bacteroidota	Bacteroidia	Bacteroidales	WCHB1-69	UBA5429	UBA5429	ASV_ASV23	0.908056
1236679F1225688	3N_tarta	Not determined	002-003	Juveniles (2-25)	Curieuse (Nursery)	17.02.2020	Bacteria	Bacteroidota	Bacteroidia	Bacteroidales				ASV_ASV13	0.907663
1236673F1225682	n6_tarta	M	070-080	Elderly (71-100)	Curieuse	14.02.2020	Bacteria	Bacillota_A	Clostridia	Lachnospirales	Lachnospiraceae			ASV_ASV2	0.906259
1236681F1225690	24F_tarta	M	030-040	Adults (26-70)	Curieuse	2022	Bacteria	Bacillota_A	Clostridia	Lachnospirales	Lachnospiraceae			ASV_ASV17	0.905611
1236676F1225685	n10_tarta	M	090-100	Elderly (71-100)	Curieuse	15.02.2020	Bacteria	Bacteroidota	Bacteroidia	Bacteroidales	UBA932	Bact-08	Bact-08	ASV_ASV22	0.90475
1236658F1225667	24C_tarta	F	030-040	Adults (26-70)	Curieuse	16.02.2020	Bacteria	Spirochaetota	Spirochaetia	Treponematales	Treponemataceae			ASV_ASV172	0.90441
1236701F1225710	2BG_tarta	F	040-050	Adults (26-70)	Botanical Garden	19.02.2020	Bacteria	Bacillota_A	Clostridia	Clostridiales	Clostridiaceae			ASV_ASV140	0.901441
1236704F1225713	5BG_tarta	M	080-090	Elderly (71-100)	Botanical Garden	19.02.2020	Bacteria	Bacteroidota	Bacteroidia	Bacteroidales	UBA932	Bact-08	Bact-08	ASV_ASV303	0.901379
1236659F1225668	28C_tarta	M	080-090	Elderly (71-100)	Curieuse	16.02.2020	Bacteria	Bacteroidota	Bacteroidia	Bacteroidales	UBA932	Bact-08	Bact-08	ASV_ASV54	0.901246
1236664F1225673	12GH_tarta (=20C)	F	040-050	Adults (26-70)	Curieuse	15.02.2020	Bacteria	Bacillota_A	Clostridia	Lachnospirales	Lachnospiraceae			ASV_ASV2	0.900651
1236667F1225676	29C_tarta	M	100 +	Centenarians (101+)	Curieuse	17.02.2020	Bacteria	Bacteroidota	Kapabacteria	Kapabacteriales				ASV_ASV33	0.900455
1236674F1225683	n8_tarta	Not determined	004-005	Juveniles (2-25)	Curieuse (Nursery)	14.02.2020								ASV_ASV47	0.89688
1236696F1225705	20C_tarta	F	040-050	Adults (26-70)	Curieuse	16.02.2020	Bacteria	Bacillota_A	Clostridia	Oscillospirales	Oscillospiraceae	UBA1774	UBA1774	ASV_ASV62	0.896787
1236665F1225674	23C_tarta	M	100 +	Centenarians (101+)	Curieuse	16.02.2020	Bacteria	Bacteroidota	Bacteroidia	Bacteroidales	WCHB1-69	UBA5429	UBA5429	ASV_ASV23	0.89531
1236709F1225718	BULBO_tarta	M	100 +	Centenarians (101+)	Parco Natura Viva	21.06.2021	Bacteria	Bacillota_A	Clostridia	Lachnospirales	Lachnospiraceae			ASV_ASV283	0.894049
1236705F1225714	6BG_tarta	M	040-050	Adults (26-70)	Botanical Garden	19.02.2020	Bacteria	Bacteroidota	Bacteroidia	Bacteroidales				ASV_ASV272	0.893613
1236657F1225666	�	F	030-040	Adults (26-70)	Curieuse	14.02.2020	Bacteria	Bacteroidota	Bacteroidia	Bacteroidales				ASV_ASV4	0.892693
1236701F1225710	2BG_tarta	F	040-050	Adults (26-70)	Botanical Garden	19.02.2020	Bacteria	Bacteroidota	Bacteroidia	Bacteroidales	WCHB1-69	UBA5429	UBA5429	ASV_ASV23	0.892456
1236698F1225707	22C_tarta	M	090-100	Elderly (71-100)	Curieuse	16.02.2020	Bacteria	Bacteroidota	Bacteroidia	Bacteroidales				ASV_ASV4	0.892439
1236680F1225689	4N_tarta	Not determined	2	Juveniles (2-25)	Curieuse (Nursery)	17.02.2020	Bacteria	Bacillota	Bacilli	Bacillales	DSM-1321	Bacillus_AD	Bacillus_AD	ASV_ASV35	0.890084
1236691F1225700	31F_tarta	Not determined	004-005	Juveniles (2-25)	Private Garden	2022	Bacteria	Bacillota_A	Clostridia	Clostridiales	Clostridiaceae	Clostridium	Clostridium	ASV_ASV20	0.889353
1236669F1225678	17C_tarta	M	060-070	Adults (26-70)	Curieuse	15.02.2020	Bacteria	Bacillota_A	Clostridia	Clostridiales	Clostridiaceae	Clostridium	Clostridium	ASV_ASV205	0.889261
1236709F1225718	BULBO_tarta	M	100 +	Centenarians (101+)	Parco Natura Viva	21.06.2021	Bacteria	Bacillota_A	Clostridia	Clostridiales	Clostridiaceae	Sarcina	Sarcina	ASV_ASV194	0.888244
1236704F1225713	5BG_tarta	M	080-090	Elderly (71-100)	Botanical Garden	19.02.2020	Bacteria	Bacillota_A	Clostridia	Clostridiales	Clostridiaceae	Clostridium	Clostridium	ASV_ASV111	0.886918
1236676F1225685	n10_tarta	M	090-100	Elderly (71-100)	Curieuse	15.02.2020								ASV_ASV34	0.885901
1236662F1225671	n2_tarta	M	070-080	Elderly (71-100)	Curieuse	14.02.2020	Bacteria	Bacteroidota	Kapabacteria	Kapabacteriales				ASV_ASV33	0.884768
1236674F1225683	n8_tarta	Not determined	004-005	Juveniles (2-25)	Curieuse (Nursery)	14.02.2020	Bacteria	Bacillota_A	Clostridia	Oscillospirales	Acutalibacteraceae			ASV_ASV212	0.88448
1236707F1225716	8BG_tarta	M	100 +	Centenarians (101+)	Botanical Garden	19.02.2020	Bacteria	Spirochaetota	Spirochaetia	Treponematales	Treponemataceae	Treponema_C	Treponema_C	ASV_ASV15	0.884219
1236680F1225689	4N_tarta	Not determined	2	Juveniles (2-25)	Curieuse (Nursery)	17.02.2020	Bacteria	Bacteroidota	Bacteroidia	Chitinophagales	Chitinophagaceae	Edaphocola	Edaphocola	ASV_ASV393	0.88411
1236680F1225689	4N_tarta	Not determined	2	Juveniles (2-25)	Curieuse (Nursery)	17.02.2020	Bacteria	Bacteroidota	Bacteroidia	Flavobacteriales	Flavobacteriaceae	Flavobacterium	Flavobacterium	ASV_ASV437	0.88411
1236661F1225670	9BG_tarta	M	090-100	Elderly (71-100)	Botanical Garden	18.02.2020	Bacteria	Bacillota_A	Clostridia	Oscillospirales	Ruminococcaceae	Ruminococcus_D	Ruminococcus_D	ASV_ASV146	0.883205
1236661F1225670	9BG_tarta	M	090-100	Elderly (71-100)	Botanical Garden	18.02.2020	Bacteria	Bacteroidota	Bacteroidia	Bacteroidales	ZOR0009	Acetobacteroides	Acetobacteroides	ASV_ASV244	0.883205
1236682F1225691	25F_tarta	Not determined	005 -	Juveniles (2-25)	Curieuse (Nursery)	2022	Bacteria	Bacillota_A	Clostridia	Lachnospirales	Lachnospiraceae			ASV_ASV28	0.883049
1236688F1225697	19F_tarta	F	005-006	Juveniles (2-25)	Botanical Garden	2022	Bacteria	Bacillota_B	Desulfotomaculia	Desulfotomaculales				ASV_ASV97	0.882407
1236686F1225695	17F_tarta	M	080-090	Elderly (71-100)	Botanical Garden	2022	Bacteria	Bacillota_A	Clostridia	Lachnospirales	Lachnospiraceae			ASV_ASV2	0.881087
1236678F1225687	2N_tarta	Not determined	002-003	Juveniles (2-25)	Curieuse (Nursery)	17.02.2020	Bacteria	Bacillota_A	Clostridia	Lachnospirales	Lachnospiraceae			ASV_ASV110	0.880466
1236705F1225714	6BG_tarta	M	040-050	Adults (26-70)	Botanical Garden	19.02.2020								ASV_ASV112	0.880073
1236661F1225670	9BG_tarta	M	090-100	Elderly (71-100)	Botanical Garden	18.02.2020	Bacteria	Bacillota_A	Clostridia	TANB77	CAG-508	Scatovivens	Scatovivens	ASV_ASV139	0.879795
1236657F1225666	�	F	030-040	Adults (26-70)	Curieuse	14.02.2020	Bacteria	Bacillota_A	Clostridia	TANB77	CAG-508	Scatovivens	Scatovivens	ASV_ASV529	0.879565
1236708F1225717	15C_tarta	M	080-090	Elderly (71-100)	Curieuse	15.02.2020	Bacteria	Bacteroidota	Bacteroidia	Bacteroidales	UBA932			ASV_ASV37	0.878134
1236685F1225694	16F_tarta	M	080-090	Elderly (71-100)	Botanical Garden	2022	Bacteria	Bacteroidota	Bacteroidia	Bacteroidales	Bacteroidaceae			ASV_ASV449	0.877906
1236704F1225713	5BG_tarta	M	080-090	Elderly (71-100)	Botanical Garden	19.02.2020	Bacteria	Spirochaetota	Spirochaetia	Treponematales	UBA12059	SZUA-370	SZUA-370	ASV_ASV95	0.877278
1236709F1225718	BULBO_tarta	M	100 +	Centenarians (101+)	Parco Natura Viva	21.06.2021	Bacteria	Bacillota_A	Clostridia	Clostridiales	Clostridiaceae	Clostridium	Clostridium	ASV_ASV92	0.876633
1236661F1225670	9BG_tarta	M	090-100	Elderly (71-100)	Botanical Garden	18.02.2020	Bacteria	Bacillota_A	Clostridia	Lachnospirales	Lachnospiraceae	Velocimicrobium	Velocimicrobium	ASV_ASV155	0.876385
1236696F1225705	20C_tarta	F	040-050	Adults (26-70)	Curieuse	16.02.2020	Bacteria	Bacteroidota	Bacteroidia	Bacteroidales	UBA932			ASV_ASV65	0.876219
1236695F1225704	11_tarta	F	015 -	Juveniles (2-25)	Parco Natura Viva	21.06.2021	Bacteria	Bacillota_A	Clostridia	Lachnospirales	Cellulosilyticaceae	Cellulosilyticum	Cellulosilyticum	ASV_ASV76	0.875918
1236687F1225696	18F_tarta	F	040-050	Adults (26-70)	Botanical Garden	2022								ASV_ASV112	0.874954
1236675F1225684	n9_tarta	M	070-080	Elderly (71-100)	Curieuse	15.02.2020	Bacteria	Bacillota_A	Clostridia	Clostridiales	Clostridiaceae	Clostridium_AA	Clostridium_AA	ASV_ASV61	0.874437
1236668F1225677	22F_tarta	M	080-090	Elderly (71-100)	Curieuse	2022	Bacteria	Bacillota_A	Clostridia	Lachnospirales	Lachnospiraceae			ASV_ASV14	0.873246
1236661F1225670	9BG_tarta	M	090-100	Elderly (71-100)	Botanical Garden	18.02.2020	Bacteria	Bacillota_A	Clostridia	Lachnospirales	Lachnospiraceae			ASV_ASV14	0.872975
1236691F1225700	31F_tarta	Not determined	004-005	Juveniles (2-25)	Private Garden	2022	Bacteria	Actinomycetota	Actinomycetia	Mycobacteriales	Mycobacteriaceae	Rhodococcus	Rhodococcus	ASV_ASV595	0.872291
1236680F1225689	4N_tarta	Not determined	2	Juveniles (2-25)	Curieuse (Nursery)	17.02.2020	Bacteria	Bacillota_A	Clostridia	Lachnospirales	Lachnospiraceae			ASV_ASV31	0.872162
1236695F1225704	11_tarta	F	015 -	Juveniles (2-25)	Parco Natura Viva	21.06.2021	Bacteria	Bacillota_A	Clostridia	Lachnospirales	Cellulosilyticaceae	Cellulosilyticum	Cellulosilyticum	ASV_ASV50	0.87199
1236657F1225666	�	F	030-040	Adults (26-70)	Curieuse	14.02.2020	Bacteria	Bacillota_A	Clostridia	TANB77	CAG-508	Scatovivens	Scatovivens	ASV_ASV220	0.871689
1236683F1225692	26_tarta	Not determined	001-002	Juveniles (2-25)	Curieuse (Nursery)	2022	Bacteria	Bacillota_A	Clostridia	Peptostreptococcales	Peptostreptococcaceae	Terrisporobacter	Terrisporobacter	ASV_ASV10	0.870942
1236670F1225679	4Na_tarta	Not determined	002-003	Juveniles (2-25)	Curieuse (Nursery)	17.02.2020	Bacteria	Bacillota_A	Clostridia	Lachnospirales	Lachnospiraceae			ASV_ASV14	0.870792
1236695F1225704	11_tarta	F	015 -	Juveniles (2-25)	Parco Natura Viva	21.06.2021	Bacteria	Bacillota_A	Clostridia	Lachnospirales	Lachnospiraceae			ASV_ASV251	0.870026
1236673F1225682	n6_tarta	M	070-080	Elderly (71-100)	Curieuse	14.02.2020	Bacteria	Bacillota_A	Clostridia	Oscillospirales	Oscillospiraceae			ASV_ASV388	0.869847
1236684F1225693	27_tarta	Not determined	001-002	Juveniles (2-25)	Curieuse (Nursery)	2022	Bacteria	Pseudomonadota	Gammaproteobacteria	Burkholderiales				ASV_ASV128	0.869783
1236690F1225699	30F_tarta	Not determined	004-005	Juveniles (2-25)	Private Garden	2022	Bacteria	Bacillota_A	Clostridia	Lachnospirales	Cellulosilyticaceae	Cellulosilyticum	Cellulosilyticum	ASV_ASV76	0.868636
1236675F1225684	n9_tarta	M	070-080	Elderly (71-100)	Curieuse	15.02.2020	Bacteria	Bacillota	Bacilli	Lactobacillales	Streptococcaceae	Streptococcus	Streptococcus	ASV_ASV242	0.868508
1236675F1225684	n9_tarta	M	070-080	Elderly (71-100)	Curieuse	15.02.2020	Bacteria	Bacteroidota	Bacteroidia	Bacteroidales	UBA932	Coprenecus	Coprenecus	ASV_ASV3	0.868508
1236663F1225672	19N_tarta	Not determined	004-005	Juveniles (2-25)	Curieuse (Nursery)	15.02.2020	Bacteria	Bacteroidota	Bacteroidia	Bacteroidales	UBA932			ASV_ASV65	0.868136
1236696F1225705	20C_tarta	F	040-050	Adults (26-70)	Curieuse	16.02.2020	Bacteria	Bacteroidota	Bacteroidia	Bacteroidales				ASV_ASV12	0.867991
1236661F1225670	9BG_tarta	M	090-100	Elderly (71-100)	Botanical Garden	18.02.2020	Bacteria	Spirochaetota	Spirochaetia	Treponematales	Treponemataceae			ASV_ASV135	0.866155
1236685F1225694	16F_tarta	M	080-090	Elderly (71-100)	Botanical Garden	2022	Bacteria	Bacteroidota	Bacteroidia	Bacteroidales	Bacteroidaceae	Prevotella	Prevotella	ASV_ASV200	0.866082
1236681F1225690	24F_tarta	M	030-040	Adults (26-70)	Curieuse	2022	Bacteria	Bacillota_A	Clostridia	Clostridiales	Clostridiaceae	Clostridium	Clostridium	ASV_ASV78	0.865584
1236692F1225701	7_tarta	F	015 -	Juveniles (2-25)	Parco Natura Viva	21.06.2021	Bacteria	Bacillota_A	Clostridia	Peptostreptococcales	Peptostreptococcaceae			ASV_ASV160	0.86551
1236668F1225677	22F_tarta	M	080-090	Elderly (71-100)	Curieuse	2022	Bacteria	Bacteroidota	Bacteroidia	Bacteroidales	WCHB1-69	UBA1205	UBA1205	ASV_ASV67	0.865259
1236707F1225716	8BG_tarta	M	100 +	Centenarians (101+)	Botanical Garden	19.02.2020	Bacteria	Bacillota_A	Clostridia	Peptostreptococcales	Peptostreptococcaceae	Terrisporobacter	Terrisporobacter	ASV_ASV10	0.864393
1236707F1225716	8BG_tarta	M	100 +	Centenarians (101+)	Botanical Garden	19.02.2020	Bacteria	Bacillota_A	Clostridia	Clostridiales	Clostridiaceae	Clostridium	Clostridium	ASV_ASV64	0.864393
1236672F1225681	10BG_tarta	M	040-050	Adults (26-70)	Botanical Garden	19.02.2020								ASV_ASV107	0.863193
1236689F1225698	29F_tarta	Not determined	004-005	Juveniles (2-25)	Private Garden	2022	Bacteria	Bacillota_A	Clostridia	Peptostreptococcales	Peptostreptococcaceae	Terrisporobacter	Terrisporobacter	ASV_ASV10	0.863113
1236669F1225678	17C_tarta	M	060-070	Adults (26-70)	Curieuse	15.02.2020	Bacteria	Bacillota_A	Clostridia	Lachnospirales	Lachnospiraceae			ASV_ASV17	0.862232
1236673F1225682	n6_tarta	M	070-080	Elderly (71-100)	Curieuse	14.02.2020	Bacteria	Bacillota_A	Clostridia	Lachnospirales	Lachnospiraceae			ASV_ASV25	0.861755
1236679F1225688	3N_tarta	Not determined	002-003	Juveniles (2-25)	Curieuse (Nursery)	17.02.2020	Bacteria	Bacillota_A	Clostridia	Lachnospirales	Lachnospiraceae			ASV_ASV25	0.861706
1236699F1225708	31C_tarta	Not determined	004-005	Juveniles (2-25)	Curieuse (Nursery)	17.02.2020	Bacteria	Bacillota_A	Clostridia	Oscillospirales	Acutalibacteraceae			ASV_ASV410	0.860907
1236676F1225685	n10_tarta	M	090-100	Elderly (71-100)	Curieuse	15.02.2020	Bacteria	Bacillota_A	Clostridia	Lachnospirales	Lachnospiraceae			ASV_ASV118	0.860769
1236695F1225704	11_tarta	F	015 -	Juveniles (2-25)	Parco Natura Viva	21.06.2021	Bacteria	Bacillota_A	Clostridia	Lachnospirales	Lachnospiraceae			ASV_ASV28	0.860207
1236657F1225666	�	F	030-040	Adults (26-70)	Curieuse	14.02.2020	Bacteria	Bacillota_A	Clostridia	Oscillospirales	Oscillospiraceae	UBA1774	UBA1774	ASV_ASV62	0.858561
1236697F1225706	21C_tarta	M	080-090	Elderly (71-100)	Curieuse	16.02.2020	Bacteria	Bacillota_A	Clostridia	Lachnospirales	Lachnospiraceae			ASV_ASV297	0.857134
1236664F1225673	12GH_tarta (=20C)	F	040-050	Adults (26-70)	Curieuse	15.02.2020								ASV_ASV82	0.856773
1236707F1225716	8BG_tarta	M	100 +	Centenarians (101+)	Botanical Garden	19.02.2020	Bacteria	Bacteroidota	Bacteroidia	Bacteroidales	WCHB1-69	UBA5429	UBA5429	ASV_ASV18	0.856463
1236690F1225699	30F_tarta	Not determined	004-005	Juveniles (2-25)	Private Garden	2022	Bacteria	Bacillota_A	Clostridia	Clostridiales	Clostridiaceae	Clostridium	Clostridium	ASV_ASV92	0.855272
1236664F1225673	12GH_tarta (=20C)	F	040-050	Adults (26-70)	Curieuse	15.02.2020	Bacteria	Bacteroidota	Bacteroidia	Bacteroidales	UBA932	Coprenecus	Coprenecus	ASV_ASV3	0.852155
1236693F1225702	8_tarta	F	100 +	Centenarians (101+)	Parco Natura Viva	21.06.2021	Bacteria	Bacteroidota	Bacteroidia	Bacteroidales	WCHB1-69	UBA5429	UBA5429	ASV_ASV18	0.851982
1236699F1225708	31C_tarta	Not determined	004-005	Juveniles (2-25)	Curieuse (Nursery)	17.02.2020	Bacteria	Bacillota_A	Clostridia	Lachnospirales	Lachnospiraceae			ASV_ASV31	0.851716
1236678F1225687	2N_tarta	Not determined	002-003	Juveniles (2-25)	Curieuse (Nursery)	17.02.2020	Bacteria	Pseudomonadota	Gammaproteobacteria	Burkholderiales				ASV_ASV128	0.850619
1236678F1225687	2N_tarta	Not determined	002-003	Juveniles (2-25)	Curieuse (Nursery)	17.02.2020	Bacteria	Bacillota_A	Clostridia	Lachnospirales	Lachnospiraceae	Anaerocolumna	Anaerocolumna	ASV_ASV182	0.850619
1236685F1225694	16F_tarta	M	080-090	Elderly (71-100)	Botanical Garden	2022	Bacteria	Spirochaetota	Spirochaetia	Treponematales	Treponemataceae			ASV_ASV135	0.849825
1236661F1225670	9BG_tarta	M	090-100	Elderly (71-100)	Botanical Garden	18.02.2020	Bacteria	Bacteroidota	Bacteroidia	Bacteroidales	UBA932			ASV_ASV183	0.849105
1236680F1225689	4N_tarta	Not determined	2	Juveniles (2-25)	Curieuse (Nursery)	17.02.2020	Bacteria	Pseudomonadota	Alphaproteobacteria	Rhodobacterales	Rhodobacteraceae	Pseudogemmobacter	Pseudogemmobacter	ASV_ASV575	0.848268
1236657F1225666	�	F	030-040	Adults (26-70)	Curieuse	14.02.2020	Bacteria	Bacillota_A	Clostridia	Lachnospirales	Lachnospiraceae	Velocimicrobium	Velocimicrobium	ASV_ASV256	0.848058
1236709F1225718	BULBO_tarta	M	100 +	Centenarians (101+)	Parco Natura Viva	21.06.2021	Bacteria	Bacillota_A	Clostridia	Lachnospirales	Lachnospiraceae	Velocimicrobium	Velocimicrobium	ASV_ASV155	0.847605
1236661F1225670	9BG_tarta	M	090-100	Elderly (71-100)	Botanical Garden	18.02.2020	Bacteria	Bacteroidota	Bacteroidia	Bacteroidales	WCHB1-69	UBA5429	UBA5429	ASV_ASV21	0.845695
1236675F1225684	n9_tarta	M	070-080	Elderly (71-100)	Curieuse	15.02.2020	Bacteria	Bacteroidota	Bacteroidia	Bacteroidales	WCHB1-69	UBA1205	UBA1205	ASV_ASV67	0.844795
1236668F1225677	22F_tarta	M	080-090	Elderly (71-100)	Curieuse	2022	Bacteria	Bacillota_A	Clostridia	Clostridiales	Clostridiaceae	Clostridium	Clostridium	ASV_ASV36	0.84396
1236696F1225705	20C_tarta	F	040-050	Adults (26-70)	Curieuse	16.02.2020	Bacteria	Bacillota_A	Clostridia	Peptostreptococcales	Peptostreptococcaceae			ASV_ASV58	0.843309
1236687F1225696	18F_tarta	F	040-050	Adults (26-70)	Botanical Garden	2022	Bacteria	Bacteroidota	Bacteroidia	Bacteroidales	Paludibacteraceae			ASV_ASV611	0.842549
1236695F1225704	11_tarta	F	015 -	Juveniles (2-25)	Parco Natura Viva	21.06.2021	Bacteria	Bacillota_A	Clostridia	Clostridiales	Clostridiaceae	Clostridium	Clostridium	ASV_ASV68	0.842531
1236699F1225708	31C_tarta	Not determined	004-005	Juveniles (2-25)	Curieuse (Nursery)	17.02.2020								ASV_ASV47	0.842525
1236688F1225697	19F_tarta	F	005-006	Juveniles (2-25)	Botanical Garden	2022	Bacteria	Bacillota_A	Clostridia	Lachnospirales	Lachnospiraceae			ASV_ASV819	0.841794
1236665F1225674	23C_tarta	M	100 +	Centenarians (101+)	Curieuse	16.02.2020	Bacteria	Bacillota_A	Clostridia	Clostridiales	Clostridiaceae	Clostridium	Clostridium	ASV_ASV78	0.841417
1236685F1225694	16F_tarta	M	080-090	Elderly (71-100)	Botanical Garden	2022	Bacteria	Fibrobacterota	Fibrobacteria	Fibrobacterales	Fibrobacteraceae	CAIRAY01	CAIRAY01	ASV_ASV142	0.839479
1236688F1225697	19F_tarta	F	005-006	Juveniles (2-25)	Botanical Garden	2022	Bacteria	Bacteroidota	Bacteroidia	Bacteroidales	Bacteroidaceae	Prevotella	Prevotella	ASV_ASV825	0.838102
1236677F1225686	1N_tarta	Not determined	001-002	Juveniles (2-25)	Curieuse (Nursery)	17.02.2020	Bacteria	Bacillota	Bacilli	Bacillales	DSM-18226	Bacillus_BD	Bacillus_BD	ASV_ASV1145	0.837832
1236658F1225667	24C_tarta	F	030-040	Adults (26-70)	Curieuse	16.02.2020	Bacteria	Bacillota_A	Clostridia	Oscillospirales	Butyricicoccaceae	Butyricicoccus_A	Butyricicoccus_A	ASV_ASV147	0.837251
1236707F1225716	8BG_tarta	M	100 +	Centenarians (101+)	Botanical Garden	19.02.2020	Bacteria	Bacteroidota	Bacteroidia	Bacteroidales	UBA932			ASV_ASV183	0.836638
1236680F1225689	4N_tarta	Not determined	2	Juveniles (2-25)	Curieuse (Nursery)	17.02.2020	Bacteria	Bacteroidota	Bacteroidia	NS11-12g	UBA8524	SB11	SB11	ASV_ASV392	0.83632
1236675F1225684	n9_tarta	M	070-080	Elderly (71-100)	Curieuse	15.02.2020	Bacteria	Bacteroidota	Kapabacteria	Kapabacteriales				ASV_ASV33	0.835902
1236678F1225687	2N_tarta	Not determined	002-003	Juveniles (2-25)	Curieuse (Nursery)	17.02.2020	Bacteria	Bacillota_A	Clostridia	Lachnospirales	Lachnospiraceae			ASV_ASV28	0.835696
1236674F1225683	n8_tarta	Not determined	004-005	Juveniles (2-25)	Curieuse (Nursery)	14.02.2020	Bacteria	Bacillota	Bacilli					ASV_ASV79	0.834883
1236689F1225698	29F_tarta	Not determined	004-005	Juveniles (2-25)	Private Garden	2022	Bacteria	Bacillota_A	Clostridia	Clostridiales	Clostridiaceae	Clostridium	Clostridium	ASV_ASV20	0.834772
1236700F1225709	1BG_tarta	F	030-040	Adults (26-70)	Botanical Garden	19.02.2020	Bacteria	Bacillota_A	Clostridia	Clostridiales	Clostridiaceae	Clostridium	Clostridium	ASV_ASV8	0.831045
1236701F1225710	2BG_tarta	F	040-050	Adults (26-70)	Botanical Garden	19.02.2020	Bacteria	Pseudomonadota	Gammaproteobacteria	Enterobacterales_A	Succinivibrionaceae	Succinivibrio	Succinivibrio	ASV_ASV173	0.829565
1236673F1225682	n6_tarta	M	070-080	Elderly (71-100)	Curieuse	14.02.2020	Bacteria							ASV_ASV100	0.829389
1236707F1225716	8BG_tarta	M	100 +	Centenarians (101+)	Botanical Garden	19.02.2020	Bacteria	Bacteroidota	Bacteroidia	Bacteroidales	WCHB1-69	UBA5429	UBA5429	ASV_ASV21	0.828707
1236691F1225700	31F_tarta	Not determined	004-005	Juveniles (2-25)	Private Garden	2022	Bacteria	Bacillota_A	Clostridia	Lachnospirales	Cellulosilyticaceae	Cellulosilyticum	Cellulosilyticum	ASV_ASV75	0.827504
1236706F1225715	7BG_tarta	F	050-060	Adults (26-70)	Botanical Garden	19.02.2020	Bacteria	Bacteroidota	Bacteroidia	Bacteroidales	Rikenellaceae	Gallalistipes	Gallalistipes	ASV_ASV319	0.82734
1236686F1225695	17F_tarta	M	080-090	Elderly (71-100)	Botanical Garden	2022	Bacteria	Bacillota_A	Clostridia	Clostridiales	Clostridiaceae	Clostridium	Clostridium	ASV_ASV259	0.82728
1236699F1225708	31C_tarta	Not determined	004-005	Juveniles (2-25)	Curieuse (Nursery)	17.02.2020								ASV_ASV52	0.827206
1236689F1225698	29F_tarta	Not determined	004-005	Juveniles (2-25)	Private Garden	2022	Bacteria	Bacillota_A	Clostridia	Clostridiales	Clostridiaceae	Sarcina	Sarcina	ASV_ASV223	0.827042
1236675F1225684	n9_tarta	M	070-080	Elderly (71-100)	Curieuse	15.02.2020	Bacteria	Bacillota_A	Clostridia	Clostridiales	Clostridiaceae	Clostridium_AA	Clostridium_AA	ASV_ASV99	0.82701
1236666F1225675	27C_tarta	M	080-090	Elderly (71-100)	Curieuse	16.02.2020	Bacteria	Bacillota_A	Clostridia	Lachnospirales	Lachnospiraceae			ASV_ASV14	0.826655
1236670F1225679	4Na_tarta	Not determined	002-003	Juveniles (2-25)	Curieuse (Nursery)	17.02.2020	Bacteria	Bacillota_A	Clostridia	Lachnospirales	Lachnospiraceae			ASV_ASV25	0.826021
1236672F1225681	10BG_tarta	M	040-050	Adults (26-70)	Botanical Garden	19.02.2020								ASV_ASV196	0.825537
1236684F1225693	27_tarta	Not determined	001-002	Juveniles (2-25)	Curieuse (Nursery)	2022	Bacteria	Bacillota_A	Clostridia	Clostridiales	Clostridiaceae	Clostridium	Clostridium	ASV_ASV55	0.824794
1236707F1225716	8BG_tarta	M	100 +	Centenarians (101+)	Botanical Garden	19.02.2020	Bacteria	Bacillota_A	Clostridia	Peptostreptococcales	Anaerovoracaceae			ASV_ASV70	0.824742
1236683F1225692	26_tarta	Not determined	001-002	Juveniles (2-25)	Curieuse (Nursery)	2022	Bacteria	Bacillota_A	Clostridia	Lachnospirales				ASV_ASV281	0.823931
1236700F1225709	1BG_tarta	F	030-040	Adults (26-70)	Botanical Garden	19.02.2020	Bacteria	Bacillota_A	Clostridia	Oscillospirales	Acutalibacteraceae	Yeguia	Yeguia	ASV_ASV340	0.820345
1236658F1225667	24C_tarta	F	030-040	Adults (26-70)	Curieuse	16.02.2020	Bacteria	Bacillota_A	Clostridia	Lachnospirales	Lachnospiraceae			ASV_ASV14	0.819342
1236663F1225672	19N_tarta	Not determined	004-005	Juveniles (2-25)	Curieuse (Nursery)	15.02.2020	Bacteria	Bacteroidota	Bacteroidia	Bacteroidales	UBA932	Bact-08	Bact-08	ASV_ASV22	0.819335
1236698F1225707	22C_tarta	M	090-100	Elderly (71-100)	Curieuse	16.02.2020	Bacteria	Bacteroidota	Bacteroidia	Bacteroidales	Bacteroidaceae	Bacteroides_H	Bacteroides_H	ASV_ASV30	0.818905
1236709F1225718	BULBO_tarta	M	100 +	Centenarians (101+)	Parco Natura Viva	21.06.2021	Bacteria	Bacillota_A	Clostridia	Clostridiales	Clostridiaceae	Clostridium	Clostridium	ASV_ASV86	0.818578
1236692F1225701	7_tarta	F	015 -	Juveniles (2-25)	Parco Natura Viva	21.06.2021	Bacteria	Bacillota_A	Clostridia	Clostridiales	Clostridiaceae			ASV_ASV129	0.818545
1236675F1225684	n9_tarta	M	070-080	Elderly (71-100)	Curieuse	15.02.2020	Bacteria	Pseudomonadota	Gammaproteobacteria	Enterobacterales	Enterobacteriaceae	Escherichia	Escherichia	ASV_ASV171	0.818117
1236707F1225716	8BG_tarta	M	100 +	Centenarians (101+)	Botanical Garden	19.02.2020	Bacteria	Bacillota_A	Clostridia	Clostridiales	Clostridiaceae	Clostridium	Clostridium	ASV_ASV9	0.816812
1236682F1225691	25F_tarta	Not determined	005 -	Juveniles (2-25)	Curieuse (Nursery)	2022	Bacteria	Bacteroidota	Bacteroidia	Bacteroidales	Bacteroidaceae			ASV_ASV240	0.816761
1236678F1225687	2N_tarta	Not determined	002-003	Juveniles (2-25)	Curieuse (Nursery)	17.02.2020	Bacteria	Bacillota_A	Clostridia	Lachnospirales	Lachnospiraceae			ASV_ASV106	0.815799
1236690F1225699	30F_tarta	Not determined	004-005	Juveniles (2-25)	Private Garden	2022	Bacteria	Bacteroidota	Bacteroidia	Flavobacteriales	Crocinitomicaceae			ASV_ASV1738	0.815181
1236690F1225699	30F_tarta	Not determined	004-005	Juveniles (2-25)	Private Garden	2022	Bacteria	Bacillota_A	Clostridia	Lachnospirales	Lachnospiraceae			ASV_ASV28	0.815181
1236704F1225713	5BG_tarta	M	080-090	Elderly (71-100)	Botanical Garden	19.02.2020	Bacteria	Bacteroidota	Bacteroidia	Bacteroidales				ASV_ASV446	0.814615
1236683F1225692	26_tarta	Not determined	001-002	Juveniles (2-25)	Curieuse (Nursery)	2022	Bacteria	Verrucomicrobiota	Verrucomicrobiae	Verrucomicrobiales				ASV_ASV80	0.814034
1236669F1225678	17C_tarta	M	060-070	Adults (26-70)	Curieuse	15.02.2020	Bacteria	Bacteroidota	Bacteroidia	Bacteroidales	WCHB1-69	UBA5429	UBA5429	ASV_ASV18	0.813579
1236688F1225697	19F_tarta	F	005-006	Juveniles (2-25)	Botanical Garden	2022	Bacteria	Bacillota_A	Clostridia	Clostridiales	Clostridiaceae	Clostridium_J	Clostridium_J	ASV_ASV664	0.812258
1236682F1225691	25F_tarta	Not determined	005 -	Juveniles (2-25)	Curieuse (Nursery)	2022	Bacteria	Bacillota_A	Clostridia	Lachnospirales				ASV_ASV281	0.812027
1236665F1225674	23C_tarta	M	100 +	Centenarians (101+)	Curieuse	16.02.2020	Bacteria	Bacillota_A	Clostridia	Lachnospirales	Lachnospiraceae			ASV_ASV14	0.811863
1236661F1225670	9BG_tarta	M	090-100	Elderly (71-100)	Botanical Garden	18.02.2020								ASV_ASV34	0.811594
1236661F1225670	9BG_tarta	M	090-100	Elderly (71-100)	Botanical Garden	18.02.2020	Bacteria	Bacillota_A	Clostridia	Clostridiales	Clostridiaceae	Clostridium	Clostridium	ASV_ASV64	0.811594
1236683F1225692	26_tarta	Not determined	001-002	Juveniles (2-25)	Curieuse (Nursery)	2022	Bacteria	Bacillota_A	Clostridia	Clostridiales	Clostridiaceae			ASV_ASV11	0.81156
1236683F1225692	26_tarta	Not determined	001-002	Juveniles (2-25)	Curieuse (Nursery)	2022	Bacteria	Bacillota_A	Clostridia	Clostridiales	Clostridiaceae	Clostridium	Clostridium	ASV_ASV55	0.81156
1236672F1225681	10BG_tarta	M	040-050	Adults (26-70)	Botanical Garden	19.02.2020	Bacteria	Spirochaetota	Spirochaetia	Treponematales	UBA12059	SZUA-370	SZUA-370	ASV_ASV95	0.811054
1236685F1225694	16F_tarta	M	080-090	Elderly (71-100)	Botanical Garden	2022	Bacteria	Bacillota_A	Clostridia	Clostridiales	Clostridiaceae	Clostridium	Clostridium	ASV_ASV113	0.80992
1236683F1225692	26_tarta	Not determined	001-002	Juveniles (2-25)	Curieuse (Nursery)	2022	Bacteria	Bacteroidota	Bacteroidia	Bacteroidales	Bacteroidaceae	Bacteroides_H	Bacteroides_H	ASV_ASV30	0.809086
1236708F1225717	15C_tarta	M	080-090	Elderly (71-100)	Curieuse	15.02.2020	Bacteria							ASV_ASV73	0.807884
1236700F1225709	1BG_tarta	F	030-040	Adults (26-70)	Botanical Garden	19.02.2020	Bacteria	Bacillota_A	Clostridia	Lachnospirales	Lachnospiraceae			ASV_ASV2	0.806078
1236678F1225687	2N_tarta	Not determined	002-003	Juveniles (2-25)	Curieuse (Nursery)	17.02.2020	Bacteria	Verrucomicrobiota	Verrucomicrobiae	Verrucomicrobiales				ASV_ASV80	0.80585
1236705F1225714	6BG_tarta	M	040-050	Adults (26-70)	Botanical Garden	19.02.2020	Bacteria	Bacillota_A	Clostridia	Lachnospirales	Lachnospiraceae			ASV_ASV14	0.805605
1236692F1225701	7_tarta	F	015 -	Juveniles (2-25)	Parco Natura Viva	21.06.2021	Bacteria	Bacillota_A	Clostridia	Clostridiales	Clostridiaceae	Sarcina	Sarcina	ASV_ASV194	0.805126
1236675F1225684	n9_tarta	M	070-080	Elderly (71-100)	Curieuse	15.02.2020	Bacteria	Bacteroidota	Bacteroidia	Bacteroidales	WCHB1-69	UBA5429	UBA5429	ASV_ASV23	0.803296
1236671F1225680	ROGER_tarta	M	100 +	Centenarians (101+)	Parco Natura Viva	21.06.2021	Bacteria	Bacillota_A	Clostridia	Peptostreptococcales	Peptostreptococcaceae			ASV_ASV160	0.803186
1236700F1225709	1BG_tarta	F	030-040	Adults (26-70)	Botanical Garden	19.02.2020	Bacteria							ASV_ASV100	0.802511
1236700F1225709	1BG_tarta	F	030-040	Adults (26-70)	Botanical Garden	19.02.2020	Bacteria	Bacillota_A	Clostridia	Clostridiales	Clostridiaceae	Clostridium	Clostridium	ASV_ASV9	0.802511
1236658F1225667	24C_tarta	F	030-040	Adults (26-70)	Curieuse	16.02.2020	Bacteria	Bacillota_A	Clostridia	Christensenellales	CAG-138			ASV_ASV318	0.801433
1236659F1225668	28C_tarta	M	080-090	Elderly (71-100)	Curieuse	16.02.2020								ASV_ASV52	0.801343
1236684F1225693	27_tarta	Not determined	001-002	Juveniles (2-25)	Curieuse (Nursery)	2022	Bacteria							ASV_ASV24	0.7998
1236703F1225712	4BG_tarta	M	030-040	Adults (26-70)	Botanical Garden	19.02.2020	Bacteria	Bacillota_A	Clostridia	Lachnospirales	Lachnospiraceae			ASV_ASV344	0.799419
1236697F1225706	21C_tarta	M	080-090	Elderly (71-100)	Curieuse	16.02.2020	Bacteria	Bacillota_A	Clostridia	Clostridiales	Clostridiaceae	Clostridium	Clostridium	ASV_ASV9	0.798971
1236700F1225709	1BG_tarta	F	030-040	Adults (26-70)	Botanical Garden	19.02.2020	Bacteria	Bacillota_A	Clostridia	Clostridiales	Clostridiaceae			ASV_ASV101	0.798944
1236705F1225714	6BG_tarta	M	040-050	Adults (26-70)	Botanical Garden	19.02.2020	Bacteria	Bacillota_A	Clostridia	Peptostreptococcales	Peptostreptococcaceae			ASV_ASV98	0.798836
1236706F1225715	7BG_tarta	F	050-060	Adults (26-70)	Botanical Garden	19.02.2020	Bacteria	Bacillota_A	Clostridia	TANB77	CAG-508	Scatovivens	Scatovivens	ASV_ASV139	0.797163
1236706F1225715	7BG_tarta	F	050-060	Adults (26-70)	Botanical Garden	19.02.2020	Bacteria	Bacillota_A	Clostridia	Lachnospirales	Lachnospiraceae			ASV_ASV14	0.797163
1236703F1225712	4BG_tarta	M	030-040	Adults (26-70)	Botanical Garden	19.02.2020	Bacteria	Bacteroidota	Bacteroidia	Bacteroidales	WCHB1-69	UBA1205	UBA1205	ASV_ASV67	0.796996
1236683F1225692	26_tarta	Not determined	001-002	Juveniles (2-25)	Curieuse (Nursery)	2022	Bacteria	Bacteroidota	Kapabacteria	Kapabacteriales				ASV_ASV33	0.796714
1236659F1225668	28C_tarta	M	080-090	Elderly (71-100)	Curieuse	16.02.2020	Bacteria	Bacteroidota	Bacteroidia	Bacteroidales				ASV_ASV13	0.794967
1236684F1225693	27_tarta	Not determined	001-002	Juveniles (2-25)	Curieuse (Nursery)	2022	Bacteria	Bacillota_A	Clostridia	Clostridiales	Clostridiaceae			ASV_ASV11	0.794801
1236680F1225689	4N_tarta	Not determined	2	Juveniles (2-25)	Curieuse (Nursery)	17.02.2020	Bacteria	Bacillota	Bacilli	Bacillales	DSM-1321	Bacillus_AD	Bacillus_AD	ASV_ASV84	0.794504
1236683F1225692	26_tarta	Not determined	001-002	Juveniles (2-25)	Curieuse (Nursery)	2022	Bacteria	Bacillota_A	Clostridia	Lachnospirales	Lachnospiraceae			ASV_ASV333	0.79424
1236688F1225697	19F_tarta	F	005-006	Juveniles (2-25)	Botanical Garden	2022	Bacteria	Bacteroidota	Bacteroidia	Bacteroidales				ASV_ASV887	0.793797
1236672F1225681	10BG_tarta	M	040-050	Adults (26-70)	Botanical Garden	19.02.2020								ASV_ASV112	0.793674
1236695F1225704	11_tarta	F	015 -	Juveniles (2-25)	Parco Natura Viva	21.06.2021	Bacteria	Bacillota_A	Clostridia	Lachnospirales	Cellulosilyticaceae	Cellulosilyticum	Cellulosilyticum	ASV_ASV75	0.793433
1236670F1225679	4Na_tarta	Not determined	002-003	Juveniles (2-25)	Curieuse (Nursery)	17.02.2020	Bacteria	Bacillota	Bacilli	Bacillales	DSM-1321	Bacillus_AD	Bacillus_AD	ASV_ASV84	0.792443
1236665F1225674	23C_tarta	M	100 +	Centenarians (101+)	Curieuse	16.02.2020	Bacteria	Bacillota_A	Clostridia	Clostridiales	Clostridiaceae	Clostridium	Clostridium	ASV_ASV8	0.791002
1236689F1225698	29F_tarta	Not determined	004-005	Juveniles (2-25)	Private Garden	2022	GB_GCA_015063035.1~SUTG01000016.1 Archaea	Methanobacteriota	Methanobacteria	Methanobacteriales	Methanobacteriaceae	Methanobrevibacter	Methanobrevibacter olleyae_A [location=3458..4930] [ssu_len=1473] [contig_len=37473]	ASV_ASV631	0.790972
1236672F1225681	10BG_tarta	M	040-050	Adults (26-70)	Botanical Garden	19.02.2020	Bacteria	Bacteroidota	Bacteroidia	Bacteroidales	Bacteroidaceae	43-108	43-108	ASV_ASV53	0.790777
1236688F1225697	19F_tarta	F	005-006	Juveniles (2-25)	Botanical Garden	2022	Bacteria	Bacillota_A	Clostridia	Peptostreptococcales	Peptostreptococcaceae			ASV_ASV98	0.790105
1236703F1225712	4BG_tarta	M	030-040	Adults (26-70)	Botanical Garden	19.02.2020	Bacteria	Bacillota_A	Clostridia	Lachnospirales	Lachnospiraceae			ASV_ASV696	0.789729
1236683F1225692	26_tarta	Not determined	001-002	Juveniles (2-25)	Curieuse (Nursery)	2022								ASV_ASV359	0.786817
1236698F1225707	22C_tarta	M	090-100	Elderly (71-100)	Curieuse	16.02.2020	Bacteria	Bacillota_A	Clostridia	Clostridiales	Clostridiaceae	Clostridium	Clostridium	ASV_ASV8	0.78548
1236676F1225685	n10_tarta	M	090-100	Elderly (71-100)	Curieuse	15.02.2020	Bacteria	Bacillota_A	Clostridia	Clostridiales	Clostridiaceae	Clostridium_AA	Clostridium_AA	ASV_ASV61	0.785373
1236689F1225698	29F_tarta	Not determined	004-005	Juveniles (2-25)	Private Garden	2022	Bacteria	Bacillota_A	Clostridia	Lachnospirales	Lachnospiraceae			ASV_ASV332	0.783243
1236706F1225715	7BG_tarta	F	050-060	Adults (26-70)	Botanical Garden	19.02.2020	Bacteria	Bacteroidota	Bacteroidia	Bacteroidales	UBA932			ASV_ASV65	0.782075
1236683F1225692	26_tarta	Not determined	001-002	Juveniles (2-25)	Curieuse (Nursery)	2022	Bacteria	Bacillota	Bacilli	Bacillales	DSM-1321	Bacillus_AD	Bacillus_AD	ASV_ASV35	0.781869
1236697F1225706	21C_tarta	M	080-090	Elderly (71-100)	Curieuse	16.02.2020	Bacteria	Bacillota_A	Clostridia	Peptostreptococcales	Peptostreptococcaceae	Terrisporobacter	Terrisporobacter	ASV_ASV10	0.780604
1236695F1225704	11_tarta	F	015 -	Juveniles (2-25)	Parco Natura Viva	21.06.2021	Bacteria	Bacteroidota	Bacteroidia	Bacteroidales	UBA932	Bact-08	Bact-08	ASV_ASV22	0.779685
1236672F1225681	10BG_tarta	M	040-050	Adults (26-70)	Botanical Garden	19.02.2020	Bacteria	Bacillota_A	Clostridia	Lachnospirales	Lachnospiraceae			ASV_ASV131	0.779191
1236698F1225707	22C_tarta	M	090-100	Elderly (71-100)	Curieuse	16.02.2020	Bacteria	Verrucomicrobiota	Verrucomicrobiae	Pedosphaerales	UBA1412	UBA1412	UBA1412	ASV_ASV133	0.778795
1236691F1225700	31F_tarta	Not determined	004-005	Juveniles (2-25)	Private Garden	2022	Bacteria	Bacillota_A	Clostridia	Clostridiales	Clostridiaceae	Clostridium	Clostridium	ASV_ASV92	0.778451
1236697F1225706	21C_tarta	M	080-090	Elderly (71-100)	Curieuse	16.02.2020	Bacteria	Bacillota_A	Clostridia					ASV_ASV707	0.777543
1236675F1225684	n9_tarta	M	070-080	Elderly (71-100)	Curieuse	15.02.2020								ASV_ASV82	0.776618
1236680F1225689	4N_tarta	Not determined	2	Juveniles (2-25)	Curieuse (Nursery)	17.02.2020	Bacteria	Bacillota	Bacilli	Bacillales	DSM-1321	Bacillus_AD	Bacillus_AD	ASV_ASV71	0.776583
1236693F1225702	8_tarta	F	100 +	Centenarians (101+)	Parco Natura Viva	21.06.2021	Bacteria	Bacteroidota	Bacteroidia	Bacteroidales	WCHB1-69	UBA5429	UBA5429	ASV_ASV21	0.776251
1236681F1225690	24F_tarta	M	030-040	Adults (26-70)	Curieuse	2022	Bacteria	Bacteroidota	Bacteroidia	Bacteroidales	UBA932	Bact-08	Bact-08	ASV_ASV22	0.775523
1236667F1225676	29C_tarta	M	100 +	Centenarians (101+)	Curieuse	17.02.2020	Bacteria	Spirochaetota	Spirochaetia	Treponematales	Treponemataceae			ASV_ASV204	0.775511
1236690F1225699	30F_tarta	Not determined	004-005	Juveniles (2-25)	Private Garden	2022	Bacteria	Bacillota	Bacilli	Bacillales	DSM-1321	Bacillus_AD	Bacillus_AD	ASV_ASV622	0.77509
1236684F1225693	27_tarta	Not determined	001-002	Juveniles (2-25)	Curieuse (Nursery)	2022	Bacteria	Bacillota_A	Clostridia	Lachnospirales	Lachnospiraceae			ASV_ASV333	0.774806
1236702F1225711	3BG_tarta	F	030-040	Adults (26-70)	Botanical Garden	19.02.2020	Bacteria	Bacteroidota	Bacteroidia	Bacteroidales	WCHB1-69	UBA5429	UBA5429	ASV_ASV23	0.774572
1236657F1225666	�	F	030-040	Adults (26-70)	Curieuse	14.02.2020								ASV_ASV107	0.774542
1236661F1225670	9BG_tarta	M	090-100	Elderly (71-100)	Botanical Garden	18.02.2020	Bacteria	Fibrobacterota	Fibrobacteria	Fibrobacterales	Fibrobacteraceae	CAIRAY01	CAIRAY01	ASV_ASV142	0.774084
1236687F1225696	18F_tarta	F	040-050	Adults (26-70)	Botanical Garden	2022	Bacteria	Bacillota_A	Clostridia	Clostridiales	Clostridiaceae	Clostridium	Clostridium	ASV_ASV103	0.773687
1236709F1225718	BULBO_tarta	M	100 +	Centenarians (101+)	Parco Natura Viva	21.06.2021	Bacteria	Bacillota_A	Clostridia	Clostridiales	Clostridiaceae	Clostridium	Clostridium	ASV_ASV111	0.772134
1236688F1225697	19F_tarta	F	005-006	Juveniles (2-25)	Botanical Garden	2022	Bacteria	Bacillota_A	Clostridia	Clostridiales	Clostridiaceae	Clostridium_J	Clostridium_J	ASV_ASV738	0.771645
1236686F1225695	17F_tarta	M	080-090	Elderly (71-100)	Botanical Garden	2022	Bacteria	Bacillota_A	Clostridia	Lachnospirales	Lachnospiraceae			ASV_ASV121	0.77011
1236704F1225713	5BG_tarta	M	080-090	Elderly (71-100)	Botanical Garden	19.02.2020	Bacteria	Bacillota_A	Clostridia	Lachnospirales	Lachnospiraceae	Velocimicrobium	Velocimicrobium	ASV_ASV116	0.768823
1236693F1225702	8_tarta	F	100 +	Centenarians (101+)	Parco Natura Viva	21.06.2021	Bacteria	Bacillota_A	Clostridia	Clostridiales	Clostridiaceae	Clostridium	Clostridium	ASV_ASV111	0.768677
1236660F1225669	30C_tarta	M	090-100	Elderly (71-100)	Curieuse	17.02.2020	Bacteria	Bacteroidota	Bacteroidia	Bacteroidales	UBA932			ASV_ASV37	0.768156
1236659F1225668	28C_tarta	M	080-090	Elderly (71-100)	Curieuse	16.02.2020	Bacteria	Bacillota_A	Clostridia	Lachnospirales	Lachnospiraceae			ASV_ASV14	0.767334
1236700F1225709	1BG_tarta	F	030-040	Adults (26-70)	Botanical Garden	19.02.2020	Bacteria	Bacillota_A	Clostridia	TANB77	CAG-508	Scatovivens	Scatovivens	ASV_ASV139	0.766844
1236665F1225674	23C_tarta	M	100 +	Centenarians (101+)	Curieuse	16.02.2020	Bacteria	Bacillota_A	Clostridia	Lachnospirales	Lachnospiraceae			ASV_ASV25	0.766663
1236658F1225667	24C_tarta	F	030-040	Adults (26-70)	Curieuse	16.02.2020	Bacteria	Bacteroidota	Bacteroidia	Bacteroidales	WCHB1-69	UBA5429	UBA5429	ASV_ASV18	0.765615
1236703F1225712	4BG_tarta	M	030-040	Adults (26-70)	Botanical Garden	19.02.2020	Bacteria							ASV_ASV100	0.765504
1236677F1225686	1N_tarta	Not determined	001-002	Juveniles (2-25)	Curieuse (Nursery)	17.02.2020	Bacteria	Bacillota	Bacilli	Bacillales	Planococcaceae	Ureibacillus	Ureibacillus	ASV_ASV1210	0.764732
1236677F1225686	1N_tarta	Not determined	001-002	Juveniles (2-25)	Curieuse (Nursery)	17.02.2020	Bacteria	Bacteroidota	Bacteroidia	Bacteroidales				ASV_ASV7	0.764732
1236668F1225677	22F_tarta	M	080-090	Elderly (71-100)	Curieuse	2022	Bacteria	Spirochaetota	Spirochaetia	Treponematales	Treponemataceae			ASV_ASV135	0.76409
1236702F1225711	3BG_tarta	F	030-040	Adults (26-70)	Botanical Garden	19.02.2020	Bacteria	Bacteroidota	Bacteroidia	Bacteroidales				ASV_ASV46	0.764019
1236663F1225672	19N_tarta	Not determined	004-005	Juveniles (2-25)	Curieuse (Nursery)	15.02.2020	Bacteria	Bacillota_A	Clostridia	Peptostreptococcales	Peptostreptococcaceae	Terrisporobacter	Terrisporobacter	ASV_ASV10	0.762829
1236663F1225672	19N_tarta	Not determined	004-005	Juveniles (2-25)	Curieuse (Nursery)	15.02.2020	Bacteria	Chloroflexota	Anaerolineae	Anaerolineales	Anaerolineaceae	Flexilinea	Flexilinea	ASV_ASV186	0.762829
1236670F1225679	4Na_tarta	Not determined	002-003	Juveniles (2-25)	Curieuse (Nursery)	17.02.2020	Bacteria	Bacillota	Bacilli	Bacillales	DSM-1321	Bacillus_AD	Bacillus_AD	ASV_ASV35	0.761103
1236678F1225687	2N_tarta	Not determined	002-003	Juveniles (2-25)	Curieuse (Nursery)	17.02.2020	Bacteria	Bacillota_A	Clostridia	Lachnospirales	Lachnospiraceae			ASV_ASV645	0.76108
1236709F1225718	BULBO_tarta	M	100 +	Centenarians (101+)	Parco Natura Viva	21.06.2021								ASV_ASV34	0.760522
1236676F1225685	n10_tarta	M	090-100	Elderly (71-100)	Curieuse	15.02.2020	Bacteria	Bacteroidota	Bacteroidia	Bacteroidales				ASV_ASV12	0.760241
1236706F1225715	7BG_tarta	F	050-060	Adults (26-70)	Botanical Garden	19.02.2020	Bacteria	Bacteroidota	Kapabacteria	Kapabacteriales				ASV_ASV33	0.759443
1236697F1225706	21C_tarta	M	080-090	Elderly (71-100)	Curieuse	16.02.2020	Bacteria	Bacteroidota	Bacteroidia	Bacteroidales	Bacteroidaceae	Bacteroides_H	Bacteroides_H	ASV_ASV30	0.759176
1236701F1225710	2BG_tarta	F	040-050	Adults (26-70)	Botanical Garden	19.02.2020	Bacteria	Bacteroidota	Bacteroidia	Bacteroidales	Bacteroidaceae			ASV_ASV119	0.757689
1236689F1225698	29F_tarta	Not determined	004-005	Juveniles (2-25)	Private Garden	2022	Bacteria	Bacillota_A	Clostridia	Lachnospirales	Lachnospiraceae			ASV_ASV45	0.757478
1236685F1225694	16F_tarta	M	080-090	Elderly (71-100)	Botanical Garden	2022	Bacteria	Bacteroidota	Kapabacteria	Kapabacteriales				ASV_ASV33	0.756714
1236700F1225709	1BG_tarta	F	030-040	Adults (26-70)	Botanical Garden	19.02.2020	Bacteria	Bacillota_A	Clostridia	Clostridiales	Clostridiaceae	Clostridium	Clostridium	ASV_ASV55	0.756144
1236703F1225712	4BG_tarta	M	030-040	Adults (26-70)	Botanical Garden	19.02.2020	Bacteria	Spirochaetota	Spirochaetia	Treponematales	Treponemataceae	Treponema_D	Treponema_D	ASV_ASV191	0.755814
1236703F1225712	4BG_tarta	M	030-040	Adults (26-70)	Botanical Garden	19.02.2020	Bacteria	Bacillota_A	Clostridia	Lachnospirales	Lachnospiraceae			ASV_ASV57	0.755814
1236702F1225711	3BG_tarta	F	030-040	Adults (26-70)	Botanical Garden	19.02.2020	Bacteria	Fibrobacterota	Chitinivibrionia	Chitinivibrionales	Chitinispirillaceae	JAAYPC01	JAAYPC01	ASV_ASV39	0.755577
1236666F1225675	27C_tarta	M	080-090	Elderly (71-100)	Curieuse	16.02.2020	Bacteria	Bacillota	Bacilli	Bacillales	DSM-1321	Bacillus_AD	Bacillus_AD	ASV_ASV165	0.754856
1236706F1225715	7BG_tarta	F	050-060	Adults (26-70)	Botanical Garden	19.02.2020								ASV_ASV112	0.754413
1236672F1225681	10BG_tarta	M	040-050	Adults (26-70)	Botanical Garden	19.02.2020	Bacteria	Bacteroidota	Kapabacteria	Kapabacteriales				ASV_ASV33	0.753121
1236684F1225693	27_tarta	Not determined	001-002	Juveniles (2-25)	Curieuse (Nursery)	2022	Bacteria	Bacillota_A	Clostridia	Lachnospirales	Lachnospiraceae			ASV_ASV246	0.749813
1236689F1225698	29F_tarta	Not determined	004-005	Juveniles (2-25)	Private Garden	2022	Bacteria	Bacillota_A	Clostridia	Clostridiales	Clostridiaceae	Clostridium	Clostridium	ASV_ASV8	0.749749
1236670F1225679	4Na_tarta	Not determined	002-003	Juveniles (2-25)	Curieuse (Nursery)	17.02.2020	Bacteria	Bacteroidota	Bacteroidia	Flavobacteriales	Crocinitomicaceae	Taishania	Taishania	ASV_ASV557	0.747672
1236689F1225698	29F_tarta	Not determined	004-005	Juveniles (2-25)	Private Garden	2022	Bacteria	Bacteroidota	Bacteroidia	Bacteroidales				ASV_ASV72	0.747172
1236661F1225670	9BG_tarta	M	090-100	Elderly (71-100)	Botanical Garden	18.02.2020	Bacteria	Bacillota_A	Clostridia	Lachnospirales	Lachnospiraceae	Velocimicrobium	Velocimicrobium	ASV_ASV116	0.746803
1236703F1225712	4BG_tarta	M	030-040	Adults (26-70)	Botanical Garden	19.02.2020	Bacteria	Bacillota_A	Clostridia	Clostridiales	Clostridiaceae	Clostridium	Clostridium	ASV_ASV55	0.746124
1236693F1225702	8_tarta	F	100 +	Centenarians (101+)	Parco Natura Viva	21.06.2021	Bacteria	Bacillota_A	Clostridia	Clostridiales	Clostridiaceae			ASV_ASV129	0.745958
1236681F1225690	24F_tarta	M	030-040	Adults (26-70)	Curieuse	2022	Bacteria	Bacillota_A	Clostridia	Peptostreptococcales	Anaerovoracaceae			ASV_ASV70	0.745503
1236702F1225711	3BG_tarta	F	030-040	Adults (26-70)	Botanical Garden	19.02.2020	Bacteria	Bacillota_A	Clostridia	Lachnospirales	Lachnospiraceae			ASV_ASV131	0.745024
1236697F1225706	21C_tarta	M	080-090	Elderly (71-100)	Curieuse	16.02.2020								ASV_ASV124	0.74387
1236686F1225695	17F_tarta	M	080-090	Elderly (71-100)	Botanical Garden	2022	Bacteria	Bacteroidota	Bacteroidia	Bacteroidales	WCHB1-69	RUG11690	RUG11690	ASV_ASV287	0.743207
1236689F1225698	29F_tarta	Not determined	004-005	Juveniles (2-25)	Private Garden	2022	Bacteria	Bacillota_A	Clostridia	Clostridiales	Clostridiaceae	Clostridium	Clostridium	ASV_ASV42	0.742019
1236705F1225714	6BG_tarta	M	040-050	Adults (26-70)	Botanical Garden	19.02.2020	Bacteria	Bacillota_A	Clostridia	Lachnospirales	Lachnospiraceae	Velocimicrobium	Velocimicrobium	ASV_ASV40	0.741292
1236682F1225691	25F_tarta	Not determined	005 -	Juveniles (2-25)	Curieuse (Nursery)	2022	Bacteria	Bacillota_A	Clostridia	Lachnospirales	Lachnospiraceae			ASV_ASV69	0.741004
1236684F1225693	27_tarta	Not determined	001-002	Juveniles (2-25)	Curieuse (Nursery)	2022	Bacteria	Bacillota_A	Clostridia	Lachnospirales	Lachnospiraceae			ASV_ASV66	0.739815
1236666F1225675	27C_tarta	M	080-090	Elderly (71-100)	Curieuse	16.02.2020	Bacteria	Bacillota	Bacilli	Bacillales	DSM-1321	Peribacillus	Peribacillus	ASV_ASV341	0.739332
1236658F1225667	24C_tarta	F	030-040	Adults (26-70)	Curieuse	16.02.2020	Bacteria	Bacteroidota	Kapabacteria	Kapabacteriales				ASV_ASV33	0.738751
1236698F1225707	22C_tarta	M	090-100	Elderly (71-100)	Curieuse	16.02.2020	Bacteria	Bacillota_A	Clostridia	Oscillospirales	Ruminococcaceae	HUN007	HUN007	ASV_ASV43	0.738686
1236691F1225700	31F_tarta	Not determined	004-005	Juveniles (2-25)	Private Garden	2022	Bacteria	Pseudomonadota	Alphaproteobacteria	Caulobacterales	Caulobacteraceae	Brevundimonas	Brevundimonas	ASV_ASV470	0.737929
1236666F1225675	27C_tarta	M	080-090	Elderly (71-100)	Curieuse	16.02.2020	Bacteria	Bacteroidota	Bacteroidia	Bacteroidales	UBA932			ASV_ASV37	0.737392
1236667F1225676	29C_tarta	M	100 +	Centenarians (101+)	Curieuse	17.02.2020	Bacteria	Bacteroidota	Bacteroidia	Bacteroidales	WCHB1-69	UBA5429	UBA5429	ASV_ASV18	0.736736
1236672F1225681	10BG_tarta	M	040-050	Adults (26-70)	Botanical Garden	19.02.2020								ASV_ASV34	0.735741
1236690F1225699	30F_tarta	Not determined	004-005	Juveniles (2-25)	Private Garden	2022	Bacteria	Bacillota_A	Clostridia	Lachnospirales	Lachnospiraceae			ASV_ASV122	0.734999
1236700F1225709	1BG_tarta	F	030-040	Adults (26-70)	Botanical Garden	19.02.2020	Bacteria	Bacteroidota	Bacteroidia	Bacteroidales	WCHB1-69	UBA5429	UBA5429	ASV_ASV23	0.734743
1236663F1225672	19N_tarta	Not determined	004-005	Juveniles (2-25)	Curieuse (Nursery)	15.02.2020	Bacteria	Bacteroidota	Bacteroidia	Bacteroidales				ASV_ASV7	0.734576
1236659F1225668	28C_tarta	M	080-090	Elderly (71-100)	Curieuse	16.02.2020	Bacteria	Riflebacteria	Ozemobacteria	Ozemobacterales	Ozemobacteraceae	Rifleibacterium	Rifleibacterium	ASV_ASV102	0.733325
1236673F1225682	n6_tarta	M	070-080	Elderly (71-100)	Curieuse	14.02.2020	Bacteria	Bacillota_A	Clostridia	TANB77	CAG-508	UMGS1864	UMGS1864	ASV_ASV435	0.73229
1236673F1225682	n6_tarta	M	070-080	Elderly (71-100)	Curieuse	14.02.2020	Bacteria	Bacteroidota	Bacteroidia	Bacteroidales	UBA932			ASV_ASV65	0.73229
1236668F1225677	22F_tarta	M	080-090	Elderly (71-100)	Curieuse	2022	Bacteria	Bacillota	Bacilli	Bacillales	DSM-1321	Pradoshia	Pradoshia	ASV_ASV144	0.732142
1236706F1225715	7BG_tarta	F	050-060	Adults (26-70)	Botanical Garden	19.02.2020	Bacteria	Bacteroidota	Bacteroidia	Bacteroidales	WCHB1-69	UBA5429	UBA5429	ASV_ASV18	0.731781
1236679F1225688	3N_tarta	Not determined	002-003	Juveniles (2-25)	Curieuse (Nursery)	17.02.2020	Bacteria	Bacteroidota	Bacteroidia	Bacteroidales	UBA932	Coprenecus	Coprenecus	ASV_ASV3	0.731492
1236695F1225704	11_tarta	F	015 -	Juveniles (2-25)	Parco Natura Viva	21.06.2021								ASV_ASV34	0.730586
1236704F1225713	5BG_tarta	M	080-090	Elderly (71-100)	Botanical Garden	19.02.2020	Bacteria	Bacillota_A	Clostridia	Lachnospirales	Lachnospiraceae			ASV_ASV88	0.730261
1236661F1225670	9BG_tarta	M	090-100	Elderly (71-100)	Botanical Garden	18.02.2020								ASV_ASV196	0.729753
1236675F1225684	n9_tarta	M	070-080	Elderly (71-100)	Curieuse	15.02.2020	Bacteria	Bacillota_A	Clostridia	Lachnospirales	Lachnospiraceae			ASV_ASV2	0.729191
1236695F1225704	11_tarta	F	015 -	Juveniles (2-25)	Parco Natura Viva	21.06.2021	Bacteria	Bacillota_A	Clostridia	Lachnospirales	Lachnospiraceae			ASV_ASV123	0.728622
1236705F1225714	6BG_tarta	M	040-050	Adults (26-70)	Botanical Garden	19.02.2020	Bacteria	Bacillota_A	Clostridia	Peptostreptococcales	Peptostreptococcaceae	Terrisporobacter	Terrisporobacter	ASV_ASV10	0.727753
1236670F1225679	4Na_tarta	Not determined	002-003	Juveniles (2-25)	Curieuse (Nursery)	17.02.2020	Bacteria	Pseudomonadota	Gammaproteobacteria	Pseudomonadales	Pseudomonadaceae			ASV_ASV522	0.727525
1236683F1225692	26_tarta	Not determined	001-002	Juveniles (2-25)	Curieuse (Nursery)	2022	Bacteria							ASV_ASV226	0.727435
1236688F1225697	19F_tarta	F	005-006	Juveniles (2-25)	Botanical Garden	2022	Bacteria	Bacillota_A	Clostridia	Oscillospirales	Ethanoligenenaceae	Ruminiclostridium_D	Ruminiclostridium_D	ASV_ASV971	0.72734
1236669F1225678	17C_tarta	M	060-070	Adults (26-70)	Curieuse	15.02.2020	Bacteria	Bacteroidota	Bacteroidia	Bacteroidales	Bacteroidaceae	Bacteroides_H	Bacteroides_H	ASV_ASV30	0.727086
1236685F1225694	16F_tarta	M	080-090	Elderly (71-100)	Botanical Garden	2022	Bacteria	Fibrobacterota	Chitinivibrionia	Chitinivibrionales	Chitinispirillaceae	JAAYPC01	JAAYPC01	ASV_ASV39	0.725677
1236700F1225709	1BG_tarta	F	030-040	Adults (26-70)	Botanical Garden	19.02.2020	Bacteria	Spirochaetota	Spirochaetia					ASV_ASV59	0.724043
1236700F1225709	1BG_tarta	F	030-040	Adults (26-70)	Botanical Garden	19.02.2020	Bacteria	Bacteroidota	Bacteroidia	Bacteroidales	WCHB1-69	UBA1205	UBA1205	ASV_ASV67	0.724043
1236670F1225679	4Na_tarta	Not determined	002-003	Juveniles (2-25)	Curieuse (Nursery)	17.02.2020	Bacteria	Bacteroidota	Bacteroidia	Flavobacteriales	Weeksellaceae	Planobacterium	Planobacterium	ASV_ASV526	0.723048
1236686F1225695	17F_tarta	M	080-090	Elderly (71-100)	Botanical Garden	2022	Bacteria	Bacillota_A	Clostridia	Clostridiales	Clostridiaceae	Clostridium	Clostridium	ASV_ASV113	0.723029
1236664F1225673	12GH_tarta (=20C)	F	040-050	Adults (26-70)	Curieuse	15.02.2020	Bacteria	Bacillota_A	Clostridia	Oscillospirales	Oscillospiraceae			ASV_ASV430	0.72283
1236697F1225706	21C_tarta	M	080-090	Elderly (71-100)	Curieuse	16.02.2020	Bacteria	Fibrobacterota	Fibrobacteria	Fibrobacterales	Fibrobacteraceae			ASV_ASV138	0.722442
1236682F1225691	25F_tarta	Not determined	005 -	Juveniles (2-25)	Curieuse (Nursery)	2022	Bacteria	Bacillota_A	Clostridia	Lachnospirales	Lachnospiraceae			ASV_ASV110	0.722064
1236703F1225712	4BG_tarta	M	030-040	Adults (26-70)	Botanical Garden	19.02.2020	Bacteria	Bacillota_A	Clostridia	Clostridiales	Clostridiaceae			ASV_ASV101	0.721899
1236668F1225677	22F_tarta	M	080-090	Elderly (71-100)	Curieuse	2022	Bacteria	Bacillota_A	Clostridia	Lachnospirales	Lachnospiraceae			ASV_ASV17	0.721493
1236700F1225709	1BG_tarta	F	030-040	Adults (26-70)	Botanical Garden	19.02.2020	Bacteria	Riflebacteria	Ozemobacteria	Ozemobacterales	Ozemobacteraceae	Rifleibacterium	Rifleibacterium	ASV_ASV102	0.720477
1236666F1225675	27C_tarta	M	080-090	Elderly (71-100)	Curieuse	16.02.2020	Bacteria	Bacillota_A	Clostridia	Lachnospirales	Lachnospiraceae			ASV_ASV17	0.719927
1236666F1225675	27C_tarta	M	080-090	Elderly (71-100)	Curieuse	16.02.2020	Bacteria	Bacteroidota	Bacteroidia	Bacteroidales				ASV_ASV4	0.719927
1236709F1225718	BULBO_tarta	M	100 +	Centenarians (101+)	Parco Natura Viva	21.06.2021	Bacteria	Bacillota	Bacilli	Bacillales	DSM-1321	Bacillus_AD	Bacillus_AD	ASV_ASV35	0.719884
1236693F1225702	8_tarta	F	100 +	Centenarians (101+)	Parco Natura Viva	21.06.2021	Bacteria	Bacteroidota	Bacteroidia	Bacteroidales	UBA932	Bact-08	Bact-08	ASV_ASV5	0.719452
1236673F1225682	n6_tarta	M	070-080	Elderly (71-100)	Curieuse	14.02.2020	Bacteria	Verrucomicrobiota	Verrucomicrobiae	Verrucomicrobiales				ASV_ASV80	0.716106
1236673F1225682	n6_tarta	M	070-080	Elderly (71-100)	Curieuse	14.02.2020	Bacteria	Bacillota_A	Clostridia	Oscillospirales	Oscillospiraceae			ASV_ASV913	0.716106
1236666F1225675	27C_tarta	M	080-090	Elderly (71-100)	Curieuse	16.02.2020	Bacteria	Bacillota_A	Clostridia	Lachnospirales	Lachnospiraceae			ASV_ASV265	0.716046
1236681F1225690	24F_tarta	M	030-040	Adults (26-70)	Curieuse	2022	Bacteria	Bacillota	Bacilli	Bacillales	DSM-1321	Bacillus_AD	Bacillus_AD	ASV_ASV35	0.715483
1236706F1225715	7BG_tarta	F	050-060	Adults (26-70)	Botanical Garden	19.02.2020	Bacteria	Bacteroidota	Bacteroidia	Bacteroidales	UBA932			ASV_ASV56	0.714178
1236657F1225666	�	F	030-040	Adults (26-70)	Curieuse	14.02.2020	RS_GCF_001729965.1~NZ_JRWK01000030.1 Archaea	Methanobacteriota	Methanobacteria	Methanobacteriales	Methanobacteriaceae	Methanosphaera	Methanosphaera sp001729965 [location=1..1480] [ssu_len=1480] [contig_len=1498]	ASV_ASV41	0.714154
1236707F1225716	8BG_tarta	M	100 +	Centenarians (101+)	Botanical Garden	19.02.2020	Bacteria	Bacillota_A	Clostridia	Lachnospirales	Lachnospiraceae			ASV_ASV527	0.713719
1236669F1225678	17C_tarta	M	060-070	Adults (26-70)	Curieuse	15.02.2020	Bacteria	Bacteroidota	Bacteroidia	Bacteroidales	WCHB1-69	UBA5429	UBA5429	ASV_ASV21	0.713571
1236668F1225677	22F_tarta	M	080-090	Elderly (71-100)	Curieuse	2022	Bacteria	Bacteroidota	Kapabacteria	Kapabacteriales				ASV_ASV33	0.713506
1236688F1225697	19F_tarta	F	005-006	Juveniles (2-25)	Botanical Garden	2022	Bacteria	Bacillota_A	Clostridia	Lachnospirales	Lachnospiraceae			ASV_ASV121	0.712572
1236673F1225682	n6_tarta	M	070-080	Elderly (71-100)	Curieuse	14.02.2020	Bacteria	Pseudomonadota	Gammaproteobacteria	Enterobacterales	Enterobacteriaceae	Escherichia	Escherichia	ASV_ASV171	0.712061
1236698F1225707	22C_tarta	M	090-100	Elderly (71-100)	Curieuse	16.02.2020	Bacteria	Bacteroidota	Bacteroidia	Bacteroidales	Bacteroidaceae			ASV_ASV224	0.711946
1236684F1225693	27_tarta	Not determined	001-002	Juveniles (2-25)	Curieuse (Nursery)	2022	Bacteria	Bacillota_A	Clostridia	Lachnospirales				ASV_ASV281	0.709823
1236707F1225716	8BG_tarta	M	100 +	Centenarians (101+)	Botanical Garden	19.02.2020	Bacteria	Bacteroidota	Bacteroidia	Bacteroidales	Bacteroidaceae			ASV_ASV224	0.709754
1236664F1225673	12GH_tarta (=20C)	F	040-050	Adults (26-70)	Curieuse	15.02.2020	Bacteria	Bacteroidota	Bacteroidia	Bacteroidales	UBA932	Bact-08	Bact-08	ASV_ASV5	0.708974
1236657F1225666	�	F	030-040	Adults (26-70)	Curieuse	14.02.2020	Bacteria	Bacteroidota	Bacteroidia	Bacteroidales	Bacteroidaceae	Bacteroides_H	Bacteroides_H	ASV_ASV30	0.708903
1236690F1225699	30F_tarta	Not determined	004-005	Juveniles (2-25)	Private Garden	2022	Bacteria	Pseudomonadota	Gammaproteobacteria	Burkholderiales	Burkholderiaceae_B	Comamonas	Comamonas	ASV_ASV161	0.708272
1236660F1225669	30C_tarta	M	090-100	Elderly (71-100)	Curieuse	17.02.2020	Bacteria	Spirochaetota	Spirochaetia	Treponematales	Treponemataceae	Treponema_C	Treponema_C	ASV_ASV15	0.707635
1236660F1225669	30C_tarta	M	090-100	Elderly (71-100)	Curieuse	17.02.2020	Bacteria	Bacillota_A	Clostridia	Lachnospirales	Lachnospiraceae	Anaerocolumna	Anaerocolumna	ASV_ASV182	0.707635
1236705F1225714	6BG_tarta	M	040-050	Adults (26-70)	Botanical Garden	19.02.2020	Bacteria	Bacillota_A	Clostridia	Lachnospirales	Lachnospiraceae			ASV_ASV170	0.707443
1236666F1225675	27C_tarta	M	080-090	Elderly (71-100)	Curieuse	16.02.2020	Bacteria	Bacteroidota	Bacteroidia	Bacteroidales	Paludibacteraceae			ASV_ASV233	0.706344
1236686F1225695	17F_tarta	M	080-090	Elderly (71-100)	Botanical Garden	2022	Bacteria	Bacillota_A	Clostridia	Clostridiales	Caloramatoraceae			ASV_ASV942	0.706215
1236688F1225697	19F_tarta	F	005-006	Juveniles (2-25)	Botanical Garden	2022	Bacteria	Bacillota_A	Clostridia	Lachnospirales	Lachnospiraceae			ASV_ASV66	0.705187
1236684F1225693	27_tarta	Not determined	001-002	Juveniles (2-25)	Curieuse (Nursery)	2022								ASV_ASV51	0.704824
1236699F1225708	31C_tarta	Not determined	004-005	Juveniles (2-25)	Curieuse (Nursery)	17.02.2020	Bacteria	Bacillota_A	Clostridia	Clostridiales	Clostridiaceae	Clostridium	Clostridium	ASV_ASV282	0.704657
1236708F1225717	15C_tarta	M	080-090	Elderly (71-100)	Curieuse	15.02.2020	Bacteria	Bacillota_A	Clostridia	Lachnospirales	Lachnospiraceae			ASV_ASV25	0.704459
1236667F1225676	29C_tarta	M	100 +	Centenarians (101+)	Curieuse	17.02.2020	Bacteria	Bacteroidota	Bacteroidia	Bacteroidales	WCHB1-69	UBA5429	UBA5429	ASV_ASV21	0.704423
1236664F1225673	12GH_tarta (=20C)	F	040-050	Adults (26-70)	Curieuse	15.02.2020	Bacteria	Bacillota	Bacilli					ASV_ASV370	0.704355
1236705F1225714	6BG_tarta	M	040-050	Adults (26-70)	Botanical Garden	19.02.2020	Bacteria	Bacillota_A	Clostridia	Clostridiales	Clostridiaceae			ASV_ASV101	0.704058
1236673F1225682	n6_tarta	M	070-080	Elderly (71-100)	Curieuse	14.02.2020	Bacteria	Bacillota_A	Clostridia	Peptostreptococcales	Peptostreptococcaceae			ASV_ASV58	0.703969
1236674F1225683	n8_tarta	Not determined	004-005	Juveniles (2-25)	Curieuse (Nursery)	14.02.2020	Bacteria	Bacillota_G	UBA4882	UBA8346	UBA8346	Hydrogenispora	Hydrogenispora	ASV_ASV201	0.702625
1236659F1225668	28C_tarta	M	080-090	Elderly (71-100)	Curieuse	16.02.2020	Bacteria	Bacillota	Bacilli	Bacillales	DSM-1321	Bacillus_AD	Bacillus_AD	ASV_ASV29	0.701441
1236679F1225688	3N_tarta	Not determined	002-003	Juveniles (2-25)	Curieuse (Nursery)	17.02.2020	Bacteria	Bacillota_A	Clostridia	Lachnospirales	Lachnospiraceae	Pararoseburia	Pararoseburia	ASV_ASV1020	0.700854
1236668F1225677	22F_tarta	M	080-090	Elderly (71-100)	Curieuse	2022	Bacteria	Bacillota_A	Clostridia	Lachnospirales	Lachnospiraceae			ASV_ASV276	0.700194
1236663F1225672	19N_tarta	Not determined	004-005	Juveniles (2-25)	Curieuse (Nursery)	15.02.2020	Bacteria	Bacteroidota	Bacteroidia	Bacteroidales	Rikenellaceae			ASV_ASV264	0.698618
1236658F1225667	24C_tarta	F	030-040	Adults (26-70)	Curieuse	16.02.2020								ASV_ASV47	0.698455
1236692F1225701	7_tarta	F	015 -	Juveniles (2-25)	Parco Natura Viva	21.06.2021	Bacteria	Bacillota_A	Clostridia	Lachnospirales	Lachnospiraceae			ASV_ASV151	0.697776
1236668F1225677	22F_tarta	M	080-090	Elderly (71-100)	Curieuse	2022	Bacteria	Bacillota_A	Clostridia	Lachnospirales	Lachnospiraceae	Velocimicrobium	Velocimicrobium	ASV_ASV40	0.697532
1236659F1225668	28C_tarta	M	080-090	Elderly (71-100)	Curieuse	16.02.2020	Bacteria	Bacillota	Bacilli	Bacillales	DSM-1321	Pradoshia	Pradoshia	ASV_ASV144	0.69719
1236666F1225675	27C_tarta	M	080-090	Elderly (71-100)	Curieuse	16.02.2020	Bacteria	Bacteroidota	Bacteroidia	Bacteroidales	UBA932	Bact-08	Bact-08	ASV_ASV5	0.696641
1236686F1225695	17F_tarta	M	080-090	Elderly (71-100)	Botanical Garden	2022	Bacteria	Bacillota_A	Clostridia	Clostridiales	Clostridiaceae	Clostridium	Clostridium	ASV_ASV42	0.696126
1236696F1225705	20C_tarta	F	040-050	Adults (26-70)	Curieuse	16.02.2020	Bacteria	Bacillota_A	Clostridia	Clostridiales	Clostridiaceae	Clostridium	Clostridium	ASV_ASV711	0.695216
1236664F1225673	12GH_tarta (=20C)	F	040-050	Adults (26-70)	Curieuse	15.02.2020	Bacteria	Bacteroidota	Bacteroidia	Bacteroidales				ASV_ASV77	0.695118
1236690F1225699	30F_tarta	Not determined	004-005	Juveniles (2-25)	Private Garden	2022	Bacteria	Bacteroidota	Bacteroidia	Bacteroidales				ASV_ASV4	0.694908
1236666F1225675	27C_tarta	M	080-090	Elderly (71-100)	Curieuse	16.02.2020	Bacteria	Bacillota_A	Clostridia	Lachnospirales	Lachnospiraceae			ASV_ASV118	0.69276
1236706F1225715	7BG_tarta	F	050-060	Adults (26-70)	Botanical Garden	19.02.2020	Bacteria	Bacteroidota	Bacteroidia	Bacteroidales	UBA932	Bact-08	Bact-08	ASV_ASV22	0.691546
1236707F1225716	8BG_tarta	M	100 +	Centenarians (101+)	Botanical Garden	19.02.2020	Bacteria	Bacillota_A	Clostridia	Clostridiales	Clostridiaceae	Sarcina	Sarcina	ASV_ASV154	0.689929
1236704F1225713	5BG_tarta	M	080-090	Elderly (71-100)	Botanical Garden	19.02.2020	Bacteria	Bacillota_A	Clostridia	Lachnospirales	Lachnospiraceae			ASV_ASV31	0.68929
1236660F1225669	30C_tarta	M	090-100	Elderly (71-100)	Curieuse	17.02.2020	Bacteria	Bacillota	Bacilli	Bacillales	DSM-1321	Bacillus_AD	Bacillus_AD	ASV_ASV165	0.689013
1236660F1225669	30C_tarta	M	090-100	Elderly (71-100)	Curieuse	17.02.2020	Bacteria	Fibrobacterota	Chitinivibrionia	Chitinivibrionales	Chitinispirillaceae	JAAYPC01	JAAYPC01	ASV_ASV39	0.689013
1236682F1225691	25F_tarta	Not determined	005 -	Juveniles (2-25)	Curieuse (Nursery)	2022	Bacteria	Bacillota_A	Clostridia	Lachnospirales	Lachnospiraceae			ASV_ASV17	0.68892
1236665F1225674	23C_tarta	M	100 +	Centenarians (101+)	Curieuse	16.02.2020	Bacteria	Bacteroidota	Kapabacteria	Kapabacteriales				ASV_ASV33	0.688432
1236702F1225711	3BG_tarta	F	030-040	Adults (26-70)	Botanical Garden	19.02.2020	Bacteria	Bacillota_A	Clostridia	Oscillospirales	Ruminococcaceae	Ruminococcus_D	Ruminococcus_D	ASV_ASV146	0.68804
1236689F1225698	29F_tarta	Not determined	004-005	Juveniles (2-25)	Private Garden	2022	Bacteria	Bacillota_A	Clostridia	Clostridiales	Clostridiaceae	Clostridium	Clostridium	ASV_ASV68	0.687914
1236692F1225701	7_tarta	F	015 -	Juveniles (2-25)	Parco Natura Viva	21.06.2021	Bacteria	Bacillota_A	Clostridia	Clostridiales	Clostridiaceae	Clostridium	Clostridium	ASV_ASV137	0.687712
1236685F1225694	16F_tarta	M	080-090	Elderly (71-100)	Botanical Garden	2022	Bacteria	Bacillota_A	Clostridia	Lachnospirales	Lachnospiraceae			ASV_ASV494	0.68725
1236678F1225687	2N_tarta	Not determined	002-003	Juveniles (2-25)	Curieuse (Nursery)	17.02.2020	Bacteria	Bacillota_A	Clostridia	Lachnospirales	Lachnospiraceae			ASV_ASV1082	0.686465
1236662F1225671	n2_tarta	M	070-080	Elderly (71-100)	Curieuse	14.02.2020	Bacteria	Bacillota_A	Clostridia	Oscillospirales				ASV_ASV179	0.685801
1236703F1225712	4BG_tarta	M	030-040	Adults (26-70)	Botanical Garden	19.02.2020	Bacteria	Bacillota_A	Clostridia	Clostridiales	Clostridiaceae	Clostridium	Clostridium	ASV_ASV8	0.685562
1236693F1225702	8_tarta	F	100 +	Centenarians (101+)	Parco Natura Viva	21.06.2021	Bacteria	Bacillota_A	Clostridia	Lachnospirales	Lachnospiraceae			ASV_ASV151	0.685372
1236660F1225669	30C_tarta	M	090-100	Elderly (71-100)	Curieuse	17.02.2020	Bacteria	Bacteroidota	Bacteroidia	Bacteroidales	UBA932			ASV_ASV65	0.684358
1236706F1225715	7BG_tarta	F	050-060	Adults (26-70)	Botanical Garden	19.02.2020	Bacteria	Bacillota_A	Clostridia	Lachnospirales	Lachnospiraceae			ASV_ASV17	0.684001
1236707F1225716	8BG_tarta	M	100 +	Centenarians (101+)	Botanical Garden	19.02.2020								ASV_ASV112	0.681998
1236698F1225707	22C_tarta	M	090-100	Elderly (71-100)	Curieuse	16.02.2020	Bacteria	Bacillota_A	Clostridia	Clostridiales	Clostridiaceae	Clostridium_AN	Clostridium_AN	ASV_ASV419	0.681864
1236695F1225704	11_tarta	F	015 -	Juveniles (2-25)	Parco Natura Viva	21.06.2021	Bacteria	Bacillota_A	Clostridia	Lachnospirales	Lachnospiraceae			ASV_ASV121	0.681488
1236708F1225717	15C_tarta	M	080-090	Elderly (71-100)	Curieuse	15.02.2020	Bacteria	Bacillota_A	Clostridia	Clostridiales	Clostridiaceae	Clostridium	Clostridium	ASV_ASV44	0.681042
1236658F1225667	24C_tarta	F	030-040	Adults (26-70)	Curieuse	16.02.2020	Bacteria	Bacillota	Bacilli	Bacillales	DSM-1321	Bacillus_AD	Bacillus_AD	ASV_ASV6	0.680546
1236687F1225696	18F_tarta	F	040-050	Adults (26-70)	Botanical Garden	2022	Bacteria	Bacillota_A	Clostridia	Lachnospirales	Lachnospiraceae			ASV_ASV121	0.68052
1236691F1225700	31F_tarta	Not determined	004-005	Juveniles (2-25)	Private Garden	2022	Bacteria	Bacillota_A	Clostridia	Lachnospirales	Lachnospiraceae			ASV_ASV45	0.680345
1236671F1225680	ROGER_tarta	M	100 +	Centenarians (101+)	Parco Natura Viva	21.06.2021	Bacteria	Bacillota_A	Clostridia	Lachnospirales	Lachnospiraceae			ASV_ASV66	0.6781
1236674F1225683	n8_tarta	Not determined	004-005	Juveniles (2-25)	Curieuse (Nursery)	14.02.2020	Bacteria	Bacillota_A	Clostridia	Oscillospirales	Acutalibacteraceae			ASV_ASV410	0.677826
1236692F1225701	7_tarta	F	015 -	Juveniles (2-25)	Parco Natura Viva	21.06.2021	Bacteria	Bacillota_A	Clostridia	Clostridiales	Clostridiaceae	Clostridium	Clostridium	ASV_ASV78	0.677648
1236662F1225671	n2_tarta	M	070-080	Elderly (71-100)	Curieuse	14.02.2020	Bacteria	Bacillota_A	Clostridia	Oscillospirales	Ruminococcaceae			ASV_ASV216	0.677335
1236699F1225708	31C_tarta	Not determined	004-005	Juveniles (2-25)	Curieuse (Nursery)	17.02.2020	Bacteria	Bacillota_A	Clostridia	Lachnospirales	Lachnospiraceae			ASV_ASV25	0.677083
1236701F1225710	2BG_tarta	F	040-050	Adults (26-70)	Botanical Garden	19.02.2020	Bacteria							ASV_ASV100	0.676829
1236701F1225710	2BG_tarta	F	040-050	Adults (26-70)	Botanical Garden	19.02.2020	Bacteria							ASV_ASV152	0.676829
1236687F1225696	18F_tarta	F	040-050	Adults (26-70)	Botanical Garden	2022	Bacteria	Spirochaetota	Spirochaetia	Treponematales	Treponemataceae	Treponema_C	Treponema_C	ASV_ASV492	0.676469
1236660F1225669	30C_tarta	M	090-100	Elderly (71-100)	Curieuse	17.02.2020	Bacteria	Bacillota	Bacilli	Erysipelotrichales	Erysipelotrichaceae	Breznakia	Breznakia	ASV_ASV174	0.675047
1236680F1225689	4N_tarta	Not determined	2	Juveniles (2-25)	Curieuse (Nursery)	17.02.2020	Bacteria	Bacteroidota	Bacteroidia	Flavobacteriales	Flavobacteriaceae	Flavobacterium	Flavobacterium	ASV_ASV676	0.67503
1236700F1225709	1BG_tarta	F	030-040	Adults (26-70)	Botanical Garden	19.02.2020	Bacteria	Bacteroidota	Bacteroidia	Bacteroidales				ASV_ASV77	0.674109
1236693F1225702	8_tarta	F	100 +	Centenarians (101+)	Parco Natura Viva	21.06.2021	Bacteria	Bacillota	Bacilli	Bacillales	DSM-1321	Bacillus_AD	Bacillus_AD	ASV_ASV35	0.674013
1236691F1225700	31F_tarta	Not determined	004-005	Juveniles (2-25)	Private Garden	2022	Bacteria	Bacillota	Bacilli	Bacillales	DSM-1321	Bacillus_AD	Bacillus_AD	ASV_ASV290	0.673946
1236706F1225715	7BG_tarta	F	050-060	Adults (26-70)	Botanical Garden	19.02.2020	Bacteria	Bacillota_A	Clostridia	Lachnospirales	Lachnospiraceae	Velocimicrobium	Velocimicrobium	ASV_ASV116	0.673943
1236709F1225718	BULBO_tarta	M	100 +	Centenarians (101+)	Parco Natura Viva	21.06.2021	Bacteria	Bacillota_A	Clostridia	Clostridiales	Clostridiaceae	Clostridium	Clostridium	ASV_ASV36	0.67344
1236676F1225685	n10_tarta	M	090-100	Elderly (71-100)	Curieuse	15.02.2020	Bacteria	Spirochaetota	Spirochaetia	Treponematales	Treponemataceae			ASV_ASV166	0.672279
1236701F1225710	2BG_tarta	F	040-050	Adults (26-70)	Botanical Garden	19.02.2020	Bacteria	Bacillota_A	Clostridia	Clostridiales	Clostridiaceae			ASV_ASV101	0.670839
1236660F1225669	30C_tarta	M	090-100	Elderly (71-100)	Curieuse	17.02.2020	Bacteria	Bacillota_A	Clostridia	Lachnospirales	Lachnospiraceae			ASV_ASV118	0.670391
1236704F1225713	5BG_tarta	M	080-090	Elderly (71-100)	Botanical Garden	19.02.2020	Bacteria	Bacillota_A	Clostridia	Clostridiales	Clostridiaceae	Clostridium	Clostridium	ASV_ASV9	0.670009
1236684F1225693	27_tarta	Not determined	001-002	Juveniles (2-25)	Curieuse (Nursery)	2022	Bacteria	Bacillota_A	Clostridia	Lachnospirales	Lachnospiraceae			ASV_ASV151	0.669833
1236677F1225686	1N_tarta	Not determined	001-002	Juveniles (2-25)	Curieuse (Nursery)	17.02.2020	Bacteria	Bacillota	Bacilli	Bacillales	DSM-1321	Bacillus_AD	Bacillus_AD	ASV_ASV6	0.669141
1236709F1225718	BULBO_tarta	M	100 +	Centenarians (101+)	Parco Natura Viva	21.06.2021	Bacteria	Bacillota_A	Clostridia	Clostridiales	Clostridiaceae	Clostridium	Clostridium	ASV_ASV20	0.667634
1236692F1225701	7_tarta	F	015 -	Juveniles (2-25)	Parco Natura Viva	21.06.2021	Bacteria	Bacillota_A	Clostridia	Lachnospirales	Lachnospiraceae			ASV_ASV14	0.667584
1236673F1225682	n6_tarta	M	070-080	Elderly (71-100)	Curieuse	14.02.2020	Bacteria	Bacteroidota	Bacteroidia	Bacteroidales	UBA932	Coprenecus	Coprenecus	ASV_ASV3	0.667557
1236708F1225717	15C_tarta	M	080-090	Elderly (71-100)	Curieuse	15.02.2020	Bacteria	Bacillota_A	Clostridia	Lachnospirales	Lachnospiraceae	Velocimicrobium	Velocimicrobium	ASV_ASV40	0.667382
1236705F1225714	6BG_tarta	M	040-050	Adults (26-70)	Botanical Garden	19.02.2020	Bacteria	Bacillota_A	Clostridia	Lachnospirales	Lachnospiraceae			ASV_ASV131	0.666825
1236696F1225705	20C_tarta	F	040-050	Adults (26-70)	Curieuse	16.02.2020	Bacteria	Pseudomonadota	Gammaproteobacteria	Enterobacterales_A	Succinivibrionaceae	Succinivibrio	Succinivibrio	ASV_ASV173	0.66642
1236676F1225685	n10_tarta	M	090-100	Elderly (71-100)	Curieuse	15.02.2020	Bacteria	Bacillota_A	Clostridia	Clostridiales	Clostridiaceae	Clostridium_AA	Clostridium_AA	ASV_ASV99	0.665996
1236692F1225701	7_tarta	F	015 -	Juveniles (2-25)	Parco Natura Viva	21.06.2021	Bacteria	Bacillota_A	Clostridia	Clostridiales	Clostridiaceae	Clostridium	Clostridium	ASV_ASV103	0.664229
1236664F1225673	12GH_tarta (=20C)	F	040-050	Adults (26-70)	Curieuse	15.02.2020	Bacteria	Bacillota_A	Clostridia	Clostridiales	Clostridiaceae	Clostridium	Clostridium	ASV_ASV9	0.662787
1236670F1225679	4Na_tarta	Not determined	002-003	Juveniles (2-25)	Curieuse (Nursery)	17.02.2020	Bacteria	Bacteroidota	Bacteroidia	CAIKAF01	CAIKAF01	BA4	BA4	ASV_ASV642	0.662607
1236691F1225700	31F_tarta	Not determined	004-005	Juveniles (2-25)	Private Garden	2022	Bacteria	Bacillota_A	Clostridia	Lachnospirales	Lachnospiraceae			ASV_ASV122	0.66115
1236683F1225692	26_tarta	Not determined	001-002	Juveniles (2-25)	Curieuse (Nursery)	2022	Bacteria	Bacillota_A	Clostridia	Lachnospirales	Lachnospiraceae			ASV_ASV246	0.660629
1236672F1225681	10BG_tarta	M	040-050	Adults (26-70)	Botanical Garden	19.02.2020	Bacteria	Spirochaetota	Spirochaetia	Treponematales	Treponemataceae	Treponema_D	Treponema_D	ASV_ASV363	0.660429
1236700F1225709	1BG_tarta	F	030-040	Adults (26-70)	Botanical Garden	19.02.2020	Bacteria	Bacillota_A	Clostridia	Oscillospirales	Ruminococcaceae	Ruminococcus_D	Ruminococcus_D	ASV_ASV146	0.659842
1236693F1225702	8_tarta	F	100 +	Centenarians (101+)	Parco Natura Viva	21.06.2021	Bacteria	Bacillota_A	Clostridia	Peptostreptococcales	Peptostreptococcaceae	Romboutsia_D	Romboutsia_D	ASV_ASV345	0.658866
1236658F1225667	24C_tarta	F	030-040	Adults (26-70)	Curieuse	16.02.2020	Bacteria	Bacillota_A	Clostridia	Lachnospirales	Lachnospiraceae			ASV_ASV25	0.65816
1236685F1225694	16F_tarta	M	080-090	Elderly (71-100)	Botanical Garden	2022	Bacteria	Bacteroidota	Bacteroidia	Bacteroidales	WCHB1-69	UBA5429	UBA5429	ASV_ASV23	0.657691
1236672F1225681	10BG_tarta	M	040-050	Adults (26-70)	Botanical Garden	19.02.2020	Bacteria	Bacillota_A	Clostridia	Lachnospirales	Lachnospiraceae			ASV_ASV57	0.657533
1236688F1225697	19F_tarta	F	005-006	Juveniles (2-25)	Botanical Garden	2022	Bacteria	Bacteroidota	Bacteroidia	Bacteroidales	Bacteroidaceae	Prevotella	Prevotella	ASV_ASV763	0.65719
1236680F1225689	4N_tarta	Not determined	2	Juveniles (2-25)	Curieuse (Nursery)	17.02.2020	Bacteria	Bacteroidota	Bacteroidia	Flavobacteriales	Weeksellaceae	Planobacterium	Planobacterium	ASV_ASV526	0.657109
1236657F1225666	�	F	030-040	Adults (26-70)	Curieuse	14.02.2020	Bacteria	Bacillota_A	Clostridia	Lachnospirales	Lachnospiraceae			ASV_ASV25	0.656392
1236702F1225711	3BG_tarta	F	030-040	Adults (26-70)	Botanical Garden	19.02.2020	Bacteria	Bacillota_A	Clostridia	Clostridiales	Clostridiaceae			ASV_ASV140	0.656381
1236700F1225709	1BG_tarta	F	030-040	Adults (26-70)	Botanical Garden	19.02.2020	Bacteria	Bacteroidota	Bacteroidia	Bacteroidales	UBA932			ASV_ASV56	0.656276
1236700F1225709	1BG_tarta	F	030-040	Adults (26-70)	Botanical Garden	19.02.2020	Bacteria	Verrucomicrobiota	Verrucomicrobiae	Opitutales	UBA953	Spyradosoma	Spyradosoma	ASV_ASV687	0.656276
1236681F1225690	24F_tarta	M	030-040	Adults (26-70)	Curieuse	2022	Bacteria	Spirochaetota	Spirochaetia	Treponematales	UBA12059	SZUA-370	SZUA-370	ASV_ASV95	0.655442
1236673F1225682	n6_tarta	M	070-080	Elderly (71-100)	Curieuse	14.02.2020	Bacteria	Bacteroidota	Bacteroidia	Bacteroidales	WCHB1-69	UBA1205	UBA1205	ASV_ASV67	0.655419
1236697F1225706	21C_tarta	M	080-090	Elderly (71-100)	Curieuse	16.02.2020	Bacteria	Verrucomicrobiota	Verrucomicrobiae	Pedosphaerales	UBA1412	UBA1412	UBA1412	ASV_ASV133	0.655095
1236671F1225680	ROGER_tarta	M	100 +	Centenarians (101+)	Parco Natura Viva	21.06.2021	Bacteria	Bacillota_A	Clostridia	Clostridiales	Clostridiaceae	Clostridium	Clostridium	ASV_ASV137	0.655058
1236672F1225681	10BG_tarta	M	040-050	Adults (26-70)	Botanical Garden	19.02.2020	Bacteria	Bacillota_A	Clostridia	Clostridiales	Clostridiaceae			ASV_ASV140	0.654636
1236692F1225701	7_tarta	F	015 -	Juveniles (2-25)	Parco Natura Viva	21.06.2021	Bacteria	Bacillota_A	Clostridia	Lachnospirales	Lachnospiraceae			ASV_ASV251	0.654165
1236696F1225705	20C_tarta	F	040-050	Adults (26-70)	Curieuse	16.02.2020								ASV_ASV82	0.654079
1236670F1225679	4Na_tarta	Not determined	002-003	Juveniles (2-25)	Curieuse (Nursery)	17.02.2020								ASV_ASV47	0.653653
1236688F1225697	19F_tarta	F	005-006	Juveniles (2-25)	Botanical Garden	2022	Bacteria	Bacillota_A	Clostridia	TANB77	CAG-508	Scatovivens	Scatovivens	ASV_ASV812	0.653498
1236683F1225692	26_tarta	Not determined	001-002	Juveniles (2-25)	Curieuse (Nursery)	2022	Bacteria	Bacillota_A	Clostridia	Lachnospirales	Cellulosilyticaceae	Cellulosilyticum	Cellulosilyticum	ASV_ASV50	0.653207
1236686F1225695	17F_tarta	M	080-090	Elderly (71-100)	Botanical Garden	2022								ASV_ASV124	0.652408
1236677F1225686	1N_tarta	Not determined	001-002	Juveniles (2-25)	Curieuse (Nursery)	17.02.2020	Bacteria	Bacillota	Bacilli	Bacillales	Planococcaceae	Ureibacillus	Ureibacillus	ASV_ASV1329	0.652272
1236662F1225671	n2_tarta	M	070-080	Elderly (71-100)	Curieuse	14.02.2020	Bacteria	Bacillota_A	Clostridia	Oscillospirales	Oscillospiraceae			ASV_ASV235	0.651935
1236669F1225678	17C_tarta	M	060-070	Adults (26-70)	Curieuse	15.02.2020	Bacteria	Bacteroidota	Bacteroidia	Bacteroidales	WCHB1-69	UBA1205	UBA1205	ASV_ASV67	0.651404
1236679F1225688	3N_tarta	Not determined	002-003	Juveniles (2-25)	Curieuse (Nursery)	17.02.2020								ASV_ASV798	0.651067
1236667F1225676	29C_tarta	M	100 +	Centenarians (101+)	Curieuse	17.02.2020	Bacteria	Bacillota_A	Clostridia	Clostridiales	Clostridiaceae	Clostridium_AA	Clostridium_AA	ASV_ASV61	0.650568
1236668F1225677	22F_tarta	M	080-090	Elderly (71-100)	Curieuse	2022	Bacteria	Bacillota_A	Clostridia	Oscillospirales	Ruminococcaceae	Ruminococcus_F	Ruminococcus_F	ASV_ASV570	0.64961
1236675F1225684	n9_tarta	M	070-080	Elderly (71-100)	Curieuse	15.02.2020	Bacteria	Bacteroidota	Bacteroidia	Bacteroidales	Bacteroidaceae	Bacteroides_H	Bacteroides_H	ASV_ASV310	0.649158
1236697F1225706	21C_tarta	M	080-090	Elderly (71-100)	Curieuse	16.02.2020	Bacteria	Bacteroidota	Bacteroidia	Bacteroidales	Paludibacteraceae	HGM05398	HGM05398	ASV_ASV221	0.648973
1236664F1225673	12GH_tarta (=20C)	F	040-050	Adults (26-70)	Curieuse	15.02.2020	Bacteria	Bacillota_A	Clostridia	Lachnospirales	Lachnospiraceae			ASV_ASV14	0.648931
1236671F1225680	ROGER_tarta	M	100 +	Centenarians (101+)	Parco Natura Viva	21.06.2021	Bacteria	Bacillota_A	Clostridia	Clostridiales	Clostridiaceae	Sarcina	Sarcina	ASV_ASV223	0.648474
1236666F1225675	27C_tarta	M	080-090	Elderly (71-100)	Curieuse	16.02.2020	Bacteria	Bacillota_A	Clostridia	TANB77	CAG-508			ASV_ASV87	0.648128
1236708F1225717	15C_tarta	M	080-090	Elderly (71-100)	Curieuse	15.02.2020	Bacteria	Bacillota_A	Clostridia	Peptostreptococcales	Peptostreptococcaceae			ASV_ASV58	0.647868
1236685F1225694	16F_tarta	M	080-090	Elderly (71-100)	Botanical Garden	2022	Bacteria	Bacillota_A	Clostridia	Peptostreptococcales	Peptostreptococcaceae			ASV_ASV98	0.647345
1236704F1225713	5BG_tarta	M	080-090	Elderly (71-100)	Botanical Garden	19.02.2020	Bacteria	Bacteroidota	Bacteroidia	Bacteroidales	UBA932			ASV_ASV183	0.645908
1236686F1225695	17F_tarta	M	080-090	Elderly (71-100)	Botanical Garden	2022	Bacteria	Bacillota_A	Clostridia	TANB77	CAG-508	Scatovivens	Scatovivens	ASV_ASV567	0.645682
1236674F1225683	n8_tarta	Not determined	004-005	Juveniles (2-25)	Curieuse (Nursery)	14.02.2020	Bacteria	Bacillota_A	Clostridia	Oscillospirales	CAG-272			ASV_ASV250	0.644761
1236674F1225683	n8_tarta	Not determined	004-005	Juveniles (2-25)	Curieuse (Nursery)	14.02.2020	Bacteria	Bacillota	Bacilli	ML615J-28	CAG-698	CAG-698	CAG-698	ASV_ASV476	0.644761
1236668F1225677	22F_tarta	M	080-090	Elderly (71-100)	Curieuse	2022								ASV_ASV124	0.644285
1236695F1225704	11_tarta	F	015 -	Juveniles (2-25)	Parco Natura Viva	21.06.2021	Bacteria	Bacillota_A	Clostridia	Lachnospirales	Lachnospiraceae			ASV_ASV66	0.644173
1236669F1225678	17C_tarta	M	060-070	Adults (26-70)	Curieuse	15.02.2020	Bacteria	Bacillota_A	Clostridia	Lachnospirales	Lachnospiraceae			ASV_ASV14	0.643295
1236665F1225674	23C_tarta	M	100 +	Centenarians (101+)	Curieuse	16.02.2020	Bacteria	Bacteroidota	Bacteroidia	Bacteroidales	UBA932			ASV_ASV37	0.643232
1236667F1225676	29C_tarta	M	100 +	Centenarians (101+)	Curieuse	17.02.2020	Bacteria							ASV_ASV152	0.641951
1236702F1225711	3BG_tarta	F	030-040	Adults (26-70)	Botanical Garden	19.02.2020	Bacteria	Bacteroidota	Kapabacteria	Kapabacteriales				ASV_ASV33	0.641607
1236689F1225698	29F_tarta	Not determined	004-005	Juveniles (2-25)	Private Garden	2022	Bacteria	Bacillota_A	Clostridia	Lachnospirales	Lachnospiraceae			ASV_ASV465	0.641538
1236689F1225698	29F_tarta	Not determined	004-005	Juveniles (2-25)	Private Garden	2022	Bacteria	Bacillota_A	Clostridia	Lachnospirales	Lachnospiraceae	Lachnoclostridium	Lachnoclostridium	ASV_ASV94	0.641538
1236690F1225699	30F_tarta	Not determined	004-005	Juveniles (2-25)	Private Garden	2022	Bacteria	Campylobacterota	Campylobacteria	Campylobacterales	Arcobacteraceae	Aliarcobacter	Aliarcobacter	ASV_ASV1679	0.641454
1236704F1225713	5BG_tarta	M	080-090	Elderly (71-100)	Botanical Garden	19.02.2020	Bacteria	Bacteroidota	Bacteroidia	Bacteroidales	WCHB1-69	UBA5429	UBA5429	ASV_ASV132	0.641087
1236676F1225685	n10_tarta	M	090-100	Elderly (71-100)	Curieuse	15.02.2020	Bacteria	Bacillota_A	Clostridia	Oscillospirales	Ruminococcaceae	Anaerofilum	Anaerofilum	ASV_ASV109	0.640865
1236684F1225693	27_tarta	Not determined	001-002	Juveniles (2-25)	Curieuse (Nursery)	2022	Bacteria	Bacillota_A	Clostridia	Lachnospirales	Lachnospiraceae	KM106-2	KM106-2	ASV_ASV808	0.63984
1236680F1225689	4N_tarta	Not determined	2	Juveniles (2-25)	Curieuse (Nursery)	17.02.2020	Bacteria	Pseudomonadota	Gammaproteobacteria	Burkholderiales				ASV_ASV128	0.639188
1236689F1225698	29F_tarta	Not determined	004-005	Juveniles (2-25)	Private Garden	2022	Bacteria	Bacillota_A	Clostridia	Lachnospirales	Lachnospiraceae			ASV_ASV14	0.638961
1236671F1225680	ROGER_tarta	M	100 +	Centenarians (101+)	Parco Natura Viva	21.06.2021	Bacteria	Bacteroidota	Bacteroidia	Bacteroidales	WCHB1-69	UBA5429	UBA5429	ASV_ASV21	0.638599
1236659F1225668	28C_tarta	M	080-090	Elderly (71-100)	Curieuse	16.02.2020	Bacteria	Bacillota_A	Clostridia	Oscillospirales	Ruminococcaceae	Anaerofilum	Anaerofilum	ASV_ASV109	0.637674
1236672F1225681	10BG_tarta	M	040-050	Adults (26-70)	Botanical Garden	19.02.2020	Bacteria	Bacteroidota	Bacteroidia	Bacteroidales	UBA932			ASV_ASV89	0.637256
1236695F1225704	11_tarta	F	015 -	Juveniles (2-25)	Parco Natura Viva	21.06.2021	Bacteria	Bacillota_A	Clostridia	Clostridiales	Clostridiaceae	Clostridium	Clostridium	ASV_ASV74	0.636317
1236667F1225676	29C_tarta	M	100 +	Centenarians (101+)	Curieuse	17.02.2020	Bacteria	Fibrobacterota	Chitinivibrionia	Chitinivibrionales	Chitinispirillaceae	JAAYPC01	JAAYPC01	ASV_ASV39	0.635488
1236667F1225676	29C_tarta	M	100 +	Centenarians (101+)	Curieuse	17.02.2020	Bacteria	Bacteroidota	Bacteroidia	Bacteroidales	UBA932	Bact-08	Bact-08	ASV_ASV5	0.635488
1236671F1225680	ROGER_tarta	M	100 +	Centenarians (101+)	Parco Natura Viva	21.06.2021	Bacteria	Bacillota_A	Clostridia	Clostridiales	Clostridiaceae	Clostridium	Clostridium	ASV_ASV36	0.635307
1236684F1225693	27_tarta	Not determined	001-002	Juveniles (2-25)	Curieuse (Nursery)	2022	Bacteria	Bacillota_A	Clostridia	Christensenellales	UBA1242			ASV_ASV198	0.634841
1236676F1225685	n10_tarta	M	090-100	Elderly (71-100)	Curieuse	15.02.2020	Bacteria	Bacillota_A	Clostridia	Lachnospirales	Lachnospiraceae			ASV_ASV511	0.634582
1236663F1225672	19N_tarta	Not determined	004-005	Juveniles (2-25)	Curieuse (Nursery)	15.02.2020	Bacteria	Bacillota_A	Clostridia	Oscillospirales	Acutalibacteraceae			ASV_ASV212	0.634407
1236675F1225684	n9_tarta	M	070-080	Elderly (71-100)	Curieuse	15.02.2020	Bacteria	Bacteroidota	Bacteroidia	Bacteroidales				ASV_ASV12	0.634337
1236661F1225670	9BG_tarta	M	090-100	Elderly (71-100)	Botanical Garden	18.02.2020	Bacteria	Bacteroidota	Bacteroidia	Bacteroidales	Tenuifilaceae	JACJXD01	JACJXD01	ASV_ASV969	0.634271
1236680F1225689	4N_tarta	Not determined	2	Juveniles (2-25)	Curieuse (Nursery)	17.02.2020	Bacteria	Bacillota	Bacilli	Bacillales	DSM-1321	Bacillus_AD	Bacillus_AD	ASV_ASV312	0.633214
1236703F1225712	4BG_tarta	M	030-040	Adults (26-70)	Botanical Garden	19.02.2020	Bacteria	Bacillota_A	Clostridia	Lachnospirales	Lachnospiraceae			ASV_ASV88	0.632267
1236678F1225687	2N_tarta	Not determined	002-003	Juveniles (2-25)	Curieuse (Nursery)	17.02.2020	Bacteria	Bacillota_A	Clostridia	Lachnospirales	Lachnospiraceae			ASV_ASV366	0.631747
1236688F1225697	19F_tarta	F	005-006	Juveniles (2-25)	Botanical Garden	2022	Bacteria	Bacillota_A	Clostridia	TANB77	CAG-508	Scatovivens	Scatovivens	ASV_ASV567	0.631346
1236659F1225668	28C_tarta	M	080-090	Elderly (71-100)	Curieuse	16.02.2020	Bacteria	Bacteroidota	Bacteroidia	Bacteroidales				ASV_ASV4	0.631297
1236691F1225700	31F_tarta	Not determined	004-005	Juveniles (2-25)	Private Garden	2022	Bacteria	Bacillota	Bacilli	Bacillales	DSM-18226	Cytobacillus	Cytobacillus	ASV_ASV744	0.631292
1236661F1225670	9BG_tarta	M	090-100	Elderly (71-100)	Botanical Garden	18.02.2020	Bacteria	Bacteroidota	Bacteroidia	Bacteroidales	UBA932	Bact-08	Bact-08	ASV_ASV22	0.630861
1236664F1225673	12GH_tarta (=20C)	F	040-050	Adults (26-70)	Curieuse	15.02.2020	Bacteria	Bacillota_A	Clostridia	TANB77	UBA1234	HGM13618	HGM13618	ASV_ASV478	0.630456
1236707F1225716	8BG_tarta	M	100 +	Centenarians (101+)	Botanical Garden	19.02.2020	Bacteria	Bacillota_A	Clostridia	Clostridiales	Clostridiaceae			ASV_ASV140	0.630452
1236707F1225716	8BG_tarta	M	100 +	Centenarians (101+)	Botanical Garden	19.02.2020	Bacteria	Bacillota_A	Clostridia	Lachnospirales	Lachnospiraceae			ASV_ASV88	0.630452
1236657F1225666	�	F	030-040	Adults (26-70)	Curieuse	14.02.2020	Bacteria	Bacillota_A	Clostridia	Clostridiales	Clostridiaceae	Clostridium	Clostridium	ASV_ASV36	0.630136
1236693F1225702	8_tarta	F	100 +	Centenarians (101+)	Parco Natura Viva	21.06.2021	Bacteria	Bacillota_A	Clostridia	Lachnospirales	Lachnospiraceae			ASV_ASV122	0.628574
1236683F1225692	26_tarta	Not determined	001-002	Juveniles (2-25)	Curieuse (Nursery)	2022	Bacteria	Bacillota_A	Clostridia	Lachnospirales	Cellulosilyticaceae	Cellulosilyticum	Cellulosilyticum	ASV_ASV134	0.628464
1236675F1225684	n9_tarta	M	070-080	Elderly (71-100)	Curieuse	15.02.2020	Bacteria	Bacteroidota	Bacteroidia	Bacteroidales				ASV_ASV4	0.628409
1236679F1225688	3N_tarta	Not determined	002-003	Juveniles (2-25)	Curieuse (Nursery)	17.02.2020	Bacteria	Bacteroidota	Bacteroidia	Bacteroidales	UBA932	Bact-08	Bact-08	ASV_ASV5	0.628088
1236687F1225696	18F_tarta	F	040-050	Adults (26-70)	Botanical Garden	2022	Bacteria	Bacillota_A	Clostridia	Clostridiales	Clostridiaceae			ASV_ASV185	0.627861
1236688F1225697	19F_tarta	F	005-006	Juveniles (2-25)	Botanical Garden	2022	Bacteria	Bacillota_A	Clostridia	Clostridiales	Clostridiaceae	Clostridium_J	Clostridium_J	ASV_ASV756	0.627654
1236697F1225706	21C_tarta	M	080-090	Elderly (71-100)	Curieuse	16.02.2020	Bacteria	Bacillota	Bacilli	Lactobacillales	Streptococcaceae	Streptococcus	Streptococcus	ASV_ASV334	0.627545
1236697F1225706	21C_tarta	M	080-090	Elderly (71-100)	Curieuse	16.02.2020	Bacteria	Bacillota_A	Clostridia	Clostridiales	Clostridiaceae	Clostridium	Clostridium	ASV_ASV8	0.627545
1236669F1225678	17C_tarta	M	060-070	Adults (26-70)	Curieuse	15.02.2020	Bacteria	Bacillota_A	Clostridia	Lachnospirales	Lachnospiraceae			ASV_ASV108	0.627078
1236702F1225711	3BG_tarta	F	030-040	Adults (26-70)	Botanical Garden	19.02.2020	Bacteria	Bacteroidota	Bacteroidia	Bacteroidales	Bacteroidaceae			ASV_ASV145	0.626834
1236666F1225675	27C_tarta	M	080-090	Elderly (71-100)	Curieuse	16.02.2020	Bacteria	Bacillota_A	Clostridia	Oscillospirales	Ruminococcaceae	HUN007	HUN007	ASV_ASV16	0.626783
1236685F1225694	16F_tarta	M	080-090	Elderly (71-100)	Botanical Garden	2022	Bacteria	Bacteroidota	Bacteroidia	Bacteroidales	Bacteroidaceae	Prevotella	Prevotella	ASV_ASV360	0.626653
1236708F1225717	15C_tarta	M	080-090	Elderly (71-100)	Curieuse	15.02.2020	Bacteria	Bacteroidota	Bacteroidia	Bacteroidales	WCHB1-69	UBA1205	UBA1205	ASV_ASV67	0.626403
1236705F1225714	6BG_tarta	M	040-050	Adults (26-70)	Botanical Garden	19.02.2020	Bacteria	Bacillota_A	Clostridia	Oscillospirales	Oscillospiraceae	UBA1774	UBA1774	ASV_ASV62	0.626206
1236684F1225693	27_tarta	Not determined	001-002	Juveniles (2-25)	Curieuse (Nursery)	2022	Bacteria	Bacillota_A	Clostridia					ASV_ASV206	0.624844
1236684F1225693	27_tarta	Not determined	001-002	Juveniles (2-25)	Curieuse (Nursery)	2022	Bacteria	Bacillota_A	Clostridia	Lachnospirales	Lachnospiraceae			ASV_ASV31	0.624844
1236663F1225672	19N_tarta	Not determined	004-005	Juveniles (2-25)	Curieuse (Nursery)	15.02.2020	Bacteria	Bacteroidota	Bacteroidia					ASV_ASV649	0.624133
1236661F1225670	9BG_tarta	M	090-100	Elderly (71-100)	Botanical Garden	18.02.2020	Bacteria	Bacteroidota	Bacteroidia	Bacteroidales				ASV_ASV248	0.624041
1236673F1225682	n6_tarta	M	070-080	Elderly (71-100)	Curieuse	14.02.2020	Bacteria	Bacillota_A	Clostridia	Clostridiales	Clostridiaceae			ASV_ASV148	0.623053
1236673F1225682	n6_tarta	M	070-080	Elderly (71-100)	Curieuse	14.02.2020	Bacteria	Bacillota_A	Clostridia	Clostridiales	Clostridiaceae	Clostridium_AA	Clostridium_AA	ASV_ASV61	0.623053
1236681F1225690	24F_tarta	M	030-040	Adults (26-70)	Curieuse	2022	Bacteria	Bacteroidota	Bacteroidia	Bacteroidales	UBA932	Bact-08	Bact-08	ASV_ASV303	0.62292
1236667F1225676	29C_tarta	M	100 +	Centenarians (101+)	Curieuse	17.02.2020	Bacteria	Bacillota	Bacilli	Bacillales	DSM-1321	Bacillus_AD	Bacillus_AD	ASV_ASV35	0.622563
1236675F1225684	n9_tarta	M	070-080	Elderly (71-100)	Curieuse	15.02.2020	Bacteria	Bacillota	Bacilli	ML615J-28	CAG-313	UMGS75	UMGS75	ASV_ASV117	0.62248
1236658F1225667	24C_tarta	F	030-040	Adults (26-70)	Curieuse	16.02.2020	Bacteria	Bacillota_A	Clostridia	Lachnospirales	Lachnospiraceae			ASV_ASV237	0.622342
1236685F1225694	16F_tarta	M	080-090	Elderly (71-100)	Botanical Garden	2022	Bacteria	Bacillota_A	Clostridia	Peptostreptococcales	Anaerovoracaceae			ASV_ASV70	0.62222
1236696F1225705	20C_tarta	F	040-050	Adults (26-70)	Curieuse	16.02.2020	Bacteria	Bacteroidota	Bacteroidia	Bacteroidales	UBA932	Bact-08	Bact-08	ASV_ASV54	0.621169
1236677F1225686	1N_tarta	Not determined	001-002	Juveniles (2-25)	Curieuse (Nursery)	17.02.2020	Bacteria	Pseudomonadota	Gammaproteobacteria	Burkholderiales	Burkholderiaceae_B	Comamonas	Comamonas	ASV_ASV1362	0.618534
1236677F1225686	1N_tarta	Not determined	001-002	Juveniles (2-25)	Curieuse (Nursery)	17.02.2020	Bacteria	Bacillota	Bacilli	Lactobacillales	Streptococcaceae	Lactococcus	Lactococcus	ASV_ASV533	0.618534
1236697F1225706	21C_tarta	M	080-090	Elderly (71-100)	Curieuse	16.02.2020	Bacteria	Bacillota_A	Clostridia	Clostridiales	Clostridiaceae	Inconstantimicrobium	Inconstantimicrobium	ASV_ASV184	0.618361
1236681F1225690	24F_tarta	M	030-040	Adults (26-70)	Curieuse	2022	Bacteria	Bacillota_A	Clostridia	Lachnospirales	Lachnospiraceae			ASV_ASV31	0.617917
1236670F1225679	4Na_tarta	Not determined	002-003	Juveniles (2-25)	Curieuse (Nursery)	17.02.2020	Bacteria	Bacillota_A	Clostridia	Peptostreptococcales	Peptostreptococcaceae			ASV_ASV58	0.617837
1236703F1225712	4BG_tarta	M	030-040	Adults (26-70)	Botanical Garden	19.02.2020	Bacteria	Spirochaetota	Spirochaetia	Treponematales	Treponemataceae	Treponema_D	Treponema_D	ASV_ASV228	0.617733
1236661F1225670	9BG_tarta	M	090-100	Elderly (71-100)	Botanical Garden	18.02.2020	Bacteria	Bacillota_A	Clostridia	Clostridiales	Clostridiaceae			ASV_ASV101	0.617221
1236674F1225683	n8_tarta	Not determined	004-005	Juveniles (2-25)	Curieuse (Nursery)	14.02.2020	Bacteria	Bacillota	Bacilli	Bacillales	DSM-1321	Bacillus_AD	Bacillus_AD	ASV_ASV29	0.61583
1236676F1225685	n10_tarta	M	090-100	Elderly (71-100)	Curieuse	15.02.2020	Bacteria	Bacteroidota	Bacteroidia	Bacteroidales	Bacteroidaceae			ASV_ASV145	0.615733
1236709F1225718	BULBO_tarta	M	100 +	Centenarians (101+)	Parco Natura Viva	21.06.2021	Bacteria	Bacillota_A	Clostridia	Lachnospirales	Cellulosilyticaceae	Cellulosilyticum	Cellulosilyticum	ASV_ASV286	0.615385
1236703F1225712	4BG_tarta	M	030-040	Adults (26-70)	Botanical Garden	19.02.2020	Bacteria	Bacillota_A	Clostridia	Lachnospirales	Lachnospiraceae	Velocimicrobium	Velocimicrobium	ASV_ASV40	0.61531
1236684F1225693	27_tarta	Not determined	001-002	Juveniles (2-25)	Curieuse (Nursery)	2022	Bacteria	Bacillota_A	Clostridia	Lachnospirales	Lachnospiraceae			ASV_ASV851	0.614846
1236660F1225669	30C_tarta	M	090-100	Elderly (71-100)	Curieuse	17.02.2020	Bacteria	Bacillota_A	Clostridia	Clostridiales	Clostridiaceae	Clostridium_AA	Clostridium_AA	ASV_ASV61	0.614525
1236672F1225681	10BG_tarta	M	040-050	Adults (26-70)	Botanical Garden	19.02.2020	Bacteria	Bacteroidota	Bacteroidia	Bacteroidales				ASV_ASV77	0.614083
1236662F1225671	n2_tarta	M	070-080	Elderly (71-100)	Curieuse	14.02.2020	Bacteria	Bacillota_A	Clostridia	Clostridiales	Clostridiaceae	Clostridium	Clostridium	ASV_ASV1161	0.613835
1236671F1225680	ROGER_tarta	M	100 +	Centenarians (101+)	Parco Natura Viva	21.06.2021	Bacteria	Bacillota_A	Clostridia	Clostridiales	Clostridiaceae	Sarcina	Sarcina	ASV_ASV378	0.612265
1236704F1225713	5BG_tarta	M	080-090	Elderly (71-100)	Botanical Garden	19.02.2020	Bacteria	Bacillota_A	Clostridia	Lachnospirales	Lachnospiraceae			ASV_ASV28	0.612166
1236664F1225673	12GH_tarta (=20C)	F	040-050	Adults (26-70)	Curieuse	15.02.2020	Bacteria	Bacillota_A	Clostridia	Oscillospirales	QAMX01	RUG11797	RUG11797	ASV_ASV231	0.611981
1236698F1225707	22C_tarta	M	090-100	Elderly (71-100)	Curieuse	16.02.2020	Bacteria	Bacillota_A	Clostridia	TANB77	CAG-465	CAG-465	CAG-465	ASV_ASV513	0.611672
1236708F1225717	15C_tarta	M	080-090	Elderly (71-100)	Curieuse	15.02.2020	Bacteria	Bacillota_A	Clostridia	Lachnospirales	Lachnospiraceae	Lacrimispora	Lacrimispora	ASV_ASV243	0.610791
1236707F1225716	8BG_tarta	M	100 +	Centenarians (101+)	Botanical Garden	19.02.2020	Bacteria	Bacteroidota	Bacteroidia	Bacteroidales				ASV_ASV239	0.610626
1236692F1225701	7_tarta	F	015 -	Juveniles (2-25)	Parco Natura Viva	21.06.2021	Bacteria	Bacillota_A	Clostridia	Lachnospirales	Lachnospiraceae			ASV_ASV69	0.610554
1236681F1225690	24F_tarta	M	030-040	Adults (26-70)	Curieuse	2022	Bacteria	Bacillota_A	Clostridia	Lachnospirales	Lachnospiraceae			ASV_ASV93	0.610412
1236702F1225711	3BG_tarta	F	030-040	Adults (26-70)	Botanical Garden	19.02.2020	Bacteria	Bacteroidota	Bacteroidia	Bacteroidales	Bacteroidaceae			ASV_ASV119	0.609949
1236700F1225709	1BG_tarta	F	030-040	Adults (26-70)	Botanical Garden	19.02.2020	Bacteria	Bacillota_A	Clostridia	Lachnospirales	Lachnospiraceae			ASV_ASV88	0.609908
1236699F1225708	31C_tarta	Not determined	004-005	Juveniles (2-25)	Curieuse (Nursery)	17.02.2020	Bacteria	Bacillota_A	Clostridia	Clostridiales	Clostridiaceae	Clostridium	Clostridium	ASV_ASV55	0.609681
1236662F1225671	n2_tarta	M	070-080	Elderly (71-100)	Curieuse	14.02.2020	Bacteria	Bacillota_A	Clostridia	Lachnospirales	Lachnospiraceae			ASV_ASV118	0.609601
1236671F1225680	ROGER_tarta	M	100 +	Centenarians (101+)	Parco Natura Viva	21.06.2021	Bacteria	Bacteroidota	Bacteroidia	Bacteroidales				ASV_ASV4	0.608973
1236708F1225717	15C_tarta	M	080-090	Elderly (71-100)	Curieuse	15.02.2020	Bacteria	Bacillota_A	Clostridia	Clostridiales	Clostridiaceae	Clostridium_AA	Clostridium_AA	ASV_ASV61	0.60884
1236698F1225707	22C_tarta	M	090-100	Elderly (71-100)	Curieuse	16.02.2020	Bacteria	Bacteroidota	Bacteroidia	Bacteroidales				ASV_ASV13	0.608329
1236703F1225712	4BG_tarta	M	030-040	Adults (26-70)	Botanical Garden	19.02.2020	Bacteria	Bacillota_A	Clostridia	Lachnospirales	Lachnospiraceae			ASV_ASV2	0.608043
1236675F1225684	n9_tarta	M	070-080	Elderly (71-100)	Curieuse	15.02.2020	Bacteria	Bacillota_A	Clostridia	Oscillospirales	Oscillospiraceae			ASV_ASV335	0.607659
1236674F1225683	n8_tarta	Not determined	004-005	Juveniles (2-25)	Curieuse (Nursery)	14.02.2020	Bacteria	Bacillota_A	Clostridia	Lachnospirales	Lachnospiraceae			ASV_ASV25	0.607564
1236662F1225671	n2_tarta	M	070-080	Elderly (71-100)	Curieuse	14.02.2020	Bacteria	Bacillota_A	Clostridia	Peptostreptococcales	Peptostreptococcaceae			ASV_ASV268	0.605368
1236709F1225718	BULBO_tarta	M	100 +	Centenarians (101+)	Parco Natura Viva	21.06.2021	Bacteria	Bacteroidota	Bacteroidia	Bacteroidales	UBA932	Bact-08	Bact-08	ASV_ASV5	0.603774
1236687F1225696	18F_tarta	F	040-050	Adults (26-70)	Botanical Garden	2022	Bacteria	Bacteroidota	Bacteroidia	Bacteroidales	WCHB1-69	UBA5429	UBA5429	ASV_ASV21	0.603557
1236699F1225708	31C_tarta	Not determined	004-005	Juveniles (2-25)	Curieuse (Nursery)	17.02.2020	Bacteria	Bacteroidota	Bacteroidia	Bacteroidales	UBA932			ASV_ASV65	0.603554
1236676F1225685	n10_tarta	M	090-100	Elderly (71-100)	Curieuse	15.02.2020	Bacteria	Bacillota_A	Clostridia	Lachnospirales	Lachnospiraceae			ASV_ASV2	0.603167
1236676F1225685	n10_tarta	M	090-100	Elderly (71-100)	Curieuse	15.02.2020	Bacteria	Bacteroidota	Bacteroidia	Bacteroidales				ASV_ASV46	0.603167
1236705F1225714	6BG_tarta	M	040-050	Adults (26-70)	Botanical Garden	19.02.2020	Bacteria	Bacillota_A	Clostridia	Lachnospirales	Lachnospiraceae			ASV_ASV31	0.602512
1236693F1225702	8_tarta	F	100 +	Centenarians (101+)	Parco Natura Viva	21.06.2021	Bacteria	Bacillota_A	Clostridia	Peptostreptococcales	Peptostreptococcaceae			ASV_ASV58	0.602067
1236686F1225695	17F_tarta	M	080-090	Elderly (71-100)	Botanical Garden	2022	Bacteria	Bacteroidota	Bacteroidia	Bacteroidales				ASV_ASV550	0.601964
1236657F1225666	�	F	030-040	Adults (26-70)	Curieuse	14.02.2020	Bacteria	Bacteroidota	Bacteroidia	Bacteroidales				ASV_ASV77	0.601255
1236687F1225696	18F_tarta	F	040-050	Adults (26-70)	Botanical Garden	2022	Bacteria	Bacteroidota	Bacteroidia	Bacteroidales				ASV_ASV267	0.599506
1236674F1225683	n8_tarta	Not determined	004-005	Juveniles (2-25)	Curieuse (Nursery)	14.02.2020	Bacteria	Bacillota_A	Clostridia	Lachnospirales	Lachnospiraceae			ASV_ASV401	0.599297
1236663F1225672	19N_tarta	Not determined	004-005	Juveniles (2-25)	Curieuse (Nursery)	15.02.2020								ASV_ASV47	0.598449
1236698F1225707	22C_tarta	M	090-100	Elderly (71-100)	Curieuse	16.02.2020	Bacteria	Bacteroidota	Bacteroidia	Bacteroidales	UBA932			ASV_ASV65	0.598302
1236688F1225697	19F_tarta	F	005-006	Juveniles (2-25)	Botanical Garden	2022	Bacteria	Bacillota_A	Clostridia	Lachnospirales	Lachnospiraceae			ASV_ASV783	0.598117
1236676F1225685	n10_tarta	M	090-100	Elderly (71-100)	Curieuse	15.02.2020	Bacteria	Bacteroidota	Bacteroidia	Bacteroidales	UBA932			ASV_ASV37	0.596884
1236672F1225681	10BG_tarta	M	040-050	Adults (26-70)	Botanical Garden	19.02.2020	Bacteria	Bacillota_A	Clostridia	Oscillospirales	Oscillospiraceae	UBA1774	UBA1774	ASV_ASV62	0.596704
1236668F1225677	22F_tarta	M	080-090	Elderly (71-100)	Curieuse	2022	Bacteria	Bacillota_A	Clostridia	Lachnospirales	Cellulosilyticaceae	Cellulosilyticum	Cellulosilyticum	ASV_ASV908	0.596363
1236677F1225686	1N_tarta	Not determined	001-002	Juveniles (2-25)	Curieuse (Nursery)	17.02.2020	Bacteria	Spirochaetota	Spirochaetia	Treponematales	Treponemataceae	Treponema_D	Treponema_D	ASV_ASV229	0.596041
1236706F1225715	7BG_tarta	F	050-060	Adults (26-70)	Botanical Garden	19.02.2020	Bacteria	Bacillota_A	Clostridia	Lachnospirales	Lachnospiraceae			ASV_ASV163	0.595987
1236671F1225680	ROGER_tarta	M	100 +	Centenarians (101+)	Parco Natura Viva	21.06.2021	Bacteria	Bacteroidota	Bacteroidia	Bacteroidales	WCHB1-69	UBA5429	UBA5429	ASV_ASV18	0.595806
1236671F1225680	ROGER_tarta	M	100 +	Centenarians (101+)	Parco Natura Viva	21.06.2021	Bacteria	Bacteroidota	Bacteroidia	Bacteroidales	UBA932	Bact-08	Bact-08	ASV_ASV22	0.595806
1236675F1225684	n9_tarta	M	070-080	Elderly (71-100)	Curieuse	15.02.2020	Bacteria	Bacillota_A	Clostridia	Lachnospirales	Lachnospiraceae			ASV_ASV429	0.595803
1236658F1225667	24C_tarta	F	030-040	Adults (26-70)	Curieuse	16.02.2020	Bacteria	Bacteroidota	Bacteroidia	Bacteroidales	WCHB1-69	UBA1205	UBA1205	ASV_ASV67	0.595478
1236708F1225717	15C_tarta	M	080-090	Elderly (71-100)	Curieuse	15.02.2020	Bacteria	Bacillota_A	Clostridia	Oscillospirales	Ruminococcaceae	HUN007	HUN007	ASV_ASV729	0.59518
1236666F1225675	27C_tarta	M	080-090	Elderly (71-100)	Curieuse	16.02.2020	Bacteria	Bacillota_A	Clostridia	Clostridiales	Clostridiaceae			ASV_ASV101	0.593794
1236701F1225710	2BG_tarta	F	040-050	Adults (26-70)	Botanical Garden	19.02.2020	Bacteria	Bacillota_A	Clostridia	Oscillospirales	Ruminococcaceae	HUN007	HUN007	ASV_ASV43	0.592974
1236665F1225674	23C_tarta	M	100 +	Centenarians (101+)	Curieuse	16.02.2020	Bacteria	Bacteroidota	Bacteroidia	Bacteroidales	WCHB1-69	UBA1205	UBA1205	ASV_ASV67	0.592817
1236685F1225694	16F_tarta	M	080-090	Elderly (71-100)	Botanical Garden	2022	Bacteria	Bacteroidota	Bacteroidia	Bacteroidales				ASV_ASV4	0.59266
1236667F1225676	29C_tarta	M	100 +	Centenarians (101+)	Curieuse	17.02.2020	Bacteria	Bacillota_A	Clostridia	Peptostreptococcales	Filifactoraceae	Proteocatella	Proteocatella	ASV_ASV199	0.592404
1236696F1225705	20C_tarta	F	040-050	Adults (26-70)	Curieuse	16.02.2020	Bacteria	Chloroflexota	Anaerolineae	Anaerolineales	Anaerolineaceae	Flexilinea	Flexilinea	ASV_ASV186	0.592373
1236705F1225714	6BG_tarta	M	040-050	Adults (26-70)	Botanical Garden	19.02.2020	Bacteria	Bacillota_A	Clostridia	Clostridiales	Clostridiaceae	Sarcina	Sarcina	ASV_ASV253	0.592357
1236705F1225714	6BG_tarta	M	040-050	Adults (26-70)	Botanical Garden	19.02.2020	Bacteria	Bacteroidota	Bacteroidia	Bacteroidales	Bacteroidaceae			ASV_ASV60	0.592357
1236687F1225696	18F_tarta	F	040-050	Adults (26-70)	Botanical Garden	2022	Bacteria	Bacteroidota	Bacteroidia	Bacteroidales	WCHB1-69	UBA5429	UBA5429	ASV_ASV18	0.591404
1236680F1225689	4N_tarta	Not determined	2	Juveniles (2-25)	Curieuse (Nursery)	17.02.2020	Bacteria	Bacillota	Bacilli					ASV_ASV79	0.591398
1236699F1225708	31C_tarta	Not determined	004-005	Juveniles (2-25)	Curieuse (Nursery)	17.02.2020	Bacteria	Bacillota_A	Clostridia	Christensenellales	UBA1242	UBA11490	UBA11490	ASV_ASV793	0.591299
1236668F1225677	22F_tarta	M	080-090	Elderly (71-100)	Curieuse	2022	Bacteria	Bacillota	Bacilli	Bacillales	DSM-1321	Bacillus_AD	Bacillus_AD	ASV_ASV35	0.591039
1236658F1225667	24C_tarta	F	030-040	Adults (26-70)	Curieuse	16.02.2020	Bacteria							ASV_ASV24	0.591001
1236677F1225686	1N_tarta	Not determined	001-002	Juveniles (2-25)	Curieuse (Nursery)	17.02.2020	Bacteria	Bacillota	Bacilli	Bacillales	DSM-18226	Bacillus_BD	Bacillus_BD	ASV_ASV1403	0.590418
1236681F1225690	24F_tarta	M	030-040	Adults (26-70)	Curieuse	2022	Bacteria	Bacteroidota	Bacteroidia	Bacteroidales	WCHB1-69	UBA1205	UBA1205	ASV_ASV67	0.590399
1236684F1225693	27_tarta	Not determined	001-002	Juveniles (2-25)	Curieuse (Nursery)	2022	Bacteria	Bacillota_A	Clostridia	Lachnospirales	Cellulosilyticaceae	Cellulosilyticum	Cellulosilyticum	ASV_ASV50	0.589853
1236670F1225679	4Na_tarta	Not determined	002-003	Juveniles (2-25)	Curieuse (Nursery)	17.02.2020	Bacteria	Pseudomonadota	Gammaproteobacteria	Pseudomonadales	Moraxellaceae	Acinetobacter	Acinetobacter	ASV_ASV539	0.588736
1236686F1225695	17F_tarta	M	080-090	Elderly (71-100)	Botanical Garden	2022	Bacteria	Bacillota_A	Clostridia	Clostridiales	Caloramatoraceae			ASV_ASV911	0.588512
1236700F1225709	1BG_tarta	F	030-040	Adults (26-70)	Botanical Garden	19.02.2020	Bacteria	Bacillota_A	Clostridia	Lachnospirales	Lachnospiraceae			ASV_ASV131	0.588508
1236704F1225713	5BG_tarta	M	080-090	Elderly (71-100)	Botanical Garden	19.02.2020	Bacteria	Fibrobacterota	Chitinivibrionia	Chitinivibrionales	Chitinispirillaceae	JAAYPC01	JAAYPC01	ASV_ASV39	0.588065
1236704F1225713	5BG_tarta	M	080-090	Elderly (71-100)	Botanical Garden	19.02.2020	Bacteria	Bacillota	Bacilli	RFN20	CAG-826	UBA1424	UBA1424	ASV_ASV847	0.588065
1236687F1225696	18F_tarta	F	040-050	Adults (26-70)	Botanical Garden	2022	Bacteria	Bacteroidota	Bacteroidia	Bacteroidales	UBA932			ASV_ASV56	0.587354
1236687F1225696	18F_tarta	F	040-050	Adults (26-70)	Botanical Garden	2022	Bacteria	Bacillota_A	Clostridia	Lachnospirales	Lachnospiraceae			ASV_ASV624	0.587354
1236692F1225701	7_tarta	F	015 -	Juveniles (2-25)	Parco Natura Viva	21.06.2021	RS_GCF_001729965.1~NZ_JRWK01000030.1 Archaea	Methanobacteriota	Methanobacteria	Methanobacteriales	Methanobacteriaceae	Methanosphaera	Methanosphaera sp001729965 [location=1..1480] [ssu_len=1480] [contig_len=1498]	ASV_ASV864	0.587071
1236701F1225710	2BG_tarta	F	040-050	Adults (26-70)	Botanical Garden	19.02.2020	Bacteria	Bacillota_A	Clostridia	Peptostreptococcales	Anaerovoracaceae			ASV_ASV70	0.586985
1236707F1225716	8BG_tarta	M	100 +	Centenarians (101+)	Botanical Garden	19.02.2020	Bacteria	Bacillota_A	Clostridia	Clostridiales	Clostridiaceae	Clostridium	Clostridium	ASV_ASV749	0.586836
1236673F1225682	n6_tarta	M	070-080	Elderly (71-100)	Curieuse	14.02.2020	Bacteria	Bacteroidota	Bacteroidia	Bacteroidales				ASV_ASV77	0.586641
1236658F1225667	24C_tarta	F	030-040	Adults (26-70)	Curieuse	16.02.2020								ASV_ASV107	0.586523
1236671F1225680	ROGER_tarta	M	100 +	Centenarians (101+)	Parco Natura Viva	21.06.2021	Bacteria	Bacillota_A	Clostridia	Lachnospirales	Lachnospiraceae			ASV_ASV151	0.585931
1236704F1225713	5BG_tarta	M	080-090	Elderly (71-100)	Botanical Garden	19.02.2020								ASV_ASV34	0.585655
1236663F1225672	19N_tarta	Not determined	004-005	Juveniles (2-25)	Curieuse (Nursery)	15.02.2020	Bacteria	Bacillota_A	Clostridia	Lachnospirales	Lachnospiraceae			ASV_ASV25	0.585606
1236681F1225690	24F_tarta	M	030-040	Adults (26-70)	Curieuse	2022	Bacteria	Bacillota_A	Clostridia	Christensenellales	UBA1242	UBA7868	UBA7868	ASV_ASV321	0.585395
1236700F1225709	1BG_tarta	F	030-040	Adults (26-70)	Botanical Garden	19.02.2020	Bacteria	Bacillota_A	Clostridia	Clostridiales	Clostridiaceae			ASV_ASV140	0.584941
1236689F1225698	29F_tarta	Not determined	004-005	Juveniles (2-25)	Private Garden	2022	Bacteria	Bacillota_A	Clostridia	Clostridiales	Clostridiaceae			ASV_ASV185	0.584856
1236684F1225693	27_tarta	Not determined	001-002	Juveniles (2-25)	Curieuse (Nursery)	2022	Bacteria	Bacteroidota	Bacteroidia	Bacteroidales	WCHB1-69	UBA5429	UBA5429	ASV_ASV23	0.584854
1236701F1225710	2BG_tarta	F	040-050	Adults (26-70)	Botanical Garden	19.02.2020	Bacteria	Bacteroidota	Bacteroidia	Bacteroidales	Bacteroidaceae	43-108	43-108	ASV_ASV53	0.58399
1236683F1225692	26_tarta	Not determined	001-002	Juveniles (2-25)	Curieuse (Nursery)	2022	Bacteria	Bacillota	Bacilli	Bacillales	DSM-1321	Bacillus_AD	Bacillus_AD	ASV_ASV71	0.583927
1236674F1225683	n8_tarta	Not determined	004-005	Juveniles (2-25)	Curieuse (Nursery)	14.02.2020	Bacteria	Verrucomicrobiota	Verrucomicrobiae	Verrucomicrobiales				ASV_ASV80	0.582765
1236673F1225682	n6_tarta	M	070-080	Elderly (71-100)	Curieuse	14.02.2020	Bacteria	Bacillota_A	Clostridia	Lachnospirales	Lachnospiraceae			ASV_ASV188	0.582595
1236702F1225711	3BG_tarta	F	030-040	Adults (26-70)	Botanical Garden	19.02.2020	Bacteria	Bacteroidota	Bacteroidia	Bacteroidales	UBA932	Bact-08	Bact-08	ASV_ASV169	0.582512
1236658F1225667	24C_tarta	F	030-040	Adults (26-70)	Curieuse	16.02.2020	Bacteria	Chloroflexota	Anaerolineae	Anaerolineales	Anaerolineaceae	Flexilinea	Flexilinea	ASV_ASV186	0.582046
1236668F1225677	22F_tarta	M	080-090	Elderly (71-100)	Curieuse	2022	Bacteria	Bacillota_A	Clostridia	Clostridiales	Clostridiaceae			ASV_ASV101	0.580389
1236668F1225677	22F_tarta	M	080-090	Elderly (71-100)	Curieuse	2022	Bacteria	Bacillota_A	Clostridia	TANB77	CAG-508			ASV_ASV289	0.580389
1236657F1225666	�	F	030-040	Adults (26-70)	Curieuse	14.02.2020	Bacteria	Bacillota_A	Clostridia	Clostridiales	Clostridiaceae	Clostridium	Clostridium	ASV_ASV44	0.58025
1236687F1225696	18F_tarta	F	040-050	Adults (26-70)	Botanical Garden	2022	Bacteria	Bacillota_A	Clostridia	Oscillospirales	Ruminococcaceae			ASV_ASV571	0.579252
1236707F1225716	8BG_tarta	M	100 +	Centenarians (101+)	Botanical Garden	19.02.2020	Bacteria	Bacillota_A	Clostridia	Clostridiales	Clostridiaceae	Clostridium	Clostridium	ASV_ASV113	0.578906
1236676F1225685	n10_tarta	M	090-100	Elderly (71-100)	Curieuse	15.02.2020	Bacteria	Bacillota_A	Clostridia	Oscillospirales	Acutalibacteraceae	UMGS263	UMGS263	ASV_ASV1506	0.578035
1236675F1225684	n9_tarta	M	070-080	Elderly (71-100)	Curieuse	15.02.2020	Bacteria	Bacillota_A	Clostridia	Oscillospirales	Oscillospiraceae			ASV_ASV235	0.578018
1236681F1225690	24F_tarta	M	030-040	Adults (26-70)	Curieuse	2022	Bacteria	Bacillota_A	Clostridia	Lachnospirales	Lachnospiraceae			ASV_ASV28	0.57789
1236689F1225698	29F_tarta	Not determined	004-005	Juveniles (2-25)	Private Garden	2022	Bacteria							ASV_ASV912	0.577126
1236672F1225681	10BG_tarta	M	040-050	Adults (26-70)	Botanical Garden	19.02.2020	Bacteria	Bacillota_A	Clostridia	Clostridiales	Clostridiaceae	Clostridium	Clostridium	ASV_ASV8	0.576427
1236685F1225694	16F_tarta	M	080-090	Elderly (71-100)	Botanical Garden	2022	Bacteria	Bacteroidota	Bacteroidia					ASV_ASV536	0.576403
1236666F1225675	27C_tarta	M	080-090	Elderly (71-100)	Curieuse	16.02.2020	Bacteria	Bacillota_A	Clostridia	Clostridiales	Clostridiaceae	Clostridium	Clostridium	ASV_ASV81	0.57633
1236699F1225708	31C_tarta	Not determined	004-005	Juveniles (2-25)	Curieuse (Nursery)	17.02.2020	Bacteria	Bacillota	Bacilli	Acholeplasmatales	Anaeroplasmataceae			ASV_ASV236	0.57598
1236696F1225705	20C_tarta	F	040-050	Adults (26-70)	Curieuse	16.02.2020	Bacteria	Bacillota_A	Clostridia	Oscillospirales	Ruminococcaceae	HUN007	HUN007	ASV_ASV16	0.575918
1236691F1225700	31F_tarta	Not determined	004-005	Juveniles (2-25)	Private Garden	2022	Bacteria	Bacillota	Bacilli	Bacillales	Planococcaceae	Lysinibacillus	Lysinibacillus	ASV_ASV464	0.57584
1236701F1225710	2BG_tarta	F	040-050	Adults (26-70)	Botanical Garden	19.02.2020	Bacteria	Bacillota_A	Clostridia	Lachnospirales	Lachnospiraceae			ASV_ASV131	0.575005
1236701F1225710	2BG_tarta	F	040-050	Adults (26-70)	Botanical Garden	19.02.2020	Bacteria	Bacteroidota	Bacteroidia	Bacteroidales	WCHB1-69	UBA5429	UBA5429	ASV_ASV132	0.575005
1236707F1225716	8BG_tarta	M	100 +	Centenarians (101+)	Botanical Garden	19.02.2020	Bacteria	Bacillota_A	Clostridia	Peptostreptococcales	Peptostreptococcaceae			ASV_ASV98	0.574941
1236709F1225718	BULBO_tarta	M	100 +	Centenarians (101+)	Parco Natura Viva	21.06.2021	Bacteria	Bacillota_A	Clostridia	Lachnospirales	Lachnospiraceae			ASV_ASV123	0.574746
1236690F1225699	30F_tarta	Not determined	004-005	Juveniles (2-25)	Private Garden	2022	Bacteria	Bacillota_A	Clostridia	Clostridiales	Clostridiaceae	Clostridium	Clostridium	ASV_ASV36	0.574636
1236674F1225683	n8_tarta	Not determined	004-005	Juveniles (2-25)	Curieuse (Nursery)	14.02.2020	Bacteria	Bacillota_A	Clostridia	Oscillospirales	Ruminococcaceae			ASV_ASV562	0.574499
1236666F1225675	27C_tarta	M	080-090	Elderly (71-100)	Curieuse	16.02.2020	Bacteria	Bacillota_A	Clostridia	Oscillospirales	Acutalibacteraceae			ASV_ASV158	0.574389
1236691F1225700	31F_tarta	Not determined	004-005	Juveniles (2-25)	Private Garden	2022	Bacteria	Bacillota_A	Clostridia	Clostridiales	Clostridiaceae	Clostridium	Clostridium	ASV_ASV111	0.573708
1236663F1225672	19N_tarta	Not determined	004-005	Juveniles (2-25)	Curieuse (Nursery)	15.02.2020	Bacteria	Bacillota_A	Clostridia	Clostridiales	Clostridiaceae	Clostridium	Clostridium	ASV_ASV168	0.572764
1236664F1225673	12GH_tarta (=20C)	F	040-050	Adults (26-70)	Curieuse	15.02.2020	Bacteria	Bacillota_A	Clostridia	Oscillospirales	CAG-272	UBA1248	UBA1248	ASV_ASV409	0.572722
1236697F1225706	21C_tarta	M	080-090	Elderly (71-100)	Curieuse	16.02.2020	Bacteria	Bacillota_A	Clostridia	Clostridiales	Clostridiaceae	Clostridium	Clostridium	ASV_ASV36	0.572443
1236688F1225697	19F_tarta	F	005-006	Juveniles (2-25)	Botanical Garden	2022	Bacteria	Bacteroidota	Bacteroidia	Bacteroidales	Bacteroidaceae	Prevotella	Prevotella	ASV_ASV721	0.572272
1236701F1225710	2BG_tarta	F	040-050	Adults (26-70)	Botanical Garden	19.02.2020	Bacteria	Bacillota	Bacilli	Bacillales	DSM-1321	Bacillus_AD	Bacillus_AD	ASV_ASV6	0.57201
1236689F1225698	29F_tarta	Not determined	004-005	Juveniles (2-25)	Private Garden	2022	Bacteria	Bacillota_A	Clostridia	Clostridiales	Clostridiaceae	Sarcina	Sarcina	ASV_ASV154	0.571973
1236695F1225704	11_tarta	F	015 -	Juveniles (2-25)	Parco Natura Viva	21.06.2021	Bacteria	Bacillota_A	Clostridia	Clostridiales	Clostridiaceae	Clostridium	Clostridium	ASV_ASV92	0.571507
1236662F1225671	n2_tarta	M	070-080	Elderly (71-100)	Curieuse	14.02.2020	Bacteria	Planctomycetota	Planctomycetia	Pirellulales	Thermoguttaceae	JADLEL01	JADLEL01	ASV_ASV157	0.571501
1236682F1225691	25F_tarta	Not determined	005 -	Juveniles (2-25)	Curieuse (Nursery)	2022	Bacteria	Bacillota_A	Clostridia	Lachnospirales	Lachnospiraceae	Velocimicrobium	Velocimicrobium	ASV_ASV167	0.570549
1236684F1225693	27_tarta	Not determined	001-002	Juveniles (2-25)	Curieuse (Nursery)	2022	Bacteria	Bacillota_A	Clostridia	Lachnospirales	Lachnospiraceae			ASV_ASV153	0.569858
1236684F1225693	27_tarta	Not determined	001-002	Juveniles (2-25)	Curieuse (Nursery)	2022	Bacteria	Bacillota_A	Clostridia	Lachnospirales	Lachnospiraceae	Velocimicrobium	Velocimicrobium	ASV_ASV309	0.569858
1236684F1225693	27_tarta	Not determined	001-002	Juveniles (2-25)	Curieuse (Nursery)	2022	Bacteria	Verrucomicrobiota	Verrucomicrobiae	Verrucomicrobiales				ASV_ASV80	0.569858
1236699F1225708	31C_tarta	Not determined	004-005	Juveniles (2-25)	Curieuse (Nursery)	17.02.2020	Bacteria	Bacillota_A	Clostridia	Lachnospirales	Lachnospiraceae			ASV_ASV106	0.569853
1236708F1225717	15C_tarta	M	080-090	Elderly (71-100)	Curieuse	15.02.2020	Bacteria	Bacteroidota	Bacteroidia	Bacteroidales	UBA932	Bact-08	Bact-08	ASV_ASV22	0.569812
1236671F1225680	ROGER_tarta	M	100 +	Centenarians (101+)	Parco Natura Viva	21.06.2021	Bacteria	Bacillota_A	Clostridia	Clostridiales	Clostridiaceae	Sarcina	Sarcina	ASV_ASV194	0.569472
1236683F1225692	26_tarta	Not determined	001-002	Juveniles (2-25)	Curieuse (Nursery)	2022								ASV_ASV47	0.569082
1236701F1225710	2BG_tarta	F	040-050	Adults (26-70)	Botanical Garden	19.02.2020	Bacteria	Bacillota_A	Clostridia	Lachnospirales	Lachnospiraceae	Velocimicrobium	Velocimicrobium	ASV_ASV40	0.569016
1236709F1225718	BULBO_tarta	M	100 +	Centenarians (101+)	Parco Natura Viva	21.06.2021	Bacteria	Bacillota_A	Clostridia	Peptostreptococcales	Peptostreptococcaceae			ASV_ASV58	0.56894
1236667F1225676	29C_tarta	M	100 +	Centenarians (101+)	Curieuse	17.02.2020	Bacteria	Fibrobacterota	Fibrobacteria	Fibrobacterales	Fibrobacteraceae			ASV_ASV138	0.568708
1236693F1225702	8_tarta	F	100 +	Centenarians (101+)	Parco Natura Viva	21.06.2021	Bacteria	Bacillota_A	Clostridia	Clostridiales	Clostridiaceae	Inconstantimicrobium	Inconstantimicrobium	ASV_ASV38	0.567988
1236681F1225690	24F_tarta	M	030-040	Adults (26-70)	Curieuse	2022	Bacteria	Bacillota_A	Clostridia	Clostridiales	Clostridiaceae	Clostridium	Clostridium	ASV_ASV175	0.567883
1236696F1225705	20C_tarta	F	040-050	Adults (26-70)	Curieuse	16.02.2020	Bacteria	Bacillota_A	Clostridia	Lachnospirales	Cellulosilyticaceae	Cellulosilyticum	Cellulosilyticum	ASV_ASV50	0.567691
1236680F1225689	4N_tarta	Not determined	2	Juveniles (2-25)	Curieuse (Nursery)	17.02.2020	Bacteria	Pseudomonadota	Gammaproteobacteria	Pseudomonadales	Pseudomonadaceae			ASV_ASV522	0.567503
1236691F1225700	31F_tarta	Not determined	004-005	Juveniles (2-25)	Private Garden	2022	Bacteria	Bacillota_A	Clostridia	Clostridiales	Clostridiaceae	Clostridium	Clostridium	ASV_ASV64	0.567309
1236657F1225666	�	F	030-040	Adults (26-70)	Curieuse	14.02.2020	Bacteria	Spirochaetota	Spirochaetia	Treponematales	Treponemataceae	Treponema_C	Treponema_C	ASV_ASV15	0.567123
1236668F1225677	22F_tarta	M	080-090	Elderly (71-100)	Curieuse	2022	Bacteria	Chloroflexota	Anaerolineae	Anaerolineales	Anaerolineaceae	Flexilinea	Flexilinea	ASV_ASV180	0.567078
1236692F1225701	7_tarta	F	015 -	Juveniles (2-25)	Parco Natura Viva	21.06.2021	Bacteria	Bacillota_A	Clostridia	Clostridiales	Clostridiaceae	Clostridium	Clostridium	ASV_ASV36	0.566943
1236666F1225675	27C_tarta	M	080-090	Elderly (71-100)	Curieuse	16.02.2020	Bacteria	Bacillota	Bacilli	Bacillales	DSM-1321	Pradoshia	Pradoshia	ASV_ASV144	0.566627
1236697F1225706	21C_tarta	M	080-090	Elderly (71-100)	Curieuse	16.02.2020	Bacteria	Bacteroidota	Bacteroidia	Bacteroidales	WCHB1-69	UBA1205	UBA1205	ASV_ASV67	0.566321
1236675F1225684	n9_tarta	M	070-080	Elderly (71-100)	Curieuse	15.02.2020	Bacteria	Bacillota_A	Clostridia	Lachnospirales	Lachnospiraceae	Fimousia	Fimousia	ASV_ASV189	0.566161
1236664F1225673	12GH_tarta (=20C)	F	040-050	Adults (26-70)	Curieuse	15.02.2020	Bacteria	Bacillota_A	Clostridia	TANB77	CAG-508	Scatovivens	Scatovivens	ASV_ASV374	0.565794
1236663F1225672	19N_tarta	Not determined	004-005	Juveniles (2-25)	Curieuse (Nursery)	15.02.2020	Bacteria	Bacillota_A	Clostridia	Oscillospirales				ASV_ASV761	0.565059
1236698F1225707	22C_tarta	M	090-100	Elderly (71-100)	Curieuse	16.02.2020	Bacteria	Bacillota_A	Clostridia	Clostridiales	Clostridiaceae	Clostridium	Clostridium	ASV_ASV81	0.564877
1236666F1225675	27C_tarta	M	080-090	Elderly (71-100)	Curieuse	16.02.2020	Bacteria	Bacteroidota	Bacteroidia	Bacteroidales	ZOR0009	Acetobacteroides	Acetobacteroides	ASV_ASV244	0.564687
1236685F1225694	16F_tarta	M	080-090	Elderly (71-100)	Botanical Garden	2022	Bacteria	Spirochaetota	Spirochaetia	Treponematales	UBA12059	SZUA-370	SZUA-370	ASV_ASV95	0.564579
1236670F1225679	4Na_tarta	Not determined	002-003	Juveniles (2-25)	Curieuse (Nursery)	17.02.2020	Bacteria	Pseudomonadota	Gammaproteobacteria	Pseudomonadales	Pseudomonadaceae	Pseudomonas_E	Pseudomonas_E	ASV_ASV713	0.564112
1236659F1225668	28C_tarta	M	080-090	Elderly (71-100)	Curieuse	16.02.2020	Bacteria	Bacteroidota	Bacteroidia	Bacteroidales	ZOR0009	Acetobacteroides	Acetobacteroides	ASV_ASV352	0.563278
1236687F1225696	18F_tarta	F	040-050	Adults (26-70)	Botanical Garden	2022	Bacteria	Bacillota_A	Clostridia	Lachnospirales				ASV_ASV19	0.563049
1236681F1225690	24F_tarta	M	030-040	Adults (26-70)	Curieuse	2022	Bacteria	Bacteroidota	Bacteroidia	Bacteroidales	UBA932			ASV_ASV37	0.56288
1236661F1225670	9BG_tarta	M	090-100	Elderly (71-100)	Botanical Garden	18.02.2020	Bacteria	Bacillota_A	Clostridia	TANB77	CAG-508	Scatovivens	Scatovivens	ASV_ASV220	0.56266
1236657F1225666	�	F	030-040	Adults (26-70)	Curieuse	14.02.2020	Bacteria	Bacillota_A	Clostridia	Lachnospirales	Lachnospiraceae			ASV_ASV227	0.561872
1236690F1225699	30F_tarta	Not determined	004-005	Juveniles (2-25)	Private Garden	2022	Bacteria	Bacillota	Bacilli	Bacillales	Planococcaceae	Solibacillus	Solibacillus	ASV_ASV1010	0.561272
1236681F1225690	24F_tarta	M	030-040	Adults (26-70)	Curieuse	2022	Bacteria	Bacillota_A	Clostridia	Lachnospirales	Lachnospiraceae			ASV_ASV108	0.560378
1236675F1225684	n9_tarta	M	070-080	Elderly (71-100)	Curieuse	15.02.2020	Bacteria	Bacillota_A	Clostridia	Oscillospirales	Acutalibacteraceae	Yeguia	Yeguia	ASV_ASV519	0.560232
1236684F1225693	27_tarta	Not determined	001-002	Juveniles (2-25)	Curieuse (Nursery)	2022								ASV_ASV47	0.55986
1236696F1225705	20C_tarta	F	040-050	Adults (26-70)	Curieuse	16.02.2020								ASV_ASV52	0.559464
1236661F1225670	9BG_tarta	M	090-100	Elderly (71-100)	Botanical Garden	18.02.2020	Bacteria	Bacillota_A	Clostridia	Clostridiales	Clostridiaceae	Clostridium	Clostridium	ASV_ASV9	0.55925
1236707F1225716	8BG_tarta	M	100 +	Centenarians (101+)	Botanical Garden	19.02.2020	Bacteria	Bacillota_A	Clostridia	Clostridiales	Clostridiaceae			ASV_ASV101	0.55908
1236672F1225681	10BG_tarta	M	040-050	Adults (26-70)	Botanical Garden	19.02.2020	Bacteria	Bacillota_A	Clostridia	Clostridiales	Clostridiaceae			ASV_ASV101	0.559048
1236659F1225668	28C_tarta	M	080-090	Elderly (71-100)	Curieuse	16.02.2020	Bacteria	Bacillota_A	Clostridia	Oscillospirales	Ruminococcaceae	HUN007	HUN007	ASV_ASV43	0.559027
1236687F1225696	18F_tarta	F	040-050	Adults (26-70)	Botanical Garden	2022	Bacteria	Bacillota_A	Clostridia	Clostridiales	Clostridiaceae	Clostridium	Clostridium	ASV_ASV113	0.558999
1236687F1225696	18F_tarta	F	040-050	Adults (26-70)	Botanical Garden	2022	Bacteria	Bacillota_A	Clostridia	Lachnospirales	Lachnospiraceae			ASV_ASV14	0.558999
1236698F1225707	22C_tarta	M	090-100	Elderly (71-100)	Curieuse	16.02.2020	Bacteria	Bacteroidota	Bacteroidia	Bacteroidales	WCHB1-69	UBA1205	UBA1205	ASV_ASV67	0.558192
1236708F1225717	15C_tarta	M	080-090	Elderly (71-100)	Curieuse	15.02.2020	Bacteria	Bacteroidota	Bacteroidia	Bacteroidales	UBA932	Bact-08	Bact-08	ASV_ASV54	0.558103
1236692F1225701	7_tarta	F	015 -	Juveniles (2-25)	Parco Natura Viva	21.06.2021	Bacteria	Bacillota_A	Clostridia	Clostridiales	Clostridiaceae	Clostridium	Clostridium	ASV_ASV68	0.556879
1236683F1225692	26_tarta	Not determined	001-002	Juveniles (2-25)	Curieuse (Nursery)	2022								ASV_ASV51	0.55671
1236677F1225686	1N_tarta	Not determined	001-002	Juveniles (2-25)	Curieuse (Nursery)	17.02.2020	Bacteria	Bacillota_A	Clostridia	Lachnospirales	Lachnospiraceae			ASV_ASV2	0.55668
1236657F1225666	�	F	030-040	Adults (26-70)	Curieuse	14.02.2020	Bacteria	Bacillota_A	Clostridia	Oscillospirales	Ruminococcaceae	Anaerofilum	Anaerofilum	ASV_ASV109	0.55662
1236700F1225709	1BG_tarta	F	030-040	Adults (26-70)	Botanical Garden	19.02.2020	Bacteria	Bacillota_A	Clostridia	Clostridiales	Clostridiaceae	Inconstantimicrobium	Inconstantimicrobium	ASV_ASV38	0.556408
1236682F1225691	25F_tarta	Not determined	005 -	Juveniles (2-25)	Curieuse (Nursery)	2022	Bacteria	Bacillota	Bacilli	Bacillales	DSM-1321	Bacillus_AD	Bacillus_AD	ASV_ASV165	0.556345
1236680F1225689	4N_tarta	Not determined	2	Juveniles (2-25)	Curieuse (Nursery)	17.02.2020	Bacteria	Bacillota_A	Clostridia	Lachnospirales	Lachnospiraceae			ASV_ASV110	0.555556
1236679F1225688	3N_tarta	Not determined	002-003	Juveniles (2-25)	Curieuse (Nursery)	17.02.2020	Bacteria	Bacillota	Bacilli	Acholeplasmatales	Anaeroplasmataceae			ASV_ASV236	0.555322
1236658F1225667	24C_tarta	F	030-040	Adults (26-70)	Curieuse	16.02.2020	Bacteria	Bacillota_A	Clostridia	Peptostreptococcales	Peptostreptococcaceae	Terrisporobacter	Terrisporobacter	ASV_ASV10	0.555182
1236705F1225714	6BG_tarta	M	040-050	Adults (26-70)	Botanical Garden	19.02.2020	Bacteria	Bacteroidota	Bacteroidia	Bacteroidales				ASV_ASV181	0.555123
1236662F1225671	n2_tarta	M	070-080	Elderly (71-100)	Curieuse	14.02.2020	Bacteria	Bacillota_A	Clostridia	Clostridiales	Clostridiaceae	Clostridium	Clostridium	ASV_ASV36	0.554568
1236669F1225678	17C_tarta	M	060-070	Adults (26-70)	Curieuse	15.02.2020	RS_GCF_001729965.1~NZ_JRWK01000030.1 Archaea	Methanobacteriota	Methanobacteria	Methanobacteriales	Methanobacteriaceae	Methanosphaera	Methanosphaera sp001729965 [location=1..1480] [ssu_len=1480] [contig_len=1498]	ASV_ASV41	0.554099
1236660F1225669	30C_tarta	M	090-100	Elderly (71-100)	Curieuse	17.02.2020	Bacteria	Bacillota_A	Clostridia	Peptostreptococcales	Peptostreptococcaceae			ASV_ASV58	0.554004
1236692F1225701	7_tarta	F	015 -	Juveniles (2-25)	Parco Natura Viva	21.06.2021	Bacteria	Bacillota_A	Clostridia	Clostridiales	Clostridiaceae	Clostridium	Clostridium	ASV_ASV74	0.553524
1236672F1225681	10BG_tarta	M	040-050	Adults (26-70)	Botanical Garden	19.02.2020	Bacteria	Bacillota_A	Clostridia	Peptostreptococcales	Peptostreptococcaceae	Terrisporobacter	Terrisporobacter	ASV_ASV10	0.553254
1236685F1225694	16F_tarta	M	080-090	Elderly (71-100)	Botanical Garden	2022	Bacteria	Bacteroidota	Bacteroidia	Bacteroidales	UBA932			ASV_ASV183	0.552756
1236661F1225670	9BG_tarta	M	090-100	Elderly (71-100)	Botanical Garden	18.02.2020	Bacteria	Bacillota_A	Clostridia	Peptostreptococcales	Peptostreptococcaceae			ASV_ASV98	0.55243
1236691F1225700	31F_tarta	Not determined	004-005	Juveniles (2-25)	Private Garden	2022	Bacteria	Myxococcota	Myxococcia	Myxococcales	Myxococcaceae	Myxococcus	Myxococcus	ASV_ASV815	0.55238
1236682F1225691	25F_tarta	Not determined	005 -	Juveniles (2-25)	Curieuse (Nursery)	2022	Bacteria	Bacillota	Bacilli	Bacillales	DSM-1321	Bacillus_AD	Bacillus_AD	ASV_ASV427	0.55161
1236667F1225676	29C_tarta	M	100 +	Centenarians (101+)	Curieuse	17.02.2020	Bacteria	Bacillota_A	Clostridia	TANB77	CAG-465	CAG-465	CAG-465	ASV_ASV372	0.551475
1236666F1225675	27C_tarta	M	080-090	Elderly (71-100)	Curieuse	16.02.2020	Bacteria	Bacteroidota	Bacteroidia	Bacteroidales	WCHB1-69	UBA1205	UBA1205	ASV_ASV67	0.551103
1236697F1225706	21C_tarta	M	080-090	Elderly (71-100)	Curieuse	16.02.2020	Bacteria	Bacillota_A	Clostridia	Clostridiales	Clostridiaceae	Clostridium	Clostridium	ASV_ASV20	0.551015
1236706F1225715	7BG_tarta	F	050-060	Adults (26-70)	Botanical Garden	19.02.2020	Bacteria	Bacillota_A	Clostridia	Oscillospirales	Oscillospiraceae	UBA1774	UBA1774	ASV_ASV62	0.550722
1236691F1225700	31F_tarta	Not determined	004-005	Juveniles (2-25)	Private Garden	2022	Bacteria	Bacillota_A	Clostridia	Lachnospirales	Lachnospiraceae			ASV_ASV66	0.550247
1236703F1225712	4BG_tarta	M	030-040	Adults (26-70)	Botanical Garden	19.02.2020	Bacteria	Bacillota_A	Clostridia	Lachnospirales	Lachnospiraceae			ASV_ASV616	0.549903
1236674F1225683	n8_tarta	Not determined	004-005	Juveniles (2-25)	Curieuse (Nursery)	14.02.2020	Bacteria	Spirochaetota	GWE2-31-10	GWE2-31-10	GWE2-31-10	RGIG8597	RGIG8597	ASV_ASV114	0.5497
1236664F1225673	12GH_tarta (=20C)	F	040-050	Adults (26-70)	Curieuse	15.02.2020	Bacteria	Bacillota_A	Clostridia	Lachnospirales	Lachnospiraceae			ASV_ASV25	0.549628
1236668F1225677	22F_tarta	M	080-090	Elderly (71-100)	Curieuse	2022	Bacteria	Bacillota_A	Clostridia	Lachnospirales	Lachnospiraceae			ASV_ASV284	0.548441
1236675F1225684	n9_tarta	M	070-080	Elderly (71-100)	Curieuse	15.02.2020	Bacteria							ASV_ASV100	0.548376
1236690F1225699	30F_tarta	Not determined	004-005	Juveniles (2-25)	Private Garden	2022	GB_GCA_015063035.1~SUTG01000016.1 Archaea	Methanobacteriota	Methanobacteria	Methanobacteriales	Methanobacteriaceae	Methanobrevibacter	Methanobrevibacter olleyae_A [location=3458..4930] [ssu_len=1473] [contig_len=37473]	ASV_ASV631	0.547909
1236681F1225690	24F_tarta	M	030-040	Adults (26-70)	Curieuse	2022	Bacteria	Bacillota_A	Clostridia	Christensenellales	CAG-138			ASV_ASV156	0.54787
1236704F1225713	5BG_tarta	M	080-090	Elderly (71-100)	Botanical Garden	19.02.2020	Bacteria	Bacteroidota	Bacteroidia	Bacteroidales	UBA932	Bact-08	Bact-08	ASV_ASV54	0.547093
1236687F1225696	18F_tarta	F	040-050	Adults (26-70)	Botanical Garden	2022	Bacteria	Bacteroidota	Bacteroidia	Bacteroidales	UBA932			ASV_ASV183	0.546847
1236676F1225685	n10_tarta	M	090-100	Elderly (71-100)	Curieuse	15.02.2020	Bacteria	Bacillota_A	Clostridia	Lachnospirales	Lachnospiraceae			ASV_ASV14	0.54662
1236658F1225667	24C_tarta	F	030-040	Adults (26-70)	Curieuse	16.02.2020	Bacteria	Bacteroidota	Bacteroidia	Bacteroidales				ASV_ASV574	0.546228
1236673F1225682	n6_tarta	M	070-080	Elderly (71-100)	Curieuse	14.02.2020	Bacteria	Bacillota	Bacilli	Bacillales	DSM-1321	Pradoshia	Pradoshia	ASV_ASV144	0.546183
1236669F1225678	17C_tarta	M	060-070	Adults (26-70)	Curieuse	15.02.2020	Bacteria	Bacillota_A	Clostridia	Clostridiales	Clostridiaceae	Clostridium	Clostridium	ASV_ASV9	0.54599
1236709F1225718	BULBO_tarta	M	100 +	Centenarians (101+)	Parco Natura Viva	21.06.2021	Bacteria	Bacillota_A	Clostridia	Lachnospirales	Lachnospiraceae			ASV_ASV122	0.545718
1236709F1225718	BULBO_tarta	M	100 +	Centenarians (101+)	Parco Natura Viva	21.06.2021	Bacteria	Bacillota_A	Clostridia	Lachnospirales	Lachnospiraceae			ASV_ASV69	0.545718
1236700F1225709	1BG_tarta	F	030-040	Adults (26-70)	Botanical Garden	19.02.2020	Bacteria	Bacteroidota	Bacteroidia	Bacteroidales	UBA932	Bact-08	Bact-08	ASV_ASV22	0.545707
1236677F1225686	1N_tarta	Not determined	001-002	Juveniles (2-25)	Curieuse (Nursery)	17.02.2020	Bacteria	Bacillota	Bacilli	Bacillales	DSM-18226	Bacillus_BD	Bacillus_BD	ASV_ASV1465	0.545434
1236677F1225686	1N_tarta	Not determined	001-002	Juveniles (2-25)	Curieuse (Nursery)	17.02.2020								ASV_ASV52	0.545434
1236693F1225702	8_tarta	F	100 +	Centenarians (101+)	Parco Natura Viva	21.06.2021	Bacteria	Bacillota_A	Clostridia	Lachnospirales	Cellulosilyticaceae	Cellulosilyticum	Cellulosilyticum	ASV_ASV50	0.545269
1236697F1225706	21C_tarta	M	080-090	Elderly (71-100)	Curieuse	16.02.2020	Bacteria	Bacillota_A	Clostridia	TANB77	CAG-508	Scatovivens	Scatovivens	ASV_ASV454	0.544892
1236660F1225669	30C_tarta	M	090-100	Elderly (71-100)	Curieuse	17.02.2020	Bacteria	Bacillota_A	Clostridia	Lachnospirales	Lachnospiraceae			ASV_ASV25	0.544693
1236685F1225694	16F_tarta	M	080-090	Elderly (71-100)	Botanical Garden	2022	Bacteria	Bacillota_A	Clostridia	Clostridiales	Clostridiaceae	Clostridium	Clostridium	ASV_ASV103	0.543888
1236679F1225688	3N_tarta	Not determined	002-003	Juveniles (2-25)	Curieuse (Nursery)	17.02.2020	Bacteria	Bacteroidota	Bacteroidia	Bacteroidales				ASV_ASV351	0.543832
1236671F1225680	ROGER_tarta	M	100 +	Centenarians (101+)	Parco Natura Viva	21.06.2021	Bacteria	Bacillota_A	Clostridia	Clostridiales	Clostridiaceae	Sarcina	Sarcina	ASV_ASV573	0.543138
1236658F1225667	24C_tarta	F	030-040	Adults (26-70)	Curieuse	16.02.2020	Bacteria	Bacillota_A	Clostridia	Lachnospirales	Lachnospiraceae			ASV_ASV48	0.541751
1236693F1225702	8_tarta	F	100 +	Centenarians (101+)	Parco Natura Viva	21.06.2021	Bacteria	Bacillota_A	Clostridia	Lachnospirales	Lachnospiraceae			ASV_ASV123	0.541482
1236693F1225702	8_tarta	F	100 +	Centenarians (101+)	Parco Natura Viva	21.06.2021	Bacteria	Bacteroidota	Bacteroidia	Bacteroidales	WCHB1-69	UBA5429	UBA5429	ASV_ASV125	0.541482
1236674F1225683	n8_tarta	Not determined	004-005	Juveniles (2-25)	Curieuse (Nursery)	14.02.2020	Bacteria	Bacillota_A	Clostridia	Lachnospirales	Lachnospiraceae			ASV_ASV153	0.541434
1236674F1225683	n8_tarta	Not determined	004-005	Juveniles (2-25)	Curieuse (Nursery)	14.02.2020	Bacteria	Bacillota_A	Clostridia	Christensenellales	UBA1242			ASV_ASV198	0.541434
1236685F1225694	16F_tarta	M	080-090	Elderly (71-100)	Botanical Garden	2022	Bacteria	Bacillota_A	Clostridia	Oscillospirales	Ruminococcaceae	HUN007	HUN007	ASV_ASV43	0.540932
1236668F1225677	22F_tarta	M	080-090	Elderly (71-100)	Curieuse	2022	Bacteria	Spirochaetota	Spirochaetia	Treponematales	Treponemataceae			ASV_ASV172	0.540454
1236703F1225712	4BG_tarta	M	030-040	Adults (26-70)	Botanical Garden	19.02.2020	Bacteria	Bacillota_A	Clostridia	Clostridiales	Clostridiaceae			ASV_ASV140	0.540213
1236692F1225701	7_tarta	F	015 -	Juveniles (2-25)	Parco Natura Viva	21.06.2021	Bacteria	Bacillota_A	Clostridia	Lachnospirales	Lachnospiraceae			ASV_ASV283	0.540105
1236666F1225675	27C_tarta	M	080-090	Elderly (71-100)	Curieuse	16.02.2020	Bacteria	Bacillota_A	Clostridia	Lachnospirales	Lachnospiraceae			ASV_ASV255	0.53946
1236683F1225692	26_tarta	Not determined	001-002	Juveniles (2-25)	Curieuse (Nursery)	2022	Bacteria	Bacillota_A	Clostridia	Lachnospirales	Lachnospiraceae			ASV_ASV150	0.53939
1236683F1225692	26_tarta	Not determined	001-002	Juveniles (2-25)	Curieuse (Nursery)	2022	Bacteria	Bacillota_A	Clostridia	Lachnospirales	Lachnospiraceae			ASV_ASV326	0.53939
1236707F1225716	8BG_tarta	M	100 +	Centenarians (101+)	Botanical Garden	19.02.2020	Bacteria	Bacillota_A	Clostridia	Clostridiales	Clostridiaceae	Inconstantimicrobium	Inconstantimicrobium	ASV_ASV38	0.539255
1236699F1225708	31C_tarta	Not determined	004-005	Juveniles (2-25)	Curieuse (Nursery)	17.02.2020	Bacteria	Bacteroidota	Bacteroidia	Bacteroidales	Tannerellaceae			ASV_ASV459	0.539216
1236661F1225670	9BG_tarta	M	090-100	Elderly (71-100)	Botanical Garden	18.02.2020								ASV_ASV107	0.538789
1236682F1225691	25F_tarta	Not determined	005 -	Juveniles (2-25)	Curieuse (Nursery)	2022	Bacteria	Bacillota_A	Clostridia	Clostridiales	Clostridiaceae	Clostridium	Clostridium	ASV_ASV68	0.537405
1236674F1225683	n8_tarta	Not determined	004-005	Juveniles (2-25)	Curieuse (Nursery)	14.02.2020	Bacteria	Synergistota	Synergistia	Synergistales	Synergistaceae	Caccocola	Caccocola	ASV_ASV653	0.537301
1236679F1225688	3N_tarta	Not determined	002-003	Juveniles (2-25)	Curieuse (Nursery)	17.02.2020	Bacteria	Bacillota_A	Clostridia	Peptostreptococcales	Peptostreptococcaceae	Terrisporobacter	Terrisporobacter	ASV_ASV10	0.536172
1236679F1225688	3N_tarta	Not determined	002-003	Juveniles (2-25)	Curieuse (Nursery)	17.02.2020	Bacteria	Bacillota_A	Clostridia	Lachnospirales	Lachnospiraceae			ASV_ASV120	0.536172
1236702F1225711	3BG_tarta	F	030-040	Adults (26-70)	Botanical Garden	19.02.2020	Bacteria	Bacillota_A	Clostridia	TANB77	CAG-508	Scatovivens	Scatovivens	ASV_ASV139	0.53608
1236702F1225711	3BG_tarta	F	030-040	Adults (26-70)	Botanical Garden	19.02.2020	Bacteria	Spirochaetota	Spirochaetia	Treponematales	UBA12059	SZUA-370	SZUA-370	ASV_ASV95	0.53608
1236706F1225715	7BG_tarta	F	050-060	Adults (26-70)	Botanical Garden	19.02.2020	Bacteria	Bacillota_A	Clostridia	Clostridiales	Clostridiaceae			ASV_ASV140	0.535633
1236665F1225674	23C_tarta	M	100 +	Centenarians (101+)	Curieuse	16.02.2020	Bacteria	Bacillota_A	Clostridia	Christensenellales	UBA1242	UBA7584	UBA7584	ASV_ASV311	0.535447
1236660F1225669	30C_tarta	M	090-100	Elderly (71-100)	Curieuse	17.02.2020	Bacteria	Bacteroidota	Bacteroidia	Bacteroidales	ZOR0009	Acetobacteroides	Acetobacteroides	ASV_ASV90	0.535382
1236661F1225670	9BG_tarta	M	090-100	Elderly (71-100)	Botanical Garden	18.02.2020	Bacteria	Bacillota_A	Clostridia	Peptostreptococcales	Peptostreptococcaceae			ASV_ASV58	0.535379
1236688F1225697	19F_tarta	F	005-006	Juveniles (2-25)	Botanical Garden	2022	Bacteria	Bacillota_A	Clostridia	Clostridiales	Clostridiaceae	Clostridium	Clostridium	ASV_ASV749	0.535352
1236705F1225714	6BG_tarta	M	040-050	Adults (26-70)	Botanical Garden	19.02.2020	Bacteria	Spirochaetota	Spirochaetia					ASV_ASV59	0.534814
1236696F1225705	20C_tarta	F	040-050	Adults (26-70)	Curieuse	16.02.2020	Bacteria	Bacillota_A	Clostridia	Oscillospirales	Acutalibacteraceae	Yeguia	Yeguia	ASV_ASV340	0.534781
1236686F1225695	17F_tarta	M	080-090	Elderly (71-100)	Botanical Garden	2022	Bacteria	Bacteroidota	Bacteroidia	Bacteroidales	Bacteroidaceae	Prevotella	Prevotella	ASV_ASV200	0.534705
1236690F1225699	30F_tarta	Not determined	004-005	Juveniles (2-25)	Private Garden	2022	Bacteria	Pseudomonadota	Alphaproteobacteria	Caulobacterales	Caulobacteraceae	Brevundimonas	Brevundimonas	ASV_ASV2078	0.534545
1236667F1225676	29C_tarta	M	100 +	Centenarians (101+)	Curieuse	17.02.2020	Bacteria	Bacteroidota	Bacteroidia	Bacteroidales	Paludibacteraceae	RGIG10190	RGIG10190	ASV_ASV260	0.534241
1236667F1225676	29C_tarta	M	100 +	Centenarians (101+)	Curieuse	17.02.2020	Bacteria	Bacillota	Bacilli	Bacillales	DSM-1321	Bacillus_AD	Bacillus_AD	ASV_ASV6	0.534241
1236702F1225711	3BG_tarta	F	030-040	Adults (26-70)	Botanical Garden	19.02.2020	Bacteria	Bacillota	Bacilli	Acholeplasmatales	UBA5453			ASV_ASV471	0.533969
1236675F1225684	n9_tarta	M	070-080	Elderly (71-100)	Curieuse	15.02.2020	Bacteria	Spirochaetota	Spirochaetia	Treponematales	Treponemataceae			ASV_ASV166	0.533555
1236675F1225684	n9_tarta	M	070-080	Elderly (71-100)	Curieuse	15.02.2020	Bacteria	Bacillota_A	Clostridia	Oscillospirales	Acutalibacteraceae			ASV_ASV379	0.533555
1236674F1225683	n8_tarta	Not determined	004-005	Juveniles (2-25)	Curieuse (Nursery)	14.02.2020	Bacteria	Bacteroidota	Bacteroidia	Bacteroidales	Rikenellaceae			ASV_ASV264	0.533168
1236701F1225710	2BG_tarta	F	040-050	Adults (26-70)	Botanical Garden	19.02.2020	Bacteria	Spirochaetota	Spirochaetia	Treponematales	Treponemataceae			ASV_ASV135	0.533078
1236657F1225666	�	F	030-040	Adults (26-70)	Curieuse	14.02.2020	Bacteria	Bacillota_A	Clostridia	Oscillospirales	Ruminococcaceae	HUN007	HUN007	ASV_ASV43	0.53299
1236708F1225717	15C_tarta	M	080-090	Elderly (71-100)	Curieuse	15.02.2020	Bacteria	Bacteroidota	Bacteroidia	Bacteroidales				ASV_ASV12	0.532735
1236682F1225691	25F_tarta	Not determined	005 -	Juveniles (2-25)	Curieuse (Nursery)	2022	Bacteria	Bacillota_A	Clostridia	Lachnospirales	Lachnospiraceae			ASV_ASV108	0.53267
1236678F1225687	2N_tarta	Not determined	002-003	Juveniles (2-25)	Curieuse (Nursery)	17.02.2020	Bacteria	Bacillota_A	Clostridia	Christensenellales	UBA1242			ASV_ASV198	0.532259
1236680F1225689	4N_tarta	Not determined	2	Juveniles (2-25)	Curieuse (Nursery)	17.02.2020	Bacteria	Pseudomonadota	Alphaproteobacteria	Caulobacterales	Caulobacteraceae	Brevundimonas	Brevundimonas	ASV_ASV470	0.531661
1236686F1225695	17F_tarta	M	080-090	Elderly (71-100)	Botanical Garden	2022	Bacteria	Bacteroidota	Bacteroidia	Bacteroidales				ASV_ASV176	0.531342
1236664F1225673	12GH_tarta (=20C)	F	040-050	Adults (26-70)	Curieuse	15.02.2020	Bacteria	Bacillota	Bacilli	ML615J-28	CAG-313	UMGS75	UMGS75	ASV_ASV117	0.531153
1236664F1225673	12GH_tarta (=20C)	F	040-050	Adults (26-70)	Curieuse	15.02.2020	Bacteria	Bacillota_A	Clostridia	Oscillospirales	Acutalibacteraceae	UMGS1532	UMGS1532	ASV_ASV893	0.531153
1236660F1225669	30C_tarta	M	090-100	Elderly (71-100)	Curieuse	17.02.2020	Bacteria	Spirochaetota	Spirochaetia	Treponematales	Treponemataceae			ASV_ASV211	0.530726
1236687F1225696	18F_tarta	F	040-050	Adults (26-70)	Botanical Garden	2022	Bacteria	Bacillota_A	Clostridia	TANB77	CAG-508			ASV_ASV918	0.530644
1236675F1225684	n9_tarta	M	070-080	Elderly (71-100)	Curieuse	15.02.2020	Bacteria	Bacteroidota	Bacteroidia	Bacteroidales	UBA932	Bact-08	Bact-08	ASV_ASV54	0.53059
1236681F1225690	24F_tarta	M	030-040	Adults (26-70)	Curieuse	2022	Bacteria	Spirochaetota	Spirochaetia	Treponematales	Treponemataceae			ASV_ASV172	0.530358
1236682F1225691	25F_tarta	Not determined	005 -	Juveniles (2-25)	Curieuse (Nursery)	2022								ASV_ASV34	0.530303
1236673F1225682	n6_tarta	M	070-080	Elderly (71-100)	Curieuse	14.02.2020	Bacteria	Bacillota_A	Clostridia	Oscillospirales	Ruminococcaceae	Anaerofilum	Anaerofilum	ASV_ASV109	0.53
1236684F1225693	27_tarta	Not determined	001-002	Juveniles (2-25)	Curieuse (Nursery)	2022	Bacteria	Bacillota_A	Clostridia	Lachnospirales	Lachnospiraceae			ASV_ASV104	0.529868
1236684F1225693	27_tarta	Not determined	001-002	Juveniles (2-25)	Curieuse (Nursery)	2022	Bacteria	Bacillota_A	Clostridia	Lachnospirales	Lachnospiraceae			ASV_ASV120	0.529868
1236668F1225677	22F_tarta	M	080-090	Elderly (71-100)	Curieuse	2022	Bacteria	Bacillota_A	Clostridia	Lachnospirales	Lachnospiraceae			ASV_ASV88	0.529805
1236669F1225678	17C_tarta	M	060-070	Adults (26-70)	Curieuse	15.02.2020	Bacteria	Bacillota_A	Clostridia	Lachnospirales	Lachnospiraceae			ASV_ASV88	0.529773
1236685F1225694	16F_tarta	M	080-090	Elderly (71-100)	Botanical Garden	2022	Bacteria	Bacillota_B	Desulfotomaculia	Desulfotomaculales				ASV_ASV97	0.529108
1236674F1225683	n8_tarta	Not determined	004-005	Juveniles (2-25)	Curieuse (Nursery)	14.02.2020	Bacteria	Bacillota_A	Clostridia	Clostridiales	Clostridiaceae	Clostridium_AA	Clostridium_AA	ASV_ASV99	0.529035
1236677F1225686	1N_tarta	Not determined	001-002	Juveniles (2-25)	Curieuse (Nursery)	17.02.2020	Bacteria	Bacillota	Bacilli	Staphylococcales	Staphylococcaceae	Staphylococcus	Staphylococcus	ASV_ASV27	0.528565
1236658F1225667	24C_tarta	F	030-040	Adults (26-70)	Curieuse	16.02.2020	Bacteria	Bacillota_A	Clostridia	Lachnospirales	Cellulosilyticaceae	Cellulosilyticum	Cellulosilyticum	ASV_ASV50	0.528319
1236670F1225679	4Na_tarta	Not determined	002-003	Juveniles (2-25)	Curieuse (Nursery)	17.02.2020	Bacteria	Bacillota_A	Clostridia	Lachnospirales	Lachnospiraceae			ASV_ASV31	0.528295
1236689F1225698	29F_tarta	Not determined	004-005	Juveniles (2-25)	Private Garden	2022	Bacteria	Bacteroidota	Bacteroidia	Bacteroidales	Bacteroidaceae	Bacteroides_H	Bacteroides_H	ASV_ASV30	0.528174
1236705F1225714	6BG_tarta	M	040-050	Adults (26-70)	Botanical Garden	19.02.2020								ASV_ASV52	0.528044
1236682F1225691	25F_tarta	Not determined	005 -	Juveniles (2-25)	Curieuse (Nursery)	2022	Bacteria	Bacteroidota	Bacteroidia	Bacteroidales	WCHB1-69	UBA5429	UBA5429	ASV_ASV23	0.527936
1236681F1225690	24F_tarta	M	030-040	Adults (26-70)	Curieuse	2022	Bacteria	Bacillota_A	Clostridia	Lachnospirales	Lachnospiraceae			ASV_ASV127	0.527856
1236667F1225676	29C_tarta	M	100 +	Centenarians (101+)	Curieuse	17.02.2020	Bacteria	Bacillota_A	Clostridia	Lachnospirales	Lachnospiraceae			ASV_ASV118	0.527778
1236676F1225685	n10_tarta	M	090-100	Elderly (71-100)	Curieuse	15.02.2020	Bacteria	Bacillota	Bacilli	ML615J-28	CAG-313	UMGS75	UMGS75	ASV_ASV117	0.527771
1236675F1225684	n9_tarta	M	070-080	Elderly (71-100)	Curieuse	15.02.2020								ASV_ASV126	0.527626
1236691F1225700	31F_tarta	Not determined	004-005	Juveniles (2-25)	Private Garden	2022	Bacteria	Bacillota	Bacilli	Paenibacillales				ASV_ASV837	0.526787
1236671F1225680	ROGER_tarta	M	100 +	Centenarians (101+)	Parco Natura Viva	21.06.2021	Bacteria	Bacillota_A	Clostridia	Clostridiales	Clostridiaceae	Clostridium	Clostridium	ASV_ASV92	0.52668
1236685F1225694	16F_tarta	M	080-090	Elderly (71-100)	Botanical Garden	2022	Bacteria	Bacillota_A	Clostridia	Clostridiales	Clostridiaceae	Clostridium	Clostridium	ASV_ASV259	0.526152
1236660F1225669	30C_tarta	M	090-100	Elderly (71-100)	Curieuse	17.02.2020	Bacteria	Bacillota	Bacilli					ASV_ASV79	0.526071
1236670F1225679	4Na_tarta	Not determined	002-003	Juveniles (2-25)	Curieuse (Nursery)	17.02.2020	Bacteria	Bacillota	Bacilli	Bacillales	DSM-1321	Bacillus_AD	Bacillus_AD	ASV_ASV323	0.526057
1236681F1225690	24F_tarta	M	030-040	Adults (26-70)	Curieuse	2022	Bacteria	Bacillota_A	Clostridia	TANB77	CAG-508			ASV_ASV87	0.525355
1236681F1225690	24F_tarta	M	030-040	Adults (26-70)	Curieuse	2022	Bacteria	Bacteroidota	Bacteroidia	Bacteroidales	UBA932			ASV_ASV89	0.525355
1236659F1225668	28C_tarta	M	080-090	Elderly (71-100)	Curieuse	16.02.2020	Bacteria	Campylobacterota	Campylobacteria	Campylobacterales	Campylobacteraceae	Campylobacter	Campylobacter	ASV_ASV149	0.525018
1236659F1225668	28C_tarta	M	080-090	Elderly (71-100)	Curieuse	16.02.2020	Bacteria	Spirochaetota	Spirochaetia	Treponematales	Treponemataceae	Treponema_D	Treponema_D	ASV_ASV514	0.525018
1236662F1225671	n2_tarta	M	070-080	Elderly (71-100)	Curieuse	14.02.2020	Bacteria	Desulfobacterota	Desulfovibrionia	Desulfovibrionales	Desulfovibrionaceae	Desulfovibrio	Desulfovibrio	ASV_ASV1220	0.524934
1236685F1225694	16F_tarta	M	080-090	Elderly (71-100)	Botanical Garden	2022	Bacteria	Bacillota_A	Clostridia	Clostridiales	Clostridiaceae	Clostridium	Clostridium	ASV_ASV245	0.524674
1236669F1225678	17C_tarta	M	060-070	Adults (26-70)	Curieuse	15.02.2020	Bacteria	Bacillota_A	Clostridia	Lachnospirales	Cellulosilyticaceae	Cellulosilyticum	Cellulosilyticum	ASV_ASV50	0.524367
1236667F1225676	29C_tarta	M	100 +	Centenarians (101+)	Curieuse	17.02.2020	Bacteria	Bacillota_A	Clostridia	Lachnospirales	Lachnospiraceae			ASV_ASV17	0.52347
1236671F1225680	ROGER_tarta	M	100 +	Centenarians (101+)	Parco Natura Viva	21.06.2021	Bacteria	Bacillota_A	Clostridia	Clostridiales	Clostridiaceae	Clostridium	Clostridium	ASV_ASV111	0.523388
1236703F1225712	4BG_tarta	M	030-040	Adults (26-70)	Botanical Garden	19.02.2020	Bacteria	Bacillota_A	Clostridia	Lachnospirales	Lachnospiraceae			ASV_ASV48	0.523256
1236664F1225673	12GH_tarta (=20C)	F	040-050	Adults (26-70)	Curieuse	15.02.2020	Bacteria	Bacillota	Bacilli	Lactobacillales	Enterococcaceae	Enterococcus_G	Enterococcus_G	ASV_ASV872	0.521916
1236668F1225677	22F_tarta	M	080-090	Elderly (71-100)	Curieuse	2022	Bacteria	Bacillota_A	Clostridia	Lachnospirales	Cellulosilyticaceae	Cellulosilyticum	Cellulosilyticum	ASV_ASV50	0.521818
1236660F1225669	30C_tarta	M	090-100	Elderly (71-100)	Curieuse	17.02.2020								ASV_ASV82	0.521415
1236672F1225681	10BG_tarta	M	040-050	Adults (26-70)	Botanical Garden	19.02.2020	Bacteria	Bacillota_A	Clostridia	Christensenellales	CAG-138	CALVLD01	CALVLD01	ASV_ASV917	0.521392
1236686F1225695	17F_tarta	M	080-090	Elderly (71-100)	Botanical Garden	2022	Bacteria	Bacillota_A	Clostridia	Christensenellales	UBA1242	UBA7868	UBA7868	ASV_ASV1118	0.521254
1236690F1225699	30F_tarta	Not determined	004-005	Juveniles (2-25)	Private Garden	2022	Bacteria	Bacillota_A	Clostridia	Lachnospirales	Lachnospiraceae			ASV_ASV66	0.521181
1236690F1225699	30F_tarta	Not determined	004-005	Juveniles (2-25)	Private Garden	2022	Bacteria	Bacillota_A	Clostridia	Lachnospirales	Lachnospiraceae	Muricomes	Muricomes	ASV_ASV811	0.521181
1236699F1225708	31C_tarta	Not determined	004-005	Juveniles (2-25)	Curieuse (Nursery)	17.02.2020	Bacteria	Bacteroidota	Bacteroidia	Bacteroidales				ASV_ASV7	0.520833
1236700F1225709	1BG_tarta	F	030-040	Adults (26-70)	Botanical Garden	19.02.2020	Bacteria	Bacteroidota	Kapabacteria	Kapabacteriales				ASV_ASV33	0.52074
1236684F1225693	27_tarta	Not determined	001-002	Juveniles (2-25)	Curieuse (Nursery)	2022	Bacteria	Bacillota_A	Clostridia	Lachnospirales	Lachnospiraceae			ASV_ASV480	0.51987
1236665F1225674	23C_tarta	M	100 +	Centenarians (101+)	Curieuse	16.02.2020	Bacteria	Spirochaetota	Spirochaetia	Treponematales	Treponemataceae	Treponema_C	Treponema_C	ASV_ASV15	0.519801
1236658F1225667	24C_tarta	F	030-040	Adults (26-70)	Curieuse	16.02.2020	Bacteria	Bacillota_A	Clostridia	Lachnospirales	Lachnospiraceae			ASV_ASV31	0.519364
1236685F1225694	16F_tarta	M	080-090	Elderly (71-100)	Botanical Garden	2022	Bacteria	Bacillota_A	Clostridia	Lachnospirales	Lachnospiraceae			ASV_ASV66	0.518763
1236672F1225681	10BG_tarta	M	040-050	Adults (26-70)	Botanical Garden	19.02.2020	Bacteria	Bacteroidota	Bacteroidia	Bacteroidales	WCHB1-69	UBA5429	UBA5429	ASV_ASV23	0.518495
1236682F1225691	25F_tarta	Not determined	005 -	Juveniles (2-25)	Curieuse (Nursery)	2022	Bacteria	Bacillota_A	Clostridia	Lachnospirales	Lachnospiraceae			ASV_ASV326	0.518466
1236703F1225712	4BG_tarta	M	030-040	Adults (26-70)	Botanical Garden	19.02.2020	Bacteria	Bacillota_A	Clostridia	Oscillospirales	Acutalibacteraceae	Yeguia	Yeguia	ASV_ASV340	0.518411
1236696F1225705	20C_tarta	F	040-050	Adults (26-70)	Curieuse	16.02.2020								ASV_ASV124	0.518327
1236704F1225713	5BG_tarta	M	080-090	Elderly (71-100)	Botanical Garden	19.02.2020	Bacteria	Bacillota_A	Clostridia	Clostridiales	Clostridiaceae	Sarcina	Sarcina	ASV_ASV154	0.518172
1236666F1225675	27C_tarta	M	080-090	Elderly (71-100)	Curieuse	16.02.2020	Bacteria	Bacillota_A	Clostridia	Lachnospirales	Lachnospiraceae			ASV_ASV25	0.518115
1236666F1225675	27C_tarta	M	080-090	Elderly (71-100)	Curieuse	16.02.2020	Bacteria	Bacteroidota	Bacteroidia	Bacteroidales	Bacteroidaceae	Bacteroides_H	Bacteroides_H	ASV_ASV30	0.518115
1236706F1225715	7BG_tarta	F	050-060	Adults (26-70)	Botanical Garden	19.02.2020	Bacteria	Bacillota_A	Clostridia	Lachnospirales	Lachnospiraceae			ASV_ASV31	0.51803
1236689F1225698	29F_tarta	Not determined	004-005	Juveniles (2-25)	Private Garden	2022	Bacteria	Bacillota_A	Clostridia	Lachnospirales	Lachnospiraceae	Lachnoclostridium	Lachnoclostridium	ASV_ASV316	0.517868
1236673F1225682	n6_tarta	M	070-080	Elderly (71-100)	Curieuse	14.02.2020	Bacteria	Bacillota_A	Clostridia	Oscillospirales	Oscillospiraceae	UBA1774	UBA1774	ASV_ASV62	0.517862
1236681F1225690	24F_tarta	M	030-040	Adults (26-70)	Curieuse	2022	Bacteria	Bacteroidota	Bacteroidia	Bacteroidales	WCHB1-69	UBA5429	UBA5429	ASV_ASV23	0.51785
1236657F1225666	�	F	030-040	Adults (26-70)	Curieuse	14.02.2020	Bacteria	Bacteroidota	Bacteroidia	Bacteroidales	WCHB1-69	UBA5429	UBA5429	ASV_ASV23	0.517237
1236683F1225692	26_tarta	Not determined	001-002	Juveniles (2-25)	Curieuse (Nursery)	2022	Bacteria	Bacillota	Bacilli	Bacillales	DSM-1321	Bacillus_AD	Bacillus_AD	ASV_ASV84	0.517122
1236675F1225684	n9_tarta	M	070-080	Elderly (71-100)	Curieuse	15.02.2020	Bacteria	Bacillota_A	Clostridia	Lachnospirales	Lachnospiraceae			ASV_ASV14	0.51577
1236706F1225715	7BG_tarta	F	050-060	Adults (26-70)	Botanical Garden	19.02.2020	Bacteria	Bacillota_A	Clostridia	Lachnospirales	Lachnospiraceae			ASV_ASV895	0.515516
1236689F1225698	29F_tarta	Not determined	004-005	Juveniles (2-25)	Private Garden	2022	RS_GCF_000189835.1~NZ_AELM01000007.1 Archaea	Methanobacteriota	Methanobacteria	Methanobacteriales	Methanobacteriaceae	Methanobrevibacter_A	Methanobrevibacter_A smithii [location=2765..4277] [ssu_len=1513] [contig_len=4429]	ASV_ASV285	0.515291
1236701F1225710	2BG_tarta	F	040-050	Adults (26-70)	Botanical Garden	19.02.2020	Bacteria	Bacillota_A	Clostridia	Clostridiales	Clostridiaceae	Sarcina	Sarcina	ASV_ASV253	0.515109
1236667F1225676	29C_tarta	M	100 +	Centenarians (101+)	Curieuse	17.02.2020	Bacteria	Spirochaetota	Spirochaetia	Treponematales	Treponemataceae			ASV_ASV211	0.514853
1236705F1225714	6BG_tarta	M	040-050	Adults (26-70)	Botanical Garden	19.02.2020	Bacteria	Bacillota_A	Clostridia	Oscillospirales	Butyricicoccaceae	Butyricicoccus_A	Butyricicoccus_A	ASV_ASV225	0.514504
1236666F1225675	27C_tarta	M	080-090	Elderly (71-100)	Curieuse	16.02.2020	Bacteria	Spirochaetota	Spirochaetia	Treponematales	Treponemataceae			ASV_ASV211	0.514234
1236696F1225705	20C_tarta	F	040-050	Adults (26-70)	Curieuse	16.02.2020	Bacteria	Bacillota_A	Clostridia	Clostridiales	Clostridiaceae	Clostridium	Clostridium	ASV_ASV8	0.514213
1236668F1225677	22F_tarta	M	080-090	Elderly (71-100)	Curieuse	2022	Bacteria	Bacillota	Bacilli	Bacillales	DSM-1321	Bacillus_AD	Bacillus_AD	ASV_ASV29	0.513831
1236673F1225682	n6_tarta	M	070-080	Elderly (71-100)	Curieuse	14.02.2020	Bacteria	Bacillota_A	Clostridia	TANB77	CAG-508	Scatovivens	Scatovivens	ASV_ASV254	0.513816
1236680F1225689	4N_tarta	Not determined	2	Juveniles (2-25)	Curieuse (Nursery)	17.02.2020	Bacteria	Bacillota_A	Clostridia	Lachnospirales	Lachnospiraceae	Anaerocolumna	Anaerocolumna	ASV_ASV182	0.51374
1236682F1225691	25F_tarta	Not determined	005 -	Juveniles (2-25)	Curieuse (Nursery)	2022	Bacteria	Bacillota_A	Clostridia	Lachnospirales	Lachnospiraceae			ASV_ASV93	0.513731
1236669F1225678	17C_tarta	M	060-070	Adults (26-70)	Curieuse	15.02.2020	Bacteria	Bacillota_A	Clostridia	Clostridiales	Clostridiaceae	Clostridium	Clostridium	ASV_ASV78	0.513555
1236678F1225687	2N_tarta	Not determined	002-003	Juveniles (2-25)	Curieuse (Nursery)	17.02.2020	Bacteria	Bacillota_A	Clostridia	Lachnospirales	Cellulosilyticaceae	Cellulosilyticum	Cellulosilyticum	ASV_ASV134	0.512361
1236678F1225687	2N_tarta	Not determined	002-003	Juveniles (2-25)	Curieuse (Nursery)	17.02.2020	Bacteria	Bacillota_A	Clostridia	Lachnospirales	Lachnospiraceae			ASV_ASV57	0.512361
1236677F1225686	1N_tarta	Not determined	001-002	Juveniles (2-25)	Curieuse (Nursery)	17.02.2020	Bacteria	Bacillota	Bacilli	Bacillales	DSM-18226	Cytobacillus	Cytobacillus	ASV_ASV1516	0.511696
1236697F1225706	21C_tarta	M	080-090	Elderly (71-100)	Curieuse	16.02.2020	Bacteria	Bacillota_A	Clostridia	Lachnospirales	Lachnospiraceae			ASV_ASV295	0.511219
1236669F1225678	17C_tarta	M	060-070	Adults (26-70)	Curieuse	15.02.2020	Bacteria	Bacillota_A	Clostridia	Clostridiales	Clostridiaceae	Clostridium	Clostridium	ASV_ASV175	0.510852
1236670F1225679	4Na_tarta	Not determined	002-003	Juveniles (2-25)	Curieuse (Nursery)	17.02.2020	Bacteria	Bacteroidota	Bacteroidia	Flavobacteriales	Flavobacteriaceae	Flavobacterium	Flavobacterium	ASV_ASV676	0.510387
1236664F1225673	12GH_tarta (=20C)	F	040-050	Adults (26-70)	Curieuse	15.02.2020	Bacteria	Bacillota_A	Clostridia	Lachnospirales	Lachnospiraceae			ASV_ASV623	0.510369
1236664F1225673	12GH_tarta (=20C)	F	040-050	Adults (26-70)	Curieuse	15.02.2020	Bacteria	Bacillota_A	Clostridia	Oscillospirales	Acutalibacteraceae			ASV_ASV734	0.510369
1236671F1225680	ROGER_tarta	M	100 +	Centenarians (101+)	Parco Natura Viva	21.06.2021	Bacteria	Bacillota_A	Clostridia	Clostridiales	Clostridiaceae	Sarcina	Sarcina	ASV_ASV154	0.510221
1236692F1225701	7_tarta	F	015 -	Juveniles (2-25)	Parco Natura Viva	21.06.2021	Bacteria	Bacillota_A	Clostridia	Lachnospirales	Lachnospiraceae			ASV_ASV66	0.509913
1236672F1225681	10BG_tarta	M	040-050	Adults (26-70)	Botanical Garden	19.02.2020	Bacteria	Bacillota_A	Clostridia	Lachnospirales	Lachnospiraceae			ASV_ASV2	0.509805
1236691F1225700	31F_tarta	Not determined	004-005	Juveniles (2-25)	Private Garden	2022	Bacteria	Bacillota_A	Clostridia	Lachnospirales	Lachnospiraceae			ASV_ASV28	0.509725
1236688F1225697	19F_tarta	F	005-006	Juveniles (2-25)	Botanical Garden	2022	Bacteria	Bacillota_A	Clostridia	Clostridiales	Clostridiaceae	Clostridium	Clostridium	ASV_ASV74	0.509507
1236657F1225666	�	F	030-040	Adults (26-70)	Curieuse	14.02.2020	Bacteria	Bacillota_A	Clostridia	Lachnospirales	Lachnospiraceae			ASV_ASV57	0.50936
1236676F1225685	n10_tarta	M	090-100	Elderly (71-100)	Curieuse	15.02.2020	Bacteria	Bacillota_A	Clostridia	Clostridiales	Clostridiaceae	Clostridium	Clostridium	ASV_ASV36	0.508922
1236703F1225712	4BG_tarta	M	030-040	Adults (26-70)	Botanical Garden	19.02.2020	Bacteria	Riflebacteria	Ozemobacteria	Ozemobacterales	Ozemobacteraceae	Rifleibacterium	Rifleibacterium	ASV_ASV102	0.508721
1236703F1225712	4BG_tarta	M	030-040	Adults (26-70)	Botanical Garden	19.02.2020	Bacteria	Bacillota_A	Clostridia	Clostridiales	Clostridiaceae	Clostridium	Clostridium	ASV_ASV9	0.508721
1236695F1225704	11_tarta	F	015 -	Juveniles (2-25)	Parco Natura Viva	21.06.2021	Bacteria	Bacillota_A	Clostridia	Lachnospirales	Lachnospiraceae			ASV_ASV122	0.508661
1236667F1225676	29C_tarta	M	100 +	Centenarians (101+)	Curieuse	17.02.2020	Bacteria	Bacillota_A	Clostridia	Lachnospirales	Lachnospiraceae			ASV_ASV2	0.508391
1236667F1225676	29C_tarta	M	100 +	Centenarians (101+)	Curieuse	17.02.2020	Bacteria	Bacillota_A	Clostridia	Clostridiales	Clostridiaceae	Clostridium	Clostridium	ASV_ASV20	0.508391
1236664F1225673	12GH_tarta (=20C)	F	040-050	Adults (26-70)	Curieuse	15.02.2020								ASV_ASV107	0.50806
1236706F1225715	7BG_tarta	F	050-060	Adults (26-70)	Botanical Garden	19.02.2020	Bacteria	Bacteroidota	Bacteroidia	Bacteroidales	WCHB1-69	UBA5429	UBA5429	ASV_ASV23	0.507972
1236681F1225690	24F_tarta	M	030-040	Adults (26-70)	Curieuse	2022	Bacteria	Bacteroidota	Bacteroidia	Bacteroidales				ASV_ASV130	0.507843
1236680F1225689	4N_tarta	Not determined	2	Juveniles (2-25)	Curieuse (Nursery)	17.02.2020	Bacteria	Bacillota_A	Clostridia	Lachnospirales	Lachnospiraceae			ASV_ASV28	0.507766
1236680F1225689	4N_tarta	Not determined	2	Juveniles (2-25)	Curieuse (Nursery)	17.02.2020	Bacteria	Bacteroidota	Bacteroidia	Flavobacteriales	Crocinitomicaceae	Taishania	Taishania	ASV_ASV557	0.507766
1236705F1225714	6BG_tarta	M	040-050	Adults (26-70)	Botanical Garden	19.02.2020	Bacteria	Bacteroidota	Bacteroidia	Bacteroidales				ASV_ASV4	0.507734
1236671F1225680	ROGER_tarta	M	100 +	Centenarians (101+)	Parco Natura Viva	21.06.2021	Bacteria	Bacillota_A	Clostridia	Lachnospirales	Lachnospiraceae			ASV_ASV251	0.506929
1236700F1225709	1BG_tarta	F	030-040	Adults (26-70)	Botanical Garden	19.02.2020	Bacteria	Bacillota_A	Clostridia	Lachnospirales	Lachnospiraceae			ASV_ASV163	0.506474
1236687F1225696	18F_tarta	F	040-050	Adults (26-70)	Botanical Garden	2022	Bacteria	Bacillota_A	Clostridia	Peptostreptococcales	Peptostreptococcaceae			ASV_ASV98	0.506339
1236663F1225672	19N_tarta	Not determined	004-005	Juveniles (2-25)	Curieuse (Nursery)	15.02.2020	Bacteria	Bacillota_A	Clostridia	Lachnospirales	Lachnospiraceae			ASV_ASV110	0.505984
1236658F1225667	24C_tarta	F	030-040	Adults (26-70)	Curieuse	16.02.2020	Bacteria	Bacillota_A	Clostridia	Oscillospirales	CAG-382	UBA1206	UBA1206	ASV_ASV262	0.505932
1236664F1225673	12GH_tarta (=20C)	F	040-050	Adults (26-70)	Curieuse	15.02.2020	Bacteria	Bacillota_A	Clostridia	Christensenellales	CAG-74	HGM11604	HGM11604	ASV_ASV702	0.50575
1236706F1225715	7BG_tarta	F	050-060	Adults (26-70)	Botanical Garden	19.02.2020	Bacteria	Bacillota_A	Clostridia	Lachnospirales	Lachnospiraceae			ASV_ASV28	0.505457
1236706F1225715	7BG_tarta	F	050-060	Adults (26-70)	Botanical Garden	19.02.2020	Bacteria	Bacteroidota	Bacteroidia	Bacteroidales	Bacteroidaceae	Phocaeicola	Phocaeicola	ASV_ASV515	0.505457
1236708F1225717	15C_tarta	M	080-090	Elderly (71-100)	Curieuse	15.02.2020	Bacteria	Bacteroidota	Kapabacteria	Kapabacteriales				ASV_ASV33	0.505415
1236697F1225706	21C_tarta	M	080-090	Elderly (71-100)	Curieuse	16.02.2020	Bacteria	Bacteroidota	Bacteroidia	Bacteroidales				ASV_ASV13	0.505097
1236697F1225706	21C_tarta	M	080-090	Elderly (71-100)	Curieuse	16.02.2020	Bacteria	Bacteroidota	Bacteroidia	Bacteroidales	UBA932			ASV_ASV65	0.505097
1236709F1225718	BULBO_tarta	M	100 +	Centenarians (101+)	Parco Natura Viva	21.06.2021	Bacteria	Bacillota_A	Clostridia	Clostridiales	Clostridiaceae	Clostridium	Clostridium	ASV_ASV105	0.50508
1236683F1225692	26_tarta	Not determined	001-002	Juveniles (2-25)	Curieuse (Nursery)	2022	Bacteria	Bacillota_A	Clostridia	Clostridiales	Clostridiaceae	Clostridium	Clostridium	ASV_ASV81	0.504751
1236698F1225707	22C_tarta	M	090-100	Elderly (71-100)	Curieuse	16.02.2020	Bacteria	Bacillota_A	Clostridia	Clostridiales	Clostridiaceae			ASV_ASV148	0.504713
1236698F1225707	22C_tarta	M	090-100	Elderly (71-100)	Curieuse	16.02.2020	Bacteria	Bacillota_A	Clostridia	Peptostreptococcales	Peptostreptococcaceae			ASV_ASV58	0.504713
1236705F1225714	6BG_tarta	M	040-050	Adults (26-70)	Botanical Garden	19.02.2020	Bacteria	Bacteroidota	Bacteroidia	Bacteroidales				ASV_ASV446	0.50435
1236667F1225676	29C_tarta	M	100 +	Centenarians (101+)	Curieuse	17.02.2020	Bacteria	Bacillota_A	Clostridia	Clostridiales	Clostridiaceae			ASV_ASV148	0.504082
1236662F1225671	n2_tarta	M	070-080	Elderly (71-100)	Curieuse	14.02.2020	Bacteria	Spirochaetota	Spirochaetia	Treponematales	UBA12059	JAAYUR01	JAAYUR01	ASV_ASV187	0.503768
1236659F1225668	28C_tarta	M	080-090	Elderly (71-100)	Curieuse	16.02.2020	Bacteria	Bacillota_A	Clostridia	Clostridiales	Clostridiaceae	Clostridium	Clostridium	ASV_ASV20	0.503762
1236693F1225702	8_tarta	F	100 +	Centenarians (101+)	Parco Natura Viva	21.06.2021	Bacteria	Bacillota_A	Clostridia	Clostridiales	Clostridiaceae	Clostridium	Clostridium	ASV_ASV68	0.503616
1236668F1225677	22F_tarta	M	080-090	Elderly (71-100)	Curieuse	2022	Bacteria	Bacillota_A	Clostridia	Clostridiales	Clostridiaceae	Clostridium	Clostridium	ASV_ASV168	0.503181
1236668F1225677	22F_tarta	M	080-090	Elderly (71-100)	Curieuse	2022	Bacteria	Bacillota_A	Clostridia	Lachnospirales	Lachnospiraceae	Velocimicrobium	Velocimicrobium	ASV_ASV357	0.503181
1236668F1225677	22F_tarta	M	080-090	Elderly (71-100)	Curieuse	2022	Bacteria	Bacteroidota	Bacteroidia	Bacteroidales				ASV_ASV77	0.503181
1236660F1225669	30C_tarta	M	090-100	Elderly (71-100)	Curieuse	17.02.2020	Bacteria	Bacillota_A	Clostridia	Clostridiales	Clostridiaceae	Clostridium_AA	Clostridium_AA	ASV_ASV99	0.502793
1236676F1225685	n10_tarta	M	090-100	Elderly (71-100)	Curieuse	15.02.2020	Bacteria	Riflebacteria	Ozemobacteria	Ozemobacterales	Ozemobacteraceae	Rifleibacterium	Rifleibacterium	ASV_ASV102	0.502639
1236702F1225711	3BG_tarta	F	030-040	Adults (26-70)	Botanical Garden	19.02.2020	Bacteria	Bacteroidota	Bacteroidia	Bacteroidales	UBA932	Bact-08	Bact-08	ASV_ASV22	0.502311
1236683F1225692	26_tarta	Not determined	001-002	Juveniles (2-25)	Curieuse (Nursery)	2022	Bacteria	Bacillota_A	Clostridia	Lachnospirales	Lachnospiraceae			ASV_ASV151	0.502276
1236679F1225688	3N_tarta	Not determined	002-003	Juveniles (2-25)	Curieuse (Nursery)	17.02.2020	Bacteria	Bacteroidota	Bacteroidia	Bacteroidales				ASV_ASV77	0.501704
1236673F1225682	n6_tarta	M	070-080	Elderly (71-100)	Curieuse	14.02.2020	Bacteria	Bacillota_A	Clostridia	Clostridiales	Clostridiaceae	Clostridium	Clostridium	ASV_ASV288	0.501679
1236673F1225682	n6_tarta	M	070-080	Elderly (71-100)	Curieuse	14.02.2020	Bacteria	Bacillota_A	Clostridia	Lachnospirales	Lachnospiraceae			ASV_ASV57	0.501679
1236704F1225713	5BG_tarta	M	080-090	Elderly (71-100)	Botanical Garden	19.02.2020	Bacteria	Bacillota_A	Clostridia	Peptostreptococcales	Anaerovoracaceae			ASV_ASV70	0.501301
1236661F1225670	9BG_tarta	M	090-100	Elderly (71-100)	Botanical Garden	18.02.2020	Bacteria	Bacteroidota	Bacteroidia	Bacteroidales	WCHB1-69	UBA1205	UBA1205	ASV_ASV67	0.501279
1236686F1225695	17F_tarta	M	080-090	Elderly (71-100)	Botanical Garden	2022	Bacteria	Bacillota_A	Clostridia	Lachnospirales	Lachnospiraceae	Lachnospira	Lachnospira	ASV_ASV241	0.501076
1236675F1225684	n9_tarta	M	070-080	Elderly (71-100)	Curieuse	15.02.2020	Bacteria	Bacillota_A	Clostridia	Christensenellales	UBA1242			ASV_ASV198	0.500949
1236665F1225674	23C_tarta	M	100 +	Centenarians (101+)	Curieuse	16.02.2020	Bacteria	Bacillota_A	Clostridia	Lachnospirales	Lachnospiraceae			ASV_ASV28	0.500678
1236665F1225674	23C_tarta	M	100 +	Centenarians (101+)	Curieuse	16.02.2020	Bacteria	Bacillota_A	Clostridia	Lachnospirales	Cellulosilyticaceae	Cellulosilyticum	Cellulosilyticum	ASV_ASV50	0.500678
1236666F1225675	27C_tarta	M	080-090	Elderly (71-100)	Curieuse	16.02.2020	Bacteria	Bacillota_A	Clostridia	Peptostreptococcales	Anaerovoracaceae			ASV_ASV70	0.50065
1236669F1225678	17C_tarta	M	060-070	Adults (26-70)	Curieuse	15.02.2020	Bacteria	Bacillota_A	Clostridia	Lachnospirales	Lachnospiraceae			ASV_ASV28	0.500041
1236709F1225718	BULBO_tarta	M	100 +	Centenarians (101+)	Parco Natura Viva	21.06.2021	Bacteria	Bacillota_A	Clostridia	Lachnospirales	Lachnospiraceae			ASV_ASV251	0.499274
1236697F1225706	21C_tarta	M	080-090	Elderly (71-100)	Curieuse	16.02.2020	Bacteria	Bacillota_A	Clostridia	Clostridiales	Clostridiaceae	Clostridium_AN	Clostridium_AN	ASV_ASV419	0.498975
1236704F1225713	5BG_tarta	M	080-090	Elderly (71-100)	Botanical Garden	19.02.2020	Bacteria	Bacillota_A	Clostridia	Clostridiales	Clostridiaceae	Clostridium	Clostridium	ASV_ASV64	0.498891
1236664F1225673	12GH_tarta (=20C)	F	040-050	Adults (26-70)	Curieuse	15.02.2020	Bacteria	Bacillota_A	Clostridia	Oscillospirales	Acutalibacteraceae			ASV_ASV158	0.498822
1236663F1225672	19N_tarta	Not determined	004-005	Juveniles (2-25)	Curieuse (Nursery)	15.02.2020	Bacteria	Bacillota_A	Clostridia	Oscillospirales	CAG-272	Avispirillum	Avispirillum	ASV_ASV193	0.498279
1236663F1225672	19N_tarta	Not determined	004-005	Juveniles (2-25)	Curieuse (Nursery)	15.02.2020								ASV_ASV347	0.498279
1236702F1225711	3BG_tarta	F	030-040	Adults (26-70)	Botanical Garden	19.02.2020	Bacteria	Bacteroidota	Bacteroidia	Bacteroidales	UBA932	Bact-08	Bact-08	ASV_ASV54	0.49809
1236679F1225688	3N_tarta	Not determined	002-003	Juveniles (2-25)	Curieuse (Nursery)	17.02.2020	Bacteria	Bacteroidota	Bacteroidia	Bacteroidales				ASV_ASV922	0.497874
1236661F1225670	9BG_tarta	M	090-100	Elderly (71-100)	Botanical Garden	18.02.2020	Bacteria	Spirochaetota	Spirochaetia	Treponematales	Treponemataceae	Treponema_D	Treponema_D	ASV_ASV202	0.497869
1236661F1225670	9BG_tarta	M	090-100	Elderly (71-100)	Botanical Garden	18.02.2020	Bacteria	Bacillota_A	Clostridia	Clostridiales	Clostridiaceae	Clostridium	Clostridium	ASV_ASV8	0.497869
1236696F1225705	20C_tarta	F	040-050	Adults (26-70)	Curieuse	16.02.2020	Bacteria	Bacillota_A	Clostridia	Lachnospirales	Lachnospiraceae			ASV_ASV57	0.497758
1236673F1225682	n6_tarta	M	070-080	Elderly (71-100)	Curieuse	14.02.2020	Bacteria	Bacillota_A	Clostridia	Clostridiales	Clostridiaceae	Clostridium	Clostridium	ASV_ASV44	0.497633
1236689F1225698	29F_tarta	Not determined	004-005	Juveniles (2-25)	Private Garden	2022	Bacteria	Bacillota	Bacilli	Bacillales	R1DC41	Mangrovibacillus	Mangrovibacillus	ASV_ASV989	0.497256
1236701F1225710	2BG_tarta	F	040-050	Adults (26-70)	Botanical Garden	19.02.2020	Bacteria	Spirochaetota	Spirochaetia	Treponematales	Treponemataceae	Treponema_D	Treponema_D	ASV_ASV202	0.49714
1236658F1225667	24C_tarta	F	030-040	Adults (26-70)	Curieuse	16.02.2020	Bacteria	Bacillota	Bacilli	ML615J-28	CAG-313	UMGS75	UMGS75	ASV_ASV117	0.496978
1236670F1225679	4Na_tarta	Not determined	002-003	Juveniles (2-25)	Curieuse (Nursery)	17.02.2020	Bacteria	Pseudomonadota	Alphaproteobacteria	Rhodobacterales	Rhodobacteraceae	Pseudogemmobacter	Pseudogemmobacter	ASV_ASV575	0.496956
1236664F1225673	12GH_tarta (=20C)	F	040-050	Adults (26-70)	Curieuse	15.02.2020	Bacteria	Bacillota_A	Clostridia	Peptostreptococcales	Peptostreptococcaceae	Terrisporobacter	Terrisporobacter	ASV_ASV10	0.496513
1236664F1225673	12GH_tarta (=20C)	F	040-050	Adults (26-70)	Curieuse	15.02.2020	Bacteria	Planctomycetota	Planctomycetia	Pirellulales	Thermoguttaceae	JADLEL01	JADLEL01	ASV_ASV157	0.496513
1236692F1225701	7_tarta	F	015 -	Juveniles (2-25)	Parco Natura Viva	21.06.2021	Bacteria	Bacillota_A	Clostridia	Lachnospirales	Lachnospiraceae			ASV_ASV121	0.496494
1236680F1225689	4N_tarta	Not determined	2	Juveniles (2-25)	Curieuse (Nursery)	17.02.2020	Bacteria	Bacillota	Bacilli	Bacillales	DSM-1321	Bacillus_AD	Bacillus_AD	ASV_ASV323	0.495818
1236680F1225689	4N_tarta	Not determined	2	Juveniles (2-25)	Curieuse (Nursery)	17.02.2020	Bacteria	Pseudomonadota	Gammaproteobacteria	Pseudomonadales	Moraxellaceae	Acinetobacter	Acinetobacter	ASV_ASV869	0.495818
1236708F1225717	15C_tarta	M	080-090	Elderly (71-100)	Curieuse	15.02.2020	Bacteria	Bacteroidota	Bacteroidia	Bacteroidales				ASV_ASV77	0.495658
1236667F1225676	29C_tarta	M	100 +	Centenarians (101+)	Curieuse	17.02.2020	Bacteria	Bacteroidota	Bacteroidia	Bacteroidales				ASV_ASV77	0.495465
1236706F1225715	7BG_tarta	F	050-060	Adults (26-70)	Botanical Garden	19.02.2020	Bacteria	Bacillota_A	Clostridia	Oscillospirales	Butyricicoccaceae	Butyricicoccus_A	Butyricicoccus_A	ASV_ASV225	0.495398
1236681F1225690	24F_tarta	M	030-040	Adults (26-70)	Curieuse	2022								ASV_ASV34	0.495334
1236684F1225693	27_tarta	Not determined	001-002	Juveniles (2-25)	Curieuse (Nursery)	2022	Bacteria	Bacillota	Bacilli	Bacillales	DSM-1321	Bacillus_AD	Bacillus_AD	ASV_ASV29	0.494876
1236698F1225707	22C_tarta	M	090-100	Elderly (71-100)	Curieuse	16.02.2020	Bacteria	Bacteroidota	Bacteroidia	Bacteroidales	UBA932			ASV_ASV37	0.494685
1236690F1225699	30F_tarta	Not determined	004-005	Juveniles (2-25)	Private Garden	2022	Bacteria	Bacillota_A	Clostridia	Clostridiales	Clostridiaceae	Clostridium	Clostridium	ASV_ASV111	0.494454
1236690F1225699	30F_tarta	Not determined	004-005	Juveniles (2-25)	Private Garden	2022	Bacteria	Pseudomonadota	Gammaproteobacteria	Pseudomonadales	Moraxellaceae	Acinetobacter	Acinetobacter	ASV_ASV96	0.494454
1236687F1225696	18F_tarta	F	040-050	Adults (26-70)	Botanical Garden	2022	Bacteria	Bacteroidota	Bacteroidia	Bacteroidales	Bacteroidaceae			ASV_ASV119	0.494187
1236701F1225710	2BG_tarta	F	040-050	Adults (26-70)	Botanical Garden	19.02.2020	Bacteria	Bacillota_A	Clostridia	Christensenellales	CAG-138	UBA3792	UBA3792	ASV_ASV500	0.494145
1236704F1225713	5BG_tarta	M	080-090	Elderly (71-100)	Botanical Garden	19.02.2020	Bacteria	Bacillota_A	Clostridia	Lachnospirales	Lachnospiraceae			ASV_ASV122	0.494071
1236671F1225680	ROGER_tarta	M	100 +	Centenarians (101+)	Parco Natura Viva	21.06.2021	Bacteria	Bacillota_A	Clostridia	Clostridiales	Clostridiaceae	Clostridium	Clostridium	ASV_ASV300	0.493762
1236657F1225666	�	F	030-040	Adults (26-70)	Curieuse	14.02.2020	Bacteria	Bacillota	Bacilli	ML615J-28	CAG-313	UMGS75	UMGS75	ASV_ASV117	0.493607
1236673F1225682	n6_tarta	M	070-080	Elderly (71-100)	Curieuse	14.02.2020	Bacteria	Bacillota_A	Clostridia	Clostridiales	Clostridiaceae			ASV_ASV185	0.493587
1236709F1225718	BULBO_tarta	M	100 +	Centenarians (101+)	Parco Natura Viva	21.06.2021	Bacteria	Bacteroidota	Bacteroidia	Bacteroidales	UBA932	Bact-08	Bact-08	ASV_ASV22	0.493469
1236672F1225681	10BG_tarta	M	040-050	Adults (26-70)	Botanical Garden	19.02.2020	Bacteria	Bacillota	Bacilli	Bacillales	DSM-1321	Bacillus_AD	Bacillus_AD	ASV_ASV6	0.492425
1236672F1225681	10BG_tarta	M	040-050	Adults (26-70)	Botanical Garden	19.02.2020	Bacteria	Bacillota	Bacilli	RFN20	CAG-826	Onthovivens	Onthovivens	ASV_ASV691	0.492425
1236675F1225684	n9_tarta	M	070-080	Elderly (71-100)	Curieuse	15.02.2020	Bacteria	Bacillota_A	Clostridia	Clostridiales	Clostridiaceae	Clostridium	Clostridium	ASV_ASV20	0.492056
1236669F1225678	17C_tarta	M	060-070	Adults (26-70)	Curieuse	15.02.2020	Bacteria	Bacteroidota	Bacteroidia	Bacteroidales	UBA932	Bact-08	Bact-08	ASV_ASV54	0.491932
1236708F1225717	15C_tarta	M	080-090	Elderly (71-100)	Curieuse	15.02.2020	Bacteria	Bacillota_A	Clostridia	Lachnospirales	Lachnospiraceae			ASV_ASV118	0.491755
1236701F1225710	2BG_tarta	F	040-050	Adults (26-70)	Botanical Garden	19.02.2020	Bacteria	Bacillota_A	Clostridia	Peptostreptococcales	Peptostreptococcaceae	Terrisporobacter	Terrisporobacter	ASV_ASV10	0.49115
1236688F1225697	19F_tarta	F	005-006	Juveniles (2-25)	Botanical Garden	2022								ASV_ASV196	0.491047
1236699F1225708	31C_tarta	Not determined	004-005	Juveniles (2-25)	Curieuse (Nursery)	17.02.2020	Bacteria	Bacillota_A	Clostridia	Clostridiales	Clostridiaceae	Clostridium	Clostridium	ASV_ASV68	0.490196
1236687F1225696	18F_tarta	F	040-050	Adults (26-70)	Botanical Garden	2022	Bacteria	Bacillota_A	Clostridia	Lachnospirales	Lachnospiraceae			ASV_ASV227	0.490137
1236697F1225706	21C_tarta	M	080-090	Elderly (71-100)	Curieuse	16.02.2020	Bacteria	Bacillota_A	Clostridia	Oscillospirales	Acutalibacteraceae			ASV_ASV136	0.489791
1236692F1225701	7_tarta	F	015 -	Juveniles (2-25)	Parco Natura Viva	21.06.2021	Bacteria	Spirochaetota	Spirochaetia	Treponematales	Treponemataceae			ASV_ASV211	0.489785
1236702F1225711	3BG_tarta	F	030-040	Adults (26-70)	Botanical Garden	19.02.2020	Bacteria	Bacillota_A	Clostridia	Lachnospirales	Lachnospiraceae			ASV_ASV127	0.489648
1236696F1225705	20C_tarta	F	040-050	Adults (26-70)	Curieuse	16.02.2020	Bacteria	Bacillota_A	Clostridia	Oscillospirales	Ruminococcaceae	HUN007	HUN007	ASV_ASV43	0.489531
1236672F1225681	10BG_tarta	M	040-050	Adults (26-70)	Botanical Garden	19.02.2020	Bacteria	Bacillota_A	Clostridia	Lachnospirales	Lachnospiraceae			ASV_ASV88	0.489529
1236669F1225678	17C_tarta	M	060-070	Adults (26-70)	Curieuse	15.02.2020	Bacteria	Bacteroidota	Bacteroidia	Bacteroidales				ASV_ASV46	0.489229
1236667F1225676	29C_tarta	M	100 +	Centenarians (101+)	Curieuse	17.02.2020	Bacteria	Spirochaetota	Spirochaetia	Treponematales	UBA12059	SZUA-370	SZUA-370	ASV_ASV95	0.489003
1236660F1225669	30C_tarta	M	090-100	Elderly (71-100)	Curieuse	17.02.2020	Bacteria	Bacillota_A	Clostridia	Lachnospirales	Lachnospiraceae			ASV_ASV153	0.488827
1236660F1225669	30C_tarta	M	090-100	Elderly (71-100)	Curieuse	17.02.2020	Bacteria	Bacteroidota	Bacteroidia	Bacteroidales	WCHB1-69	UBA1205	UBA1205	ASV_ASV67	0.488827
1236693F1225702	8_tarta	F	100 +	Centenarians (101+)	Parco Natura Viva	21.06.2021	Bacteria	Bacillota_A	Clostridia	Lachnospirales	Cellulosilyticaceae	Cellulosilyticum	Cellulosilyticum	ASV_ASV286	0.48847
1236658F1225667	24C_tarta	F	030-040	Adults (26-70)	Curieuse	16.02.2020	Bacteria	Fibrobacterota	Fibrobacteria	Fibrobacterales	Fibrobacteraceae			ASV_ASV138	0.488023
1236670F1225679	4Na_tarta	Not determined	002-003	Juveniles (2-25)	Curieuse (Nursery)	17.02.2020	Bacteria	Pseudomonadota	Gammaproteobacteria	Pseudomonadales	Pseudomonadaceae	Pseudomonas_E	Pseudomonas_E	ASV_ASV776	0.488001
1236686F1225695	17F_tarta	M	080-090	Elderly (71-100)	Botanical Garden	2022								ASV_ASV196	0.487624
1236702F1225711	3BG_tarta	F	030-040	Adults (26-70)	Botanical Garden	19.02.2020	RS_GCF_001729965.1~NZ_JRWK01000030.1 Archaea	Methanobacteriota	Methanobacteria	Methanobacteriales	Methanobacteriaceae	Methanosphaera	Methanosphaera sp001729965 [location=1..1480] [ssu_len=1480] [contig_len=1498]	ASV_ASV41	0.487537
1236678F1225687	2N_tarta	Not determined	002-003	Juveniles (2-25)	Curieuse (Nursery)	17.02.2020	Bacteria	Bacillota_A	Clostridia	Lachnospirales	Lachnospiraceae			ASV_ASV93	0.487489
1236688F1225697	19F_tarta	F	005-006	Juveniles (2-25)	Botanical Garden	2022	Bacteria	Bacillota_A	Clostridia	Lachnospirales	Lachnospiraceae			ASV_ASV1233	0.487355
1236688F1225697	19F_tarta	F	005-006	Juveniles (2-25)	Botanical Garden	2022	Bacteria	Spirochaetota	Spirochaetia	Treponematales	Treponemataceae			ASV_ASV135	0.487355
1236664F1225673	12GH_tarta (=20C)	F	040-050	Adults (26-70)	Curieuse	15.02.2020	Bacteria	Bacillota_A	Clostridia	TANB77	CAG-508	Scatovivens	Scatovivens	ASV_ASV314	0.487275
1236666F1225675	27C_tarta	M	080-090	Elderly (71-100)	Curieuse	16.02.2020	Bacteria	Bacillota_A	Clostridia	Clostridiales	Clostridiaceae	Clostridium_AA	Clostridium_AA	ASV_ASV61	0.487067
1236704F1225713	5BG_tarta	M	080-090	Elderly (71-100)	Botanical Garden	19.02.2020	Bacteria	Bacteroidota	Bacteroidia	Bacteroidales	Bacteroidaceae			ASV_ASV60	0.486841
1236672F1225681	10BG_tarta	M	040-050	Adults (26-70)	Botanical Garden	19.02.2020	Bacteria	Bacteroidota	Bacteroidia	Bacteroidales	UBA932	Bact-08	Bact-08	ASV_ASV22	0.486632
1236675F1225684	n9_tarta	M	070-080	Elderly (71-100)	Curieuse	15.02.2020	Bacteria	Bacteroidota	Bacteroidia	Bacteroidales	UBA932			ASV_ASV37	0.486128
1236687F1225696	18F_tarta	F	040-050	Adults (26-70)	Botanical Garden	2022	Bacteria	Fibrobacterota	Fibrobacteria	Fibrobacterales	Fibrobacteraceae	CAIRAY01	CAIRAY01	ASV_ASV142	0.486086
1236708F1225717	15C_tarta	M	080-090	Elderly (71-100)	Curieuse	15.02.2020	Bacteria	Bacillota_A	Clostridia	Lachnospirales	Lachnospiraceae			ASV_ASV261	0.485901
1236663F1225672	19N_tarta	Not determined	004-005	Juveniles (2-25)	Curieuse (Nursery)	15.02.2020	Bacteria	Bacillota_A	Clostridia	Christensenellales	UBA1242			ASV_ASV667	0.485437
1236696F1225705	20C_tarta	F	040-050	Adults (26-70)	Curieuse	16.02.2020	Bacteria	Bacillota_A	Clostridia	Lachnospirales	Lachnospiraceae	Velocimicrobium	Velocimicrobium	ASV_ASV40	0.485417
1236695F1225704	11_tarta	F	015 -	Juveniles (2-25)	Parco Natura Viva	21.06.2021	Bacteria	Bacillota_A	Clostridia	Lachnospirales	Lachnospiraceae			ASV_ASV151	0.485094
1236665F1225674	23C_tarta	M	100 +	Centenarians (101+)	Curieuse	16.02.2020	Bacteria	Bacillota_A	Clostridia	Lachnospirales	Lachnospiraceae			ASV_ASV17	0.485032
1236685F1225694	16F_tarta	M	080-090	Elderly (71-100)	Botanical Garden	2022	Bacteria	Spirochaetota	Spirochaetia	Treponematales	Treponemataceae	Treponema_D	Treponema_D	ASV_ASV365	0.48477
1236693F1225702	8_tarta	F	100 +	Centenarians (101+)	Parco Natura Viva	21.06.2021	Bacteria	Bacillota_A	Clostridia	Clostridiales	Clostridiaceae	Clostridium	Clostridium	ASV_ASV937	0.484683
1236698F1225707	22C_tarta	M	090-100	Elderly (71-100)	Curieuse	16.02.2020	Bacteria	Bacillota_A	Clostridia	Lachnospirales	Lachnospiraceae			ASV_ASV2	0.484658
1236659F1225668	28C_tarta	M	080-090	Elderly (71-100)	Curieuse	16.02.2020	Bacteria	Spirochaetota	Spirochaetia	Treponematales	Treponemataceae			ASV_ASV204	0.484632
[truncated: 252,334+ more rows]
