# Supplementary material for: Disentangling the gut microbiota of Aldabra giant tortoises of different ages and environments
Source: PeerJ. 2025 Jun 10;13:e19566. doi: 10.7717/peerj.19566 (PMC12164811; doi:10.7717/peerj.19566)
Supplement: Supplemental Information 3 [file peerj-13-19566-s003.xlsx]

## Sheet: Sheet1
Table S3. Paiwise PERMANOVA test results (BH method used for p-value correction)
Distance matrix	Pairs	R2 value	p value	p value adjusted	p value significance
Bray-Curtis	Adults (26-70) vs Elderly (71-100)	0.0807315	0.008	0.016
Bray-Curtis	Adults (26-70) vs Juveniles (2-25)	0.148876	0.001	0.003	*
Bray-Curtis	Adults (26-70) vs Centenarians (101+)	0.107717	0.021	0.0315
Bray-Curtis	Elderly (71-100) vs Juveniles (2-25)	0.130807	0.001	0.003	*
Bray-Curtis	Elderly (71-100) vs Centenarians (101+)	0.0971202	0.033	0.0396
Bray-Curtis	Juveniles (2-25) vs Centenarians (101+)	0.0775296	0.044	0.044
Bray-Curtis	Curieuse vs Botanical Garden	0.208285	0.001	0.00125	*
Bray-Curtis	Curieuse vs Curieuse (Nursery)	0.201112	0.001	0.00125	*
Bray-Curtis	Curieuse vs Parco Natura Viva	0.307844	0.001	0.00125	*
Bray-Curtis	Curieuse vs Private Garden	0.212231	0.001	0.00125	*
Bray-Curtis	Botanical Garden vs Curieuse (Nursery)	0.287414	0.001	0.00125	*
Bray-Curtis	Botanical Garden vs Parco Natura Viva	0.313715	0.001	0.00125	*
Bray-Curtis	Botanical Garden vs Private Garden	0.215155	0.001	0.00125	*
Bray-Curtis	Curieuse (Nursery) vs Parco Natura Viva	0.373122	0.001	0.00125	*
Bray-Curtis	Curieuse (Nursery) vs Private Garden	0.251635	0.002	0.00222222	*
Bray-Curtis	Parco Natura Viva vs Private Garden	0.408091	0.017	0.017
Unweighted UniFrac	Adults (26-70) vs Elderly (71-100)	0.059403	0.007	0.014
Unweighted UniFrac	Adults (26-70) vs Juveniles (2-25)	0.150171	0.001	0.003	*
Unweighted UniFrac	Adults (26-70) vs Centenarians (101+)	0.107037	0.014	0.021
Unweighted UniFrac	Elderly (71-100) vs Juveniles (2-25)	0.135356	0.001	0.003	*
Unweighted UniFrac	Elderly (71-100) vs Centenarians (101+)	0.0931222	0.021	0.0252
Unweighted UniFrac	Juveniles (2-25) vs Centenarians (101+)	0.0697477	0.046	0.046
Unweighted UniFrac	Curieuse vs Botanical Garden	0.125579	0.001	0.00166667	*
Unweighted UniFrac	Curieuse vs Curieuse (Nursery)	0.196613	0.001	0.00166667	*
Unweighted UniFrac	Curieuse vs Parco Natura Viva	0.26974	0.001	0.00166667	*
Unweighted UniFrac	Curieuse vs Private Garden	0.222195	0.001	0.00166667	*
Unweighted UniFrac	Botanical Garden vs Curieuse (Nursery)	0.22098	0.001	0.00166667	*
Unweighted UniFrac	Botanical Garden vs Parco Natura Viva	0.276148	0.001	0.00166667	*
Unweighted UniFrac	Botanical Garden vs Private Garden	0.239797	0.007	0.00875	*
Unweighted UniFrac	Curieuse (Nursery) vs Parco Natura Viva	0.26791	0.002	0.00285714	*
Unweighted UniFrac	Curieuse (Nursery) vs Private Garden	0.188468	0.008	0.00888889	*
Unweighted UniFrac	Parco Natura Viva vs Private Garden	0.264304	0.015	0.015
Weighted UniFrac	Adults (26-70) vs Elderly (71-100)	0.0871818	0.012	0.0144
Weighted UniFrac	Adults (26-70) vs Juveniles (2-25)	0.208617	0.001	0.003	*
Weighted UniFrac	Adults (26-70) vs Centenarians (101+)	0.180964	0.01	0.0144
Weighted UniFrac	Elderly (71-100) vs Juveniles (2-25)	0.236106	0.001	0.003	*
Weighted UniFrac	Elderly (71-100) vs Centenarians (101+)	0.149869	0.012	0.0144
Weighted UniFrac	Curieuse vs Botanical Garden	0.121233	0.002	0.00333333	*
Weighted UniFrac	Curieuse vs Curieuse (Nursery)	0.243368	0.001	0.002	*
Weighted UniFrac	Curieuse vs Parco Natura Viva	0.371442	0.001	0.002	*
Weighted UniFrac	Curieuse vs Private Garden	0.321797	0.001	0.002	*
Weighted UniFrac	Botanical Garden vs Curieuse (Nursery)	0.268356	0.001	0.002	*
Weighted UniFrac	Botanical Garden vs Parco Natura Viva	0.430161	0.001	0.002	*
Weighted UniFrac	Botanical Garden vs Private Garden	0.414025	0.003	0.00428571	*
Weighted UniFrac	Curieuse (Nursery) vs Parco Natura Viva	0.297384	0.005	0.00625	*
Weighted UniFrac	Curieuse (Nursery) vs Private Garden	0.253809	0.02	0.0222222
